# Supplementary material for: Charting the N-Terminal Acetylome: A Comprehensive Map of Human NatA Substrates
Source: MDPI journal article supplement (doi:10.3390/ijms221910692), 2021-10-02
Supplement: s1 [file s1]

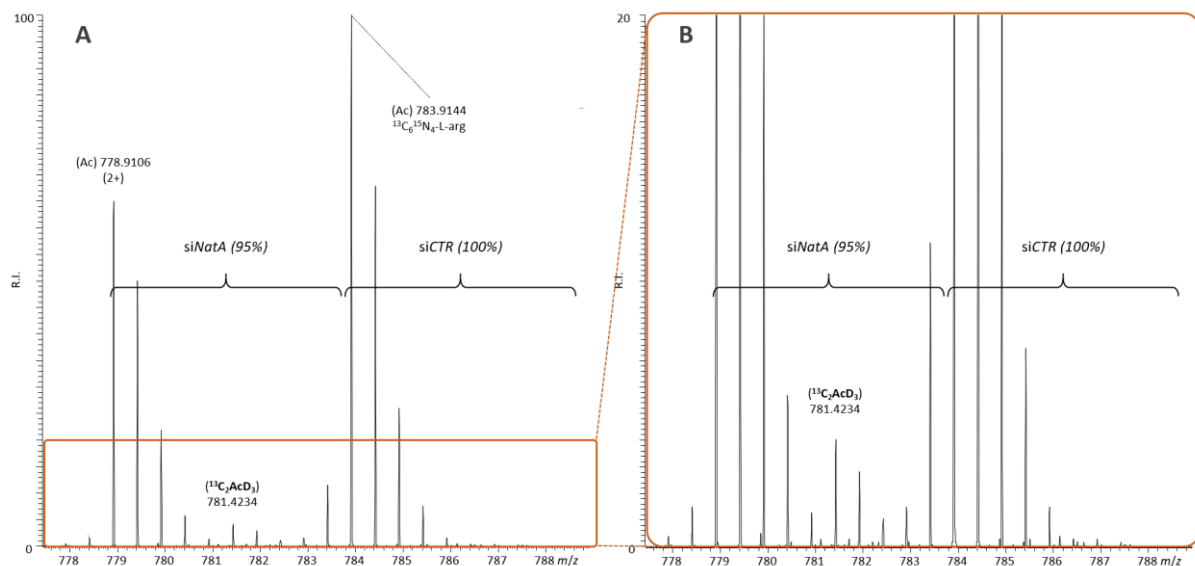

**Figure S2| The effect of *siNatA* knockdown on the Ala- starting *NatA* type N-terminus of THUMP domain-containing protein 1.** (A) MS spectrum of the N-terminus originating from THUMP domain-containing protein 1 ( $^2\text{AAPAQTTQPGGGKR}^{16}$ ) is shown. The peptide was fully Nt-acetylated in the control setup while being only partially Nt-acetylated (95%) in the *siNatA* knockdown sample. Since in this representative example, clearly two isotopic envelopes are discernible in the *siNatA* setup versus the exclusive occurrence of isotopic envelope corresponding to the Nt-acetylated heavy labelled peptide in the *siCTR* setup (zoomed panel B), similar examples with a minimum difference of 5% in the degree of NTA are additionally considered as being affected by *siNatA* knockdown (Supplemental Tables S1-2 and ‘Material and Methods’).
