# Supplementary material for: Charting the N-Terminal Acetylome: A Comprehensive Map of Human NatA Substrates
Source: MDPI journal article supplement (doi:10.3390/ijms221910692), 2021-10-02
Supplement: s1 [file s1]

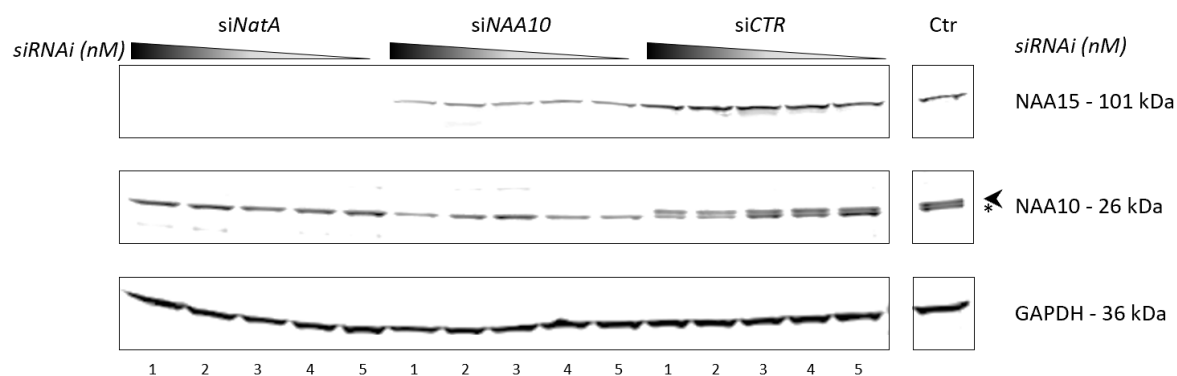

**Figure S1 | Optimization of siNataA-knockdown conditions in human A-431 cells.** siRNA transfections were performed using HiPerFect (Qiagen) and varying concentration (5-100 nM) of non-targeting siRNA (*siCTR*), *siNAA10* or *siNAA10/siNAA15* pool (*siNataA*). Cells were transfected 24 hours after seeding, re-transfected under identical conditions 48 hours after initial transfection and harvested 96 hours post initial siRNA transfection. Non-transfected cells (Ctr) served as an additional control. Blots were probed with anti-NAA10 and anti-NAA15 to assess levels of endogenous NAA10 (26 kDa) and NAA15 (101 kDa). Next to GAPDH (36 kDa), the asterisk indicates a non-specific band that serve as loading control. Numbering from 1 to 5 correspond to siRNA concentrations of 100, 50, 20, 10 and 5 nM, respectively.
