# Supplementary material for: Charting the N-Terminal Acetylome: A Comprehensive Map of Human NatA Substrates
Source: Int J Mol Sci. 2021 Oct 2;22(19):10692. doi: 10.3390/ijms221910692 (PMC8509067; doi:10.3390/ijms221910692)
Supplement: Supplementary file 1 [file ijms-22-10692-s001.zip › Tables_S1-4.xlsx]

## Sheet: Table S1
	P1 (if any)	P1'	P2'	NAT type	MS2 spectra	N-term mods (MS2 spectra)	N-term HS	P1'-P5'	Sequence	C-term HS	NTA siNatA corr (%)	NTA siCTR corr (%)	∆ NTA	siNatA-affected substrate A-431 (this study)	S37P B-cells	S37P fibroblasts	siNatA HeLa	NAA15 --/+, KO affected substrate	N-term ratio corr	log2 ratio	Significance	Significant (setup)	Start	Stop	Accession	UNIPROT	Description	Isoforms	N- and C-term (MS2 spectra)	Mascot highest score (HS)	precursor HS	charge HS
	M	A	G	NatA	4	Ace(4)	Ace	AGQAF	AGQAFR	R<C13N15>	94	100	6	√					1.16601	0.221577	0.413027		2	7	P61604	CH10_HUMAN	10 kDa heat shock protein, mitochondrial	Q86WI1 (2465-2470)	Ace|R<C13N15>(4)	47	351.184	2
	-	M	T	other	5	Ace(5)	Ace	MTMDK	MTMDKSELVQKAKLAEQAER	R	100	100	0						1.20557	0.269715	0.531423		1	20	P31946	1433B_HUMAN	14-3-3 protein beta/alpha		Ace|R(4), Ace|R<C13N15>(1)	57	841.102	3
	M	T	M	NatA	10	Ace(10)	Ace	TMDKS	TMDKSELVQKAKLAEQAER	R	68	100	32	√	√	√		√	1.21127	0.276518	0.548153		2	20	P31946	1433B_HUMAN	14-3-3 protein beta/alpha		Ace|R(7), Ace|R<C13N15>(3)	123	1187.63	2
	-	M	E	NatB	20	Ace(20)	Ace	MEKTE	MEKTELIQKAKLAEQAER	R	100	100	0						0.922671	-0.116111	-0.417509		1	18	P27348	1433T_HUMAN	14-3-3 protein theta		Ace|R(17), Ace|R<C13N15>(3)	125	1158.13	2
	-	M	D	NatB	56	Ace(56)	Ace	MDKNE	MDKNELVQKAKLAEQAER	R	100	100	0						0.793483	-0.333728	-0.952734		1	18	P63104	1433Z_HUMAN	14-3-3 protein zeta/delta		Ace|R(40), Ace|R<C13N15>(16)	118	1150.61	2
	-	M	K	other	3	Ace(2), AcD3C13(1)	Ace	MKVST	MKVSTLR	R	77	79	2						1.35768	0.441143	0.953047		1	7	Q9C0C2	TB182_HUMAN	182 kDa tankyrase-1-binding protein		Ace|R(1), Ace|R<C13N15>(1), AcD3C13|R<C13N15>(1)	48	470.268	2
	-	M	F	NatC or other	2	Ace(2)	Ace	MFTLP	MFTLPQKDFR	R	100	100	0						1.684	0.751892	1.71733		1	10	Q96QU6	1A1L1_HUMAN	1-aminocyclopropane-1-carboxylate synthase-like protein 1		Ace|R(1), Ace|R<C13N15>(1)	39	694.355	2
	-	M	D	NatB	10	Ace(10)	Ace	MDLYS	MDLYSTPAAALDR	R	100	100	0						1.33456	0.416361	0.892094		1	13	Q9Y6K5	OAS3_HUMAN	2'-5'-oligoadenylate synthase 3		Ace|R(6), Ace|R<C13N15>(4)	95	741.351	2
	M	A	L	NatA	1	Ace(1)	Ace	ALMQE	ALMQELYSTPASR	R	100	100	0						2.54174	1.34582	3.17807	99% siNatA	2	14	Q15646	OASL_HUMAN	2'-5'-oligoadenylate synthase-like protein		Ace|R(1)	70	762.872	2
	-	M	N	NatB or other	2	Ace(2)	Ace	MNLLP	MNLLPNIESPVTR	R	100	100	0						0.85237	-0.230448	-0.698719		1	13	P17980	PRS6A_HUMAN	26S protease regulatory subunit 6A		Ace|R<C13N15>(1), Ace|R(1)	51	771.404	2
	M	P	D	none	15	AcD3C13(15)	AcD3C13	PDYLG	PDYLGADQR	R<C13N15>	0	0	0						0.963798	-0.0531977	-0.262775		2	10	P35998	PRS7_HUMAN	26S protease regulatory subunit 7		AcD3C13|R<C13N15>(8), AcD3C13|R(7)	78	546.271	2
	M	A	L	NatA	7	Ace(7)	Ace	ALDGP	ALDGPEQMELEEGKAGSGLR	R	95	100	5	√	√	√		(√)	0.996667	-0.00481702	-0.143783		2	21	P62195	PRS8_HUMAN	26S protease regulatory subunit 8		Ace|R(4), Ace|R<C13N15>(3)	109	1096.53	2
	M	A	A	NatA	26	Ace(26)	Ace	AAAAV	AAAAVVEFQR	R<C13N15>	100	100	0						0.952138	-0.0707567	-0.305961		2	11	O00231	PSD11_HUMAN	26S proteasome non-ATPase regulatory subunit 11		Ace|R(15), Ace|R<C13N15>(11)	86	557.3	2
	-	M	K	other	5	AcD3C13(3), Ace(2)	Ace	MKQEG	MKQEGSAR	R<C13N15>	51	53	2						1.0365	0.0517201	-0.0047316		1	8	O43242	PSMD3_HUMAN	26S proteasome non-ATPase regulatory subunit 3		AcD3C13|R(2), AcD3C13|R<C13N15>(1), Ace|R(1), Ace|R<C13N15>(1)	54	511.252	2
	M	V	L	NatA	8	AcD3C13(8)	AcD3C13	VLEST	VLESTMVCVDNSEYMR	R	0	0	0						0.989225	-0.0156294	-0.170376		2	17	P55036	PSMD4_HUMAN	26S proteasome non-ATPase regulatory subunit 4		AcD3C13|R(4), AcD3C13|R<C13N15>(4)	100	1006.44	2
	M	A	A	NatA	5	Ace(5)	Ace	AAQAL	AAQALALLR	R<C13N15>	100	100	0						0.83465	-0.260757	-0.773262		2	10	Q16401	PSMD5_HUMAN	26S proteasome non-ATPase regulatory subunit 5		Ace|R<C13N15>(3), Ace|R(2)	82	489.802	2
	M	P	L	none	8	AcD3C13(8)	AcD3C13	PLENL	PLENLEEEGLPKNPDLR	R<C13N15>	0	0	0						1.00259	0.00373535	-0.122749		2	18	Q15008	PSMD6_HUMAN	26S proteasome non-ATPase regulatory subunit 6		AcD3C13|R<C13N15>(4), AcD3C13|R(4)	87	1034.05	2
	M	S	S	NatA	2	Ace(2)	Ace	SSLSE	SSLSEYAFR	R<C13N15>	100	100	0						1.25654	0.329457	0.678355		2	10	Q9Y291	RT33_HUMAN	28S ribosomal protein S33, mitochondrial		Ace|R(1), Ace|R<C13N15>(1)	33	556.268	2
	-	M	M	other	6	Ace(6)	Ace	MMGSK	MMGSKMASASR	R	100	100	0						1.24166	0.31227	0.636086		1	11	P82909	RT36_HUMAN	28S ribosomal protein S36, mitochondrial		Ace|R(3), Ace|R<C13N15>(3)	81	647.283	2
	M	A	A	NatA	8	Ace(8)	Ace	AAAMV	AAAMVPGR	R<C13N15>	100	100	0						1.06779	0.0946257	0.100794		2	9	O43598	DNPH1_HUMAN	2'-deoxynucleoside 5'-phosphate N-hydrolase 1		Ace|R<C13N15>(2), Ace|R(6)	75	420.717	2
	M	P	D	none	4	AcD3C13(4)	AcD3C13	PDSNF	PDSNFAER	R<C13N15>	0	0	0						1.10425	0.143067	0.219934		2	9	Q9UJ83	HACL1_HUMAN	2-hydroxyacyl-CoA lyase 1		AcD3C13|R(2), AcD3C13|R<C13N15>(2)	65	496.737	2
	M	A	S	NatA	3	Ace(3)	Ace	ASSNT	ASSNTVLMR	R	100	100	0						1.1523	0.204512	0.371057		2	10	O95861	BPNT1_HUMAN	3'(2'),5'-bisphosphate nucleotidase 1		Ace|R<C13N15>(2), Ace|R(1)	74	518.758	2
	M	A	G	NatA	2	Ace(1), AcD3C13(1)	AcD3C13	AGPLQ	AGPLQGGGAR	R	40	91	51	√	√	√			0.676056	-0.564785	-1.52101		2	11	Q9P015	RM15_HUMAN	39S ribosomal protein L15, mitochondrial		Ace|R<C13N15>(1), AcD3C13|R(1)	66	465.759	2
	M	A	S	NatA	2	Ace(2)	Ace	ASPQL	ASPQLCR	R	100	N.D.	N.D.						N.D.				2	8	P25325	THTM_HUMAN	3-mercaptopyruvate sulfurtransferase		Ace|R<C13N15>(1), Ace|R(1)	56	437.216	2
	-	M	L	NatC or other	9	AcD3C13(9)	AcD3C13	MLMPK	MLMPKKNR	R	2	3	1						0.91034	-0.135523	-0.465251		1	8	P46783	RS10_HUMAN	40S ribosomal protein S10	Q9NQ39 (1-8)	AcD3C13|R(5), AcD3C13|R<C13N15>(4)	49	595.837	2
	M	A	D	NatA	7	Ace(7)	Ace	ADIQT	ADIQTER	R	100	100	0						0.954296	-0.0674917	-0.297931		2	8	P62280	RS11_HUMAN	40S ribosomal protein S11		Ace|R<C13N15>(3), Ace|R(4)	65	437.718	2
	M	A	E	NatA	6	Ace(6)	Ace	AEVEQ	AEVEQKKKR	R<C13N15>	100	100	0						0.86043	-0.21687	-0.665324		2	10	P62841	RS15_HUMAN	40S ribosomal protein S15		Ace|R<C13N15>(3), Ace|R(3)	70	654.894	2
	M	P	S	none	10	AcD3C13(10)	AcD3C13	PSKGP	PSKGPLQSVQVFGR	R	0	0	0						0.875718	-0.191462	-0.602832		2	15	P62249	RS16_HUMAN	40S ribosomal protein S16		AcD3C13|R<C13N15>(5), AcD3C13|R(5)	102	797.456	2
	-	M	P	none	4	AcD3C13(4)	AcD3C13	MPGVT	MPGVTVKDVNQQEFVR	R<C13N15>	0	0	0						0.831855	-0.265596	-0.785164		1	16	P39019	RS19_HUMAN	40S ribosomal protein S19		AcD3C13|R<C13N15>(2), AcD3C13|R(2)	96	984.016	2
	M	P	G	none	8	AcD3C13(8)	AcD3C13	PGVTV	PGVTVKDVNQQEFVR	R<C13N15>	0	0	0						0.938696	-0.0912705	-0.356414		2	16	P39019	RS19_HUMAN	40S ribosomal protein S19		AcD3C13|R(4), AcD3C13|R<C13N15>(4)	121	910.497	2
	M	A	D	NatA	2	Ace(2)	Ace	ADDAG	ADDAGAAGGPGGPGGPGMGNR	R<C13N15>	100	100	0						0.72853	-0.45694	-1.25577		2	22	P15880	RS2_HUMAN	40S ribosomal protein S2		Ace|R<C13N15>(1), Ace|R(1)	83	903.889	2
	-	M	Q	NatB or other	14	Ace(14)	Ace	MQNDA	MQNDAGEFVDLYVPR	R	100	100	0						0.856871	-0.22285	-0.680032		1	15	P63220	RS21_HUMAN	40S ribosomal protein S21		Ace|R(6), Ace|R<C13N15>(8)	111	906.417	2
	-	M	N	NatB or other	10	Ace(10)	Ace	MNDTV	MNDTVTIR	R<C13N15>	100	100	0						0.865408	-0.208548	-0.644855		1	8	P62847	RS24_HUMAN	40S ribosomal protein S24		Ace|R(5), Ace|R<C13N15>(5)	58	509.249	2
	M	A	V	NatA	14	Ace(14)	Ace	AVQIS	AVQISKKR	R	100	100	0						0.845004	-0.242969	-0.729514		2	9	P23396	RS3_HUMAN	40S ribosomal protein S3		Ace|R(7), Ace|R<C13N15>(7)	65	533.339	2
	M	A	V	NatA	6	AcD3C13(6)	AcD3C13	AVGKN	AVGKNKR	R<C13N15>	0	0	0						0.917431	-0.124328	-0.437719		2	8	P61247	RS3A_HUMAN	40S ribosomal protein S3a		AcD3C13|R(4), AcD3C13|R<C13N15>(2)	58	462.301	2
	-	M	E	NatB	7	Ace(7)	Ace	MELQP	MELQPPEASIAVVSIPR	R<C13N15>	100	100	0						1.36423	0.44809	0.970132		1	17	P08195	4F2_HUMAN	4F2 cell-surface antigen heavy chain		Ace|R(4), Ace|R<C13N15>(3)	65	953.005	2
	-	M	S	other	2	AcD3C13(2)	AcD3C13	MSTGT	MSTGTFVVSQPLNYR	R	0	0	0						1.31843	0.398821	0.848956		1	15	P49189	AL9A1_HUMAN	4-trimethylaminobutyraldehyde dehydrogenase		AcD3C13|R(1), AcD3C13|R<C13N15>(1)	84	881.943	2
	M	S	T	NatA	6	Ace(6)	Ace	STGTF	STGTFVVSQPLNYR	R	97	98	1						1.0456	0.064331	0.0262847		2	15	P49189	AL9A1_HUMAN	4-trimethylaminobutyraldehyde dehydrogenase		Ace|R<C13N15>(3), Ace|R(3)	102	805.913	2
	M	G	V	NatA	2	AcD3C13(2)	AcD3C13	GVPKF	GVPKFYR	R<C13N15>	0	0	0						1.08347	0.115659	0.152525		2	8	Q8IZH2	XRN1_HUMAN	5'-3' exoribonuclease 1		AcD3C13|R(1), AcD3C13|R<C13N15>(1)	37	485.788	2
	M	G	V	NatA	2	AcD3C13(2)	AcD3C13	GVPAF	GVPAFFR	R<C13N15>	0	0	0						0.98749	-0.018162	-0.176605		2	8	Q9H0D6	XRN2_HUMAN	5'-3' exoribonuclease 2		AcD3C13|R(1), AcD3C13|R<C13N15>(1)	45	425.743	2
	M	A	A	NatA	10	Ace(10)	Ace	AAAAV	AAAAVSSAKR	R<C13N15>	100	100	0						0.895917	-0.158563	-0.521918		2	11	P49914	MTHFS_HUMAN	5-formyltetrahydrofolate cyclo-ligase		Ace|R(4), Ace|R<C13N15>(6)	74	515.797	2
	-	M	E	NatB	7	Ace(7)	Ace	MEYMA	MEYMAESTDR	R<C13N15>	100	100	0						0.759363	-0.397138	-1.10869		1	10	Q96D46	NMD3_HUMAN	60S ribosomal export protein NMD3		Ace|R<C13N15>(4), Ace|R(3)	75	658.754	2
	M	S	S	NatA	2	Ace(2)	Ace	SSKVS	SSKVSR	R	100	100	0						0.72604	-0.461879	-1.26792		2	7	P62906	RL10A_HUMAN	60S ribosomal protein L10a		Ace|R(1), Ace|R<C13N15>(1)	47	376.716	2
	-	M	A	other	1	Ace(1)	Ace	MAQDQ	MAQDQGEKENPMR	R<C13N15>	100	100	0						0.721541	-0.470846	-1.28997		1	13	P62913	RL11_HUMAN	60S ribosomal protein L11		Ace|R<C13N15>(1)	38	832.866	2
	M	A	Q	NatA	21	Ace(21)	Ace	AQDQG	AQDQGEKENPMR	R	94	100	6	√				√	0.765294	-0.385914	-1.08108		2	13	P62913	RL11_HUMAN	60S ribosomal protein L11		Ace|R<C13N15>(10), Ace|R(11)	81	754.344	2
	M	A	E	NatA	10	Ace(9), AcD3C13(1)	Ace	AEVQV	AEVQVLVLDGR	R<C13N15>	69	98	29	√	√	√	√	√	0.707493	-0.499213	-1.35974		2	12	P40429	RL13A_HUMAN	60S ribosomal protein L13a		Ace|R<C13N15>(6), AcD3C13|R(1), Ace|R(3)	75	625.853	2
	-	M	K	other	13	AcD3C13(13)	AcD3C13	MKASG	MKASGTLR	R<C13N15>	2	2	0						0.726935	-0.460102	-1.26355		1	8	Q02543	RL18A_HUMAN	60S ribosomal protein L18a		AcD3C13|R<C13N15>(8), AcD3C13|R(5)	57	492.28	2
	-	M	T	other	14	AcD3C13(11), Ace(3)	AcD3C13	MTNTK	MTNTKGKR	R	9	10	1						0.731526	-0.451019	-1.24121		1	8	P46778	RL21_HUMAN	60S ribosomal protein L21		AcD3C13|R(6), AcD3C13|R<C13N15>(5), Ace|R(3)	70	546.81	2
	M	T	N	NatA	7	AcD3C13(7)	AcD3C13	TNTKG	TNTKGKR	R	0	0	0						0.74666	-0.421477	-1.16855		2	8	P46778	RL21_HUMAN	60S ribosomal protein L21		AcD3C13|R(5), AcD3C13|R<C13N15>(2)	59	473.292	2
	M	A	P	none	1	AcD3C13(1)	AcD3C13	APQKD	APQKDR	R	0	0	0						0.26455	-1.91839	-4.85017	99% siCTR	2	7	Q6P5R6	RL22L_HUMAN	60S ribosomal protein L22-like 1		AcD3C13|R(1)	42	404.735	2
	-	M	K	other	9	AcD3C13(9)	AcD3C13	MKFNP	MKFNPFVTSDR	R	0	0	0						0.780029	-0.358401	-1.01341		1	11	P61254	RL26_HUMAN	60S ribosomal protein L26	Q9UNX3 (1-11)	AcD3C13|R<C13N15>(5), AcD3C13|R(4)	69	726.368	2
	M	V	A	NatA	13	AcD3C13(13)	AcD3C13	VAAKK	VAAKKTKKSLESINSR	R	0	0	0						0.744942	-0.4248	-1.17672		2	17	P62888	RL30_HUMAN	60S ribosomal protein L30		AcD3C13|R(13)	89	998.114	2
	-	M	A	other	2	Ace(2)	Ace	MAPAK	MAPAKKGGEKKKGR	R	100	100	0						0.62109	-0.687126	-1.82191		1	14	P62899	RL31_HUMAN	60S ribosomal protein L31		Ace|R<C13N15>(1), Ace|R(1)	33	593.689	3
	M	A	P	none	2	AcD3C13(2)	AcD3C13	APAKK	APAKKGGEKKKGR	R	0	0	0						0.677935	-0.560781	-1.51117		2	14	P62899	RL31_HUMAN	60S ribosomal protein L31		AcD3C13|R(2)	42	819.026	2
	M	A	K	NatA	5	AcD3C13(4), Ace(1)	AcD3C13	AKIKA	AKIKAR	R<C13N15>	5	14	9						N.D.				2	7	P42766	RL35_HUMAN	60S ribosomal protein L35		AcD3C13|R(2), AcD3C13|R<C13N15>(2), Ace|R<C13N15>(1)	43	419.295	2
	-	M	V	other	1	AcD3C13(1)	AcD3C13	MVNVP	MVNVPKTR	R<C13N15>	0	0	0						0.48186	-1.05331	-2.72254	99% siCTR	1	8	P83881	RL36A_HUMAN	60S ribosomal protein L36a	Q969Q0 (1-8)	AcD3C13|R<C13N15>(1)	38	532.809	2
	M	V	N	NatA	3	AcD3C13(3)	AcD3C13	VNVPK	VNVPKTR	R	0	0	0						0.735803	-0.442608	-1.22052		2	8	P83881	RL36A_HUMAN	60S ribosomal protein L36a	Q969Q0 (2-8)	AcD3C13|R(2), AcD3C13|R<C13N15>(1)	40	454.287	2
	-	M	T	other	3	Ace(2), AcD3C13(1)	Ace	MTKGT	MTKGTSSFGKR	R	62	61	-1						1.00216	0.00311286	-0.12428		1	11	P61927	RL37_HUMAN	60S ribosomal protein L37		Ace|R(1), AcD3C13|R(1), Ace|R<C13N15>(1)	58	676.352	2
	M	T	K	NatA	11	AcD3C13(11)	AcD3C13	TKGTS	TKGTSSFGKR	R	0	0	0						0.741532	-0.431419	-1.193		2	11	P61927	RL37_HUMAN	60S ribosomal protein L37		AcD3C13|R<C13N15>(4), AcD3C13|R(7)	73	605.348	2
	-	M	E	NatB	5	Ace(5)	Ace	MEGVE	MEGVEEKKKEVPAVPETLKKKR	R	100	100	0						0.743918	-0.426784	-1.1816		1	22	P18124	RL7_HUMAN	60S ribosomal protein L7		Ace|R<C13N15>(1), Ace|R(4)	62	965.227	3
	M	S	G	NatA	1	Ace(1)	Ace	SGASS	SGASSSEQNNNSYETKTPNLR	R	100	100	0						0.95835	-0.0613755	-0.282888		2	22	O60825	F262_HUMAN	6-phosphofructo-2-kinase/fructose-2,6-bisphosphatase 2		Ace|R(1)	73	791.702	3
	M	P	L	none	1	AcD3C13(1)	AcD3C13	PLELT	PLELTQSR	R	0	0	0						1.05723	0.0802878	0.06553		2	9	Q16875	F263_HUMAN	6-phosphofructo-2-kinase/fructose-2,6-bisphosphatase 3		AcD3C13|R(1)	40	495.782	2
	M	A	A	NatA	7	Ace(6), AcD3C13(1)	Ace	AAVDL	AAVDLEKLR	R<C13N15>	89	100	11	√					1.02529	0.0360283	-0.0433253		2	10	P17858	K6PL_HUMAN	6-phosphofructokinase, liver type		Ace|R<C13N15>(2), Ace|R(4), AcD3C13|R(1)	70	557.328	2
	M	A	A	NatA	1	Ace(1)	Ace	AAKSQ	AAKSQPNIPKAKSLDGVTNDR	R	66	86	20	√					1.73554	0.795382	1.82429		2	22	Q9UBM7	DHCR7_HUMAN	7-dehydrocholesterol reductase		Ace|R(1)	65	798.441	3
	M	A	E	NatA	6	Ace(6)	Ace	AELQM	AELQMLLEEEIPSGKR	R<C13N15>	100	100	0						1.26493	0.339054	0.701959		2	17	Q8IZP0	ABI1_HUMAN	Abl interactor 1		Ace|R(3), Ace|R<C13N15>(3)	83	979.511	2
	M	A	E	NatA	1	Ace(1)	Ace	AELQM	AELQMLLEEEIPGGR	R<C13N15>	100	100	0						1.06108	0.0855334	0.0784315		2	16	Q9NYB9	ABI2_HUMAN	Abl interactor 2		Ace|R<C13N15>(1)	33	876.94	2
	-	M	N	NatB or other	7	Ace(7)	Ace	MNAGS	MNAGSDPVVIVSAAR	R<C13N15>	100	100	0						0.868793	-0.202916	-0.631003		1	15	Q9BWD1	THIC_HUMAN	Acetyl-CoA acetyltransferase, cytosolic		Ace|R<C13N15>(4), Ace|R(3)	115	777.895	2
	-	M	E	NatB	18	Ace(18)	Ace	MEMKK	MEMKKKINLELR	R<C13N15>	100	100	0						1.18735	0.247748	0.477395		1	12	Q9BTT0	AN32E_HUMAN	Acidic leucine-rich nuclear phosphoprotein 32 family member E		Ace|R(12), Ace|R<C13N15>(6)	72	879.495	2
	-	M	E	NatB	2	Ace(2)	Ace	MEELI	MEELIVELR	R	100	100	0						1.1831	0.24257	0.46466		1	9	Q8N556	AFAP1_HUMAN	Actin filament-associated protein 1		Ace|R(1), Ace|R<C13N15>(1)	64	595.31	2
	-	M	D	NatB	2	Ace(2)	Ace	MDDDI	MDDDIAALVVDNGSGMCKAGFAGDDAPR	R	100	100	0						3.10646	1.63527	3.88998	99% siNatA	1	28	P60709	ACTB_HUMAN	Actin, cytoplasmic 1		Ace|R(2)	76	997.104	3
	M	D	D	NatH	172	Ace(172)	Ace	DDDIA	DDDIAALVVDNGSGMCKAGFAGDDAPR	R	100	100	0						1.20795	0.272566	0.538433		2	28	P60709	ACTB_HUMAN	Actin, cytoplasmic 1		Ace|R(101), Ace|R<C13N15>(71)	142	1421.63	2
	M	E	E	NatH	92	Ace(92)	Ace	EEEIA	EEEIAALVIDNGSGMCKAGFAGDDAPR	R	N.D.	100	N.D.						N.D.				2	28	P63261	ACTG_HUMAN	Actin, cytoplasmic 2		Ace|R(56), Ace|R<C13N15>(36)	147	1449.67	2
	-	M	N	NatB or other	2	Ace(2)	Ace	MNTSI	MNTSIPYQQNPYNPR	R	100	100	0						1.07774	0.108009	0.13371		1	15	O94929	ABLM3_HUMAN	Actin-binding LIM protein 3		Ace|R(1), Ace|R<C13N15>(1)	60	940.934	2
	-	M	D	NatB	4	Ace(4)	Ace	MDPFT	MDPFTEKLLER	R	100	100	0						1.00009	0.000129837	-0.131617		1	11	Q9NQW6	ANLN_HUMAN	Actin-binding protein anillin		Ace|R<C13N15>(2), Ace|R(2)	72	742.376	2
	R	M	Q	NatB or other	1	Ace(1)	Ace	MQKLA	MQKLAEQR	R<C13N15>	N.D.	N.D.	N.D.						N.D.				146	153	Q9NQW6	ANLN_HUMAN	Actin-binding protein anillin		Ace|R<C13N15>(1)	40	559.796	2
	-	M	I	NatC or other	4	AcD3C13(4)	AcD3C13	MILLE	MILLEVNNR	R	0	0	0						1.21375	0.279467	0.555408		1	9	O15144	ARPC2_HUMAN	Actin-related protein 2/3 complex subunit 2		AcD3C13|R(3), AcD3C13|R<C13N15>(1)	80	582.823	2
	M	S	K	NatA	6	Ace(6)	Ace	SKNTV	SKNTVSSAR	R<C13N15>	100	100	0						1.64414	0.717336	1.63234		2	10	O15511	ARPC5_HUMAN	Actin-related protein 2/3 complex subunit 5		Ace|R<C13N15>(3), Ace|R(3)	55	524.784	2
	M	A	A	NatA	1	Ace(1)	Ace	AANVF	AANVFPFR	R	100	100	2.12771e-07						0.94931	-0.0750488	-0.316517		2	9	Q9H9F9	ARP5_HUMAN	Actin-related protein 5		Ace|R(1)	38	482.256	2
	-	M	K	other	2	AcD3C13(2)	AcD3C13	MKVVP	MKVVPEKNAVR	R<C13N15>	0	0	0						1.72889	0.789846	1.81067		1	11	Q9C0C7	AMRA1_HUMAN	Activating molecule in BECN1-regulated autophagy protein 1		AcD3C13|R(1), AcD3C13|R<C13N15>(1)	40	719.425	2
	-	M	D	NatB	5	Ace(5)	Ace	MDSLE	MDSLEEPQKKVFKAR	R	100	100	0						0.882284	-0.180685	-0.576327		1	15	Q6VMQ6	MCAF1_HUMAN	Activating transcription factor 7-interacting protein 1		Ace|R<C13N15>(2), Ace|R(3)	73	1003.04	2
	-	M	F	NatC or other	3	Ace(3)	Ace	MFQLP	MFQLPVNNLGSLR	R<C13N15>	100	100	0						1.48521	0.57067	1.27162		1	13	Q9H2P0	ADNP_HUMAN	Activity-dependent neuroprotector homeobox protein		Ace|R(2), Ace|R<C13N15>(1)	55	778.911	2
	M	A	L	NatA	3	Ace(2), AcD3C13(1)	AcD3C13	ALQAD	ALQADFDR	R	73	100	27	√					1.38044	0.465131	1.01204		2	9	Q8N6N7	ACBD7_HUMAN	Acyl-CoA-binding domain-containing protein 7		Ace|R<C13N15>(1), Ace|R(1), AcD3C13|R(1)	61	491.751	2
	M	S	Q	NatA	53	Ace(53)	Ace	SQAEF	SQAEFEKAAEEVR	R<C13N15>	92.8672	100	7.13277	√					1.27952	0.355601	0.742656		2	14	P07108	ACBP_HUMAN	Acyl-CoA-binding protein		Ace|R(31), Ace|R<C13N15>(22)	112	796.893	2
	M	A	A	NatA	2	AcD3C13(2)	AcD3C13	AATLI	AATLILEPAGR	R	12	17	5						1.82524	0.868083	2.0031		2	11	Q86TX2	ACOT1_HUMAN	Acyl-coenzyme A thioesterase 1	P49753 (64-74)	AcD3C13|R(1), AcD3C13|R<C13N15>(1)	60	579.846	2
	-	M	T	other	1	Ace(1)	Ace	MTSMT	MTSMTQSLR	R<C13N15>	N.D.	N.D.	N.D.						N.D.				1	9	Q9NPJ3	ACO13_HUMAN	Acyl-coenzyme A thioesterase 13		Ace|R<C13N15>(1)	31	569.759	2
	M	T	S	NatA	1	Ace(1)	Ace	TSMTQ	TSMTQSLR	R<C13N15>	100	100	0						1.06669	0.093141	0.0971421		2	9	Q9NPJ3	ACO13_HUMAN	Acyl-coenzyme A thioesterase 13		Ace|R<C13N15>(1)	39	496.241	2
	M	S	T	NatA	1	Ace(1)	Ace	STAQS	STAQSLKSVDYEVFGR	R<C13N15>	N.D.	N.D.	N.D.						N.D.				2	17	P14621	ACYP2_HUMAN	Acylphosphatase-2		Ace|R<C13N15>(1)	62	943.48	2
	M	G	I	NatA	1	AcD3C13(1)	AcD3C13	GIMAA	GIMAASR	R	0	0	0						1.06811	0.0950602	0.101862		2	8	Q6P587	FAHD1_HUMAN	Acylpyruvase FAHD1, mitochondrial		AcD3C13|R(1)	57	384.705	2
	M	A	G	NatA	3	Ace(3)	Ace	AGNFD	AGNFDSEER	R	97	100	3						0.81827	-0.289351	-0.843589		2	10	P46108	CRK_HUMAN	Adapter molecule crk		Ace|R<C13N15>(1), Ace|R(2)	35	533.725	2
	M	A	D	NatA	7	Ace(7)	Ace	ADSEL	ADSELQLVEQR	R<C13N15>	100	100	0						0.80335	-0.315899	-0.908884		2	12	P07741	APT_HUMAN	Adenine phosphoribosyltransferase		Ace|R<C13N15>(4), Ace|R(3)	75	670.341	2
	M	A	A	NatA	4	Ace(4)	Ace	AAAEE	AAAEEEPKPKKLKVEAPQALR	R	76	100	24	√					1.09327	0.128649	0.184473		2	22	P55263	ADK_HUMAN	Adenosine kinase		Ace|R(3), Ace|R<C13N15>(1)	69	845.16	3
	-	M	A	other	6	Ace(6)	Ace	MAPSV	MAPSVPAAEPEYPKGIR	R<C13N15>	100	100	0						0.782353	-0.354108	-1.00286		1	17	P54819	KAD2_HUMAN	Adenylate kinase 2, mitochondrial		Ace|R(3), Ace|R<C13N15>(3)	75	964.495	2
	M	A	P	none	7	AcD3C13(7)	AcD3C13	APSVP	APSVPAAEPEYPKGIR	R	0	0	0						1.20425	0.26814	0.527549		2	17	P54819	KAD2_HUMAN	Adenylate kinase 2, mitochondrial		AcD3C13|R(4), AcD3C13|R<C13N15>(3)	73	888.486	2
	M	A	S	NatA	2	Ace(2)	Ace	ASKLL	ASKLLR	R<C13N15>	100	100	0						1.28348	0.360061	0.753626		2	7	P27144	KAD4_HUMAN	Adenylate kinase 4, mitochondrial	P11172 (240-245)	Ace|R<C13N15>(1), Ace|R(1)	38	393.757	2
	M	A	D	NatA	11	Ace(11)	Ace	ADMQN	ADMQNLVER	R	100	100	0						1.11678	0.15935	0.259982		2	10	Q01518	CAP1_HUMAN	Adenylyl cyclase-associated protein 1		Ace|R(6), Ace|R<C13N15>(5)	59	567.267	2
	M	A	N	NatA	2	Ace(2)	Ace	ANMQG	ANMQGLVER	R	91	100	9	√					0.700804	-0.512918	-1.39345		2	10	P40123	CAP2_HUMAN	Adenylyl cyclase-associated protein 2		Ace|R<C13N15>(1), Ace|R(1)	61	538.264	2
	M	S	E	NatA	1	Ace(1)	Ace	SEADG	SEADGLR	R	97	100	3						1.33998	0.422211	0.906484		2	8	Q9HDC9	APMAP_HUMAN	Adipocyte plasma membrane-associated protein		Ace|R(1)	40	395.19	2
	M	A	A	NatA	8	Ace(8)	Ace	AAEPN	AAEPNKTEIQTLFKR	R	100	100	0						0.98138	-0.0271162	-0.198628		2	16	Q8N6H7	ARFG2_HUMAN	ADP-ribosylation factor GTPase-activating protein 2		Ace|R(5), Ace|R<C13N15>(3)	73	941.523	2
	M	G	D	NatA	2	Ace(2)	Ace	GDPSK	GDPSKQDILTIFKR	R<C13N15>	100	100	0						0.54998	-0.862549	-2.25336		2	15	Q9NP61	ARFG3_HUMAN	ADP-ribosylation factor GTPase-activating protein 3		Ace|R(1), Ace|R<C13N15>(1)	69	882.497	2
	-	M	E	NatB	5	Ace(5)	Ace	MEPAM	MEPAMEPETLEAR	R	100	100	0						0.937255	-0.0934865	-0.361864		1	13	Q9UJY5	GGA1_HUMAN	ADP-ribosylation factor-binding protein GGA1		Ace|R(2), Ace|R<C13N15>(3)	80	789.345	2
	M	G	L	NatA	2	AcD3C13(2)	AcD3C13	GLLSI	GLLSILR	R<C13N15>	0	0	0						1.48381	0.569306	1.26826		2	8	P36405	ARL3_HUMAN	ADP-ribosylation factor-like protein 3		AcD3C13|R<C13N15>(1), AcD3C13|R(1)	41	414.78	2
	-	M	L	NatC or other	2	Ace(2)	Ace	MLALI	MLALISR	R	100	100	0						1.08199	0.113687	0.147675		1	7	Q9NVJ2	ARL8B_HUMAN	ADP-ribosylation factor-like protein 8B		Ace|R<C13N15>(1), Ace|R(1)	53	431.247	2
	-	M	E	NatB	1	Ace(1)	Ace	MEPDI	MEPDIIR	R	100	100	0						1.30735	0.386645	0.81901		1	7	Q6ULP2	AFTIN_HUMAN	Aftiphilin		Ace|R(1)	33	466.231	2
	-	M	A	other	3	Ace(3)	Ace	MADII	MADIIAR	R	100	100	0						0.92273	-0.11602	-0.417284		1	7	O00170	AIP_HUMAN	AH receptor-interacting protein		Ace|R(2), Ace|R<C13N15>(1)	47	424.221	2
	M	A	C	NatA	1	Ace(1)	Ace	ACGAT	ACGATLKR	R	≥95	≥98	N.D.						N.D.				2	9	Q53H80	AKIR2_HUMAN	Akirin-2	Q9H9L7 (2-9)	Ace|R(1)	39	483.263	2
	-	M	D	NatB	15	Ace(15)	Ace	MDSTL	MDSTLTASEIR	R<C13N15>	100	100	0						0.961058	-0.0573039	-0.272874		1	11	P49588	SYAC_HUMAN	Alanine--tRNA ligase, cytoplasmic		Ace|R<C13N15>(8), Ace|R(7)	113	646.308	2
	M	A	T	NatA	3	Ace(3)	Ace	ATANG	ATANGAVENGQPDR	R	96	100	4						0.73427	-0.445617	-1.22792		2	15	P47895	AL1A3_HUMAN	Aldehyde dehydrogenase family 1 member A3		Ace|R<C13N15>(1), Ace|R(2)	94	721.337	2
	M	A	A	NatA	3	Ace(3)	Ace	AASVE	AASVEQR	R	100	100	0						1.03363	0.0477152	-0.0145816		2	8	Q96IU4	ABHEB_HUMAN	Alpha/beta hydrolase domain-containing protein 14B		Ace|R<C13N15>(1), Ace|R(2)	62	401.707	2
	M	A	A	NatA	2	Ace(2)	Ace	AAAAA	AAAAAETPEVLR	R<C13N15>	100	100	0					√	0.93828	-0.0919096	-0.357986		2	13	Q9NXW9	ALKB4_HUMAN	Alpha-ketoglutarate-dependent dioxygenase alkB homolog 4		Ace|R<C13N15>(1), Ace|R(1)	44	625.834	2
	M	A	G	NatA	2	Ace(2)	Ace	AGTGL	AGTGLLALR	R	80	100	20	√					2.62714	1.39349	3.29533	99% siNatA	2	10	Q9BT30	ALKB7_HUMAN	Alpha-ketoglutarate-dependent dioxygenase alkB homolog 7, mitochondrial		Ace|R(1), Ace|R<C13N15>(1)	64	457.277	2
	-	M	D	NatB	8	Ace(8)	Ace	MDNSG	MDNSGKEAEAMALLAEAER	R	100	100	0						1.41238	0.498131	1.09321		1	19	P54920	SNAA_HUMAN	Alpha-soluble NSF attachment protein		Ace|R(4), Ace|R<C13N15>(4)	110	1078.99	2
	-	M	E	NatB	1	Ace(1)	Ace	MEFPF	MEFPFDVDALFPER	R	100	100	0						1.31519	0.395274	0.840232		1	14	Q5SQI0	ATAT_HUMAN	Alpha-tubulin N-acetyltransferase		Ace|R(1)	30	885.906	2
	-	M	E	NatB	1	Ace(1)	Ace	MELEE	MELEELGIR	R	100	100	0						1.58769	0.666929	1.50836		1	9	Q06203	PUR1_HUMAN	Amidophosphoribosyltransferase		Ace|R(1)	64	574.287	2
	M	A	N	NatA	4	Ace(4)	Ace	ANNDA	ANNDAVLKR	R	93	100	7	√					0.970933	-0.0425567	-0.236603		2	10	Q12904	AIMP1_HUMAN	Aminoacyl tRNA synthase complex-interacting multifunctional protein 1		Ace|R<C13N15>(1), Ace|R(3)	70	545.304	2
	-	M	D	NatB	2	Ace(2)	Ace	MDFPT	MDFPTISR	R<C13N15>	100	100	0						1.15191	0.204028	0.369866		1	8	O96018	APBA3_HUMAN	Amyloid beta A4 precursor protein-binding family A member 3		Ace|R<C13N15>(1), Ace|R(1)	44	517.746	2
	M	T	T	NatA	2	Ace(2)	Ace	TTPNK	TTPNKTPPGADPKQLER	R	100	100	0						0.7951	-0.330792	-0.945511		2	18	Q9UM13	APC10_HUMAN	Anaphase-promoting complex subunit 10		Ace|R(2)	45	993.534	2
	M	S	T	NatA	2	Ace(2)	Ace	STLFP	STLFPSLFPR	R	100	100	0						1.02605	0.037101	-0.0406869		2	11	P60006	APC15_HUMAN	Anaphase-promoting complex subunit 15		Ace|R<C13N15>(1), Ace|R(1)	51	603.83	2
	M	A	A	NatA	1	Ace(1)	Ace	AASSS	AASSSSSSAGGVSGSSVTGSGFSVSDLAPPR	R	100	100	0						0.77782	-0.362492	-1.02348		2	32	Q96DE5	APC16_HUMAN	Anaphase-promoting complex subunit 16		Ace|R(1)	75	933.441	3
	-	M	E	NatB	1	Ace(1)	Ace	MELPS	MELPSGPGPER	R<C13N15>	100	100	0						1.15489	0.207755	0.379034		1	11	Q9Y679	AUP1_HUMAN	Ancient ubiquitous protein 1		Ace|R<C13N15>(1)	37	619.292	2
	R	M	D	NatB	2	Ace(2)	Ace	MDAAI	MDAAIKR	R<C13N15>	100	100	0						1.12726	0.17282	0.293112		850	856	Q02763	TIE2_HUMAN	Angiopoietin-1 receptor		Ace|R(1), Ace|R<C13N15>(1)	62	460.248	2
	-	M	K	other	2	Ace(2)	Ace	MKSLK	MKSLKAKFR	R<C13N15>	100	100	0						0.74908	-0.416808	-1.15707		1	9	Q9P0K7	RAI14_HUMAN	Ankycorbin		Ace|R<C13N15>(1), Ace|R(1)	60	659.398	2
	-	M	D	NatB	2	Ace(2)	Ace	MDTSD	MDTSDLFASCR	R	100	100	0						1.41593	0.501749	1.10211		1	11	Q969K4	ABTB1_HUMAN	Ankyrin repeat and BTB/POZ domain-containing protein 1		Ace|R(1), Ace|R<C13N15>(1)	51	680.779	2
	-	M	L	NatC or other	2	Ace(2)	Ace	MLTDS	MLTDSGGGGTSFEEDLDSVAPR	R	100	100	0						0.838895	-0.253438	-0.755261		1	22	Q8IWZ3	ANKH1_HUMAN	Ankyrin repeat and KH domain-containing protein 1		Ace|R(2)	64	1150.01	2
	M	G	K	NatA	2	AcD3C13(2)	AcD3C13	GKEQE	GKEQELLEAAR	R<C13N15>	0	0	0						1.10909	0.149376	0.235452		2	12	Q92625	ANS1A_HUMAN	Ankyrin repeat and SAM domain-containing protein 1A		AcD3C13|R(1), AcD3C13|R<C13N15>(1)	62	674.377	2
	-	M	D	NatB	3	Ace(3)	Ace	MDGKQ	MDGKQGGMDGSKPAGPR	R	100	100	0						2.51745	1.33196	3.144	99% siNatA	1	17	Q96DX5	ASB9_HUMAN	Ankyrin repeat and SOCS box protein 9		Ace|R(2), Ace|R<C13N15>(1)	55	619.624	3
	-	M	T	other	1	Ace(1)	Ace	MTGEK	MTGEKIR	R<C13N15>	100	100	0						0.92182	-0.117443	-0.420785		1	7	Q8N6S4	AN13C_HUMAN	Ankyrin repeat domain-containing protein 13C		Ace|R<C13N15>(1)	43	475.254	2
	-	M	E	NatB	1	Ace(1)	Ace	MEKAT	MEKATVPVAAATAAEGEGSPPAVAAVAGPPAAAEVGGGVGGSSR	R<C13N15>	100	100	0						0.96118	-0.0571213	-0.272425		1	44	O75179	ANR17_HUMAN	Ankyrin repeat domain-containing protein 17		Ace|R<C13N15>(1)	41	997.755	4
	-	M	D	NatB	1	Ace(1)	Ace	MDDKE	MDDKEPKR	R	100	100	0						0.945423	-0.0809688	-0.331077		1	8	Q5JPF3	AN36C_HUMAN	Ankyrin repeat domain-containing protein 36C		Ace|R(1)	38	585.792	2
	-	M	N	NatB or other	2	Ace(2)	Ace	MNALL	MNALLEQKEQQER	R	100	100	0						0.9525	-0.070209	-0.304614		1	13	Q6AI12	ANR40_HUMAN	Ankyrin repeat domain-containing protein 40		Ace|R<C13N15>(1), Ace|R(1)	104	861.428	2
	M	A	T	NatA	5	Ace(5)	Ace	ATKGG	ATKGGTVKAASGFNAMEDAQTLR	R	100	100	0						1.49803	0.583068	1.30211		2	24	P09525	ANXA4_HUMAN	Annexin A4		Ace|R(3), Ace|R<C13N15>(2)	116	1238.63	2
	M	P	A	none	3	AcD3C13(3)	AcD3C13	PAVSK	PAVSKGDGMR	R	0	0	0						1.14794	0.199047	0.357616		2	11	O94973	AP2A2_HUMAN	AP-2 complex subunit alpha-2	O95782 (2-11)	AcD3C13|R<C13N15>(2), AcD3C13|R(1)	65	564.296	2
	-	M	K	other	2	Ace(2)	Ace	MKKFF	MKKFFDSR	R	100	100	0						1.06481	0.090596	0.0908829		1	8	Q2M2I8	AAK1_HUMAN	AP2-associated protein kinase 1		Ace|R(1), Ace|R<C13N15>(1)	61	605.815	2
	M	A	L	NatA	4	Ace(4)	Ace	ALKMV	ALKMVKGSIDR	R<C13N15>	100	100	0						1.07164	0.0998203	0.11357		2	12	O14617	AP3D1_HUMAN	AP-3 complex subunit delta-1		Ace|R<C13N15>(2), Ace|R(2)	74	690.399	2
	M	P	T	none	6	AcD3C13(6)	AcD3C13	PTVEE	PTVEELYR	R<C13N15>	0	0	0						0.984372	-0.0227245	-0.187826		2	9	Q9BZZ5	API5_HUMAN	Apoptosis inhibitor 5		AcD3C13|R<C13N15>(2), AcD3C13|R(4)	71	532.286	2
	M	S	G	NatA	1	Ace(1)	Ace	SGGFE	SGGFELQPR	R<C13N15>	100	100	0						0.5948	-0.749523	-1.97537		2	10	Q8IW19	APLF_HUMAN	Aprataxin and PNK-like factor		Ace|R<C13N15>(1)	43	521.763	2
	M	A	Q	NatA	2	Ace(2)	Ace	AQESP	AQESPKNSAAEIPVTSNGEVDDSR	R<C13N15>	100	100	0						0.640275	-0.643236	-1.71396		2	25	P53367	ARFP1_HUMAN	Arfaptin-1		Ace|R(1), Ace|R<C13N15>(1)	73	867.415	3
	-	M	K	other	1	AcD3C13(1)	AcD3C13	MKMTV	MKMTVDFEECLKDSPR	R	0	0	0						0.98302	-0.0247073	-0.192703		1	16	Q15057	ACAP2_HUMAN	Arf-GAP with coiled-coil, ANK repeat and PH domain-containing protein 2		AcD3C13|R(1)	33	720.342	3
	-	M	N	NatB or other	2	Ace(2)	Ace	MNYQQ	MNYQQQLANSAAIR	R	100	100	0						1.14357	0.193545	0.344083		1	14	Q9UPQ3	AGAP1_HUMAN	Arf-GAP with GTPase, ANK repeat and PH domain-containing protein 1		Ace|R(1), Ace|R<C13N15>(1)	115	833.404	2
	-	M	D	NatB	7	Ace(7)	Ace	MDVLV	MDVLVSECSAR	R	100	100	0						0.93509	-0.0968229	-0.37007		1	11	P54136	SYRC_HUMAN	Arginine--tRNA ligase, cytoplasmic		Ace|R(4), Ace|R<C13N15>(3)	99	662.798	2
	-	M	M	other	2	Ace(2)	Ace	MMDPC	MMDPCSVGVQLR	R<C13N15>	100	100	0		√				0.67116	-0.575271	-1.5468		1	12	Q8N8R7	AL14E_HUMAN	ARL14 effector protein		Ace|R<C13N15>(1), Ace|R(1)	68	738.83	2
	-	M	N	NatB or other	4	Ace(4)	Ace	MNSST	MNSSTSTMSEEPDALSVVNQLR	R	100	100	0						0.838705	-0.253765	-0.756065		1	22	Q9NVT9	ARMC1_HUMAN	Armadillo repeat-containing protein 1		Ace|R<C13N15>(2), Ace|R(2)	105	1235.56	2
	M	A	C	NatA	2	Ace(2)	Ace	ACLLE	ACLLETPIR	R	100	100	0						0.64984	-0.621844	-1.66135		2	10	Q8IUR7	ARMC8_HUMAN	Armadillo repeat-containing protein 8		Ace|R<C13N15>(1), Ace|R(1)	68	557.8	2
	-	M	N	NatB or other	2	Ace(2)	Ace	MNSSS	MNSSSANITYASR	R<C13N15>	100	100	0						0.75588	-0.403771	-1.125		1	13	P35869	AHR_HUMAN	Aryl hydrocarbon receptor		Ace|R(1), Ace|R<C13N15>(1)	96	735.332	2
	-	M	D	NatB	2	Ace(2)	Ace	MDIEA	MDIEAYLER	R<C13N15>	100	100	0						1.24353	0.314441	0.641426		1	9	P18440	ARY1_HUMAN	Arylamine N-acetyltransferase 1		Ace|R(1), Ace|R<C13N15>(1)	92	604.281	2
	M	V	L	NatA	3	AcD3C13(3)	AcD3C13	VLAEL	VLAELYVSDR	R	0	0	0						0.8536	-0.228368	-0.693602		2	11	O43776	SYNC_HUMAN	Asparagine--tRNA ligase, cytoplasmic		AcD3C13|R<C13N15>(1), AcD3C13|R(2)	94	606.335	2
	-	M	L	NatC or other	6	Ace(6)	Ace	MLKPQ	MLKPQPLQQPSQPQQPPPTQQAVAR	R<C13N15>	100	100	0						0.80688	-0.309574	-0.893327		1	25	Q8WWM7	ATX2L_HUMAN	Ataxin-2-like protein		Ace|R(3), Ace|R<C13N15>(3)	66	970.183	3
	M	A	S	NatA	1	Ace(1)	Ace	ASSET	ASSETEIR	R	100	100	0						1.325	0.405992	0.866593		2	9	Q7Z591	AKNA_HUMAN	AT-hook-containing transcription factor		Ace|R(1)	37	467.727	2
	-	M	L	NatC or other	1	Ace(1)	Ace	MLGFV	MLGFVGR	R<C13N15>	100	100	0						N.D.				1	7	P06576	ATPB_HUMAN	ATP synthase subunit beta, mitochondrial		Ace|R<C13N15>(1)	36	424.222	2
	M	A	D	NatA	1	Ace(1)	Ace	ADKLT	ADKLTR	R	100	100	0						0.81282	-0.298992	-0.867301		2	7	P61221	ABCE1_HUMAN	ATP-binding cassette sub-family E member 1	P51816 (1263-1268)	Ace|R(1)	43	396.732	2
	M	P	S	none	2	AcD3C13(2)	AcD3C13	PSDLA	PSDLAKKKAAKKKEAAKAR	R	0	0	0						0.89716	-0.156563	-0.516999		2	20	Q9UG63	ABCF2_HUMAN	ATP-binding cassette sub-family F member 2		AcD3C13|R(2)	47	806.185	3
	M	A	T	NatA	2	Ace(2)	Ace	ATCAE	ATCAEILR	R	100	100	0						0.89162	-0.165499	-0.538978		2	9	Q9NUQ8	ABCF3_HUMAN	ATP-binding cassette sub-family F member 3		Ace|R<C13N15>(1), Ace|R(1)	70	488.25	2
	-	M	K	other	2	AcD3C13(2)	AcD3C13	MKLKD	MKLKDTKSR	R	0	0	0						1.44257	0.528641	1.16825		1	9	Q9GZR7	DDX24_HUMAN	ATP-dependent RNA helicase DDX24		AcD3C13|R(1), AcD3C13|R<C13N15>(1)	52	655.891	2
	M	A	L	NatA	1	Ace(1)	Ace	ALFYV	ALFYVAR	R<C13N15>	75	91	16	√					0.672084	-0.573287	-1.54192		2	8	Q8N8A6	DDX51_HUMAN	ATP-dependent RNA helicase DDX51		Ace|R<C13N15>(1)	39	446.252	2
	M	A	A	NatA	2	AcD3C13(2)	AcD3C13	AADKG	AADKGPAAGPR	R<C13N15>	9	28	19	√				√	0.5336	-0.906169	-2.36064		2	12	Q8TDD1	DDX54_HUMAN	ATP-dependent RNA helicase DDX54		AcD3C13|R<C13N15>(1), AcD3C13|R(1)	70	557.813	2
	M	A	A	NatA	1	Ace(1)	Ace	AAQVA	AAQVAPAAASSLGNPPPPPPSELKKAEQQQR	R	100	100	0						1.12189	0.165931	0.276168		2	32	O14497	ARI1A_HUMAN	AT-rich interactive domain-containing protein 1A		Ace|R(1)	85	1091.25	3
	M	A	N	NatA	1	Ace(1)	Ace	ANSTG	ANSTGKAPPDER	R	N.D.	N.D.	N.D.						N.D.				2	13	Q68CP9	ARID2_HUMAN	AT-rich interactive domain-containing protein 2		Ace|R(1)	58	666.331	2
	M	A	G	NatA	2	AcD3C13(1), Ace(1)	Ace	AGTSA	AGTSAPGSKR	R	61	98	37	√					0.834104	-0.261701	-0.775584		2	11	Q8WXE1	ATRIP_HUMAN	ATR-interacting protein		AcD3C13|R(1), Ace|R(1)	41	510.775	2
	-	M	T	other	4	Ace(4)	Ace	MTDDK	MTDDKDVLR	R<C13N15>	100	100	0						0.84434	-0.244104	-0.732305		1	9	Q9H1Y0	ATG5_HUMAN	Autophagy protein 5		Ace|R<C13N15>(2), Ace|R(2)	69	604.296	2
	M	T	D	NatA	3	Ace(3)	Ace	TDDKD	TDDKDVLR	R	100	100	0						1.08678	0.120055	0.163338		2	9	Q9H1Y0	ATG5_HUMAN	Autophagy protein 5		Ace|R(1), Ace|R<C13N15>(2)	58	525.774	2
	-	M	E	NatB	2	Ace(2)	Ace	METDL	METDLNSQDR	R<C13N15>	100	100	0						0.9699	-0.0440921	-0.24038		1	10	O75143	ATG13_HUMAN	Autophagy-related protein 13		Ace|R(1), Ace|R<C13N15>(1)	72	638.771	2
	M	A	Q	NatA	1	Ace(1)	Ace	AQFDT	AQFDTEYQR	R<C13N15>	81	100	19	√					1.70569	0.770352	1.76273		2	10	Q7Z3C6	ATG9A_HUMAN	Autophagy-related protein 9A		Ace|R<C13N15>(1)	41	605.275	2
	M	A	Q	NatA	3	Ace(3)	Ace	AQAKI	AQAKINAKANEGR	R<C13N15>	100	100	0						0.707767	-0.498654	-1.35837		2	14	O95816	BAG2_HUMAN	BAG family molecular chaperone regulator 2		Ace|R(2), Ace|R<C13N15>(1)	105	758.924	2
	-	M	D	NatB	2	Ace(2)	Ace	MDLIL	MDLILNR	R	100	100	0						1.33157	0.413128	0.884144		1	7	Q8IWZ6	BBS7_HUMAN	Bardet-Biedl syndrome 7 protein		Ace|R<C13N15>(1), Ace|R(1)	64	466.747	2
	-	M	N	NatB or other	12	Ace(12)	Ace	MNNQK	MNNQKQQKPTLSGQR	R	100	100	0						0.679306	-0.557866	-1.504		1	15	Q7L1Q6	BZW1_HUMAN	Basic leucine zipper and W2 domain-containing protein 1		Ace|R(7), Ace|R<C13N15>(5)	88	955.497	2
	-	M	N	NatB or other	2	Ace(1), AcD3C13(1)	Ace	MNIFD	MNIFDR	R	74	70	-4						2.69955	1.43272	3.39181	99% siNatA	1	6	P55061	BI1_HUMAN	Bax inhibitor 1		Ace|R(1), AcD3C13|R(1)	59	427.197	2
	-	M	F	NatC or other	4	Ace(4)	Ace	MFQIP	MFQIPEFEPSEQEDSSSAER	R	100	100	0						1.25327	0.325692	0.669095		1	20	Q92934	BAD_HUMAN	Bcl2 antagonist of cell death		Ace|R(2), Ace|R<C13N15>(2)	94	1201.01	2
	M	A	S	NatA	2	Ace(2)	Ace	ASGQG	ASGQGPGPPR	R<C13N15>	92	100	8	√					1.69816	0.76397	1.74703		2	11	Q16611	BAK_HUMAN	Bcl-2 homologous antagonist/killer		Ace|R(1), Ace|R<C13N15>(1)	57	488.247	2
	M	A	T	NatA	1	Ace(1)	Ace	ATPAS	ATPASAPDTR	R	100	100	0						0.86386	-0.211131	-0.651207		2	11	Q92843	B2CL2_HUMAN	Bcl-2-like protein 2		Ace|R(1)	36	514.753	2
	M	A	S	NatA	2	Ace(2)	Ace	ASPSG	ASPSGKGAR	R<C13N15>	100	100	0						0.6446	-0.633524	-1.69007		2	10	Q6ZNE5	BAKOR_HUMAN	Beclin 1-associated autophagy-related key regulator		Ace|R<C13N15>(1), Ace|R(1)	75	465.255	2
	-	M	D	NatB	2	Ace(2)	Ace	MDIIF	MDIIFGR	R	100	100	0						1.23586	0.305515	0.619472		1	7	Q9HAY6	BCDO1_HUMAN	Beta,beta-carotene 15,15'-monooxygenase		Ace|R(1), Ace|R<C13N15>(1)	57	455.229	2
	M	G	E	NatA	2	Ace(2)	Ace	GEKPG	GEKPGTR	R	100	100	0						0.67913	-0.55824	-1.50492		2	8	P32121	ARRB2_HUMAN	Beta-arrestin-2		Ace|R<C13N15>(1), Ace|R(1)	42	417.227	2
	-	M	D	NatB	3	Ace(3)	Ace	MDVGE	MDVGELLSYQPNR	R	100	100	0						1.09255	0.127695	0.182127		1	13	Q8WYA6	CTBL1_HUMAN	Beta-catenin-like protein 1		Ace|R<C13N15>(1), Ace|R(2)	107	790.375	2
	R	M	K	other	1	Ace(1)	Ace	MKKDE	MKKDESFLGKLGGTLAR	R<C13N15>	66	73	7						1.50903	0.593617	1.32805		15	31	Q9HBI1	PARVB_HUMAN	Beta-parvin		Ace|R<C13N15>(1)	32	687.384	3
	-	M	D	NatB	4	Ace(4)	Ace	MDCEV	MDCEVNNGSSLR	R<C13N15>	100	100	0						1.11059	0.151326	0.240248		1	12	P55957	BID_HUMAN	BH3-interacting domain death agonist		Ace|R(2), Ace|R<C13N15>(2)	84	725.302	2
	-	M	D	NatB	4	Ace(4)	Ace	MDGLQ	MDGLQASAGPLR	R<C13N15>	100	100	0						1.53221	0.615614	1.38215		1	12	Q9H6W3	NO66_HUMAN	Bifunctional lysine-specific demethylase and histidyl-hydroxylase NO66		Ace|R(2), Ace|R<C13N15>(2)	88	642.318	2
	M	V	Q	NatA	8	AcD3C13(8)	AcD3C13	VQKES	VQKESQATLEER	R	0	4	4						1.04379	0.0618315	0.0201371		2	13	O60502	NCOAT_HUMAN	Bifunctional protein NCOAT		AcD3C13|R(4), AcD3C13|R<C13N15>(4)	100	756.404	2
	M	A	A	NatA	3	Ace(3)	Ace	AAAAE	AAAAEGVLATR	R<C13N15>	100	100	0						0.72784	-0.458307	-1.25913		2	12	Q6QNY1	BL1S2_HUMAN	Biogenesis of lysosome-related organelles complex 1 subunit 2		Ace|R<C13N15>(2), Ace|R(1)	88	541.297	2
	M	S	K	NatA	2	Ace(2)	Ace	SKYKL	SKYKLIMLR	R	93	100	7	√					1.361	0.444669	0.961718		2	10	P07738	PMGE_HUMAN	Bisphosphoglycerate mutase		Ace|R(1), Ace|R<C13N15>(1)	58	652.391	2
	M	A	A	NatA	2	Ace(2)	Ace	AAVPQ	AAVPQNNLQEQLER	R<C13N15>	100	100	0						1.25631	0.329192	0.677706		2	15	P54132	BLM_HUMAN	Bloom syndrome protein		Ace|R<C13N15>(1), Ace|R(1)	75	831.428	2
	-	M	E	NatB	16	Ace(16)	Ace	MELSA	MELSAEYLR	R<C13N15>	100	100	0						0.903595	-0.146252	-0.491639		1	9	Q9H3K6	BOLA2_HUMAN	BolA-like protein 2		Ace|R(8), Ace|R<C13N15>(8)	75	590.283	2
	R	M	F	NatC or other	2	Ace(2)	Ace	MFATQ	MFATQTEGELR	R<C13N15>	N.D.	98	N.D.						1.19188	0.253241	0.490906		25	35	Q53S33	BOLA3_HUMAN	BolA-like protein 3		Ace|R(1), Ace|R<C13N15>(1)	75	675.816	2
	-	M	S	other	3	Ace(2), AcD3C13(1)	Ace	MSPEV	MSPEVALNR	R	94	85	-9						1.28496	0.361725	0.757719		1	9	Q9NXR7	BRE_HUMAN	BRCA1-A complex subunit BRE		Ace|R(1), Ace|R<C13N15>(1), AcD3C13|R<C13N15>(1)	79	537.766	2
	M	S	V	NatA	2	Ace(2)	Ace	SVSLV	SVSLVVIR	R	100	100	0						1.06635	0.092681	0.0960109		2	9	Q7Z569	BRAP_HUMAN	BRCA1-associated protein		Ace|R(1), Ace|R<C13N15>(1)	48	457.787	2
	M	A	A	NatA	2	Ace(2)	Ace	AAGKF	AAGKFASLPR	R	100	100	0						0.62709	-0.673256	-1.78779		2	11	O75815	BCAR3_HUMAN	Breast cancer anti-estrogen resistance protein 3		Ace|R<C13N15>(1), Ace|R(1)	55	553.819	2
	-	M	D	NatB	2	Ace(2)	Ace	MDLSA	MDLSALR	R<C13N15>	100	100	0						1.11421	0.156021	0.251795		1	7	P38398	BRCA1_HUMAN	Breast cancer type 1 susceptibility protein		Ace|R<C13N15>(1), Ace|R(1)	59	437.222	2
	-	M	N	NatB or other	1	Ace(1)	Ace	MNEAM	MNEAMATDSPR	R	100	100	0						1.58566	0.665083	1.50382		1	11	Q9H6U6	BCAS3_HUMAN	Breast carcinoma-amplified sequence 3		Ace|R(1)	45	648.763	2
	-	M	Y	NatC or other	3	Ace(3)	Ace	MYEGK	MYEGKKTKNMFLTR	R	89	94	5						0.971583	-0.0415905	-0.234227		1	14	Q9Y6D6	BIG1_HUMAN	Brefeldin A-inhibited guanine nucleotide-exchange protein 1		Ace|R<C13N15>(1), Ace|R(2)	66	981.51	2
	-	M	Q	NatB or other	6	Ace(6)	Ace	MQESQ	MQESQTKSMFVSR	R	100	100	0						0.955733	-0.06532	-0.292589		1	13	Q9Y6D5	BIG2_HUMAN	Brefeldin A-inhibited guanine nucleotide-exchange protein 2		Ace|R<C13N15>(3), Ace|R(3)	65	840.39	2
	-	M	E	NatB	2	Ace(2)	Ace	MEEIL	MEEILR	R<C13N15>	100	100	0						1.25607	0.328917	0.677028		1	6	Q5TH69	BIG3_HUMAN	Brefeldin A-inhibited guanine nucleotide-exchange protein 3	Q5R372 (59-64)	Ace|R(1), Ace|R<C13N15>(1)	44	429.717	2
	M	A	L	NatA	1	Ace(1)	Ace	ALADS	ALADSTR	R	≥94	100	N.D.						0.46853	-1.09379	-2.82208	99% siCTR	2	8	Q96CX2	KCD12_HUMAN	BTB/POZ domain-containing protein KCTD12		Ace|R(1)	39	388.201	2
	R	M	E	NatB	3	Ace(3)	Ace	MEAGE	MEAGEAAPPAGAGGR	R<C13N15>	100	100	0						2.07227	1.05121	2.4535		10	24	Q8N5Z5	KCD17_HUMAN	BTB/POZ domain-containing protein KCTD17		Ace|R(2), Ace|R<C13N15>(1)	74	705.321	2
	M	A	E	NatA	1	Ace(1)	Ace	AELQL	AELQLDPAMAGLGGGGGSGVGDGGGPVR	R	100	100	0						2.81933	1.49535	3.54585	99% siNatA	2	29	Q14681	KCTD2_HUMAN	BTB/POZ domain-containing protein KCTD2		Ace|R(1)	36	837.402	3
	M	A	A	NatA	1	Ace(1)	Ace	AAAPP	AAAPPLSKAEYLKR	R	100	100	0						1.1253	0.17031	0.286937		2	15	Q9BRD0	BUD13_HUMAN	BUD13 homolog		Ace|R(1)	45	825.981	2
	M	P	K	none	4	AcD3C13(4)	AcD3C13	PKFKA	PKFKAAR	R	0	0	0						0.913375	-0.130721	-0.453441		2	8	Q13895	BYST_HUMAN	Bystin		AcD3C13|R(2), AcD3C13|R<C13N15>(2)	46	479.81	2
	-	M	A	other	4	Ace(4)	Ace	MAPAE	MAPAEILNGKEISAQIR	R	95	91	-4						0.78924	-0.341464	-0.97176		1	17	P11586	C1TC_HUMAN	C-1-tetrahydrofolate synthase, cytoplasmic		Ace|R(2), Ace|R<C13N15>(2)	99	973.523	2
	M	A	P	none	8	AcD3C13(8)	AcD3C13	APAEI	APAEILNGKEISAQIR	R	0	0	0						1.09741	0.134104	0.19789		2	17	P11586	C1TC_HUMAN	C-1-tetrahydrofolate synthase, cytoplasmic		AcD3C13|R(6), AcD3C13|R<C13N15>(2)	107	902.517	2
	M	A	A	NatA	1	Ace(1)	Ace	AALGG	AALGGDGLR	R<C13N15>	N.D.	100	N.D.						N.D.				2	10	Q9Y256	FACE2_HUMAN	CAAX prenyl protease 2		Ace|R<C13N15>(1)	53	441.239	2
	M	A	A	NatA	6	Ace(5), AcD3C13(1)	Ace	AALVL	AALVLEDGSVLR	R<C13N15>	93	100	7	√					0.802955	-0.31661	-0.910631		2	13	P27708	PYR1_HUMAN	CAD protein		Ace|R<C13N15>(2), Ace|R(3), AcD3C13|R(1)	87	647.866	2
	-	M	E	NatB	7	Ace(7)	Ace	MEMPL	MEMPLPPDDQELR	R<C13N15>	100	100	0						1.02988	0.0424742	-0.0274716		1	13	Q8IWX8	CHERP_HUMAN	Calcium homeostasis endoplasmic reticulum protein		Ace|R(4), Ace|R<C13N15>(3)	57	827.87	2
	-	M	E	NatB	2	Ace(2)	Ace	MEGGP	MEGGPAVCCQDPR	R<C13N15>	100	100	0						1.1026	0.14091	0.214628		1	13	Q8N5S9	KKCC1_HUMAN	Calcium/calmodulin-dependent protein kinase kinase 1		Ace|R(1), Ace|R<C13N15>(1)	59	772.812	2
	M	S	S	NatA	1	Ace(1)	Ace	SSCVS	SSCVSSQPSSNR	R<C13N15>	100	100	-5.14536e-07						0.99343	-0.00950978	-0.155325		2	13	Q96RR4	KKCC2_HUMAN	Calcium/calmodulin-dependent protein kinase kinase 2		Ace|R<C13N15>(1)	46	674.295	2
	M	A	T	NatA	2	Ace(2)	Ace	ATTAT	ATTATCTR	R	100	100	0						1.431	0.517024	1.13967		2	9	Q13555	KCC2G_HUMAN	Calcium/calmodulin-dependent protein kinase type II subunit gamma		Ace|R(1), Ace|R<C13N15>(1)	52	462.216	2
	-	M	E	NatB	2	Ace(2)	Ace	MEESP	MEESPLSR	R<C13N15>	100	100	0						0.49963	-1.00107	-2.59404	99% siCTR	1	8	Q9P1Z2	CACO1_HUMAN	Calcium-binding and coiled-coil domain-containing protein 1		Ace|R<C13N15>(1), Ace|R(1)	57	508.733	2
	M	S	E	NatA	1	Ace(1)	Ace	SEEII	SEEIITPVYCTGVSAQVQKQR	R<C13N15>	100	100	0						1.15228	0.204491	0.371006		2	22	P07384	CAN1_HUMAN	Calpain-1 catalytic subunit		Ace|R<C13N15>(1)	94	1246.64	2
	M	A	G	NatA	16	Ace(15), AcD3C13(1)	Ace	AGIAA	AGIAAKLAKDR	R<C13N15>	100	100	0						0.966206	-0.0495971	-0.253919		2	12	P17655	CAN2_HUMAN	Calpain-2 catalytic subunit		Ace|R<C13N15>(7), Ace|R(8), AcD3C13|R(1)	83	630.386	2
	-	M	D	NatB	3	Ace(3)	Ace	MDATA	MDATALER	R<C13N15>	100	100	0						0.633777	-0.657954	-1.75016		1	8	Q9Y6W3	CAN7_HUMAN	Calpain-7		Ace|R<C13N15>(1), Ace|R(2)	68	487.728	2
	M	S	S	NatA	7	Ace(7)	Ace	SSTQF	SSTQFNKGPSYGLSAEVKNR	R<C13N15>	100	100	0						1.04388	0.06195	0.0204285		2	21	Q99439	CNN2_HUMAN	Calponin-2		Ace|R(4), Ace|R<C13N15>(3)	100	1158.59	2
	-	M	E	NatB	2	Ace(2)	Ace	MEAPG	MEAPGLAQAAAAESDSR	R	100	100	0						1.05397	0.0758338	0.0545755		1	17	P51817	PRKX_HUMAN	cAMP-dependent protein kinase catalytic subunit PRKX		Ace|R(1), Ace|R<C13N15>(1)	118	866.894	2
	-	M	E	NatB	9	Ace(9)	Ace	MESGS	MESGSTAASEEAR	R	100	100	0						1.11255	0.153876	0.246518		1	13	P10644	KAP0_HUMAN	cAMP-dependent protein kinase type I-alpha regulatory subunit		Ace|R(5), Ace|R<C13N15>(4)	114	692.288	2
	-	M	K	other	2	AcD3C13(2)	AcD3C13	MKPAL	MKPALLEVMR	R	0	0	0						1.14315	0.193015	0.342779		1	10	Q9NPF2	CHSTB_HUMAN	Carbohydrate sulfotransferase 11		AcD3C13|R(2)	35	657.367	2
	-	M	D	NatB	3	Ace(3)	Ace	MDKVC	MDKVCAVFGGSR	R	100	100	0						1.35673	0.440134	0.950563		1	12	Q8N4T8	CBR4_HUMAN	Carbonyl reductase family member 4		Ace|R(2), Ace|R<C13N15>(1)	68	716.339	2
	-	M	D	NatB	1	Ace(1)	Ace	MDSSA	MDSSAVITQISKEEAR	R	100	100	0						1.29624	0.374333	0.788728		1	16	Q9GZU7	CTDS1_HUMAN	Carboxy-terminal domain RNA polymerase II polypeptide A small phosphatase 1		Ace|R(1)	112	935.464	2
	M	S	G	NatA	1	Ace(1)	Ace	SGPVP	SGPVPSR	R<C13N15>	100	100	0						0.92231	-0.116676	-0.418899		2	8	P68400	CSK21_HUMAN	Casein kinase II subunit alpha	Q8NEV1 (2-8)	Ace|R<C13N15>(1)	50	376.202	2
	M	P	G	none	2	AcD3C13(2)	AcD3C13	PGPAA	PGPAAGSR	R	0	0	0						0.95687	-0.0636052	-0.288372		2	9	P19784	CSK22_HUMAN	Casein kinase II subunit alpha'		AcD3C13|R<C13N15>(1), AcD3C13|R(1)	64	380.209	2
	-	M	T	other	2	Ace(1), AcD3C13(1)	AcD3C13	MTGKK	MTGKKSSR	R<C13N15>	63	57	-6						0.81242	-0.299702	-0.869048		1	8	Q9H8G2	CAAP1_HUMAN	Caspase activity and apoptosis inhibitor 1		Ace|R(1), AcD3C13|R<C13N15>(1)	38	531.301	2
	M	T	G	NatA	1	AcD3C13(1)	AcD3C13	TGKKS	TGKKSSR	R	≤2	≤4	N.D.						1.43998	0.526049	1.16187		2	8	Q9H8G2	CAAP1_HUMAN	Caspase activity and apoptosis inhibitor 1		AcD3C13|R(1)	33	452.779	2
	M	A	T	NatA	1	Ace(1)	Ace	ATEST	ATESTPSEIIER	R	N.D.	N.D.	N.D.						N.D.				2	13	Q9BX69	CARD6_HUMAN	Caspase recruitment domain-containing protein 6		Ace|R(1)	45	687.841	2
	M	A	D	NatA	2	Ace(2)	Ace	ADKVL	ADKVLKEKR	R<C13N15>	100	100	0						1.57305	0.653565	1.47549		2	10	P29466	CASP1_HUMAN	Caspase-1	Q5EG05 (2-10), Q5XLA6 (2-10)	Ace|R(1), Ace|R<C13N15>(1)	50	640.399	2
	M	A	T	NatA	13	Ace(13)	Ace	ATQAD	ATQADLMELDMAMEPDR	R<C13N15>	100	100	0						1.21511	0.281091	0.5594		2	18	P35222	CTNB1_HUMAN	Catenin beta-1		Ace|R(7), Ace|R<C13N15>(6)	96	1018.93	2
	-	M	E	NatB	2	Ace(2)	Ace	MENSS	MENSSAASASSEAGSSR	R<C13N15>	100	100	0						1.41178	0.497515	1.09169		1	17	O43310	CTIF_HUMAN	CBP80/20-dependent translation initiation factor		Ace|R(1), Ace|R<C13N15>(1)	125	848.852	2
	M	S	A	NatA	1	Ace(1)	Ace	SAALF	SAALFSLDGPAR	R	100	100	0						1.28572	0.362576	0.759813		2	13	P49716	CEBPD_HUMAN	CCAAT/enhancer-binding protein delta		Ace|R(1)	69	623.826	2
	M	P	G	none	1	AcD3C13(1)	AcD3C13	PGGGA	PGGGASAASGR	R<C13N15>	0	0	0						0.730612	-0.452822	-1.24564		2	12	Q9UKZ1	CNO11_HUMAN	CCR4-NOT transcription complex subunit 11		AcD3C13|R<C13N15>(1)	65	472.742	2
	M	S	T	NatA	2	Ace(2)	Ace	STKVP	STKVPIYLKR	R	100	100	0						0.83921	-0.252896	-0.753929		2	11	O14613	BORG1_HUMAN	Cdc42 effector protein 2		Ace|R(1), Ace|R<C13N15>(1)	30	670.916	2
	M	A	Q	NatA	2	Ace(2)	Ace	AQEVS	AQEVSEYLSQNPR	R	100	100	0						1.23657	0.306344	0.62151		2	14	Q9NXV6	CARF_HUMAN	CDKN2A-interacting protein		Ace|R(1), Ace|R<C13N15>(1)	77	781.876	2
	-	M	V	other	6	Ace(6)	Ace	MVGGE	MVGGEAAAAVEELVSGVR	R	100	100	0						1.07146	0.0995735	0.112963		1	18	Q96HQ2	C2AIL_HUMAN	CDKN2AIP N-terminal-like protein		Ace|R<C13N15>(3), Ace|R(3)	115	901.952	2
	M	V	G	NatA	3	AcD3C13(3)	AcD3C13	VGGEA	VGGEAAAAVEELVSGVR	R	0	0	0						1.28381	0.360432	0.754538		2	18	Q96HQ2	C2AIL_HUMAN	CDKN2AIP N-terminal-like protein		AcD3C13|R(2), AcD3C13|R<C13N15>(1)	117	830.947	2
	M	P	L	none	1	AcD3C13(1)	AcD3C13	PLLTQ	PLLTQQIQDEDDQYSLVASLDNVR	R<C13N15>	0	0	0						0.909091	-0.137504	-0.470123		2	25	O60671	RAD1_HUMAN	Cell cycle checkpoint protein RAD1		AcD3C13|R<C13N15>(1)	40	939.81	3
	-	M	F	NatC or other	3	AcD3C13(3)	AcD3C13	MFVSD	MFVSDFR	R	0	0	0						0.539463	-0.890403	-2.32186		1	7	O75419	CDC45_HUMAN	Cell division control protein 45 homolog		AcD3C13|R<C13N15>(2), AcD3C13|R(1)	46	482.731	2
	M	S	S	NatA	4	Ace(4)	Ace	SSNEC	SSNECFKCGR	R	100	100	0						1.30396	0.3829	0.809797		2	11	P62633	CNBP_HUMAN	Cellular nucleic acid-binding protein		Ace|R(2), Ace|R<C13N15>(2)	61	667.284	2
	M	A	S	NatA	7	Ace(7)	Ace	ASNFK	ASNFKKANMASSSQR	R<C13N15>	100	100	0						1.21402	0.279794	0.556211		2	16	P41208	CETN2_HUMAN	Centrin-2		Ace|R(5), Ace|R<C13N15>(2)	66	894.947	2
	-	M	E	NatB	4	Ace(4)	Ace	MEEQP	MEEQPQMQDADEPADSGGEGR	R<C13N15>	100	100	0						1.23476	0.304225	0.616298		1	21	Q9H3R5	CENPH_HUMAN	Centromere protein H		Ace|R(2), Ace|R<C13N15>(2)	91	1180.96	2
	-	M	N	NatB or other	1	Ace(1)	Ace	MNQED	MNQEDLDPDSTTDVGDVTNTEEELIR	R	100	100	0						1.27984	0.355963	0.743548		1	26	Q9BS16	CENPK_HUMAN	Centromere protein K		Ace|R(1)	41	998.772	3
	-	M	D	NatB	2	Ace(2)	Ace	MDETV	MDETVAEFIKR	R	100	100	0						1.2807	0.356933	0.745932		1	11	Q96H22	CENPN_HUMAN	Centromere protein N		Ace|R(1), Ace|R<C13N15>(1)	78	722.361	2
	-	M	D	NatB	2	Ace(2)	Ace	MDAEL	MDAELAEVR	R	100	100	0						1.31922	0.39969	0.851092		1	9	Q6IPU0	CENPP_HUMAN	Centromere protein P		Ace|R(1), Ace|R<C13N15>(1)	90	546.256	2
	-	M	E	NatB	2	Ace(2)	Ace	MEGAG	MEGAGAGSGFR	R	100	100	0						0.88022	-0.184064	-0.584638		1	11	A8MT69	CENPX_HUMAN	Centromere protein X		Ace|R<C13N15>(1), Ace|R(1)	95	549.237	2
	M	A	T	NatA	2	Ace(2)	Ace	ATGDL	ATGDLKR	R	100	100	0						0.953955	-0.0680067	-0.299197		2	8	Q9C0F1	CEP44_HUMAN	Centrosomal protein of 44 kDa		Ace|R(1), Ace|R<C13N15>(1)	49	425.243	2
	-	M	E	NatB	6	Ace(6)	Ace	MEALL	MEALLEGIQNR	R	100	100	0						0.989547	-0.0151603	-0.169223		1	11	Q96MT8	CEP63_HUMAN	Centrosomal protein of 63 kDa		Ace|R(3), Ace|R<C13N15>(3)	99	666.335	2
	-	M	I	NatC or other	2	Ace(2)	Ace	MIDSV	MIDSVKLR	R	79	82	3						1.06655	0.0929516	0.0966764		1	8	Q5JTW2	CEP78_HUMAN	Centrosomal protein of 78 kDa		Ace|R(1), Ace|R<C13N15>(1)	47	533.799	2
	M	A	S	NatA	3	Ace(3)	Ace	ASLFK	ASLFKKKTVDDVIKEQNR	R	100	100	0						0.51321	-0.962379	-2.49889		2	19	Q9UQN3	CHM2B_HUMAN	Charged multivesicular body protein 2b		Ace|R(3)	93	1175.18	2
	M	S	V	NatA	2	Ace(2)	Ace	SVFGK	SVFGKLFGAGGGKAGKGGPTPQEAIQR	R	100	100	0						0.96302	-0.0543623	-0.265639		2	28	Q9H444	CHM4B_HUMAN	Charged multivesicular body protein 4b		Ace|R(2)	117	933.508	3
	M	S	K	NatA	2	Ace(2)	Ace	SKLGK	SKLGKFFKGGGSSKSR	R	100	100	0						0.92512	-0.112288	-0.408105		2	17	Q96CF2	CHM4C_HUMAN	Charged multivesicular body protein 4c		Ace|R<C13N15>(1), Ace|R(1)	71	634.368	3
	M	A	A	NatA	4	Ace(4)	Ace	AAAAA	AAAAAEEGMEPR	R	100	100	0						0.72857	-0.456861	-1.25557		2	13	P51788	CLCN2_HUMAN	Chloride channel protein 2		Ace|R<C13N15>(2), Ace|R(2)	104	630.78	2
	-	M	D	NatB	6	Ace(6)	Ace	MDAQC	MDAQCSAKVNAR	R	100	100	0						1.22753	0.295758	0.595475		1	12	P49585	PCY1A_HUMAN	Choline-phosphate cytidylyltransferase A		Ace|R(3), Ace|R<C13N15>(3)	114	728.337	2
	M	A	D	NatA	10	Ace(10)	Ace	ADVVV	ADVVVGKDKGGEQR	R	100	100	0						0.951586	-0.071594	-0.30802		2	15	Q9NRG0	CHRC1_HUMAN	Chromatin accessibility complex protein 1		Ace|R(6), Ace|R<C13N15>(4)	118	797.43	2
	M	A	A	NatA	1	Ace(1)	Ace	AAQSA	AAQSAPKVVLKSTTKMSLNER	R	77	100	23	√					1.04712	0.06643	0.0314469		2	22	Q9Y3Y2	CHTOP_HUMAN	Chromatin target of PRMT1 protein		Ace|R(1)	29	820.126	3
	M	G	K	NatA	1	AcD3C13(1)	AcD3C13	GKKTK	GKKTKR	R<C13N15>	0	0	0						2.11156	1.07831	2.52014		2	7	P45973	CBX5_HUMAN	Chromobox protein homolog 5	Q96DM1 (412-417)	AcD3C13|R<C13N15>(1)	21	458.316	2
	-	M	E	NatB	4	Ace(4)	Ace	MELSA	MELSAVGER	R<C13N15>	100	100	0						1.54611	0.628638	1.41419		1	9	O95503	CBX6_HUMAN	Chromobox protein homolog 6	Q9HC52 (1-9)	Ace|R(2), Ace|R<C13N15>(2)	78	530.254	2
	-	M	E	NatB	2	Ace(2)	Ace	MEAFQ	MEAFQELR	R<C13N15>	100	100	0						1.18737	0.24777	0.477448		1	8	Q96JM3	CHAP1_HUMAN	Chromosome alignment-maintaining phosphoprotein 1		Ace|R<C13N15>(1), Ace|R(1)	72	546.257	2
	M	V	Q	NatA	2	AcD3C13(2)	AcD3C13	VQIVI	VQIVISSAR	R<C13N15>	0	0	0						0.83973	-0.252003	-0.751731		2	10	P0CG13	CTF8_HUMAN	Chromosome transmission fidelity protein 8 homolog		AcD3C13|R(1), AcD3C13|R<C13N15>(1)	55	515.318	2
	-	M	K	other	2	AcD3C13(2)	AcD3C13	MKEEV	MKEEVKGIPVR	R	12	13	1						1.2137	0.279412	0.555271		1	11	O95239	KIF4A_HUMAN	Chromosome-associated kinesin KIF4A	Q2VIQ3 (1-11)	AcD3C13|R(1), AcD3C13|R<C13N15>(1)	39	721.92	2
	-	M	L	NatC or other	2	Ace(2)	Ace	MLKFK	MLKFKYGAR	R<C13N15>	100	100	0						1.17579	0.23363	0.442673		1	9	O14578	CTRO_HUMAN	Citron Rho-interacting kinase		Ace|R<C13N15>(1), Ace|R(1)	63	638.359	2
	-	M	E	NatB	8	Ace(8)	Ace	MELED	MELEDGVVYQEEPGGSGAVMSER	R<C13N15>	100	100	0						1.05615	0.0788206	0.0619215		1	23	O60271	JIP4_HUMAN	C-Jun-amino-terminal kinase-interacting protein 4		Ace|R(4), Ace|R<C13N15>(4)	116	851.705	3
	-	M	E	NatB	12	Ace(12)	Ace	MENGA	MENGAVYSPTTEEDPGPAR	R<C13N15>	100	100	0						1.03573	0.0506526	-0.00735712		1	19	Q9NX76	CKLF6_HUMAN	CKLF-like MARVEL transmembrane domain-containing protein 6		Ace|R(7), Ace|R<C13N15>(5)	108	1044.96	2
	M	A	Q	NatA	6	Ace(6)	Ace	AQILP	AQILPIR	R	100	100	0						1.02819	0.0401069	-0.0332941		2	8	Q00610	CLH1_HUMAN	Clathrin heavy chain 1		Ace|R<C13N15>(3), Ace|R(3)	51	426.77	2
	M	S	A	NatA	2	Ace(2)	Ace	SAIPA	SAIPAEESDQLLIR	R<C13N15>	100	100	0						0.9667	-0.0488599	-0.252106		2	15	Q9UKF6	CPSF3_HUMAN	Cleavage and polyadenylation specificity factor subunit 3		Ace|R(1), Ace|R<C13N15>(1)	51	797.422	2
	-	M	D	NatB	2	Ace(2)	Ace	MDVTS	MDVTSSSGGGGDPR	R<C13N15>	100	100	0						1.43014	0.516156	1.13754		1	14	Q8IY22	CMIP_HUMAN	C-Maf-inducing protein		Ace|R(1), Ace|R<C13N15>(1)	112	695.793	2
	-	M	I	NatC or other	3	AcD3C13(2), Ace(1)	AcD3C13	MIEDK	MIEDKGPR	R	15	18	3						1.11784	0.160714	0.263336		1	8	Q7Z401	MYCPP_HUMAN	C-myc promoter-binding protein		AcD3C13|R(1), AcD3C13|R<C13N15>(1), Ace|R(1)	50	528.278	2
	M	A	T	NatA	13	Ace(13)	Ace	ATKID	ATKIDKEACR	R	100	100	0						1.05397	0.0758349	0.0545783		2	11	Q14019	COTL1_HUMAN	Coactosin-like protein		Ace|R(9), Ace|R<C13N15>(4)	57	664.353	2
	-	M	L	NatC or other	7	AcD3C13(6), Ace(1)	AcD3C13	MLTKF	MLTKFETKSAR	R<C13N15>	8	7	-1						1.16156	0.216068	0.399478		1	11	P53621	COPA_HUMAN	Coatomer subunit alpha		AcD3C13|R<C13N15>(3), AcD3C13|R(3), Ace|R(1)	83	739.914	2
	M	A	A	NatA	2	Ace(2)	Ace	AAVLE	AAVLESLLR	R	100	100	0						1.18966	0.250549	0.484285		2	10	Q8IWY9	CDAN1_HUMAN	Codanin-1		Ace|R(1), Ace|R<C13N15>(1)	88	507.303	2
	M	A	S	NatA	63	Ace(63)	Ace	ASGVA	ASGVAVSDGVIKVFNDMKVR	R<C13N15>	100	100	0						1.20701	0.27144	0.535664		2	21	P23528	COF1_HUMAN	Cofilin-1		Ace|R(40), Ace|R<C13N15>(23)	137	1127.61	2
	-	M	E	NatB	2	Ace(2)	Ace	MEATT	MEATTAGVGR	R	100	100	0						0.93783	-0.0926017	-0.359688		1	10	Q8WUD4	CCD12_HUMAN	Coiled-coil domain-containing protein 12		Ace|R<C13N15>(1), Ace|R(1)	98	525.748	2
	M	P	K	none	3	AcD3C13(3)	AcD3C13	PKKFQ	PKKFQGENTKSAAAR	R	0	0	0						1.0547	0.0768373	0.0570435		2	16	Q96CT7	CC124_HUMAN	Coiled-coil domain-containing protein 124		AcD3C13|R(3)	103	911.017	2
	M	A	E	NatA	4	Ace(4)	Ace	AEVSI	AEVSIDQSKLPGVKEVCR	R	100	100	0						0.974055	-0.0379249	-0.225212		2	19	Q8IVM0	CCD50_HUMAN	Coiled-coil domain-containing protein 50		Ace|R<C13N15>(2), Ace|R(2)	94	1076.07	2
	M	A	K	NatA	2	Ace(2)	Ace	AKPAA	AKPAATAAAASEELSQVPDEELLR	R	100	100	0						0.794335	-0.332181	-0.948927		2	25	A6NKD9	CC85C_HUMAN	Coiled-coil domain-containing protein 85C		Ace|R(1), Ace|R<C13N15>(1)	90	1278.66	2
	-	M	Q	NatB or other	5	Ace(5)	Ace	MQAAL	MQAALEVTAR	R	100	100	0						1.05089	0.0716117	0.0441912		1	10	Q9BSY4	CHCH5_HUMAN	Coiled-coil-helix-coiled-coil-helix domain-containing protein 5		Ace|R(3), Ace|R<C13N15>(2)	68	574.293	2
	M	P	S	none	1	AcD3C13(1)	AcD3C13	PSVTQ	PSVTQR	R	0	0	0						1.52528	0.609075	1.36607		2	7	Q9BUK0	CHCH7_HUMAN	Coiled-coil-helix-coiled-coil-helix domain-containing protein 7		AcD3C13|R(1)	35	367.711	2
	M	A	A	NatA	2	Ace(2)	Ace	AASET	AASETVR	R	93	100	7	√					0.991825	-0.0118424	-0.161062		2	8	P38432	COIL_HUMAN	Coilin		Ace|R(1), Ace|R<C13N15>(1)	60	388.201	2
	-	M	K	other	3	Ace(2), AcD3C13(1)	Ace	MKIFQ	MKIFQR	R<C13N15>	78	81	3						1.53661	0.619751	1.39233		1	6	Q05707	COEA1_HUMAN	Collagen alpha-1(XIV) chain		Ace|R(1), Ace|R<C13N15>(1), AcD3C13|R(1)	39	469.261	2
	-	M	D	NatB	4	Ace(4)	Ace	MDVTK	MDVTKKNKR	R<C13N15>	100	100	0						1.6446	0.717737	1.63332		1	9	Q9UMD9	COHA1_HUMAN	Collagen alpha-1(XVII) chain		Ace|R(3), Ace|R<C13N15>(1)	64	664.88	2
	M	A	V	NatA	2	Ace(2)	Ace	AVPAA	AVPAALILR	R	100	100	0						0.97139	-0.0418775	-0.234933		2	10	Q9Y6G5	COMDA_HUMAN	COMM domain-containing protein 10		Ace|R(1), Ace|R<C13N15>(1)	44	483.311	2
	-	M	E	NatB	8	Ace(8)	Ace	MELSE	MELSESVQKGFQMLADPR	R<C13N15>	100	100	0						1.05214	0.0733301	0.0484177		1	18	Q9UBI1	COMD3_HUMAN	COMM domain-containing protein 3		Ace|R(4), Ace|R<C13N15>(4)	117	1099.03	2
	M	G	P	none	4	AcD3C13(4)	AcD3C13	GPPGP	GPPGPALPATMNNSSSETR	R	0	0	0						1.00532	0.00765001	-0.113121		2	20	Q15003	CND2_HUMAN	Condensin complex subunit 2		AcD3C13|R<C13N15>(2), AcD3C13|R(2)	100	973.965	2
	M	A	T	NatA	5	Ace(5)	Ace	ATAAT	ATAATSPALKR	R<C13N15>	100	100	0						0.827858	-0.272545	-0.802254		2	12	Q8WTW3	COG1_HUMAN	Conserved oligomeric Golgi complex subunit 1		Ace|R(3), Ace|R<C13N15>(2)	86	593.345	2
	M	A	E	NatA	5	Ace(5)	Ace	AEAAL	AEAALLLLPEAAAER	R<C13N15>	100	100	0						0.760222	-0.395507	-1.10468		2	16	Q96JB2	COG3_HUMAN	Conserved oligomeric Golgi complex subunit 3		Ace|R<C13N15>(3), Ace|R(2)	127	795.443	2
	M	A	D	NatA	3	Ace(3)	Ace	ADLDS	ADLDSPPKLSGVQQPSEGVGGGR	R	99.7263	99.9999	0.273551						1.06057	0.0848398	0.0767257		2	24	Q9H9E3	COG4_HUMAN	Conserved oligomeric Golgi complex subunit 4		Ace|R(2), Ace|R<C13N15>(1)	95	1170.59	2
	M	G	V	NatA	2	AcD3C13(2)	AcD3C13	GVQGF	GVQGFQEFLEKR	R<C13N15>	0	0	0						1.40213	0.48762	1.06736		2	13	Q9NX05	F120C_HUMAN	Constitutive coactivator of PPAR-gamma-like protein 2		AcD3C13|R(1), AcD3C13|R<C13N15>(1)	76	771.419	2
	-	M	D	NatB	4	Ace(4)	Ace	MDLQA	MDLQAAGAQAQGAAEPSR	R	100	100	0						1.10833	0.148388	0.23302		1	18	Q9NQ92	COPRS_HUMAN	Coordinator of PRMT5 and differentiation stimulator		Ace|R(2), Ace|R<C13N15>(2)	139	915.426	2
	M	A	S	NatA	2	Ace(2)	Ace	ASALE	ASALEQFVNSVR	R<C13N15>	94	100	6	√				√	0.983701	-0.0237079	-0.190245		2	13	Q9UNS2	CSN3_HUMAN	COP9 signalosome complex subunit 3		Ace|R<C13N15>(1), Ace|R(1)	86	686.859	2
	M	A	E	NatA	2	Ace(2)	Ace	AENLL	AENLLDGPPNPKR	R<C13N15>	100	100	0						1.40448	0.490036	1.0733		2	14	Q92793	CBP_HUMAN	CREB-binding protein		Ace|R(1), Ace|R<C13N15>(1)	51	760.409	2
	M	A	T	NatA	2	Ace(2)	Ace	ATSGA	ATSGANGPGSATASASNPR	R	100	100	0						1.03168	0.0449956	-0.0212705		2	20	Q53ET0	CRTC2_HUMAN	CREB-regulated transcription coactivator 2		Ace|R(1), Ace|R<C13N15>(1)	122	858.401	2
	M	S	N	NatA	3	Ace(3)	Ace	SNLSK	SNLSKGTGSR	R	94	100	6	√					0.803851	-0.315001	-0.906674		2	11	Q13618	CUL3_HUMAN	Cullin-3		Ace|R<C13N15>(2), Ace|R(1)	85	548.29	2
	M	A	Q	NatA	2	Ace(2)	Ace	AQKPL	AQKPLR	R	100	100	0						0.89294	-0.163365	-0.533729		2	7	Q69YN2	C19L1_HUMAN	CWF19-like protein 1	Q8NE62 (355-360)	Ace|R<C13N15>(1), Ace|R(1)	34	401.251	2
	M	A	T	NatA	2	Ace(2)	Ace	ATSMA	ATSMAAASGR	R	100	100	0						1.2606	0.334111	0.689802		2	11	Q2TBE0	C19L2_HUMAN	CWF19-like protein 2		Ace|R(1), Ace|R<C13N15>(1)	78	490.727	2
	-	M	L	NatC or other	3	Ace(2), AcD3C13(1)	Ace	MLGNS	MLGNSAPGPATR	R	89	94	5						1.70791	0.772234	1.76736		1	12	P20248	CCNA2_HUMAN	Cyclin-A2		Ace|R(1), Ace|R<C13N15>(1), AcD3C13|R(1)	88	615.301	2
	M	A	S	NatA	6	Ace(6)	Ace	ASATA	ASATAPAAAVPTLASPLEQLR	R	100	100	0						1.10465	0.143589	0.221219		2	22	O95273	CCDB1_HUMAN	Cyclin-D1-binding protein 1		Ace|R(3), Ace|R<C13N15>(3)	97	1039.07	2
	-	M	K	other	1	Ace(1)	Ace	MKKFK	MKKFKR	R<C13N15>	100	100	0						0.81868	-0.288628	-0.841812		1	6	Q00537	CDK17_HUMAN	Cyclin-dependent kinase 17		Ace|R<C13N15>(1)	37	523.821	2
	-	M	D	NatB	1	Ace(1)	Ace	MDYDF	MDYDFKAKLAAER	R	100	100	0						1.72943	0.790297	1.81178		1	13	Q9BWU1	CDK19_HUMAN	Cyclin-dependent kinase 19		Ace|R(1)	80	855.429	2
	-	M	E	NatB	2	Ace(2)	Ace	MEAKT	MEAKTLGTVTPR	R	100	100	0						0.96747	-0.0477112	-0.249281		1	12	Q9BW66	CINP_HUMAN	Cyclin-dependent kinase 2-interacting protein		Ace|R<C13N15>(1), Ace|R(1)	71	704.877	2
	-	M	E	NatB	2	Ace(2)	Ace	MEKDG	MEKDGLCR	R<C13N15>	100	100	0						0.78049	-0.357548	-1.01132		1	8	Q00534	CDK6_HUMAN	Cyclin-dependent kinase 6		Ace|R<C13N15>(1), Ace|R(1)	53	562.26	2
	M	A	L	NatA	2	Ace(2)	Ace	ALDVK	ALDVKSR	R	100	100	0						0.83689	-0.25689	-0.763752		2	8	P50613	CDK7_HUMAN	Cyclin-dependent kinase 7		Ace|R<C13N15>(1), Ace|R(1)	44	439.259	2
	-	M	E	NatB	4	Ace(4)	Ace	MEAPE	MEAPEGGGGGPAAR	R<C13N15>	100	100	0						1.47601	0.561702	1.24956		1	14	Q8N1B3	FA58A_HUMAN	Cyclin-related protein FAM58A		Ace|R(2), Ace|R<C13N15>(2)	98	662.795	2
	-	M	M	other	2	Ace(2)	Ace	MMCGA	MMCGAPSATQPATAETQHIADQVR	R<C13N15>	100	100	0						1.42757	0.513561	1.13116		1	24	P04080	CYTB_HUMAN	Cystatin-B		Ace|R(1), Ace|R<C13N15>(1)	32	885.733	3
	M	A	L	NatA	3	Ace(2), AcD3C13(1)	Ace	ALLCY	ALLCYNR	R	89.7663	100	10.2337	√					0.747577	-0.419706	-1.16419		2	8	Q9UHD1	CHRD1_HUMAN	Cysteine and histidine-rich domain-containing protein 1		Ace|R<C13N15>(1), Ace|R(1), AcD3C13|R(1)	56	476.24	2
	-	M	D	NatB	5	Ace(5)	Ace	MDAAT	MDAATLTYDTLR	R	100	100	0						1.30433	0.383313	0.810815		1	12	Q9Y4P1	ATG4B_HUMAN	Cysteine protease ATG4B		Ace|R(3), Ace|R<C13N15>(2)	116	714.838	2
	-	M	N	NatB or other	1	Ace(1)	Ace	MNSVS	MNSVSPAAAQYR	R<C13N15>	100	100	0						1.26364	0.337581	0.698338		1	12	Q86TL0	ATG4D_HUMAN	Cysteine protease ATG4D		Ace|R<C13N15>(1)	55	681.821	2
	-	M	D	NatB	2	Ace(2)	Ace	MDAFT	MDAFTGSGLKR	R	100	100	0						1.36793	0.451994	0.979735		1	11	Q9H175	CSRN2_HUMAN	Cysteine/serine-rich nuclear protein 2		Ace|R(1), Ace|R<C13N15>(1)	66	644.322	2
	M	A	D	NatA	1	Ace(1)	Ace	ADSSG	ADSSGQQGKGR	R<C13N15>	100	100	0						0.83448	-0.261051	-0.773985		2	12	P49589	SYCC_HUMAN	Cysteine--tRNA ligase, cytoplasmic		Ace|R<C13N15>(1)	49	595.293	2
	-	M	L	NatC or other	4	Ace(4)	Ace	MLNVP	MLNVPSQSFPAPR	R	100	100	0						1.08288	0.114867	0.150576		1	13	Q7L1T6	NB5R4_HUMAN	Cytochrome b5 reductase 4		Ace|R(2), Ace|R<C13N15>(2)	77	751.377	2
	M	G	L	NatA	1	AcD3C13(1)	AcD3C13	GLEDE	GLEDEQKMLTESGDPEEEEEEEEELVDPLTTVR	R	0	0	0						1.67903	0.747628	1.70684		2	34	P07919	QCR6_HUMAN	Cytochrome b-c1 complex subunit 6, mitochondrial		AcD3C13|R(1)	51	1305.6	3
	-	M	L	NatC or other	2	Ace(2)	Ace	MLSVA	MLSVASR	R	100	100	0						0.99414	-0.00847906	-0.15279		1	7	P47985	UCRI_HUMAN	Cytochrome b-c1 complex subunit Rieske, mitochondrial		Ace|R<C13N15>(1), Ace|R(1)	61	411.213	2
	-	M	F	NatC or other	3	AcD3C13(3)	AcD3C13	MFAPA	MFAPAVMR	R	3	2	-1						2.81543	1.49336	3.54094	99% siNatA	1	8	Q9P0S2	COX16_HUMAN	Cytochrome c oxidase assembly protein COX16 homolog, mitochondrial		AcD3C13|R(2), AcD3C13|R<C13N15>(1)	57	501.249	2
	M	A	E	NatA	6	Ace(6)	Ace	AEDME	AEDMETKIKNYKTAPFDSR	R	84	100	16	√				√	1.44343	0.5295	1.17036		2	20	P14854	CX6B1_HUMAN	Cytochrome c oxidase subunit 6B1		Ace|R(6)	93	1222.11	2
	-	M	E	NatB	2	Ace(2)	Ace	MEEDD	MEEDDSYVPSDLTAEER	R<C13N15>	100	100	0						1.21656	0.282807	0.563623		1	17	Q15438	CYH1_HUMAN	Cytohesin-1		Ace|R(1), Ace|R<C13N15>(1)	67	1027.42	2
	-	M	E	NatB	3	Ace(3)	Ace	MEDGV	MEDGVYEPPDLTPEER	R<C13N15>	100	100	0						0.766383	-0.383862	-1.07604		1	16	Q99418	CYH2_HUMAN	Cytohesin-2		Ace|R(2), Ace|R<C13N15>(1)	55	972.924	2
	M	S	D	NatA	2	Ace(2)	Ace	SDKSE	SDKSELKAELER	R<C13N15>	100	100	0						1.10987	0.150391	0.237947		2	13	Q13409	DC1I2_HUMAN	Cytoplasmic dynein 1 intermediate chain 2		Ace|R(1), Ace|R<C13N15>(1)	92	775.916	2
	-	M	Q	NatB or other	1	Ace(1)	Ace	MQDDL	MQDDLLMDKSKTQPQPQQQQR	R	100	100	0						1.78295	0.834263	1.91992		1	21	Q8NE35	CPEB3_HUMAN	Cytoplasmic polyadenylation element-binding protein 3		Ace|R(1)	37	904.441	3
	-	M	E	NatB	4	Ace(4)	Ace	MEAAA	MEAAAVTVTR	R	100	100	0						1.26241	0.336182	0.694897		1	10	Q8NFI3	ENASE_HUMAN	Cytosolic endo-beta-N-acetylglucosaminidase		Ace|R(2), Ace|R<C13N15>(2)	98	553.779	2
	-	M	E	NatB	2	Ace(2)	Ace	MEAAA	MEAAAEPGNLAGVR	R<C13N15>	100	100	0						0.83817	-0.254685	-0.758329		1	14	Q9Y5Y2	NUBP2_HUMAN	Cytosolic Fe-S cluster assembly factor NUBP2		Ace|R(1), Ace|R<C13N15>(1)	91	727.353	2
	M	A	A	NatA	3	Ace(3)	Ace	AALTT	AALTTLFKYIDENQDR	R	85	100	15	√					1.0768	0.106744	0.130599		2	17	Q96KP4	CNDP2_HUMAN	Cytosolic non-specific dipeptidase		Ace|R(2), Ace|R<C13N15>(1)	119	994.008	2
	-	M	K	other	4	Ace(4)	Ace	MKKAS	MKKASR	R<C13N15>	100	100	0						0.96274	-0.0547819	-0.266671		1	6	Q69YQ0	CYTSA_HUMAN	Cytospin-A		Ace|R<C13N15>(2), Ace|R(2)	43	441.756	2
	M	A	F	NatA	3	Ace(3)	Ace	AFANL	AFANLR	R<C13N15>	91.9269	100	8.07307	√					0.945404	-0.0809973	-0.331147		2	7	O43175	SERA_HUMAN	D-3-phosphoglycerate dehydrogenase		Ace|R<C13N15>(2), Ace|R(1)	50	372.208	2
	M	P	G	none	4	AcD3C13(4)	AcD3C13	PGIDK	PGIDKLPIEETLEDSPQTR	R	0	0	0						1.09801	0.134898	0.199842		2	20	Q9UKG1	DP13A_HUMAN	DCC-interacting protein 13-alpha		AcD3C13|R(2), AcD3C13|R<C13N15>(2)	129	1116.59	2
	M	P	A	none	2	AcD3C13(2)	AcD3C13	PAVDK	PAVDKLLLEEALQDSPQTR	R<C13N15>	0	0	0						0.6443	-0.634196	-1.69173		2	20	Q8NEU8	DP13B_HUMAN	DCC-interacting protein 13-beta		AcD3C13|R<C13N15>(2)	74	743.076	3
	-	M	N	NatB or other	10	Ace(10)	Ace	MNKLK	MNKLKSSQKDKVR	R	100	100	0						0.727349	-0.45928	-1.26153		1	13	Q96GG9	DCNL1_HUMAN	DCN1-like protein 1		Ace|R<C13N15>(5), Ace|R(5)	82	904.521	2
	M	P	V	none	2	AcD3C13(2)	AcD3C13	PVKKK	PVKKKR	R	0	0	0						1.33444	0.416234	0.891784		2	7	Q9BTE7	DCNL5_HUMAN	DCN1-like protein 5	Q12972 (232-237), O95171 (155-160), Q9Y6X0 (582-587)	AcD3C13|R(1), AcD3C13|R<C13N15>(1)	36	472.338	2
	M	S	V	NatA	8	Ace(8)	Ace	SVAGG	SVAGGEIR	R<C13N15>	100	100	0						1.2311	0.299942	0.605765		2	9	Q9H773	DCTP1_HUMAN	dCTP pyrophosphatase 1		Ace|R(4), Ace|R<C13N15>(4)	62	420.726	2
	-	M	K	other	2	AcD3C13(2)	AcD3C13	MKVKM	MKVKMLSR	R<C13N15>	0	0	0						0.78178	-0.355165	-1.00546		1	8	Q9NV06	DCA13_HUMAN	DDB1- and CUL4-associated factor 13		AcD3C13|R(1), AcD3C13|R<C13N15>(1)	55	588.344	2
	M	A	P	none	1	AcD3C13(1)	AcD3C13	APSSK	APSSKSER	R<C13N15>	0	0	0						1.65608	0.727772	1.658		2	9	Q66K64	DCA15_HUMAN	DDB1- and CUL4-associated factor 15		AcD3C13|R<C13N15>(1)	56	483.265	2
	-	M	P	none	4	AcD3C13(4)	AcD3C13	MPFLE	MPFLELDTNLPANR	R	0	0	0						0.828775	-0.270948	-0.798326		1	14	A6NHG4	DDTL_HUMAN	D-dopachrome decarboxylase-like protein	P30046 (1-14)	AcD3C13|R(2), AcD3C13|R<C13N15>(2)	79	847.432	2
	M	P	F	none	11	AcD3C13(11)	AcD3C13	PFLEL	PFLELDTNLPANR	R	0	0	0						1.12648	0.171821	0.290653		2	14	A6NHG4	DDTL_HUMAN	D-dopachrome decarboxylase-like protein	P30046 (2-14)	AcD3C13|R(6), AcD3C13|R<C13N15>(5)	100	773.915	2
	-	M	D	NatB	1	Ace(1)	Ace	MDDKG	MDDKGDPSNEEAPKAIKPTSKEFR	R	100	100	0						1.22113	0.288217	0.576927		1	24	Q9BTC0	DIDO1_HUMAN	Death-inducer obliterator 1		Ace|R(1)	65	979.492	3
	M	S	Q	NatA	1	Ace(1)	Ace	SQPPL	SQPPLLPASAETR	R	100	100	0						1.40488	0.490447	1.07431		2	14	Q9BZ29	DOCK9_HUMAN	Dedicator of cytokinesis protein 9		Ace|R(1)	47	704.876	2
	-	M	L	NatC or other	2	Ace(2)	Ace	MLSAV	MLSAVAR	R	100	100	0						1.24005	0.310398	0.631482		1	7	Q13268	DHRS2_HUMAN	Dehydrogenase/reductase SDR family member 2, mitochondrial		Ace|R(1), Ace|R<C13N15>(1)	40	403.216	2
	M	A	A	NatA	7	Ace(7)	Ace	AADIS	AADISESSGADCKGDPR	R<C13N15>	90	100	10	√			√		0.684344	-0.547206	-1.47778		2	18	O43583	DENR_HUMAN	Density-regulated protein		Ace|R<C13N15>(3), Ace|R(4)	106	917.909	2
	-	M	L	NatC or other	3	AcD3C13(2), Ace(1)	Ace	MLFNS	MLFNSVLR	R	30	31	1						1.71923	0.781763	1.79079		1	8	Q9NZJ0	DTL_HUMAN	Denticleless protein homolog		AcD3C13|R(1), AcD3C13|R<C13N15>(1), Ace|R(1)	61	519.276	2
	-	M	V	other	1	Ace(1)	Ace	MVTEQ	MVTEQEVDAIGQTLVDPKQPLQAR	R<C13N15>	≥91	100	N.D.		√	√			0.9505	-0.0732415	-0.312072		1	24	Q9BU89	DOHH_HUMAN	Deoxyhypusine hydroxylase		Ace|R<C13N15>(1)	42	927.816	3
	M	V	T	NatA	1	AcD3C13(1)	AcD3C13	VTEQE	VTEQEVDAIGQTLVDPKQPLQAR	R	93.4205	100	6.57947	√					1.73852	0.797856	1.83037		2	24	Q9BU89	DOHH_HUMAN	Deoxyhypusine hydroxylase		AcD3C13|R(1)	82	877.144	3
	-	M	E	NatB	2	Ace(2)	Ace	MEGSL	MEGSLER	R	100	100	0						0.97943	-0.0299857	-0.205685		1	7	P49366	DHYS_HUMAN	Deoxyhypusine synthase	Q7Z4V0 (619-625)	Ace|R(1), Ace|R<C13N15>(1)	47	440.197	2
	M	A	S	NatA	15	Ace(15)	Ace	ASGVQ	ASGVQVADEVCR	R<C13N15>	96.0483	100	3.9517						2.11042	1.07753	2.51823		2	13	P60981	DEST_HUMAN	Destrin		Ace|R(8), Ace|R<C13N15>(7)	96	671.819	2
	M	S	S	NatA	9	Ace(9)	Ace	SSTLA	SSTLAKIAEIEAEMAR	R<C13N15>	100	100	0						0.927991	-0.107817	-0.39711		2	17	Q9Y295	DRG1_HUMAN	Developmentally-regulated GTP-binding protein 1		Ace|R(5), Ace|R<C13N15>(4)	130	917.976	2
	M	A	A	NatA	3	Ace(3)	Ace	AAAAA	AAAAAAGEAR	R<C13N15>	100	100	0						1.17071	0.227384	0.427309		2	11	P09417	DHPR_HUMAN	Dihydropteridine reductase		Ace|R(2), Ace|R<C13N15>(1)	85	455.734	2
	M	S	Y	NatA	1	Ace(1)	Ace	SYQGK	SYQGKKNIPR	R<C13N15>	100	100	0						1.83417	0.875127	2.02042		2	11	Q14195	DPYL3_HUMAN	Dihydropyrimidinase-related protein 3	Q16555 (2-11)	Ace|R<C13N15>(1)	36	668.881	2
	M	A	D	NatA	3	Ace(3)	Ace	ADTQY	ADTQYILPNDIGVSSLDCR	R<C13N15>	100	100	0						0.977567	-0.032733	-0.212442		2	20	Q9NY33	DPP3_HUMAN	Dipeptidyl peptidase 3		Ace|R<C13N15>(2), Ace|R(1)	79	1095.03	2
	M	A	T	NatA	1	Ace(1)	Ace	ATTGT	ATTGTPTADR	R	100	100	0						1.13544	0.183251	0.318767		2	11	Q86TI2	DPP9_HUMAN	Dipeptidyl peptidase 9		Ace|R(1)	45	516.751	2
	-	M	M	other	3	Ace(3)	Ace	MMKLK	MMKLKSNQTR	R<C13N15>	100	100	0						1.15283	0.205176	0.372689		1	10	O95989	NUDT3_HUMAN	Diphosphoinositol polyphosphate phosphohydrolase 1		Ace|R<C13N15>(2), Ace|R(1)	48	707.872	2
	M	M	K	other	2	AcD3C13(2)	AcD3C13	MKLKS	MKLKSNQTR	R<C13N15>	2	3	1						1.09918	0.136428	0.203605		2	10	O95989	NUDT3_HUMAN	Diphosphoinositol polyphosphate phosphohydrolase 1		AcD3C13|R(1), AcD3C13|R<C13N15>(1)	79	636.867	2
	M	M	K	other	4	AcD3C13(4)	AcD3C13	MKFKP	MKFKPNQTR	R<C13N15>	3	4	1						1.07065	0.0984869	0.11029		2	10	Q9NZJ9	NUDT4_HUMAN	Diphosphoinositol polyphosphate phosphohydrolase 2		AcD3C13|R<C13N15>(2), AcD3C13|R(2)	66	658.869	2
	-	M	E	NatB	4	Ace(4)	Ace	MESMF	MESMFSSPAEAALQR	R	100	100	0						0.75747	-0.400739	-1.11755		1	15	Q9BQC3	DPH2_HUMAN	Diphthamide biosynthesis protein 2		Ace|R<C13N15>(2), Ace|R(2)	95	864.882	2
	-	M	N	NatB or other	1	Ace(1)	Ace	MNPQI	MNPQIR	R<C13N15>	100	100	0						1.67217	0.741722	1.69231		1	6	Q96AK3	ABC3D_HUMAN	DNA dC->dU-editing enzyme APOBEC-3D	Q9NRW3 (1-6), Q9UH17 (1-6)	Ace|R<C13N15>(1)	37	413.709	2
	-	M	D	NatB	1	Ace(1)	Ace	MDPGK	MDPGKDKEGVPQPSGPPAR	R<C13N15>	100	100	0						1.11123	0.152157	0.242292		1	19	P07992	ERCC1_HUMAN	DNA excision repair protein ERCC-1		Ace|R<C13N15>(1)	40	709.024	3
	-	M	L	NatC or other	1	Ace(1)	Ace	MLGFL	MLGFLSAR	R	100	100	0						1.2091	0.273934	0.541798		1	8	Q13216	ERCC8_HUMAN	DNA excision repair protein ERCC-8		Ace|R(1)	49	476.75	2
	-	M	E	NatB	5	Ace(5)	Ace	MEVTG	MEVTGDAGVPESGEIR	R	100	100	0						0.803952	-0.314819	-0.906226		1	16	O00273	DFFA_HUMAN	DNA fragmentation factor subunit alpha		Ace|R<C13N15>(3), Ace|R(2)	113	852.891	2
	-	M	L	NatC or other	3	AcD3C13(2), Ace(1)	AcD3C13	MLQKP	MLQKPKSVKLR	R	24	21	-3						1.10685	0.14646	0.228278		1	11	O76075	DFFB_HUMAN	DNA fragmentation factor subunit beta		AcD3C13|R(1), AcD3C13|R<C13N15>(1), Ace|R(1)	53	766.486	2
	M	S	F	NatA	5	Ace(5)	Ace	SFVAG	SFVAGVIR	R	100	100	0						1.11532	0.157453	0.255315		2	9	P40692	MLH1_HUMAN	DNA mismatch repair protein Mlh1		Ace|R(4), Ace|R<C13N15>(1)	48	445.758	2
	-	M	F	NatC or other	4	Ace(4)	Ace	MFSEQ	MFSEQAAQR	R<C13N15>	100	100	0						0.99426	-0.00830493	-0.152362		1	9	P49005	DPOD2_HUMAN	DNA polymerase delta subunit 2		Ace|R(2), Ace|R<C13N15>(2)	77	568.258	2
	M	A	A	NatA	2	Ace(2)	Ace	AAAAA	AAAAAAGSGTPR	R<C13N15>	93	100	7	√					0.80708	-0.309217	-0.892449		2	13	Q9NR33	DPOE4_HUMAN	DNA polymerase epsilon subunit 4		Ace|R<C13N15>(1), Ace|R(1)	75	526.772	2
	G	M	E	NatB	1	Ace(1)	Ace	MEFSG	MEFSGR	R<C13N15>	100	100	0						0.9211	-0.11857	-0.423557		1	6	P49643	PRI2_HUMAN	DNA primase large subunit	P49327 (1601-1606)	Ace|R<C13N15>(1)	37	397.672	2
	M	A	A	NatA	4	Ace(4)	Ace	AAADG	AAADGALPEAAALEQPAELPASVR	R	100	100	0						0.950815	-0.0727634	-0.310896		2	25	P23025	XPA_HUMAN	DNA repair protein complementing XP-A cells		Ace|R(2), Ace|R<C13N15>(2)	129	1180.61	2
	M	A	M	NatA	1	Ace(1)	Ace	AMQMQ	AMQMQLEANADTSVEEESFGPQPISR	R	100	100	0						1.36958	0.453734	0.984012		2	27	Q06609	RAD51_HUMAN	DNA repair protein RAD51 homolog 1		Ace|R(1)	55	980.44	3
	-	M	D	NatB	3	Ace(3)	Ace	MDLDL	MDLDLLDLNPR	R<C13N15>	100	100	0						1.08156	0.113114	0.146265		1	11	O43542	XRCC3_HUMAN	DNA repair protein XRCC3		Ace|R(2), Ace|R<C13N15>(1)	68	691.847	2
	M	S	E	NatA	1	Ace(1)	Ace	SEAYF	SEAYFR	R	100	100	0						0.94134	-0.0872122	-0.346433		2	7	Q9BRX5	PSF3_HUMAN	DNA replication complex GINS protein PSF3	Q9Y6N5 (212-217)	Ace|R(1)	39	407.69	2
	M	A	E	NatA	9	Ace(9)	Ace	AESSE	AESSESFTMASSPAQR	R	100	100	0						0.915255	-0.127754	-0.446145		2	17	P49736	MCM2_HUMAN	DNA replication licensing factor MCM2		Ace|R<C13N15>(4), Ace|R(5)	74	872.379	2
	M	A	G	NatA	14	Ace(14)	Ace	AGTVV	AGTVVLDDVELR	R	91	100	9	√					1.11415	0.155948	0.251616		2	13	P25205	MCM3_HUMAN	DNA replication licensing factor MCM3		Ace|R(7), Ace|R<C13N15>(7)	99	664.857	2
	M	S	S	NatA	3	Ace(3)	Ace	SSPAS	SSPASTPSR	R	N.D.	100	N.D.						N.D.				2	10	P33991	MCM4_HUMAN	DNA replication licensing factor MCM4		Ace|R(3)	39	466.228	2
	M	S	G	NatA	4	Ace(4)	Ace	SGFDD	SGFDDPGIFYSDSFGGDAQADEGQAR	R	100	N.D.	N.D.						N.D.				2	27	P33992	MCM5_HUMAN	DNA replication licensing factor MCM5		Ace|R(4)	133	1376.08	2
	M	G	K	NatA	2	AcD3C13(2)	AcD3C13	GKSDF	GKSDFLTPKAIANR	R	0	0	0						1.39327	0.478475	1.04486		2	15	O60870	KIN17_HUMAN	DNA/RNA-binding protein KIN17		AcD3C13|R(1), AcD3C13|R<C13N15>(1)	124	829.98	2
	-	M	K	other	2	AcD3C13(2)	AcD3C13	MKALS	MKALSPVR	R	N.D.	N.D.	N.D.						1.37111	0.455344	0.987974		1	8	Q02535	ID3_HUMAN	DNA-binding protein inhibitor ID-3		AcD3C13|R(1), AcD3C13|R<C13N15>(1)	53	506.301	2
	-	M	E	NatB	3	Ace(3)	Ace	MEEPQ	MEEPQAGDAAR	R<C13N15>	100	100	0						1.0485	0.0683269	0.0361123		1	11	O15446	RPA34_HUMAN	DNA-directed RNA polymerase I subunit RPA34		Ace|R(2), Ace|R<C13N15>(1)	87	621.769	2
	M	A	A	NatA	1	Ace(1)	Ace	AAGCS	AAGCSEAPR	R<C13N15>	23	100	77	√					1.18725	0.24762	0.47708		2	10	Q3B726	RPA43_HUMAN	DNA-directed RNA polymerase I subunit RPA43		Ace|R<C13N15>(1)	63	485.717	2
	M	P	Y	none	6	AcD3C13(6)	AcD3C13	PYANQ	PYANQPTVR	R<C13N15>	0	0	0						1.07159	0.099753	0.113404		2	10	P19387	RPB3_HUMAN	DNA-directed RNA polymerase II subunit RPB3		AcD3C13|R(3), AcD3C13|R<C13N15>(3)	88	551.797	2
	-	M	E	NatB	2	Ace(2)	Ace	MEPDG	MEPDGTYEPGFVGIR	R<C13N15>	100	100	0						1.2017	0.265077	0.520015		1	15	P36954	RPB9_HUMAN	DNA-directed RNA polymerase II subunit RPB9		Ace|R(1), Ace|R<C13N15>(1)	74	868.398	2
	M	V	K	NatA	3	AcD3C13(3)	AcD3C13	VKEQF	VKEQFR	R	0	0	0						0.8984	-0.15457	-0.512098		2	7	O14802	RPC1_HUMAN	DNA-directed RNA polymerase III subunit RPC1		AcD3C13|R(3)	35	450.765	2
	M	A	E	NatA	2	Ace(2)	Ace	AEVKV	AEVKVKVQPPDADPVEIENR	R<C13N15>	100	99.9813	-0.0187421						0.86837	-0.203618	-0.632731		2	21	Q9H1D9	RPC6_HUMAN	DNA-directed RNA polymerase III subunit RPC6		Ace|R<C13N15>(1), Ace|R(1)	54	793.763	3
	M	A	A	NatA	17	Ace(17)	Ace	AASQA	AASQAVEEMR	R<C13N15>	100	100	0						0.812669	-0.299261	-0.867961		2	11	O15160	RPAC1_HUMAN	DNA-directed RNA polymerases I and III subunit RPAC1		Ace|R<C13N15>(9), Ace|R(8)	77	580.268	2
	-	M	E	NatB	10	Ace(10)	Ace	MEEDQ	MEEDQELER	R<C13N15>	100	100	0						0.936217	-0.0950856	-0.365797		1	9	Q9Y2S0	RPAC2_HUMAN	DNA-directed RNA polymerases I and III subunit RPAC2		Ace|R<C13N15>(5), Ace|R(5)	66	623.76	2
	M	V	K	NatA	1	AcD3C13(1)	AcD3C13	VKETT	VKETTYYDVLGVKPNATQEELKKAYR	R	0	0	0						1.0314	0.044604	-0.0222337		2	27	P31689	DNJA1_HUMAN	DnaJ homolog subfamily A member 1		AcD3C13|R(1)	81	1093.6	3
	M	A	N	NatA	1	Ace(1)	Ace	ANVAD	ANVADTKLYDILGVPPGASENELKKAYR	R	100	100	0						0.90506	-0.143915	-0.485891		2	29	O60884	DNJA2_HUMAN	DnaJ homolog subfamily A member 2		Ace|R(1)	55	1072.58	3
	M	G	K	NatA	6	AcD3C13(6)	AcD3C13	GKDYY	GKDYYQTLGLAR	R<C13N15>	0	0	0						1.06942	0.0968241	0.106201		2	13	P25685	DNJB1_HUMAN	DnaJ homolog subfamily B member 1		AcD3C13|R(5), AcD3C13|R<C13N15>(1)	103	744.905	2
	M	G	K	NatA	1	AcD3C13(1)	AcD3C13	GKDYY	GKDYYCILGIEKGASDEDIKKAYR	R	0	0	0						1.78971	0.839726	1.93335		2	25	Q9UDY4	DNJB4_HUMAN	DnaJ homolog subfamily B member 4		AcD3C13|R(1)	40	1010.2	3
	-	M	V	other	1	AcD3C13(1)	AcD3C13	MVDYY	MVDYYEVLGVQR	R	0	N.D.	N.D.						0.75459	-0.406235	-1.13106		1	12	O75190	DNJB6_HUMAN	DnaJ homolog subfamily B member 6		AcD3C13|R(1)	53	767.882	2
	M	V	D	NatA	3	AcD3C13(3)	AcD3C13	VDYYE	VDYYEVLGVQR	R<C13N15>	3.76528	14.6029	10.8376	√					0.873185	-0.19564	-0.613109		2	12	O75190	DNJB6_HUMAN	DnaJ homolog subfamily B member 6		AcD3C13|R<C13N15>(1), AcD3C13|R(2)	73	699.369	2
	-	M	D	NatB	1	Ace(1)	Ace	MDAIL	MDAILNYR	R	100	100	0						3.41908	1.77361	4.23021	99% siNatA	1	8	Q9UKB3	DJC12_HUMAN	DnaJ homolog subfamily C member 12		Ace|R(1)	43	527.255	2
	-	M	L	NatC or other	8	AcD3C13(4), Ace(4)	AcD3C13	MLLLP	MLLLPSAADGR	R	41	53	12	√					0.796262	-0.328685	-0.940331		1	11	Q99543	DNJC2_HUMAN	DnaJ homolog subfamily C member 2		AcD3C13|R(2), AcD3C13|R<C13N15>(2), Ace|R(2), Ace|R<C13N15>(2)	64	603.829	2
	M	A	A	NatA	4	Ace(4)	Ace	AAAAE	AAAAECDVVMAATEPELLDDQEAKR	R<C13N15>	100	100	0						0.939542	-0.0899697	-0.353215		2	26	Q99615	DNJC7_HUMAN	DnaJ homolog subfamily C member 7		Ace|R<C13N15>(2), Ace|R(2)	70	940.108	3
	M	S	A	NatA	3	Ace(2), AcD3C13(1)	AcD3C13	SASVV	SASVVSVISR	R	34	79	45	√	√	√			1.3782	0.462783	1.00627		2	11	P61803	DAD1_HUMAN	Dolichyl-diphosphooligosaccharide--protein glycosyltransferase subunit DAD1		Ace|R<C13N15>(1), AcD3C13|R(1), Ace|R(1)	54	526.308	2
	-	M	T	other	2	AcD3C13(2)	AcD3C13	MTKFG	MTKFGFLR	R<C13N15>	0	0	0						1.39744	0.482786	1.05547		1	8	P46977	STT3A_HUMAN	Dolichyl-diphosphooligosaccharide--protein glycosyltransferase subunit STT3A		AcD3C13|R(1), AcD3C13|R<C13N15>(1)	47	560.314	2
	R	M	Q	NatB or other	1	Ace(1)	Ace	MQSTY	MQSTYNYNMR	R	100	100	0						2.38814	1.25589	2.95689	99% siNatA	99	108	O95793	STAU1_HUMAN	Double-stranded RNA-binding protein Staufen homolog 1		Ace|R(1)	27	691.279	2
	M	G	T	NatA	2	Ace(2)	Ace	GTALD	GTALDIKIKR	R<C13N15>	56	100	44	√					1.15772	0.211291	0.387729		2	11	O14972	DSCR3_HUMAN	Down syndrome critical region protein 3		Ace|R<C13N15>(1), Ace|R(1)	56	630.896	2
	M	P	S	none	7	AcD3C13(7)	AcD3C13	PSKKK	PSKKKKYNAR	R	0	0	0						1.06569	0.0917878	0.0938141		2	11	Q14919	NC2A_HUMAN	Dr1-associated corepressor		AcD3C13|R(5), AcD3C13|R<C13N15>(2)	51	727.957	2
	M	S	L	NatA	2	Ace(2)	Ace	SLNPP	SLNPPIFLKR	R<C13N15>	100	100	0						0.67097	-0.57568	-1.54781		2	11	Q8N5C7	DTWD1_HUMAN	DTW domain-containing protein 1		Ace|R(1), Ace|R<C13N15>(1)	47	642.389	2
	-	M	E	NatB	6	Ace(6)	Ace	MESQK	MESQKEAR	R<C13N15>	100	100	0						1.18459	0.244384	0.469121		1	8	Q8NBA8	DTWD2_HUMAN	DTW domain-containing protein 2		Ace|R<C13N15>(3), Ace|R(3)	57	547.262	2
	-	M	K	other	3	AcD3C13(3)	AcD3C13	MKAVV	MKAVVQR	R	2	1	-1						0.93145	-0.10245	-0.383909		1	7	Q8TEA8	DTD1_HUMAN	D-tyrosyl-tRNA(Tyr) deacylase 1		AcD3C13|R<C13N15>(1), AcD3C13|R(2)	55	471.281	2
	-	M	E	NatB	6	Ace(6)	Ace	MESPA	MESPASSQPASMPQSKGKSKR	R	100	100	0						1.29359	0.371379	0.781462		1	21	P46734	MP2K3_HUMAN	Dual specificity mitogen-activated protein kinase kinase 3		Ace|R(4), Ace|R<C13N15>(2)	102	812.071	3
	M	A	A	NatA	1	Ace(1)	Ace	AASSL	AASSLEQKLSR	R<C13N15>	≥95	≥97	N.D.						0.920716	-0.119172	-0.425036		2	12	O14733	MP2K7_HUMAN	Dual specificity mitogen-activated protein kinase kinase 7		Ace|R<C13N15>(1)	43	644.858	2
	-	M	E	NatB	2	Ace(2)	Ace	MESED	MESEDLSGR	R<C13N15>	100	100	0						1.2554	0.328147	0.675135		1	9	P33981	TTK_HUMAN	Dual specificity protein kinase TTK		Ace|R<C13N15>(1), Ace|R(1)	54	546.231	2
	-	M	L	NatC or other	3	Ace(3)	Ace	MLEAP	MLEAPGPSDGCELSNPSASR	R<C13N15>	100	100	0						0.703457	-0.507467	-1.38004		1	20	Q9UNI6	DUS12_HUMAN	Dual specificity protein phosphatase 12		Ace|R(2), Ace|R<C13N15>(1)	81	1071.97	2
	-	M	K	other	1	AcD3C13(1)	AcD3C13	MKVTS	MKVTSLDGR	R	≥4	≥4	N.D.						2.88301	1.52758	3.6251	99% siNatA	1	9	Q16690	DUS5_HUMAN	Dual specificity protein phosphatase 5		AcD3C13|R(1)	44	558.805	2
	M	A	D	NatA	1	Ace(1)	Ace	ADPKY	ADPKYADLPGIAR	R<C13N15>	100	100	0						1.08966	0.123878	0.172739		2	14	Q13561	DCTN2_HUMAN	Dynactin subunit 2		Ace|R<C13N15>(1)	44	743.399	2
	M	A	G	NatA	2	Ace(2)	Ace	AGLTD	AGLTDLQR	R	86	100	14	√				(√)	1.14863	0.199911	0.359741		2	9	O75935	DCTN3_HUMAN	Dynactin subunit 3		Ace|R<C13N15>(1), Ace|R(1)	56	458.248	2
	M	A	S	NatA	2	Ace(2)	Ace	ASLLQ	ASLLQSDR	R<C13N15>	100	100	0						1.09349	0.12894	0.185189		2	9	Q9UJW0	DCTN4_HUMAN	Dynactin subunit 4		Ace|R(1), Ace|R<C13N15>(1)	70	471.25	2
	-	M	E	NatB	4	Ace(4)	Ace	MEAGS	MEAGSVVR	R<C13N15>	100	100	0						0.76699	-0.38272	-1.07323		1	8	Q6XZF7	DNMBP_HUMAN	Dynamin-binding protein		Ace|R<C13N15>(2), Ace|R(2)	66	458.725	2
	M	A	K	NatA	3	Ace(2), AcD3C13(1)	Ace	AKATT	AKATTIKEALAR	R<C13N15>	81	100	19	√					0.908219	-0.138888	-0.473527		2	13	Q4LDG9	DNAL1_HUMAN	Dynein light chain 1, axonemal		Ace|R<C13N15>(1), Ace|R(1), AcD3C13|R(1)	96	709.931	2
	M	G	E	NatA	1	Ace(1)	Ace	GETEG	GETEGKKDEADYKR	R	89	N.D.	N.D.						N.D.				2	15	O96015	DNAL4_HUMAN	Dynein light chain 4, axonemal		Ace|R(1)	59	904.952	2
	M	A	E	NatA	6	Ace(6)	Ace	AEVEE	AEVEETLKR	R	100	100	0						1.35166	0.434727	0.937266		2	10	Q8TF09	DLRB2_HUMAN	Dynein light chain roadblock-type 2	Q9NP97 (2-10)	Ace|R(4), Ace|R<C13N15>(2)	68	582.317	2
	F	M	L	NatC or other	2	Ace(2)	Ace	MLETL	MLETLR	R	N.D.	N.D.	N.D.						N.D.				1	6	Q96EV8	DTBP1_HUMAN	Dysbindin	Q969G5 (35-40), Q12891 (187-192)	Ace|R(1), Ace|R<C13N15>(1)	38	410.715	2
	-	M	I	NatC or other	4	Ace(2), AcD3C13(2)	Ace	MIEES	MIEESGNKR	R	73	73	0						1.03496	0.049575	-0.0100074		1	9	O60941	DTNB_HUMAN	Dystrobrevin beta		Ace|R(1), Ace|R<C13N15>(1), AcD3C13|R(1), AcD3C13|R<C13N15>(1)	59	584.785	2
	-	M	K	other	7	AcD3C13(5), Ace(2)	AcD3C13	MKGKE	MKGKEEKEGGAR	R	25	29	4						0.919321	-0.12136	-0.430419		1	12	Q9UNE7	CHIP_HUMAN	E3 ubiquitin-protein ligase CHIP		AcD3C13|R(4), Ace|R(1), Ace|R<C13N15>(1), AcD3C13|R<C13N15>(1)	94	762.41	2
	-	M	D	NatB	1	Ace(1)	Ace	MDSLP	MDSLPDEFFVR	R	100	100	0						0.76685	-0.382984	-1.07388		1	11	Q86Y13	DZIP3_HUMAN	E3 ubiquitin-protein ligase DZIP3		Ace|R(1)	30	707.322	2
	M	A	V	NatA	1	Ace(1)	Ace	AVTEA	AVTEASLLR	R<C13N15>	100	100	0						1.36446	0.44833	0.970722		2	10	Q9NW38	FANCL_HUMAN	E3 ubiquitin-protein ligase FANCL		Ace|R<C13N15>(1)	35	506.289	2
	M	A	G	NatA	3	AcD3C13(1), Ace(2)	Ace	AGPGP	AGPGPGAVLESPR	R<C13N15>	59	97	38	√					1.02355	0.0335765	-0.0493555		2	14	Q5T447	HECD3_HUMAN	E3 ubiquitin-protein ligase HECTD3		AcD3C13|R(1), Ace|R<C13N15>(1), Ace|R(1)	48	630.335	2
	M	P	D	none	1	AcD3C13(1)	AcD3C13	PDQAL	PDQALQQMLDR	R	0	0	0						0.712401	-0.489238	-1.33521		2	12	Q9NX47	MARH5_HUMAN	E3 ubiquitin-protein ligase MARCH5		AcD3C13|R(1)	48	689.343	2
	-	M	E	NatB	1	Ace(1)	Ace	MESKP	MESKPSR	R	100	100	0						1.3362	0.418136	0.89646		1	7	Q9H992	MARH7_HUMAN	E3 ubiquitin-protein ligase MARCH7		Ace|R(1)	40	470.231	2
	M	A	T	NatA	2	Ace(2)	Ace	ATGLG	ATGLGEPVYGLSEDEGESR	R<C13N15>	100	100	0						0.88839	-0.170735	-0.551855		2	20	Q96PU5	NED4L_HUMAN	E3 ubiquitin-protein ligase NEDD4-like		Ace|R<C13N15>(1), Ace|R(1)	84	1009.47	2
	-	M	D	NatB	5	Ace(5)	Ace	MDSLA	MDSLAESR	R	100	100	0						0.81435	-0.296279	-0.860628		1	8	Q9NS91	RAD18_HUMAN	E3 ubiquitin-protein ligase RAD18		Ace|R<C13N15>(2), Ace|R(3)	76	483.713	2
	M	A	A	NatA	13	Ace(13)	Ace	AAAMD	AAAMDVDTPSGTNSGAGKKR	R	98	100	2						0.893432	-0.16257	-0.531775		2	21	P62877	RBX1_HUMAN	E3 ubiquitin-protein ligase RBX1		Ace|R(9), Ace|R<C13N15>(4)	105	696.011	3
	-	M	E	NatB	2	Ace(2)	Ace	MENSD	MENSDSNDKGSGDQSAAQR	R	100	100	0						1.80251	0.850003	1.95863		1	19	Q9NVW2	RNF12_HUMAN	E3 ubiquitin-protein ligase RLIM		Ace|R(2)	110	1051.44	2
	M	A	S	NatA	2	Ace(2)	Ace	ASKGA	ASKGAGMSFSR	R	100	100	0						0.9341	-0.0983511	-0.373829		2	12	Q5XPI4	RN123_HUMAN	E3 ubiquitin-protein ligase RNF123		Ace|R(1), Ace|R<C13N15>(1)	75	602.293	2
	M	A	A	NatA	2	AcD3C13(1), Ace(1)	AcD3C13	AAAEE	AAAEEEDGGPEGPNR	R	37	93	56	√	√	√			1.55824	0.639916	1.44192		2	16	Q99942	RNF5_HUMAN	E3 ubiquitin-protein ligase RNF5		AcD3C13|R(1), Ace|R(1)	80	773.342	2
	M	A	S	NatA	2	Ace(2)	Ace	ASELE	ASELEPEVQAIDR	R<C13N15>	100	100	0						0.93127	-0.102729	-0.384595		2	14	Q8IWV8	UBR2_HUMAN	E3 ubiquitin-protein ligase UBR2		Ace|R<C13N15>(1), Ace|R(1)	81	754.877	2
	-	M	D	NatB	3	Ace(3)	Ace	MDGAA	MDGAAGPGDGPAR	R<C13N15>	100	100	0						1.25734	0.330379	0.680623		1	13	Q32P44	EMAL3_HUMAN	Echinoderm microtubule-associated protein-like 3		Ace|R<C13N15>(2), Ace|R(1)	73	620.269	2
	-	M	D	NatB	6	Ace(6)	Ace	MDGFA	MDGFAGSLDDSISAASTSDVQDR	R	100	100	0						1.10749	0.1473	0.230346		1	23	Q9HC35	EMAL4_HUMAN	Echinoderm microtubule-associated protein-like 4		Ace|R(4), Ace|R<C13N15>(2)	123	1202.02	2
	M	A	T	NatA	15	Ace(15)	Ace	ATDEL	ATDELATKLSR	R<C13N15>	100	100	0						0.564102	-0.825972	-2.1634		2	12	Q96C19	EFHD2_HUMAN	EF-hand domain-containing protein D2		Ace|R<C13N15>(9), Ace|R(6)	67	652.358	2
	M	A	N	NatA	2	Ace(2)	Ace	ANDSG	ANDSGGPGGPSPSER	R<C13N15>	72	100	28	√					0.850323	-0.233918	-0.707252		2	16	Q9GZT9	EGLN1_HUMAN	Egl nine homolog 1		Ace|R<C13N15>(1), Ace|R(1)	86	718.817	2
	-	M	N	NatB or other	5	Ace(5)	Ace	MNLQA	MNLQAQPKAQNKR	R	98	98	0						1.7933	0.842614	1.94045		1	13	Q6PJG2	EMSA1_HUMAN	ELM2 and SANT domain-containing protein 1		Ace|R(4), Ace|R<C13N15>(1)	99	839.954	2
	M	A	A	NatA	2	Ace(2)	Ace	AAGTL	AAGTLYTYPENWR	R	93	100	7	√					1.30769	0.387023	0.819939		2	14	P26641	EF1G_HUMAN	Elongation factor 1-gamma		Ace|R<C13N15>(1), Ace|R(1)	40	792.378	2
	-	M	V	other	11	AcD3C13(7), Ace(4)	AcD3C13	MVNFT	MVNFTVDQIR	R<C13N15>	22	33	11	√					0.557143	-0.843881	-2.20744		1	10	P13639	EF2_HUMAN	Elongation factor 2		AcD3C13|R<C13N15>(3), AcD3C13|R(4), Ace|R<C13N15>(2), Ace|R(2)	79	648.336	2
	M	V	N	NatA	76	AcD3C13(76)	AcD3C13	VNFTV	VNFTVDQIR	R<C13N15>	0	0	0						0.740477	-0.433473	-1.19805		2	10	P13639	EF2_HUMAN	Elongation factor 2		AcD3C13|R(35), AcD3C13|R<C13N15>(41)	86	574.818	2
	-	M	D	NatB	2	Ace(2)	Ace	MDNYA	MDNYADLSDTELTTLLR	R	100	100	0						1.60986	0.686935	1.55757		1	17	P50402	EMD_HUMAN	Emerin		Ace|R(1), Ace|R<C13N15>(1)	139	1014.97	2
	M	A	A	NatA	3	Ace(3)	Ace	AAVLQ	AAVLQR	R<C13N15>	100	100	0						0.918593	-0.122502	-0.433227		2	7	Q53H82	LACB2_HUMAN	Endoribonuclease LACTB2	P52789 (391-396), P10644 (300-305)	Ace|R<C13N15>(3)	49	355.215	2
	-	M	E	NatB	1	Ace(1)	Ace	MEVAP	MEVAPEQPR	R	100	100	0						2.35154	1.23361	2.90209	99% siNatA	1	9	P23769	GATA2_HUMAN	Endothelial transcription factor GATA-2		Ace|R(1)	51	557.764	2
	-	M	K	other	2	AcD3C13(2)	AcD3C13	MKYKN	MKYKNLMAR	R	0	0	0						1.60604	0.683508	1.54914		1	9	Q14511	CASL_HUMAN	Enhancer of filamentation 1		AcD3C13|R(1), AcD3C13|R<C13N15>(1)	44	664.362	2
	M	V	V	NatA	6	AcD3C13(6)	AcD3C13	VVSKM	VVSKMNKDAQMR	R<C13N15>	0	0	0						1.26777	0.342297	0.709936		2	13	Q9NPA8	ENY2_HUMAN	Enhancer of yellow 2 transcription factor homolog		AcD3C13|R(3), AcD3C13|R<C13N15>(3)	67	795.419	2
	M	S	T	NatA	1	Ace(1)	Ace	STATG	STATGPEAAPKPSAKSIYEQR	R	100	100	0						1.14275	0.19251	0.341538		2	22	Q8TE68	ES8L1_HUMAN	Epidermal growth factor receptor kinase substrate 8-like protein 1		Ace|R(1)	66	1163.11	2
	M	S	Q	NatA	1	Ace(1)	Ace	SQSGA	SQSGAVSCCPGATNGSLGR	R	N.D.	N.D.	N.D.						Singleton light			99% siNatA	2	20	Q9H6S3	ES8L2_HUMAN	Epidermal growth factor receptor kinase substrate 8-like protein 2		Ace|R(1)	106	954.421	2
	M	A	A	NatA	1	Ace(1)	Ace	AAPLI	AAPLIPLSQQIPTGNSLYESYYKQVDPAYTGR	R	100	100	0						1.09541	0.131471	0.191414		2	33	Q9UBC2	EP15R_HUMAN	Epidermal growth factor receptor substrate 15-like 1		Ace|R(1)	43	1210.62	3
	M	T	A	NatA	1	Ace(1)	Ace	TAQGG	TAQGGLVANR	R	N.D.	100	N.D.		√	√			N.D.				2	11	Q5J8M3	EMC4_HUMAN	ER membrane protein complex subunit 4		Ace|R(1)	48	514.778	2
	M	A	A	NatA	1	Ace(1)	Ace	AAVVA	AAVVAKR	R	91	100	9	√					1.61406	0.690692	1.56681		2	8	Q9BV81	EMC6_HUMAN	ER membrane protein complex subunit 6		Ace|R(1)	49	402.258	2
	M	S	I	NatA	2	Ace(2)	Ace	SIAGV	SIAGVAAQEIR	R<C13N15>	100	100	0						0.88271	-0.179989	-0.574614		2	12	Q9UJM3	ERRFI_HUMAN	ERBB receptor feedback inhibitor 1		Ace|R<C13N15>(1), Ace|R(1)	94	583.824	2
	M	A	T	NatA	2	Ace(2)	Ace	ATASP	ATASPAADGGR	R	100	100	0						1.06255	0.0875307	0.0833438		2	12	O43414	ERI3_HUMAN	ERI1 exoribonuclease 3		Ace|R<C13N15>(1), Ace|R(1)	56	508.244	2
	M	G	D	NatA	2	Ace(2)	Ace	GDAKE	GDAKEAGAEGPPAGAAAR	R	100	100	0						0.95593	-0.0650231	-0.291859		2	19	Q3B7T1	EDRF1_HUMAN	Erythroid differentiation-related factor 1		Ace|R(1), Ace|R<C13N15>(1)	99	842.916	2
	M	S	S	NatA	3	Ace(3)	Ace	SSKQE	SSKQEIMSDQR	R	100	100	0						0.94114	-0.0875187	-0.347187		2	12	Q9H501	ESF1_HUMAN	ESF1 homolog		Ace|R(2), Ace|R<C13N15>(1)	64	707.335	2
	M	A	S	NatA	1	Ace(1)	Ace	ASQLQ	ASQLQNR	R<C13N15>	100	100	0						1.25595	0.328779	0.676689		2	8	Q92506	DHB8_HUMAN	Estradiol 17-beta-dehydrogenase 8		Ace|R<C13N15>(1)	34	434.729	2
	M	A	D	NatA	1	Ace(1)	Ace	ADSVK	ADSVKTFLQDLAR	R	100	100	0						2.47742	1.30884	3.08712	99% siNatA	2	14	O14681	EI24_HUMAN	Etoposide-induced protein 2.4 homolog		Ace|R(1)	68	776.92	2
	M	A	D	NatA	2	Ace(2)	Ace	ADEDL	ADEDLIFR	R	100	100	0						0.66854	-0.580914	-1.56068		2	9	O00418	EF2K_HUMAN	Eukaryotic elongation factor 2 kinase		Ace|R<C13N15>(1), Ace|R(1)	67	510.753	2
	M	S	G	NatA	1	Ace(1)	Ace	SGGSA	SGGSADYNR	R	100	100	0						1.88652	0.915731	2.12029		2	10	Q14240	IF4A2_HUMAN	Eukaryotic initiation factor 4A-II		Ace|R(1)	32	484.707	2
	M	A	T	NatA	27	Ace(27)	Ace	ATTAT	ATTATMATSGSAR	R<C13N15>	100	100	0						1.13888	0.187614	0.329497		2	14	P38919	IF4A3_HUMAN	Eukaryotic initiation factor 4A-III		Ace|R<C13N15>(13), Ace|R(14)	100	647.303	2
	M	P	K	none	16	AcD3C13(16)	AcD3C13	PKNKG	PKNKGKGGKNR	R	0	0	0						0.938706	-0.0912547	-0.356375		2	12	O14602	IF1AY_HUMAN	Eukaryotic translation initiation factor 1A, Y-chromosomal	P47813 (2-12)	AcD3C13|R(14), AcD3C13|R<C13N15>(2)	82	709.946	2
	M	P	G	none	3	AcD3C13(3)	AcD3C13	PGLSC	PGLSCR	R<C13N15>	0	0	0						0.845	-0.242977	-0.729532		2	7	P05198	IF2A_HUMAN	Eukaryotic translation initiation factor 2 subunit 1		AcD3C13|R(1), AcD3C13|R<C13N15>(2)	37	373.696	2
	-	M	A	other	2	Ace(2)	Ace	MAPST	MAPSTPLLTVR	R	100	100	0						0.69146	-0.532282	-1.44107		1	11	Q9BY44	EIF2A_HUMAN	Eukaryotic translation initiation factor 2A		Ace|R<C13N15>(1), Ace|R(1)	63	622.34	2
	M	A	P	none	5	AcD3C13(5)	AcD3C13	APSTP	APSTPLLTVR	R	0	0	0						0.900354	-0.151436	-0.504389		2	11	Q9BY44	EIF2A_HUMAN	Eukaryotic translation initiation factor 2A		AcD3C13|R<C13N15>(3), AcD3C13|R(2)	44	551.335	2
	-	M	F	NatC or other	5	Ace(5)	Ace	MFAKA	MFAKAFR	R<C13N15>	100	100	0						0.77714	-0.363754	-1.02658		1	7	P41214	EIF2D_HUMAN	Eukaryotic translation initiation factor 2D		Ace|R<C13N15>(3), Ace|R(2)	55	493.261	2
	-	M	Q	NatB or other	18	Ace(18)	Ace	MQDAE	MQDAENVAVPEAAEER	R	100	100	0						0.811806	-0.300793	-0.87173		1	16	P55884	EIF3B_HUMAN	Eukaryotic translation initiation factor 3 subunit B		Ace|R<C13N15>(9), Ace|R(9)	103	908.905	2
	M	A	E	NatA	10	Ace(10)	Ace	AEYDL	AEYDLTTR	R	100	100	0						0.847498	-0.238718	-0.719058		2	9	P60228	EIF3E_HUMAN	Eukaryotic translation initiation factor 3 subunit E		Ace|R<C13N15>(5), Ace|R(5)	65	505.744	2
	M	A	M	NatA	25	Ace(25)	Ace	AMFEQ	AMFEQMR	R	100	100	0						0.788859	-0.34216	-0.973472		2	8	Q9UBQ5	EIF3K_HUMAN	Eukaryotic translation initiation factor 3 subunit K		Ace|R<C13N15>(14), Ace|R(11)	55	493.707	2
	M	S	Y	NatA	1	Ace(1)	Ace	SYPAD	SYPADDYESEAAYDPYAYPSDYDMHTGDPKQDLAYER	R	100	100	0						0.81262	-0.299347	-0.868174		2	38	Q9Y262	EIF3L_HUMAN	Eukaryotic translation initiation factor 3 subunit L		Ace|R(1)	56	1104.21	4
	M	S	V	NatA	13	Ace(13)	Ace	SVPAF	SVPAFIDISEEDQAAELR	R	92	100	8	√					0.768013	-0.380796	-1.0685		2	19	Q7L2H7	EIF3M_HUMAN	Eukaryotic translation initiation factor 3 subunit M		Ace|R(6), Ace|R<C13N15>(7)	122	1016.5	2
	-	M	E	NatB	12	Ace(12)	Ace	MESAI	MESAIAEGGASR	R	100	100	0						0.847265	-0.239116	-0.720036		1	12	P78344	IF4G2_HUMAN	Eukaryotic translation initiation factor 4 gamma 2		Ace|R<C13N15>(6), Ace|R(6)	119	618.78	2
	M	A	D	NatA	11	Ace(11)	Ace	ADFDT	ADFDTYDDR	R	100	100	0						0.724289	-0.465362	-1.27649		2	10	Q15056	IF4H_HUMAN	Eukaryotic translation initiation factor 4H		Ace|R<C13N15>(5), Ace|R(6)	68	580.231	2
	M	S	V	NatA	2	Ace(2)	Ace	SVNVN	SVNVNR	R	100	100	0						0.84719	-0.239243	-0.720348		2	7	P55010	IF5_HUMAN	Eukaryotic translation initiation factor 5		Ace|R<C13N15>(1), Ace|R(1)	47	365.696	2
	M	A	D	NatA	35	Ace(35)	Ace	ADDLD	ADDLDFETGDAGASATFPMQCSALR	R<C13N15>	100	100	0						0.848425	-0.23714	-0.715178		2	26	P63241	IF5A1_HUMAN	Eukaryotic translation initiation factor 5A-1	Q6IS14 (2-26)	Ace|R(19), Ace|R<C13N15>(16)	132	905.391	3
	M	A	D	NatA	4	Ace(4)	Ace	ADEID	ADEIDFTTGDAGASSTYPMQCSALR	R	100	100	0						0.75442	-0.40656	-1.13186		2	26	Q9GZV4	IF5A2_HUMAN	Eukaryotic translation initiation factor 5A-2		Ace|R(2), Ace|R<C13N15>(2)	104	1361.58	2
	M	A	A	NatA	6	Ace(6)	Ace	AAEAA	AAEAAGGKYR	R<C13N15>	100	100	0						1.19696	0.259373	0.505986		2	11	Q96A65	EXOC4_HUMAN	Exocyst complex component 4		Ace|R<C13N15>(2), Ace|R(4)	69	546.787	2
	M	A	T	NatA	2	Ace(2)	Ace	ATTAE	ATTAELFEEPFVADEYIER	R	100	100	0						1.06856	0.0956679	0.103357		2	20	O00471	EXOC5_HUMAN	Exocyst complex component 5		Ace|R(1), Ace|R<C13N15>(1)	60	758.028	3
	M	A	E	NatA	5	Ace(5)	Ace	AEPAS	AEPASVAAESLAGSR	R	100	100	0						1.15216	0.204341	0.370636		2	16	Q9NQT5	EXOS3_HUMAN	Exosome complex component RRP40		Ace|R(3), Ace|R<C13N15>(2)	124	729.366	2
	M	A	G	NatA	4	Ace(4)	Ace	AGLEL	AGLELLSDQGYR	R	95.3562	100	4.64377	√					1.16355	0.218528	0.405528		2	13	Q9NPD3	EXOS4_HUMAN	Exosome complex component RRP41		Ace|R(2), Ace|R<C13N15>(2)	91	682.347	2
	M	A	A	NatA	5	Ace(5)	Ace	AAGFK	AAGFKTVEPLEYYR	R<C13N15>	100	100	0						1.17239	0.229456	0.432405		2	15	Q96B26	EXOS8_HUMAN	Exosome complex component RRP43		Ace|R<C13N15>(3), Ace|R(2)	79	871.953	2
	-	M	K	other	2	AcD3C13(2)	AcD3C13	MKETP	MKETPLSNCER	R	2	1	-1						1.15452	0.207293	0.377897		1	11	Q06265	EXOS9_HUMAN	Exosome complex component RRP45		AcD3C13|R(1), AcD3C13|R<C13N15>(1)	74	737.853	2
	-	M	L	NatC or other	1	Ace(1)	Ace	MLKSK	MLKSKTFLKKTR	R<C13N15>	100	100	0						0.56727	-0.817893	-2.14353		1	12	Q9Y2L1	RRP44_HUMAN	Exosome complex exonuclease RRP44		Ace|R<C13N15>(1)	53	869.035	2
	-	M	Q	NatB or other	1	AcD3C13(1)	AcD3C13	MQAKK	MQAKKR	R	100	100	0						1.20261	0.266169	0.522701		1	6	Q16394	EXT1_HUMAN	Exostosin-1		AcD3C13|R(1)	39	459.778	2
	M	A	S	NatA	4	Ace(4)	Ace	ASEEA	ASEEASLR	R	100	100	0						0.940415	-0.0886305	-0.349921		2	9	Q96QU8	XPO6_HUMAN	Exportin-6		Ace|R(2), Ace|R<C13N15>(2)	63	452.722	2
	-	M	D	NatB	4	Ace(4)	Ace	MDEQA	MDEQALLGLNPNADSDFR	R	100	100	0						0.948425	-0.0763944	-0.319827		1	18	O43592	XPOT_HUMAN	Exportin-T		Ace|R(2), Ace|R<C13N15>(2)	105	1032.47	2
	-	M	P	none	1	AcD3C13(1)	AcD3C13	MPKPI	MPKPINVR	R	0	0	0						0.52867	-0.919561	-2.39358		1	8	P15311	EZRI_HUMAN	Ezrin	P35241 (1-8)	AcD3C13|R(1)	31	532.815	2
	M	P	K	none	11	AcD3C13(11)	AcD3C13	PKPIN	PKPINVR	R<C13N15>	0	0	0						0.977672	-0.0325779	-0.212061		2	8	P15311	EZRI_HUMAN	Ezrin	P35241 (2-8)	AcD3C13|R<C13N15>(6), AcD3C13|R(5)	51	464.301	2
	M	A	V	NatA	5	Ace(5)	Ace	AVTLD	AVTLDKDAYYR	R<C13N15>	100	100	0						0.688714	-0.538023	-1.45519		2	12	Q9Y5B9	SP16H_HUMAN	FACT complex subunit SPT16		Ace|R<C13N15>(2), Ace|R(3)	74	707.366	2
	M	A	E	NatA	6	Ace(6)	Ace	AETLE	AETLEFNDVYQEVKGSMNDGR	R<C13N15>	100	100	0						0.762613	-0.390976	-1.09353		2	22	Q08945	SSRP1_HUMAN	FACT complex subunit SSRP1		Ace|R(2), Ace|R<C13N15>(4)	88	1259.08	2
	M	A	D	NatA	11	Ace(11)	Ace	ADLEE	ADLEEQLSDEEKVR	R	100	100	0						1.41197	0.497713	1.09218		2	15	P47755	CAZA2_HUMAN	F-actin-capping protein subunit alpha-2		Ace|R(7), Ace|R<C13N15>(4)	108	875.429	2
	M	S	D	NatA	13	Ace(13)	Ace	SDQQL	SDQQLDCALDLMR	R	100	100	0						1.23321	0.302423	0.611866		2	14	P47756	CAPZB_HUMAN	F-actin-capping protein subunit beta		Ace|R(8), Ace|R<C13N15>(5)	93	811.861	2
	M	A	A	NatA	3	Ace(3)	Ace	AAAAA	AAAAAGLGGGGAGPGPEAGDFLAR	R	100	100	0						1.13187	0.178708	0.307593		2	25	P23610	F8I2_HUMAN	Factor VIII intron 22 protein		Ace|R(2), Ace|R<C13N15>(1)	135	1027.01	2
	M	T	S	NatA	2	Ace(2)	Ace	TSKQA	TSKQAMSSNEQER	R<C13N15>	100	100	0						1.02682	0.0381833	-0.0380251		2	14	Q8NB91	FANCB_HUMAN	Fanconi anemia group B protein		Ace|R<C13N15>(1), Ace|R(1)	50	805.869	2
	M	A	D	NatA	1	Ace(1)	Ace	ADYST	ADYSTVPPPSSGSAGGGGGGGGGGGVNDAFKDALQR	R	86	100	14	√					0.622388	-0.684114	-1.8145		2	37	Q96AE4	FUBP1_HUMAN	Far upstream element-binding protein 1		Ace|R(1)	30	1655.27	2
	M	S	D	NatA	12	Ace(12)	Ace	SDYST	SDYSTGGPPPGPPPPAGGGGGAGGAGGGPPPGPPGAGDR	R	100	100	0						1.0239	0.0340795	-0.0481183		2	40	Q92945	FUBP2_HUMAN	Far upstream element-binding protein 2		Ace|R(9), Ace|R<C13N15>(3)	195	1082.83	3
	M	A	T	NatA	1	Ace(1)	Ace	ATVQQ	ATVQQLEGR	R	100	N.D.	N.D.						Singleton light			99% siNatA	2	10	Q01469	FABP5_HUMAN	Fatty acid-binding protein, epidermal		Ace|R(1)	66	522.278	2
	-	M	E	NatB	2	Ace(2)	Ace	MELEV	MELEVR	R<C13N15>	100	100	0						1.75488	0.811372	1.86362		1	6	P51648	AL3A2_HUMAN	Fatty aldehyde dehydrogenase		Ace|R(1), Ace|R<C13N15>(1)	47	422.709	2
	-	M	E	NatB	2	Ace(2)	Ace	MEPVG	MEPVGCCGECR	R	100	100	0						0.85105	-0.232684	-0.704218		1	11	Q8NEZ5	FBX22_HUMAN	F-box only protein 22		Ace|R(1), Ace|R<C13N15>(1)	34	706.757	2
	-	M	E	NatB	4	Ace(4)	Ace	MEPPM	MEPPMEPSGGEQEPGAVR	R	100	100	0						1.11935	0.162661	0.268126		1	18	Q9H469	FXL15_HUMAN	F-box/LRR-repeat protein 15		Ace|R<C13N15>(2), Ace|R(2)	66	986.425	2
	-	M	D	NatB	1	Ace(1)	Ace	MDDYS	MDDYSLDEFR	R	100	100	0						1.46714	0.553007	1.22817		1	10	Q8N3Y1	FBXW8_HUMAN	F-box/WD repeat-containing protein 8		Ace|R(1)	51	674.772	2
	-	M	E	NatB	2	Ace(2)	Ace	MELPL	MELPLGR	R<C13N15>	100	100	0						1.29338	0.371146	0.78089		1	7	Q5XUX1	FBXW9_HUMAN	F-box/WD repeat-containing protein 9		Ace|R<C13N15>(2)	53	442.233	2
	M	S	I	NatA	2	Ace(2)	Ace	SISSD	SISSDEVNFLVYR	R<C13N15>	100	100	0						1.2938	0.371615	0.782042		2	14	Q9BZK7	TBL1R_HUMAN	F-box-like/WD repeat-containing protein TBL1XR1		Ace|R<C13N15>(1), Ace|R(1)	53	790.895	2
	-	M	D	NatB	3	Ace(3)	Ace	MDGTE	MDGTEGSAGQPGPAER	R<C13N15>	100	100	0						1.0378	0.0535284	-0.000284067		1	16	Q9BZ67	FRMD8_HUMAN	FERM domain-containing protein 8		Ace|R(2), Ace|R<C13N15>(1)	67	814.348	2
	M	G	E	NatA	1	Ace(1)	Ace	GEIEG	GEIEGTYR	R	100	100	0						1.43361	0.519653	1.14614		2	9	O94887	FARP2_HUMAN	FERM, RhoGEF and pleckstrin domain-containing protein 2		Ace|R(1)	30	483.73	2
	-	M	T	other	2	Ace(2)	Ace	MTTAS	MTTASTSQVR	R	N.D.	N.D.	N.D.						N.D.				1	10	P02794	FRIH_HUMAN	Ferritin heavy chain		Ace|R(1), Ace|R<C13N15>(1)	33	570.272	2
	M	T	T	NatA	7	Ace(6), AcD3C13(1)	AcD3C13	TTAST	TTASTSQVR	R	86	100	14	√					0.993913	-0.00880846	-0.1536		2	10	P02794	FRIH_HUMAN	Ferritin heavy chain		Ace|R<C13N15>(3), Ace|R(3), AcD3C13|R(1)	78	499.267	2
	M	A	A	NatA	5	Ace(5)	Ace	AATAA	AATAAAVVAEEDTELR	R	100	100	0						0.724145	-0.465649	-1.27719		2	17	O95684	FR1OP_HUMAN	FGFR1 oncogene partner		Ace|R<C13N15>(3), Ace|R(2)	117	829.915	2
	M	S	G	NatA	2	Ace(2)	Ace	SGGEQ	SGGEQKPER	R	100	100	0						1.00735	0.010565	-0.105952		2	10	Q96C11	FGGY_HUMAN	FGGY carbohydrate kinase domain-containing protein		Ace|R(1), Ace|R<C13N15>(1)	48	538.769	2
	M	A	S	NatA	1	Ace(1)	Ace	ASKPE	ASKPEKR	R<C13N15>	100	100	0						0.99921	-0.00114018	-0.13474		2	8	Q8WUP2	FBLI1_HUMAN	Filamin-binding LIM protein 1		Ace|R<C13N15>(1)	42	481.286	2
	-	M	F	NatC or other	2	Ace(2)	Ace	MFGAG	MFGAGDEDDTDFLSPSGGAR	R	100	100	0						1.12421	0.168912	0.283498		1	20	Q5T1M5	FKB15_HUMAN	FK506-binding protein 15		Ace|R<C13N15>(1), Ace|R(1)	104	1051.93	2
	-	M	D	NatB	2	Ace(2)	Ace	MDDVP	MDDVPAPTPAPAPPAAAAPR	R	100	100	0						1.55054	0.632771	1.42435		1	20	Q96SL8	FIZ1_HUMAN	Flt3-interacting zinc finger protein 1		Ace|R<C13N15>(1), Ace|R(1)	52	985.986	2
	-	M	G	other	1	AcD3C13(1)	AcD3C13	MGPVI	MGPVIGMTPDKR	R<C13N15>	0	0	0						0.89965	-0.152564	-0.507165		1	12	P32314	FOXN2_HUMAN	Forkhead box protein N2		AcD3C13|R<C13N15>(1)	33	719.375	2
	-	M	M	other	3	Ace(3)	Ace	MMVES	MMVESASETIR	R	100	100	0						2.19429	1.13376	2.65651	99% siNatA	1	11	Q8IVH2	FOXP4_HUMAN	Forkhead box protein P4		Ace|R(2), Ace|R<C13N15>(1)	60	664.298	2
	M	M	V	other	2	Ace(2)	Ace	MVESA	MVESASETIR	R	100	100	0						1.80166	0.849327	1.95697		2	11	Q8IVH2	FOXP4_HUMAN	Forkhead box protein P4		Ace|R(1), Ace|R<C13N15>(1)	74	590.779	2
	-	M	Y	NatC or other	1	Ace(1)	Ace	MYQDY	MYQDYPGNFDTSSR	R	100	100	0						1.848	0.885965	2.04708		1	14	P15408	FOSL2_HUMAN	Fos-related antigen 2		Ace|R(1)	48	869.854	2
	M	S	E	NatA	2	Ace(2)	Ace	SESFD	SESFDCAKCNESLYGR	R	100	100	0						1.06226	0.0871369	0.0823753		2	17	Q13643	FHL3_HUMAN	Four and a half LIM domains protein 3		Ace|R<C13N15>(1), Ace|R(1)	69	1006.43	2
	-	M	E	NatB	4	Ace(4)	Ace	MEELV	MEELVVEVR	R	100	100	0						0.95017	-0.0737424	-0.313304		1	9	Q06787	FMR1_HUMAN	Fragile X mental retardation protein 1		Ace|R(2), Ace|R<C13N15>(2)	68	581.295	2
	M	A	E	NatA	8	Ace(8)	Ace	AELTV	AELTVEVR	R	100	100	0						0.975233	-0.0361807	-0.220922		2	9	P51114	FXR1_HUMAN	Fragile X mental retardation syndrome-related protein 1		Ace|R(4), Ace|R<C13N15>(4)	72	479.764	2
	M	G	G	NatA	1	AcD3C13(1)	AcD3C13	GGLAS	GGLASGGDVEPGLPVEVR	R	0	11	11	√					1.0445	0.0628156	0.0225574		2	19	P51116	FXR2_HUMAN	Fragile X mental retardation syndrome-related protein 2		AcD3C13|R(1)	88	878.465	2
	M	A	S	NatA	2	Ace(2)	Ace	ASTNA	ASTNAESQLQR	R<C13N15>	100	100	0						1.59659	0.674994	1.5282		2	12	Q9BQS8	FYCO1_HUMAN	FYVE and coiled-coil domain-containing protein 1		Ace|R(1), Ace|R<C13N15>(1)	60	628.809	2
	M	A	D	NatA	8	Ace(8)	Ace	ADSKE	ADSKEGVLPLTAASTAPISFGFTR	R	100	100	0						0.890803	-0.166822	-0.542233		2	25	Q92917	GPKOW_HUMAN	G patch domain and KOW motifs-containing protein		Ace|R(4), Ace|R<C13N15>(4)	79	1263.17	2
	-	M	N	NatB or other	1	Ace(1)	Ace	MNVTP	MNVTPEVKSR	R<C13N15>	100	100	0						1.18707	0.247405	0.476551		1	10	Q5T3I0	GPTC4_HUMAN	G patch domain-containing protein 4		Ace|R<C13N15>(1)	72	638.333	2
	-	M	E	NatB	1	Ace(1)	Ace	MELLC	MELLCCEGTR	R	100	100	0						3.67403	1.87736	4.4854	99% siNatA	1	10	P30281	CCND3_HUMAN	G1/S-specific cyclin-D3		Ace|R(1)	54	663.778	2
	M	A	C	NatA	7	Ace(7)	Ace	ACGLV	ACGLVASNLNLKPGECLR	R	88	100	12	√					1.42136	0.507271	1.11569		2	19	P09382	LEG1_HUMAN	Galectin-1		Ace|R(4), Ace|R<C13N15>(3)	93	1031.03	2
	-	M	F	NatC or other	1	Ace(1)	Ace	MFSVF	MFSVFEEITR	R	100	100	0						1.84639	0.884704	2.04397		1	10	Q8TAX9	GSDMB_HUMAN	Gasdermin-B		Ace|R(1)	33	658.813	2
	-	M	Q	NatB or other	4	Ace(4)	Ace	MQTPV	MQTPVNIPVPVLR	R	100	100	0						1.15038	0.20211	0.36515		1	13	Q9H840	GEMI7_HUMAN	Gem-associated protein 7		Ace|R(2), Ace|R<C13N15>(2)	76	761.428	2
	-	M	D	NatB	2	Ace(2)	Ace	MDAAE	MDAAEPGLPPGPEGR	R	100	100	0						1.02541	0.0362009	-0.0429009		1	15	Q9P107	GMIP_HUMAN	GEM-interacting protein		Ace|R(1), Ace|R<C13N15>(1)	51	776.359	2
	M	A	A	NatA	3	Ace(3)	Ace	AAEAA	AAEAADLGLGAAVPVELR	R	95	100	5	√				(√)	1.11595	0.158277	0.257342		2	19	Q9Y5Q8	TF3C5_HUMAN	General transcription factor 3C polypeptide 5		Ace|R(2), Ace|R<C13N15>(1)	99	882.979	2
	M	A	D	NatA	2	Ace(2)	Ace	ADPDV	ADPDVLTEVPAALKR	R<C13N15>	100	100	0						1.12618	0.171437	0.289711		2	16	P29083	T2EA_HUMAN	General transcription factor IIE subunit 1		Ace|R(1), Ace|R<C13N15>(1)	101	847.472	2
	M	A	A	NatA	6	Ace(6)	Ace	AALGP	AALGPSSQNVTEYVVR	R<C13N15>	100	100	0						0.793148	-0.334338	-0.954233		2	17	P35269	T2FA_HUMAN	General transcription factor IIF subunit 1		Ace|R<C13N15>(3), Ace|R(3)	111	871.952	2
	M	A	Q	NatA	9	Ace(9)	Ace	AQVAM	AQVAMSTLPVEDEESSESR	R	100	100	0						0.876768	-0.189734	-0.598582		2	20	P78347	GTF2I_HUMAN	General transcription factor II-I		Ace|R(5), Ace|R<C13N15>(4)	117	1061.98	2
	-	M	E	NatB	2	Ace(2)	Ace	MEKTQ	MEKTQETVQR	R<C13N15>	100	100	0						1.03609	0.0511493	-0.00613544		1	10	O95749	GGPPS_HUMAN	Geranylgeranyl pyrophosphate synthase		Ace|R(1), Ace|R<C13N15>(1)	61	682.839	2
	M	S	E	NatA	4	Ace(4)	Ace	SESLV	SESLVVCDVAEDLVEKLR	R	100	100	0						0.925575	-0.111578	-0.40636		2	19	P60983	GMFB_HUMAN	Glia maturation factor beta		Ace|R(2), Ace|R<C13N15>(2)	86	1075.55	2
	M	A	A	NatA	3	Ace(2), AcD3C13(1)	AcD3C13	AAGGS	AAGGSGVGGKR	R	28	79	51	√				√	0.469837	-1.08977	-2.8122	99% siCTR	2	12	Q9NZM5	GSCR2_HUMAN	Glioma tumor suppressor candidate region gene 2 protein		Ace|R<C13N15>(1), AcD3C13|R(1), Ace|R(1)	97	505.788	2
	M	A	V	NatA	3	Ace(2), AcD3C13(1)	Ace	AVEEL	AVEELQSIIKR	R	80	100	20	√					1.05497	0.0772072	0.0579533		2	12	Q92990	GLMN_HUMAN	Glomulin		Ace|R<C13N15>(1), Ace|R(1), AcD3C13|R(1)	70	687.901	2
	M	A	E	NatA	18	Ace(18)	Ace	AEQVA	AEQVALSR	R	100	100	0						0.969865	-0.0441437	-0.240507		2	9	P11413	G6PD_HUMAN	Glucose-6-phosphate 1-dehydrogenase		Ace|R<C13N15>(9), Ace|R(9)	77	458.248	2
	-	M	A	other	1	Ace(1)	Ace	MAALT	MAALTR	R	100	100	0						1.27397	0.349331	0.727237		1	6	P06744	G6PI_HUMAN	Glucose-6-phosphate isomerase		Ace|R(1)	42	360.689	2
	-	M	N	NatB or other	2	Ace(2)	Ace	MNFLS	MNFLSTAESR	R	100	100	0						1.13945	0.188338	0.331276		1	10	Q2KHR3	QSER1_HUMAN	Glutamine and serine-rich protein 1		Ace|R(1), Ace|R<C13N15>(1)	68	607.279	2
	M	P	P	none	35	AcD3C13(35)	AcD3C13	PPYTV	PPYTVVYFPVR	R<C13N15>	0	0	0						1.23482	0.304306	0.616497		2	12	P09211	GSTP1_HUMAN	Glutathione S-transferase P		AcD3C13|R(22), AcD3C13|R<C13N15>(13)	96	697.889	2
	M	G	K	NatA	59	AcD3C13(59)	AcD3C13	GKVKV	GKVKVGVNGFGR	R<C13N15>	0	0	0						1.04818	0.067886	0.0350281		2	13	P04406	G3P_HUMAN	Glyceraldehyde-3-phosphate dehydrogenase		AcD3C13|R(33), AcD3C13|R<C13N15>(26)	98	684.918	2
	-	M	T	other	2	Ace(2)	Ace	MTPSQ	MTPSQVAFEIR	R	75	84	9						1.26155	0.335195	0.692469		1	11	Q9NPB8	GPCP1_HUMAN	Glycerophosphocholine phosphodiesterase GPCPD1		Ace|R<C13N15>(1), Ace|R(1)	62	668.832	2
	M	A	K	NatA	5	Ace(5)	Ace	AKPLT	AKPLTDSEKR	R	100	100	0						1.07003	0.0976485	0.108228		2	11	P11216	PYGB_HUMAN	Glycogen phosphorylase, brain form		Ace|R(3), Ace|R<C13N15>(2)	64	640.86	2
	M	A	K	NatA	1	Ace(1)	Ace	AKPLT	AKPLTDQEKR	R<C13N15>	97	100	3						0.79104	-0.338177	-0.963676		2	11	P06737	PYGL_HUMAN	Glycogen phosphorylase, liver form		Ace|R<C13N15>(1)	50	666.378	2
	M	S	G	NatA	1	Ace(1)	Ace	SGGGP	SGGGPSGGGPGGSGR	R<C13N15>	N.D.	100	N.D.						N.D.				2	16	P49840	GSK3A_HUMAN	Glycogen synthase kinase-3 alpha		Ace|R<C13N15>(1)	30	598.27	2
	M	T	S	NatA	2	Ace(2)	Ace	TSLTQ	TSLTQR	R	100	100	0						0.95383	-0.0681959	-0.299663		2	7	Q9H4A6	GOLP3_HUMAN	Golgi phosphoprotein 3		Ace|R<C13N15>(1), Ace|R(1)	44	374.203	2
	M	A	A	NatA	3	Ace(3)	Ace	AAVLN	AAVLNAER	R<C13N15>	100	100	0						1.00206	0.00296889	-0.124634		2	9	Q9H3P7	GCP60_HUMAN	Golgi resident protein GCP60		Ace|R<C13N15>(1), Ace|R(2)	78	448.247	2
	M	A	A	NatA	9	Ace(8), AcD3C13(1)	Ace	AAAAA	AAAAAMAEQESAR	R	89	100	11	√					0.769295	-0.378392	-1.06258		2	14	Q7L5D6	GET4_HUMAN	Golgi to ER traffic protein 4 homolog		Ace|R<C13N15>(4), Ace|R(4), AcD3C13|R(1)	103	667.804	2
	M	S	A	NatA	2	Ace(2)	Ace	SAGGP	SAGGPCPAAAGGGPGGASCSVGAPGGVSMFR	R	100	100	0						1.28706	0.364079	0.763509		2	32	Q9HD26	GOPC_HUMAN	Golgi-associated PDZ and coiled-coil motif-containing protein		Ace|R(1), Ace|R<C13N15>(1)	83	921.408	3
	-	M	D	NatB	4	Ace(4)	Ace	MDGAS	MDGASAEQDGLQEDR	R	100	100	0						0.901985	-0.148825	-0.497967		1	15	Q08378	GOGA3_HUMAN	Golgin subfamily A member 3		Ace|R(2), Ace|R<C13N15>(2)	105	840.345	2
	M	A	A	NatA	8	Ace(8)	Ace	AASAA	AASAAAAELQASGGPR	R	100	100	0						0.968325	-0.0464368	-0.246146		2	17	Q9HCN4	GPN1_HUMAN	GPN-loop GTPase 1		Ace|R<C13N15>(3), Ace|R(5)	117	735.371	2
	-	M	D	NatB	4	Ace(4)	Ace	MDVTS	MDVTSQAR	R	100	100	0						1.3738	0.458167	0.994915		1	8	Q99527	GPER_HUMAN	G-protein coupled estrogen receptor 1		Ace|R<C13N15>(2), Ace|R(2)	46	483.221	2
	-	M	E	NatB	1	Ace(1)	Ace	MEENL	MEENLISMR	R	N.D.	N.D.	N.D.						N.D.				1	9	P81274	GPSM2_HUMAN	G-protein-signaling modulator 2		Ace|R(1)	37	598.768	2
	M	A	Q	NatA	2	Ace(2)	Ace	AQALS	AQALSEEEFQR	R	100	100	0						0.95625	-0.0645403	-0.290672		2	12	Q4V328	GRAP1_HUMAN	GRIP1-associated protein 1		Ace|R(2)	92	675.321	2
	-	M	T	other	2	Ace(1), AcD3C13(1)	Ace	MTLEE	MTLEEFSAGEQKTER	R<C13N15>	75	72	-3						0.456492	-1.13134	-2.91444	99% siCTR	1	15	P24522	GA45A_HUMAN	Growth arrest and DNA damage-inducible protein GADD45 alpha		Ace|R<C13N15>(1), AcD3C13|R<C13N15>(1)	70	935.94	2
	M	T	L	NatA	1	Ace(1)	Ace	TLEEF	TLEEFSAGEQKTER	R<C13N15>	43.3839	75.4579	32.0739	√					3.37729	1.75587	4.18658	99% siNatA	2	15	P24522	GA45A_HUMAN	Growth arrest and DNA damage-inducible protein GADD45 alpha		Ace|R<C13N15>(1)	48	862.422	2
	M	P	Q	none	2	AcD3C13(2)	AcD3C13	PQSKS	PQSKSR	R	0	0	0						1.24408	0.315079	0.642995		2	7	Q15382	RHEB_HUMAN	GTP-binding protein Rheb		AcD3C13|R(1), AcD3C13|R<C13N15>(1)	45	398.734	2
	-	M	E	NatB	6	Ace(6)	Ace	MEPAE	MEPAEQPSELVSAEGR	R	100	100	0						1.03191	0.0453218	-0.0204681		1	16	P47224	MSS4_HUMAN	Guanine nucleotide exchange factor MSS4		Ace|R(3), Ace|R<C13N15>(3)	103	894.41	2
	M	S	S	NatA	1	Ace(1)	Ace	SSGAS	SSGASASALQR	R	≥95	100	N.D.						0.95644	-0.0642536	-0.289967		2	12	P50151	GBG10_HUMAN	Guanine nucleotide-binding protein G(I)/G(S)/G(O) subunit gamma-10		Ace|R(1)	77	538.77	2
	M	S	S	NatA	5	Ace(4), AcD3C13(1)	Ace	SSKTA	SSKTASTNNIAQAR	R	78	100	22	√					1.48961	0.574939	1.28211		2	15	Q9UBI6	GBG12_HUMAN	Guanine nucleotide-binding protein G(I)/G(S)/G(O) subunit gamma-12		Ace|R<C13N15>(1), AcD3C13|R(1), Ace|R(3)	99	769.401	2
	M	S	G	NatA	1	Ace(1)	Ace	SGSSS	SGSSSVAAMKKVVQQLR	R	86	100	14	√					1.35385	0.437064	0.943013		2	18	P63218	GBG5_HUMAN	Guanine nucleotide-binding protein G(I)/G(S)/G(O) subunit gamma-5		Ace|R(1)	58	964.533	2
	M	S	E	NatA	2	Ace(2)	Ace	SELDQ	SELDQLR	R	94	100	6	√					1.15748	0.210985	0.386976		2	8	P62873	GBB1_HUMAN	Guanine nucleotide-binding protein G(I)/G(S)/G(T) subunit beta-1		Ace|R(1), Ace|R<C13N15>(1)	47	451.733	2
	M	G	C	NatA	1	AcD3C13(1)	AcD3C13	GCLGN	GCLGNSKTEDQR	R	N.D.	N.D.	N.D.						N.D.				2	13	P63092	GNAS2_HUMAN	Guanine nucleotide-binding protein G(s) subunit alpha isoforms short		AcD3C13|R(1)	50	729.851	2
	-	M	T	other	3	Ace(3)	Ace	MTEQM	MTEQMTLR	R	100	100	0						0.594277	-0.750793	-1.9785		1	8	P63244	GBLP_HUMAN	Guanine nucleotide-binding protein subunit beta-2-like 1		Ace|R<C13N15>(1), Ace|R(2)	41	542.244	2
	M	T	E	NatA	12	Ace(12)	Ace	TEQMT	TEQMTLR	R<C13N15>	100	100	0						0.891297	-0.166021	-0.540261		2	8	P63244	GBLP_HUMAN	Guanine nucleotide-binding protein subunit beta-2-like 1		Ace|R(7), Ace|R<C13N15>(5)	54	473.731	2
	M	T	A	NatA	1	Ace(1)	Ace	TAPCP	TAPCPPPPPDPQFVLR	R<C13N15>	95	100	5	√					0.604889	-0.725258	-1.91569		2	17	Q9BYB4	GNB1L_HUMAN	Guanine nucleotide-binding protein subunit beta-like protein 1		Ace|R<C13N15>(1)	52	920.968	2
	M	G	S	NatA	1	Ace(1)	Ace	GSEAA	GSEAAQLLEAADFAAR	R<C13N15>	49.4172	100	50.5828	√					0.43159	-1.21227	-3.11348	99% siCTR	2	17	Q8N4P3	MESH1_HUMAN	Guanosine-3',5'-bis(diphosphate) 3'-pyrophosphohydrolase MESH1		Ace|R<C13N15>(1)	82	836.416	2
	M	T	K	NatA	2	AcD3C13(2)	AcD3C13	TKIKA	TKIKADPDGPEAQAEACSGER	R	0	0	0				√		1.2465	0.317883	0.64989		2	22	Q9NX24	NHP2_HUMAN	H/ACA ribonucleoprotein complex subunit 2		AcD3C13|R(2)	89	1186.08	2
	-	M	F	NatC or other	3	AcD3C13(3)	AcD3C13	MFLQY	MFLQYYLNEQGDR	R<C13N15>	0	0	0						1.137	0.185232	0.323639		1	13	Q9NPE3	NOP10_HUMAN	H/ACA ribonucleoprotein complex subunit 3		AcD3C13|R(2), AcD3C13|R<C13N15>(1)	109	875.41	2
	-	M	E	NatB	2	Ace(2)	Ace	MELAQ	MELAQEAR	R<C13N15>	100	100	0						0.8279	-0.272472	-0.802074		1	8	O94927	HAUS5_HUMAN	HAUS augmin-like complex subunit 5		Ace|R<C13N15>(1), Ace|R(1)	60	508.241	2
	-	M	Q	NatB or other	4	Ace(4)	Ace	MQSPA	MQSPAVLVTSR	R<C13N15>	100	100	0						1.58283	0.662506	1.49748		1	11	Q53T59	H1BP3_HUMAN	HCLS1-binding protein 3		Ace|R<C13N15>(2), Ace|R(2)	71	628.831	2
	-	M	T	other	2	Ace(2)	Ace	MTSLA	MTSLAQQLQR	R	100	100	0						0.497758	-1.00648	-2.60736	99% siCTR	1	10	Q9H583	HEAT1_HUMAN	HEAT repeat-containing protein 1		Ace|R<C13N15>(1), Ace|R(1)	85	617.317	2
	M	T	S	NatA	1	Ace(1)	Ace	TSLAQ	TSLAQQLQR	R	100	100	0						0.78503	-0.34918	-0.990738		2	10	Q9H583	HEAT1_HUMAN	HEAT repeat-containing protein 1		Ace|R(1)	46	543.799	2
	M	A	D	NatA	2	Ace(2)	Ace	ADKEA	ADKEAGGSDGPR	R	100	100	0						0.84455	-0.243745	-0.731422		2	13	O43301	HS12A_HUMAN	Heat shock 70 kDa protein 12A		Ace|R<C13N15>(1), Ace|R(1)	66	624.794	2
	M	T	T	NatA	3	Ace(3)	Ace	TTTTT	TTTTTFKGVDPNSR	R<C13N15>	100	100	0						1.14161	0.19107	0.337996		2	15	Q9UK76	HN1_HUMAN	Hematological and neurological expressed 1 protein		Ace|R(2), Ace|R<C13N15>(1)	71	812.414	2
	-	M	F	NatC or other	7	Ace(7)	Ace	MFQVP	MFQVPDSEGGR	R<C13N15>	100	100	0						0.87936	-0.185474	-0.588106		1	11	Q9H910	HN1L_HUMAN	Hematological and neurological expressed 1-like protein		Ace|R<C13N15>(4), Ace|R(3)	66	645.787	2
	M	S	A	NatA	1	Ace(1)	Ace	SAEVE	SAEVETSEGVDESEKKNSGALEKENQMR	R<C13N15>	100	100	0						0.65534	-0.609685	-1.63144		2	29	P30519	HMOX2_HUMAN	Heme oxygenase 2		Ace|R<C13N15>(1)	43	1097.52	3
	-	M	S	other	2	Ace(2)	Ace	MSKSE	MSKSESPKEPEQLR	R	100	100	0						1.00922	0.0132407	-0.0993709		1	14	P09651	ROA1_HUMAN	Heterogeneous nuclear ribonucleoprotein A1		Ace|R(2)	69	899.453	2
	M	S	K	NatA	13	Ace(13)	Ace	SKSES	SKSESPKEPEQLR	R	100	100	0						1.02593	0.0369291	-0.0411099		2	14	P09651	ROA1_HUMAN	Heterogeneous nuclear ribonucleoprotein A1		Ace|R(8), Ace|R<C13N15>(5)	79	825.936	2
	M	M	L	NatC or other	8	Ace(8)	Ace	MLGPE	MLGPEGGEGFVVKLR	R	100	100	0				√		1.04049	0.0572585	0.00888988		2	16	P52597	HNRPF_HUMAN	Heterogeneous nuclear ribonucleoprotein F		Ace|R(4), Ace|R<C13N15>(4)	97	847.451	2
	-	M	M	other	1	Ace(1)	Ace	MMLGT	MMLGTEGGEGFVVKVR	R	100	100	0						1.30366	0.382568	0.808981		1	16	P31943	HNRH1_HUMAN	Heterogeneous nuclear ribonucleoprotein H		Ace|R(1)	114	915.958	2
	M	M	L	NatC or other	8	Ace(8)	Ace	MLGTE	MLGTEGGEGFVVKVR	R	100	100	0						0.973771	-0.0383449	-0.226245		2	16	P31943	HNRH1_HUMAN	Heterogeneous nuclear ribonucleoprotein H		Ace|R(6), Ace|R<C13N15>(2)	114	842.439	2
	-	M	M	other	12	Ace(12)	Ace	MMLST	MMLSTEGR	R<C13N15>	100	100	0						1.09065	0.125182	0.175947		1	8	P55795	HNRH2_HUMAN	Heterogeneous nuclear ribonucleoprotein H2		Ace|R(7), Ace|R<C13N15>(5)	56	504.722	2
	M	M	L	NatC or other	2	Ace(2)	Ace	MLSTE	MLSTEGR	R	100	100	0						1.00792	0.0113811	-0.103944		2	8	P55795	HNRH2_HUMAN	Heterogeneous nuclear ribonucleoprotein H2		Ace|R(1), Ace|R<C13N15>(1)	43	426.2	2
	-	M	E	NatB	2	Ace(2)	Ace	METEQ	METEQPEETFPNTETNGEFGKR	R	100	100	0						0.91513	-0.127951	-0.44663		1	22	P61978	HNRPK_HUMAN	Heterogeneous nuclear ribonucleoprotein K		Ace|R(1), Ace|R<C13N15>(1)	69	892.729	3
	M	S	S	NatA	2	Ace(2)	Ace	SSSPV	SSSPVNVKKLKVSELKEELKKR	R	93	100	7	√				√	1.04302	0.0607641	0.0175118		2	23	Q00839	HNRPU_HUMAN	Heterogeneous nuclear ribonucleoprotein U		Ace|R(2)	36	950.913	3
	-	M	E	NatB	6	Ace(6)	Ace	MEKTL	MEKTLETVPLER	R	100	100	0						1.17616	0.234084	0.443789		1	12	P22626	ROA2_HUMAN	Heterogeneous nuclear ribonucleoproteins A2/B1		Ace|R<C13N15>(3), Ace|R(3)	81	775.908	2
	M	A	S	NatA	3	Ace(3)	Ace	ASNVT	ASNVTNKTDPR	R	100	100	0						0.98456	-0.022449	-0.187149		2	12	P07910	HNRPC_HUMAN	Heterogeneous nuclear ribonucleoproteins C1/C2		Ace|R(1), Ace|R<C13N15>(2)	84	646.333	2
	M	S	T	NatA	1	Ace(1)	Ace	STDTG	STDTGVSLPSYEEDQGSKLIR	R	100	100	0					√	1.41827	0.504132	1.10797		2	22	Q9Y241	HIG1A_HUMAN	HIG1 domain family member 1A, mitochondrial		Ace|R(1)	60	1186.09	2
	-	M	G	other	1	Ace(1)	Ace	MGKGD	MGKGDPNKPR	R<C13N15>	91.322	88.3041	-3.01795						1.26	0.333424	0.688112		1	10	P26583	HMGB2_HUMAN	High mobility group protein B2		Ace|R<C13N15>(1)	44	631.331	2
	M	G	K	NatA	12	AcD3C13(12)	AcD3C13	GKGDP	GKGDPNKPR	R<C13N15>	0	0	0						1.24677	0.318191	0.650647		2	10	P26583	HMGB2_HUMAN	High mobility group protein B2		AcD3C13|R(7), AcD3C13|R<C13N15>(5)	63	560.326	2
	M	A	K	NatA	1	AcD3C13(1)	AcD3C13	AKGDP	AKGDPKKPKGKMSAYAFFVQTCR	R	N.D.	N.D.	N.D.						N.D.				2	24	O15347	HMGB3_HUMAN	High mobility group protein B3	P0C6E5 (2-24)	AcD3C13|R(1)	41	971.861	3
	M	S	E	NatA	2	Ace(2)	Ace	SESSS	SESSSKSSQPLASKQEKDGTEKR	R	94	100	6	√				√	1.05951	0.0833932	0.0731676		2	24	P17096	HMGA1_HUMAN	High mobility group protein HMG-I/HMG-Y		Ace|R(2)	78	1362.7	2
	-	M	T	other	2	Ace(2)	Ace	MTQGK	MTQGKKKKR	R<C13N15>	100	100	0						0.82402	-0.279249	-0.818742		1	9	Q96MC6	HIAT1_HUMAN	Hippocampus abundant transcript 1 protein		Ace|R<C13N15>(1), Ace|R(1)	40	680.916	2
	M	A	D	NatA	13	Ace(13)	Ace	ADEIA	ADEIAKAQVAR	R<C13N15>	100	100	0						0.916333	-0.126056	-0.441967		2	12	P49773	HINT1_HUMAN	Histidine triad nucleotide-binding protein 1		Ace|R<C13N15>(7), Ace|R(6)	76	635.852	2
	M	A	E	NatA	2	Ace(2)	Ace	AEEQV	AEEQVNR	R<C13N15>	100	100	0						0.7375	-0.439285	-1.21235		2	8	Q9NQE9	HINT3_HUMAN	Histidine triad nucleotide-binding protein 3		Ace|R<C13N15>(2)	38	449.218	2
	M	A	E	NatA	2	Ace(2)	Ace	AEVGE	AEVGEIIEGCR	R<C13N15>	100	100	0						0.98773	-0.0178114	-0.175743		2	12	Q92993	KAT5_HUMAN	Histone acetyltransferase KAT5		Ace|R(1), Ace|R<C13N15>(1)	69	642.81	2
	-	M	N	NatB or other	4	Ace(3), AcD3C13(1)	Ace	MNGFT	MNGFTPDEMSR	R	89	87	-2						1.33642	0.418376	0.897052		1	11	O75446	SAP30_HUMAN	Histone deacetylase complex subunit SAP30		Ace|R(2), Ace|R<C13N15>(1), AcD3C13|R(1)	54	679.771	2
	-	M	N	NatB or other	2	Ace(2)	Ace	MNGFS	MNGFSTEEDSR	R<C13N15>	100	100	0						1.26675	0.341129	0.707064		1	11	Q9HAJ7	SP30L_HUMAN	Histone deacetylase complex subunit SAP30L		Ace|R(1), Ace|R<C13N15>(1)	40	670.769	2
	-	M	T	other	4	Ace(4)	Ace	MTENS	MTENSTSAPAAKPKR	R<C13N15>	95.8481	95.6258	-0.222329						1.40802	0.493668	1.08223		1	15	P07305	H10_HUMAN	Histone H1.0		Ace|R(2), Ace|R<C13N15>(2)	70	875.952	2
	M	T	E	NatA	2	AcD3C13(1), Ace(1)	AcD3C13	TENST	TENSTSAPAAKPKR	R	15	61	46	√					1.16329	0.218207	0.404739		2	15	P07305	H10_HUMAN	Histone H1.0		AcD3C13|R(1), Ace|R(1)	84	799.943	2
	M	S	E	NatA	1	Ace(1)	Ace	SETAP	SETAPAAPAAAPPAEKAPVKKKAAKKAGGTPR	R<C13N15>	57	100	43	√				√	1.25065	0.322677	0.661682		2	33	P16403	H12_HUMAN	Histone H1.2		Ace|R<C13N15>(1)	23	1135	3
	M	S	E	NatA	1	Ace(1)	Ace	SETAP	SETAPLAPTIPAPAEKTPVKKKAKKAGATAGKR	R<C13N15>	74	100	26	√				√	0.724194	-0.465553	-1.27695		2	34	P16402	H13_HUMAN	Histone H1.3		Ace|R<C13N15>(1)	33	1232.74	3
	M	S	E	NatA	2	Ace(2)	Ace	SETAP	SETAPAAPAAPAPAEKTPVKKKAR	R	52	100	48	√				√	0.918306	-0.122954	-0.434338		2	25	P10412	H14_HUMAN	Histone H1.4		Ace|R(2)	90	1309.75	2
	M	S	E	NatA	1	Ace(1)	Ace	SETAP	SETAPAETATPAPVEKSPAKKKATKKAAGAGAAKR	R<C13N15>	56	100	44	√				√	0.753197	-0.408901	-1.13762		2	36	P16401	H15_HUMAN	Histone H1.5		Ace|R<C13N15>(1)	45	1268.07	3
	M	A	G	NatA	2	AcD3C13(2)	AcD3C13	AGGKA	AGGKAGKDSGKAKAKAVSR	R	10	9	-1						1.30896	0.388427	0.823391		2	20	Q71UI9	H2AV_HUMAN	Histone H2A.V		AcD3C13|R(2)	79	1035.12	2
	M	A	G	NatA	15	AcD3C13(15)	AcD3C13	AGGKA	AGGKAGKDSGKAKTKAVSR	R	6	5	-1						1.22873	0.297171	0.59895		2	20	P0C0S5	H2AZ_HUMAN	Histone H2A.Z		AcD3C13|R(15)	100	1050.13	2
	M	P	E	none	2	AcD3C13(2)	AcD3C13	PEPSK	PEPSKSAPAPKKGSKKAITKAQKKDGKKR	R<C13N15>	N.D.	N.D.	N.D.						1.17758	0.235825	0.448071		2	30	P33778	H2B1B_HUMAN	Histone H2B type 1-B		AcD3C13|R<C13N15>(1), AcD3C13|R(1)	64	1206.75	3
	M	P	E	none	1	AcD3C13(1)	AcD3C13	PEPTK	PEPTKSAPAPKKGSKKAVTKAQKKDGKKR	R<C13N15>	N.D.	N.D.	N.D.						N.D.				2	30	P58876	H2B1D_HUMAN	Histone H2B type 1-D		AcD3C13|R<C13N15>(1)	63	1206.75	3
	M	P	E	none	5	AcD3C13(5)	AcD3C13	PEPAK	PEPAKSAPAPKKGSKKAVTKAQKKDGKKR	R	N.D.	N.D.	N.D.						1.20118	0.264452	0.518479		2	30	O60814	H2B1K_HUMAN	Histone H2B type 1-K	P06899 (2-30), P62807 (2-30), Q16778 (2-30)	AcD3C13|R<C13N15>(3), AcD3C13|R(2)	53	1193.41	3
	M	P	E	none	1	AcD3C13(1)	AcD3C13	PELAK	PELAKSAPAPKKGSKKAVTKAQKKDGKKR	R<C13N15>	N.D.	N.D.	N.D.						1.03851	0.0545151	0.00214262		2	30	Q99880	H2B1L_HUMAN	Histone H2B type 1-L		AcD3C13|R<C13N15>(1)	57	1202.09	3
	M	P	E	none	1	AcD3C13(1)	AcD3C13	PEPSK	PEPSKSAPAPKKGSKKAVTKAQKKDGKKR	R<C13N15>	N.D.	N.D.	N.D.						N.D.				2	30	Q99877	H2B1N_HUMAN	Histone H2B type 1-N		AcD3C13|R<C13N15>(1)	40	1202.08	3
	M	P	D	none	2	AcD3C13(2)	AcD3C13	PDPAK	PDPAKSAPAPKKGSKKAVTKAQKKDGKKR	R	N.D.	N.D.	N.D.						N.D.				2	30	P23527	H2B1O_HUMAN	Histone H2B type 1-O	Q93079 (2-30)	AcD3C13|R(2)	33	891.807	4
	M	P	D	none	1	AcD3C13(1)	AcD3C13	PDPAK	PDPAKSAPAPKKGSKKAVTKVQKKDGKKR	R<C13N15>	N.D.	N.D.	N.D.						1.01201	0.0172235	-0.0895752		2	30	Q5QNW6	H2B2F_HUMAN	Histone H2B type 2-F		AcD3C13|R<C13N15>(1)	51	1201.42	3
	M	A	D	NatA	13	Ace(13)	Ace	ADKEA	ADKEAAFDDAVEER	R<C13N15>	100	100	0						1.23093	0.299751	0.605295		2	15	Q09028	RBBP4_HUMAN	Histone-binding protein RBBP4		Ace|R(9), Ace|R<C13N15>(4)	102	832.885	2
	M	A	S	NatA	17	Ace(17)	Ace	ASKEM	ASKEMFEDTVEER	R<C13N15>	100	100	0						1.09871	0.135816	0.202101		2	14	Q16576	RBBP7_HUMAN	Histone-binding protein RBBP7		Ace|R(10), Ace|R<C13N15>(7)	99	843.382	2
	M	A	A	NatA	1	Ace(1)	Ace	AAADA	AAADAEAVPAR	R<C13N15>	57.0796	99.5277	42.4481	√	√				1.28415	0.36081	0.755467		2	12	Q9H9B1	EHMT1_HUMAN	Histone-lysine N-methyltransferase EHMT1		Ace|R<C13N15>(1)	70	547.279	2
	-	M	E	NatB	4	Ace(4)	Ace	MEPLK	MEPLKVEKFATAKR	R	100	100	0						1.43913	0.525197	1.15977		1	14	Q9H7B4	SMYD3_HUMAN	Histone-lysine N-methyltransferase SMYD3		Ace|R<C13N15>(2), Ace|R(2)	61	924.024	2
	M	S	G	NatA	8	Ace(8)	Ace	SGTNL	SGTNLDGNDEFDEQLR	R<C13N15>	100	100	0						0.95199	-0.0709817	-0.306514		2	17	O43719	HTSF1_HUMAN	HIV Tat-specific factor 1		Ace|R<C13N15>(4), Ace|R(4)	111	931.408	2
	M	G	E	NatA	1	Ace(1)	Ace	GEQPI	GEQPIFSTR	R<C13N15>	69	93	24	√	√				0.875204	-0.192308	-0.604913		2	10	Q86YM7	HOME1_HUMAN	Homer protein homolog 1		Ace|R<C13N15>(1)	47	543.776	2
	M	A	S	NatA	5	Ace(5)	Ace	ASAVS	ASAVSPANLPAVLLQPR	R	100	100	0						1.0397	0.0561618	0.00619251		2	18	P51610	HCFC1_HUMAN	Host cell factor 1		Ace|R(2), Ace|R<C13N15>(3)	98	873.5	2
	R	M	E	NatB	1	Ace(1)	Ace	MEQFQ	MEQFQKEKEELDR	R	91	N.D.	N.D.						N.D.				40	52	Q16543	CDC37_HUMAN	Hsp90 co-chaperone Cdc37		Ace|R(1)	70	931.451	2
	-	M	N	NatB or other	3	Ace(3)	Ace	MNSIK	MNSIKNVPAR	R	100	100	0						1.08577	0.118719	0.16005		1	10	O75146	HIP1R_HUMAN	Huntingtin-interacting protein 1-related protein		Ace|R<C13N15>(1), Ace|R(2)	91	617.832	2
	M	S	F	NatA	1	Ace(1)	Ace	SFPKA	SFPKAPLKR	R	100	100	0						0.73383	-0.446482	-1.23005		2	10	O75330	HMMR_HUMAN	Hyaluronan mediated motility receptor		Ace|R(1)	37	590.363	2
	-	M	L	NatC or other	4	Ace(2), AcD3C13(2)	Ace	MLPNT	MLPNTGR	R	57	51	-6						1.0299	0.0425022	-0.0274028		1	7	Q6YN16	HSDL2_HUMAN	Hydroxysteroid dehydrogenase-like protein 2		Ace|R(2), AcD3C13|R(1), AcD3C13|R<C13N15>(1)	52	423.711	2
	M	A	A	NatA	3	Ace(3)	Ace	AATAA	AATAAEAVASGSGEPR	R<C13N15>	100	100	0						0.828667	-0.271136	-0.79879		2	17	Q9NWT6	HIF1N_HUMAN	Hypoxia-inducible factor 1-alpha inhibitor		Ace|R<C13N15>(2), Ace|R(1)	86	748.865	2
	-	M	E	NatB	2	Ace(2)	Ace	MEVQK	MEVQKEAQR	R<C13N15>	100	100	0						1.68457	0.75238	1.71853		1	9	Q9BTL4	IER2_HUMAN	Immediate early response gene 2 protein		Ace|R(1), Ace|R<C13N15>(1)	72	617.31	2
	M	A	A	NatA	2	Ace(2)	Ace	AAEDE	AAEDELQLPR	R	93	100	7	√			√		0.552163	-0.856833	-2.2393		2	11	P78318	IGBP1_HUMAN	Immunoglobulin-binding protein 1		Ace|R<C13N15>(1), Ace|R(1)	66	592.302	2
	M	S	T	NatA	4	Ace(4)	Ace	STNEN	STNENANTPAAR	R<C13N15>	100	100	0						0.932288	-0.101153	-0.38072		2	13	P52292	IMA1_HUMAN	Importin subunit alpha-1		Ace|R(2), Ace|R<C13N15>(2)	84	649.304	2
	M	A	D	NatA	6	Ace(6)	Ace	ADNEK	ADNEKLDNQR	R<C13N15>	100	100	0						0.610564	-0.711786	-1.88256		2	11	O00629	IMA3_HUMAN	Importin subunit alpha-3		Ace|R<C13N15>(3), Ace|R(3)	60	651.319	2
	-	M	T	other	2	Ace(2)	Ace	MTTPG	MTTPGKENFR	R	100	100	0						1.30498	0.384028	0.812572		1	10	P52294	IMA5_HUMAN	Importin subunit alpha-5		Ace|R(1), Ace|R<C13N15>(1)	58	643.313	2
	M	T	T	NatA	2	Ace(2)	Ace	TTPGK	TTPGKENFR	R	100	100	0						1.20455	0.268494	0.52842		2	10	P52294	IMA5_HUMAN	Importin subunit alpha-5		Ace|R(2)	35	569.797	2
	M	A	S	NatA	1	Ace(1)	Ace	ASPGK	ASPGKDNYR	R<C13N15>	100	100	0						1.12344	0.167923	0.281067		2	10	O15131	IMA6_HUMAN	Importin subunit alpha-6	O60684 (5-13)	Ace|R<C13N15>(1)	34	553.776	2
	-	M	E	NatB	9	Ace(9)	Ace	METMA	METMASPGKDNYR	R	100	100	0						1.04816	0.067859	0.0349615		1	13	O60684	IMA7_HUMAN	Importin subunit alpha-7		Ace|R(4), Ace|R<C13N15>(5)	71	810.853	2
	-	M	E	NatB	4	Ace(4)	Ace	MESAG	MESAGLEQLLR	R<C13N15>	100	100	0						0.567803	-0.816537	-2.14019		1	11	Q8TEX9	IPO4_HUMAN	Importin-4		Ace|R<C13N15>(2), Ace|R(2)	91	657.834	2
	-	M	D	NatB	8	Ace(8)	Ace	MDPNT	MDPNTIIEALR	R	100	100	0						0.715298	-0.483385	-1.32081		1	11	O95373	IPO7_HUMAN	Importin-7		Ace|R<C13N15>(4), Ace|R(4)	98	665.837	2
	M	P	E	none	5	AcD3C13(5)	AcD3C13	PENPA	PENPATDKLQVLQVLDR	R<C13N15>	0	0	0						0.643934	-0.635015	-1.69374		2	18	Q8NI35	INADL_HUMAN	InaD-like protein		AcD3C13|R<C13N15>(3), AcD3C13|R(2)	102	1020.57	2
	M	A	A	NatA	4	Ace(4)	Ace	AAAAA	AAAAASAPQQLSDEELFSQLR	R<C13N15>	100	100	0						1.78584	0.836599	1.92566		2	22	Q9Y2U8	MAN1_HUMAN	Inner nuclear membrane protein Man1		Ace|R(3), Ace|R<C13N15>(1)	73	1128.06	2
	M	A	A	NatA	2	Ace(2)	Ace	AAQIP	AAQIPIVATTSTPGIVR	R<C13N15>	93	100	7	√					1.0566	0.0794345	0.0634313		2	18	Q6PI98	IN80C_HUMAN	INO80 complex subunit C		Ace|R(1), Ace|R<C13N15>(1)	70	874.003	2
	-	M	N	NatB or other	2	Ace(2)	Ace	MNGPA	MNGPADGEVDYKKKYR	R	100	100	0						1.0845	0.11703	0.155897		1	16	Q8NBZ0	IN80E_HUMAN	INO80 complex subunit E		Ace|R(1), Ace|R<C13N15>(1)	88	1035.52	2
	M	S	G	NatA	2	Ace(2)	Ace	SGFST	SGFSTEER	R	99.8069	99.8527	0.0458098						0.98743	-0.0182496	-0.176821		2	9	Q15181	IPYR_HUMAN	Inorganic pyrophosphatase		Ace|R<C13N15>(1), Ace|R(1)	55	477.712	2
	-	M	A	other	1	AcD3C13(1)	AcD3C13	MAPMG	MAPMGIR	R	22	17	-5						0.81301	-0.298655	-0.866472		1	7	Q9NX62	IMPA3_HUMAN	Inositol monophosphatase 3		AcD3C13|R(1)	36	427.714	2
	-	M	Q	NatB or other	9	AcD3C13(7), Ace(2)	AcD3C13	MQTFL	MQTFLKGKR	R<C13N15>	28	26	-2						1.1728	0.229957	0.433638		1	9	Q13572	ITPK1_HUMAN	Inositol-tetrakisphosphate 1-kinase		AcD3C13|R(4), AcD3C13|R<C13N15>(3), Ace|R(2)	79	638.374	2
	M	T	L	NatA	1	AcD3C13(1)	AcD3C13	TLPGG	TLPGGPTGMAR	R	12	33	21	√					2.28987	1.19527	2.8078	99% siNatA	2	12	P23677	IP3KA_HUMAN	Inositol-trisphosphate 3-kinase A		AcD3C13|R(1)	36	560.792	2
	-	M	M	other	1	AcD3C13(1)	AcD3C13	MMNKL	MMNKLYIGNLSPAVTADDLR	R<C13N15>	N.D.	N.D.	N.D.						N.D.				1	20	Q9Y6M1	IF2B2_HUMAN	Insulin-like growth factor 2 mRNA-binding protein 2		AcD3C13|R<C13N15>(1)	31	786.739	3
	M	M	N	NatB or other	3	Ace(3)	Ace	MNKLY	MNKLYIGNLSPAVTADDLR	R<C13N15>	100	N.D.	N.D.						N.D.				2	20	Q9Y6M1	IF2B2_HUMAN	Insulin-like growth factor 2 mRNA-binding protein 2		Ace|R(2), Ace|R<C13N15>(1)	94	1103.57	2
	M	S	A	NatA	2	Ace(2)	Ace	SAQGD	SAQGDCEFLVQR	R	100	100	0						1.24561	0.316852	0.647356		2	13	Q9NVR2	INT10_HUMAN	Integrator complex subunit 10		Ace|R(1), Ace|R<C13N15>(1)	74	726.333	2
	-	M	E	NatB	3	Ace(3)	Ace	MELQK	MELQKGKGAAAAAAASGAAGGGGGGAGAGAPGGGR	R	100	100	0						1.15551	0.20853	0.380938		1	35	Q68E01	INT3_HUMAN	Integrator complex subunit 3		Ace|R(3)	118	730.616	4
	-	M	D	NatB	4	Ace(4)	Ace	MDLFG	MDLFGDLPEPER	R	100	100	0						1.10383	0.142511	0.218568		1	12	Q9H0C8	ILKAP_HUMAN	Integrin-linked kinase-associated serine/threonine phosphatase 2C		Ace|R(2), Ace|R<C13N15>(2)	65	738.838	2
	-	M	D	NatB	4	Ace(4)	Ace	MDDIF	MDDIFTQCR	R<C13N15>	100	100	0						1.02868	0.0407943	-0.0316035		1	9	Q13418	ILK_HUMAN	Integrin-linked protein kinase		Ace|R(2), Ace|R<C13N15>(2)	80	627.262	2
	M	A	S	NatA	3	Ace(3)	Ace	ASVQA	ASVQASR	R	100	100	0						1.44081	0.52688	1.16391		2	8	Q8IU81	I2BP1_HUMAN	Interferon regulatory factor 2-binding protein 1		Ace|R(2), Ace|R<C13N15>(1)	55	380.701	2
	M	A	A	NatA	4	Ace(4)	Ace	AAAVA	AAAVAVAAASR	R<C13N15>	100	100	0						1.63513	0.709405	1.61283		2	12	Q7Z5L9	I2BP2_HUMAN	Interferon regulatory factor 2-binding protein 2		Ace|R(2), Ace|R<C13N15>(2)	77	505.287	2
	M	S	A	NatA	2	Ace(2)	Ace	SAAQV	SAAQVSSSR	R	100	100	0						1.49428	0.579451	1.29321		2	10	Q9H1B7	I2BPL_HUMAN	Interferon regulatory factor 2-binding protein-like		Ace|R(1), Ace|R<C13N15>(1)	61	467.733	2
	M	S	N	NatA	2	Ace(2)	Ace	SNGYS	SNGYSTDENFR	R	100	100	0						1.54867	0.63103	1.42007		2	12	Q9BYX4	IFIH1_HUMAN	Interferon-induced helicase C domain-containing protein 1		Ace|R(1), Ace|R<C13N15>(1)	69	666.279	2
	M	S	E	NatA	4	Ace(4)	Ace	SENNK	SENNKNSLESSLR	R	100	100	0						2.13321	1.09303	2.55635		2	14	P09913	IFIT2_HUMAN	Interferon-induced protein with tetratricopeptide repeats 2		Ace|R(3), Ace|R<C13N15>(1)	75	783.89	2
	M	A	G	NatA	2	Ace(2)	Ace	AGDLS	AGDLSAGFFMEELNTYR	R<C13N15>	94	100	6	√					1.67545	0.744553	1.69928		2	18	P19525	E2AK2_HUMAN	Interferon-induced, double-stranded RNA-activated protein kinase		Ace|R(1), Ace|R<C13N15>(1)	84	994.951	2
	M	P	K	none	1	AcD3C13(1)	AcD3C13	PKNKK	PKNKKR	R<C13N15>	0	0	0						0.60453	-0.726114	-1.9178		2	7	O00458	IFRD1_HUMAN	Interferon-related developmental regulator 1	Q9BX63 (574-579)	AcD3C13|R<C13N15>(1)	40	484.83	2
	-	M	N	NatB or other	3	Ace(3)	Ace	MNKPI	MNKPITPSTYVR	R	100	100	0						1.72714	0.788385	1.80708		1	12	Q9NWZ3	IRAK4_HUMAN	Interleukin-1 receptor-associated kinase 4		Ace|R(2), Ace|R<C13N15>(1)	41	756.396	2
	-	M	E	NatB	2	Ace(2)	Ace	MEDLL	MEDLLDLDEELR	R	100	100	0						1.03216	0.0456666	-0.01962		1	12	Q96FT9	IFT43_HUMAN	Intraflagellar transport protein 43 homolog		Ace|R(1), Ace|R<C13N15>(1)	68	774.858	2
	R	M	E	NatB	2	Ace(2)	Ace	MEKEL	MEKELR	R<C13N15>	100	100	0						1.3031	0.381948	0.807456		1	6	Q9Y366	IFT52_HUMAN	Intraflagellar transport protein 52 homolog	Q9UIF8 (955-960)	Ace|R(1), Ace|R<C13N15>(1)	42	460.74	2
	M	T	A	NatA	2	Ace(2)	Ace	TAALA	TAALAVVTTSGLEDGVPR	R<C13N15>	97	100	3						0.60377	-0.727929	-1.92226		2	19	Q9NWB7	IFT57_HUMAN	Intraflagellar transport protein 57 homolog		Ace|R<C13N15>(1), Ace|R(1)	79	904.986	2
	M	S	V	NatA	2	Ace(2)	Ace	SVKEG	SVKEGAQR	R	100	100	0						1.26181	0.335495	0.693206		2	9	Q27J81	INF2_HUMAN	Inverted formin-2		Ace|R(1), Ace|R<C13N15>(1)	54	482.264	2
	-	M	K	other	2	AcD3C13(2)	AcD3C13	MKPTG	MKPTGTDPR	R<C13N15>	4.61746	4.43573	-0.18173						1.63296	0.707489	1.60812		1	9	Q15051	IQCB1_HUMAN	IQ calmodulin-binding motif-containing protein 1		AcD3C13|R(1), AcD3C13|R<C13N15>(1)	40	561.793	2
	M	S	K	NatA	20	Ace(20)	Ace	SKKIS	SKKISGGSVVEMQGDEMTR	R	95	100	5	√					1.13982	0.188807	0.332431		2	20	O75874	IDHC_HUMAN	Isocitrate dehydrogenase [NADP] cytoplasmic		Ace|R(11), Ace|R<C13N15>(9)	152	1104.04	2
	-	M	L	NatC or other	7	Ace(7)	Ace	MLGSG	MLGSGFKAER	R	100	100	0						1.3894	0.474458	1.03498		1	10	P53990	IST1_HUMAN	IST1 homolog		Ace|R<C13N15>(4), Ace|R(3)	88	600.805	2
	M	A	E	NatA	2	Ace(2)	Ace	AEAAL	AEAALEAVR	R<C13N15>	100	100	0						0.62091	-0.687544	-1.82294		2	10	P0C870	JMJD7_HUMAN	JmjC domain-containing protein 7		Ace|R<C13N15>(1), Ace|R(1)	70	491.265	2
	-	M	N	NatB or other	2	Ace(2)	Ace	MNLAE	MNLAEICDNAKKGR	R	100	100	0						0.95212	-0.0707847	-0.30603		1	14	Q9BW62	KATL1_HUMAN	Katanin p60 ATPase-containing subunit A-like 1		Ace|R(1), Ace|R<C13N15>(1)	54	886.442	2
	M	G	K	NatA	1	AcD3C13(1)	AcD3C13	GKKGK	GKKGKKEKKGR	R	0	0	0						0.80078	-0.320522	-0.920254		2	12	Q8TBB5	KLDC4_HUMAN	Kelch domain-containing protein 4		AcD3C13|R(1)	64	787.028	2
	M	S	A	NatA	1	Ace(1)	Ace	SAEEM	SAEEMVQIR	R	N.D.	N.D.	N.D.						N.D.				2	10	Q9P2K6	KLH42_HUMAN	Kelch-like protein 42		Ace|R(1)	40	560.769	2
	M	A	A	NatA	1	Ace(1)	Ace	AASGV	AASGVEKSSKKKTEKKLAAR	R	55	100	45	√				√	0.670379	-0.576952	-1.55094		2	21	Q8IXQ5	KLHL7_HUMAN	Kelch-like protein 7		Ace|R(1)	37	814.83	3
	M	T	T	NatA	2	Ace(2)	Ace	TTTFL	TTTFLQTSSSTFGGGSTR	R	100	100	0						1.90575	0.930359	2.15626		2	19	P19012	K1C15_HUMAN	Keratin, type I cytoskeletal 15		Ace|R(1), Ace|R<C13N15>(1)	108	939.448	2
	M	A	S	NatA	7	Ace(7)	Ace	ASTST	ASTSTTIR	R	100	100	0						1.77876	0.830873	1.91158		2	9	P02538	K2C6A_HUMAN	Keratin, type II cytoskeletal 6A	P04259 (2-9), P48668 (2-9)	Ace|R(5), Ace|R<C13N15>(2)	65	439.733	2
	M	A	M	NatA	1	Ace(1)	Ace	AMMVF	AMMVFPR	R<C13N15>	100	100	0						0.55309	-0.854414	-2.23335		2	8	Q9H0B6	KLC2_HUMAN	Kinesin light chain 2		Ace|R<C13N15>(1)	32	468.221	2
	M	S	V	NatA	1	Ace(1)	Ace	SVQVA	SVQVAAPGSAGLGPER	R	N.D.	N.D.	N.D.						N.D.				2	17	Q6P597	KLC3_HUMAN	Kinesin light chain 3		Ace|R(1)	75	769.402	2
	M	S	G	NatA	2	Ace(2)	Ace	SGLVL	SGLVLGQR	R	95	100	5	√					1.08244	0.114291	0.149159		2	9	Q9NSK0	KLC4_HUMAN	Kinesin light chain 4		Ace|R(1), Ace|R<C13N15>(1)	52	436.253	2
	M	A	D	NatA	3	Ace(3)	Ace	ADLAE	ADLAECNIKVMCR	R	100	100	0						0.681667	-0.552862	-1.49169		2	14	P33176	KINH_HUMAN	Kinesin-1 heavy chain		Ace|R<C13N15>(1), Ace|R(2)	95	842.894	2
	M	A	S	NatA	2	Ace(2)	Ace	ASQPN	ASQPNSSAKKKEEKGKNIQVVVR	R	93	100	7	√					1.04088	0.0578015	0.0102254		2	24	P52732	KIF11_HUMAN	Kinesin-like protein KIF11		Ace|R(1), Ace|R<C13N15>(1)	45	934.874	3
	M	S	D	NatA	2	Ace(2)	Ace	SDTKV	SDTKVKVAVR	R	≥96	100	N.D.						1.16279	0.217591	0.403225		2	11	Q9H1H9	KI13A_HUMAN	Kinesin-like protein KIF13A		Ace|R(1), Ace|R<C13N15>(1)	36	619.874	2
	M	G	D	NatA	4	Ace(4)	Ace	GDSKV	GDSKVKVAVR	R<C13N15>	100	100	0						1.28781	0.364925	0.76559		2	11	Q9NQT8	KI13B_HUMAN	Kinesin-like protein KIF13B		Ace|R<C13N15>(2), Ace|R(2)	61	602.865	2
	M	A	S	NatA	1	Ace(1)	Ace	ASVKV	ASVKVAVR	R<C13N15>	100	100	0						1.0295	0.0419438	-0.0287762		2	9	Q96L93	KI16B_HUMAN	Kinesin-like protein KIF16B	O60333 (4-11), Q12756 (4-11), O43896 (4-11)	Ace|R<C13N15>(1)	29	464.793	2
	-	M	E	NatB	1	Ace(1)	Ace	MESNF	MESNFNQEGVPR	R	100	100	0						2.14792	1.10294	2.58072	99% siNatA	1	12	Q96Q89	KI20B_HUMAN	Kinesin-like protein KIF20B		Ace|R(1)	54	733.323	2
	-	M	L	NatC or other	2	Ace(2)	Ace	MLGAP	MLGAPDESSVR	R<C13N15>	93.1793	98.2771	5.0978		√				1.04805	0.0677032	0.0345786		1	11	Q7Z4S6	KI21A_HUMAN	Kinesin-like protein KIF21A		Ace|R<C13N15>(1), Ace|R(1)	80	615.289	2
	-	M	E	NatB	1	Ace(1)	Ace	MEEIP	MEEIPVKVAVR	R	100	100	0						1.14609	0.19672	0.351893		1	11	Q86VH2	KIF27_HUMAN	Kinesin-like protein KIF27		Ace|R(1)	40	688.384	2
	M	A	M	NatA	3	Ace(3)	Ace	AMDSS	AMDSSLQAR	R<C13N15>	95	100	5	√					0.982407	-0.0256067	-0.194915		2	10	Q99661	KIF2C_HUMAN	Kinesin-like protein KIF2C		Ace|R(1), Ace|R<C13N15>(2)	57	523.744	2
	M	S	K	NatA	2	Ace(2)	Ace	SKLKS	SKLKSSESVR	R	100	100	0						0.99692	-0.00445036	-0.142882		2	11	O15066	KIF3B_HUMAN	Kinesin-like protein KIF3B		Ace|R<C13N15>(1), Ace|R(1)	71	628.861	2
	-	M	E	NatB	4	Ace(4)	Ace	METLS	METLSFPR	R<C13N15>	100	100	0						1.05077	0.0714469	0.043786		1	8	Q9BZD4	NUF2_HUMAN	Kinetochore protein Nuf2		Ace|R(2), Ace|R<C13N15>(2)	65	524.754	2
	-	M	D	NatB	2	Ace(2)	Ace	MDLPD	MDLPDSASR	R<C13N15>	100	100	0						1.23277	0.301904	0.61059		1	9	Q9BQD3	KXDL1_HUMAN	KxDL motif-containing protein 1		Ace|R(1), Ace|R<C13N15>(1)	79	530.236	2
	-	M	E	NatB	1	Ace(1)	Ace	MEPSS	MEPSSLELPADTVQR	R<C13N15>	100	100	0						1	0	-0.131936		1	15	Q16719	KYNU_HUMAN	Kynureninase		Ace|R<C13N15>(1)	45	870.921	2
	M	A	K	NatA	2	Ace(2)	Ace	AKQLQ	AKQLQAR	R	100	100	0						1.31061	0.390238	0.827847		2	8	Q16773	KAT1_HUMAN	Kynurenine--oxoglutarate transaminase 1		Ace|R(1), Ace|R<C13N15>(1)	49	452.272	2
	M	A	E	NatA	1	Ace(1)	Ace	AEPQP	AEPQPPSGGLTDEAALSCCSDADPSTKDFLLQQTMLR	R	100	100	0						0.99422	-0.00836297	-0.152505		2	38	Q04760	LGUL_HUMAN	Lactoylglutathione lyase		Ace|R(1)	26	1028.73	4
	M	P	E	none	1	AcD3C13(1)	AcD3C13	PEFLE	PEFLEDPSVLTKDKLKSELVANNVTLPAGEQR	R	0	0	0						1.47069	0.556493	1.23675		2	33	P42166	LAP2A_HUMAN	Lamina-associated polypeptide 2, isoform alpha	P42167 (2-33)	AcD3C13|R(1)	31	932.262	4
	M	A	T	NatA	1	Ace(1)	Ace	ATATP	ATATPVPPR	R	100	100	0						2.77092	1.47037	3.4844	99% siNatA	2	10	P20700	LMNB1_HUMAN	Lamin-B1		Ace|R(1)	37	476.267	2
	-	M	G	other	1	Ace(1)	Ace	MGETM	MGETMSKR	R	100	100	0						N.D.				1	8	Q9NS86	LANC2_HUMAN	LanC-like protein 2		Ace|R(1)	32	530.741	2
	-	M	T	other	10	Ace(10)	Ace	MTSDQ	MTSDQDAKVVAEPQTQR	R	100	100	0						1.31007	0.389645	0.826388		1	17	Q92615	LAR4B_HUMAN	La-related protein 4B		Ace|R(8), Ace|R<C13N15>(2)	80	1004.98	2
	M	T	S	NatA	4	AcD3C13(4)	AcD3C13	TSDQD	TSDQDAKVVAEPQTQR	R	4	18	14	√					1.45451	0.540534	1.19749		2	17	Q92615	LAR4B_HUMAN	La-related protein 4B		AcD3C13|R(2), AcD3C13|R<C13N15>(2)	76	933.979	2
	M	A	G	NatA	4	Ace(2), AcD3C13(2)	AcD3C13	AGAGP	AGAGPKR	R	67	100	33	√					1.18817	0.248744	0.479844		2	8	Q01650	LAT1_HUMAN	Large neutral amino acids transporter small subunit 1	Q8MH63 (2-8), Q9GIP4 (2-8)	Ace|R<C13N15>(2), AcD3C13|R(2)	42	375.732	2
	-	M	E	NatB	1	Ace(1)	Ace	MEPND	MEPNDSTSTAVEEPDSLEVLVKTLDSQTR	R	100	100	0						1.02372	0.0338212	-0.0487537		1	29	P46379	BAG6_HUMAN	Large proline-rich protein BAG6		Ace|R(1)	48	1099.53	3
	M	A	G	NatA	2	Ace(2)	Ace	AGLSD	AGLSDLELR	R<C13N15>	92	100	8	√					2.15968	1.11082	2.60009	99% siNatA	2	10	Q8NC56	LEMD2_HUMAN	LEM domain-containing protein 2		Ace|R(1), Ace|R<C13N15>(1)	66	513.279	2
	M	A	E	NatA	4	Ace(4)	Ace	AEFTS	AEFTSYKETASSR	R	100	100	0						1.33578	0.417682	0.895345		2	14	Q86V48	LUZP1_HUMAN	Leucine zipper protein 1		Ace|R(2), Ace|R<C13N15>(2)	76	783.376	2
	-	M	G	other	1	AcD3C13(1)	AcD3C13	MGPLS	MGPLSAR	R	0	0	0						0.92294	-0.115691	-0.416476		1	7	Q9UFC0	LRWD1_HUMAN	Leucine-rich repeat and WD repeat-containing protein 1		AcD3C13|R(1)	34	397.713	2
	-	M	T	other	3	Ace(3)	Ace	MTSPA	MTSPAAAQSR	R<C13N15>	100	100	0						0.608661	-0.716288	-1.89363		1	10	Q32MZ4	LRRF1_HUMAN	Leucine-rich repeat flightless-interacting protein 1		Ace|R<C13N15>(2), Ace|R(1)	52	544.257	2
	M	T	S	NatA	5	Ace(5)	Ace	TSPAA	TSPAAAQSR	R<C13N15>	92	100	8	√					0.742045	-0.430421	-1.19055		2	10	Q32MZ4	LRRF1_HUMAN	Leucine-rich repeat flightless-interacting protein 1		Ace|R(3), Ace|R<C13N15>(2)	68	470.739	2
	-	M	T	other	2	Ace(2)	Ace	MTEES	MTEESSDVPR	R<C13N15>	100	100	0						0.63589	-0.653151	-1.73835		1	10	Q5VZK9	LR16A_HUMAN	Leucine-rich repeat-containing protein 16A		Ace|R(1), Ace|R<C13N15>(1)	54	609.763	2
	M	T	E	NatA	4	Ace(2), AcD3C13(2)	Ace	TEESS	TEESSDVPR	R	62	93	31	√					1.29672	0.374867	0.790041		2	10	Q5VZK9	LR16A_HUMAN	Leucine-rich repeat-containing protein 16A		Ace|R<C13N15>(1), AcD3C13|R(1), Ace|R(1), AcD3C13|R<C13N15>(1)	41	531.241	2
	-	M	T	other	1	Ace(1)	Ace	MTKAG	MTKAGSKGGNLR	R<C13N15>	100	100	0						0.94825	-0.0766606	-0.320481		1	12	Q96AG4	LRC59_HUMAN	Leucine-rich repeat-containing protein 59		Ace|R<C13N15>(1)	53	691.376	2
	M	T	K	NatA	3	AcD3C13(1), Ace(2)	Ace	TKAGS	TKAGSKGGNLR	R	31	71	40	√	√	√		√	1.37567	0.460133	0.999751		2	12	Q96AG4	LRC59_HUMAN	Leucine-rich repeat-containing protein 59		AcD3C13|R(1), Ace|R<C13N15>(1), Ace|R(1)	81	612.854	2
	-	M	I	NatC or other	2	Ace(2)	Ace	MIPVT	MIPVTELR	R<C13N15>	100	100	0						0.9095	-0.136854	-0.468527		1	8	Q8IWT6	LRC8A_HUMAN	Leucine-rich repeat-containing protein 8A		Ace|R(1), Ace|R<C13N15>(1)	71	513.78	2
	-	M	I	NatC or other	2	Ace(2)	Ace	MIPVT	MIPVTEFR	R	100	100	0						0.42874	-1.22183	-3.13699	99% siCTR	1	8	Q8TDW0	LRC8C_HUMAN	Leucine-rich repeat-containing protein 8C		Ace|R<C13N15>(1), Ace|R(1)	48	525.768	2
	M	A	G	NatA	2	Ace(2)	Ace	AGPGS	AGPGSTGGQIGAAALAGGAR	R<C13N15>	89	100	11	√					0.702931	-0.508545	-1.38269		2	21	Q8N653	LZTR1_HUMAN	Leucine-zipper-like transcriptional regulator 1		Ace|R(1), Ace|R<C13N15>(1)	92	846.438	2
	-	M	E	NatB	2	Ace(2)	Ace	MEPFT	MEPFTNDR	R	100	100	0						1.01325	0.0189902	-0.0852302		1	8	Q9UIQ6	LCAP_HUMAN	Leucyl-cystinyl aminopeptidase		Ace|R<C13N15>(1), Ace|R(1)	61	534.227	2
	-	M	E	NatB	12	Ace(12)	Ace	MEQLS	MEQLSSANTR	R	100	100	0						0.98144	-0.027028	-0.198411		1	10	P30740	ILEU_HUMAN	Leukocyte elastase inhibitor		Ace|R(7), Ace|R<C13N15>(5)	89	597.774	2
	M	A	A	NatA	2	Ace(2)	Ace	AANVG	AANVGDQR	R<C13N15>	100	100	0						1.2441	0.315102	0.643052		2	9	Q96PV6	LENG8_HUMAN	Leukocyte receptor cluster member 8		Ace|R(1), Ace|R<C13N15>(1)	60	441.719	2
	M	P	E	none	4	AcD3C13(4)	AcD3C13	PEIVD	PEIVDTCSLASPASVCR	R<C13N15>	0	0	0						0.92988	-0.104884	-0.389895		2	18	P09960	LKHA4_HUMAN	Leukotriene A-4 hydrolase		AcD3C13|R(2), AcD3C13|R<C13N15>(2)	81	959.965	2
	M	A	N	NatA	2	Ace(2)	Ace	ANALA	ANALASATCER	R<C13N15>	100	100	0						0.594839	-0.74943	-1.97514		2	11	P48059	LIMS1_HUMAN	LIM and senescent cell antigen-like-containing domain protein 3	P0CW20 (64-74), P0CW19 (64-74)	Ace|R<C13N15>(1), Ace|R(1)	66	608.287	2
	-	M	E	NatB	3	Ace(3)	Ace	MESSP	MESSPFNR	R	100	100	0						1.15047	0.202219	0.365418		1	8	Q9UHB6	LIMA1_HUMAN	LIM domain and actin-binding protein 1		Ace|R<C13N15>(1), Ace|R(2)	54	513.221	2
	M	S	S	NatA	1	Ace(1)	Ace	SSVSP	SSVSPIQIPSR	R	100	100	0						1.46875	0.554589	1.23206		2	12	Q86WA8	LONP2_HUMAN	Lon protease homolog 2, peroxisomal		Ace|R(1)	33	606.833	2
	-	M	D	NatB	4	Ace(4)	Ace	MDALK	MDALKSAGR	R	100	100	0						1.13356	0.180854	0.312871		1	9	Q5SW96	ARH_HUMAN	Low density lipoprotein receptor adapter protein 1		Ace|R<C13N15>(2), Ace|R(2)	79	527.271	2
	-	M	K	other	1	Ace(1)	Ace	MKTAE	MKTAENIR	R<C13N15>	N.D.	N.D.	N.D.						N.D.				1	8	Q8IV42	PSTK_HUMAN	L-seryl-tRNA(Sec) kinase		Ace|R<C13N15>(1)	42	539.283	2
	M	A	G	NatA	4	Ace(4)	Ace	AGAGP	AGAGPTMLLR	R	100	100	0						0.87923	-0.185687	-0.588631		2	11	Q9BRA0	LSMD1_HUMAN	LSM domain-containing protein 1		Ace|R<C13N15>(2), Ace|R(2)	61	522.779	2
	-	M	I	NatC or other	2	Ace(2)	Ace	MISAA	MISAAQLLDELMGR	R	100	100	0						1.07536	0.10482	0.125866		1	14	O95232	LC7L3_HUMAN	Luc7-like protein 3		Ace|R<C13N15>(1), Ace|R(1)	68	811.4	2
	-	M	E	NatB	7	Ace(5), AcD3C13(2)	Ace	MELFL	MELFLAGR	R	97	95	-2						1.00495	0.00712443	-0.114414		1	8	Q7Z4W1	DCXR_HUMAN	L-xylulose reductase		Ace|R(3), Ace|R<C13N15>(2), AcD3C13|R<C13N15>(2)	65	497.755	2
	M	A	A	NatA	11	Ace(11)	Ace	AAVQA	AAVQAAEVKVDGSEPKLSKNELKR	R	100	100	0						0.914275	-0.1293	-0.449947		2	25	Q15046	SYK_HUMAN	Lysine--tRNA ligase		Ace|R(10), Ace|R<C13N15>(1)	103	1399.29	2
	M	A	D	NatA	2	Ace(2)	Ace	ADSSP	ADSSPALSLR	R	100	100	0						1.27268	0.34787	0.723642		2	11	Q8IV50	LYSM2_HUMAN	LysM and putative peptidoglycan-binding domain-containing protein 2		Ace|R(1), Ace|R<C13N15>(1)	50	529.777	2
	M	A	A	NatA	5	Ace(5)	Ace	AAASG	AAASGSVLQR	R	100	100	0						1.08479	0.117409	0.156829		2	11	Q5VWZ2	LYPL1_HUMAN	Lysophospholipase-like protein 1		Ace|R(2), Ace|R<C13N15>(3)	101	501.272	2
	M	A	D	NatA	2	Ace(2)	Ace	ADAAP	ADAAPQLGKR	R<C13N15>	100	100	0						1.00499	0.00718115	-0.114274		2	11	Q96C86	DCPS_HUMAN	m7GpppX diphosphatase		Ace|R<C13N15>(1), Ace|R(1)	76	563.316	2
	-	M	P	none	1	AcD3C13(1)	AcD3C13	MPMFI	MPMFIVNTNVPR	R<C13N15>	0	0	0						0.99598	-0.00581132	-0.146229		1	12	P14174	MIF_HUMAN	Macrophage migration inhibitory factor		AcD3C13|R<C13N15>(1)	50	754.385	2
	M	P	M	none	25	AcD3C13(25)	AcD3C13	PMFIV	PMFIVNTNVPR	R	0	0	0						1.21043	0.27552	0.545699		2	12	P14174	MIF_HUMAN	Macrophage migration inhibitory factor		AcD3C13|R(14), AcD3C13|R<C13N15>(11)	76	675.863	2
	M	A	T	NatA	3	Ace(2), AcD3C13(1)	Ace	ATEEF	ATEEFIIR	R	85	100	15	√					1.80743	0.853942	1.96832		2	9	Q14764	MVP_HUMAN	Major vault protein		Ace|R(1), Ace|R<C13N15>(1), AcD3C13|R(1)	54	510.772	2
	-	M	Q	NatB or other	2	Ace(2)	Ace	MQAGK	MQAGKPILYSYFR	R	100	100	0						1.14111	0.190438	0.336442		1	13	O43708	MAAI_HUMAN	Maleylacetoacetate isomerase		Ace|R<C13N15>(1), Ace|R(1)	80	839.934	2
	-	M	D	NatB	2	Ace(2)	Ace	MDDKP	MDDKPNPEALSDSSER	R	100	100	0						0.735065	-0.444056	-1.22408		1	16	Q3LIE5	ADPRM_HUMAN	Manganese-dependent ADP-ribose/CDP-alcohol diphosphatase		Ace|R(2)	65	948.418	2
	-	M	D	NatB	2	Ace(2)	Ace	MDGET	MDGETAEEQGGPVPPPVAPGGPGLGGAPGGR	R	100	100	0						0.88494	-0.176348	-0.565661		1	31	Q16644	MAPK3_HUMAN	MAP kinase-activated protein kinase 3		Ace|R(1), Ace|R<C13N15>(1)	60	957.119	3
	M	V	Q	NatA	1	AcD3C13(1)	AcD3C13	VQKKK	VQKKKFCPR	R	0	0	0						1.1732	0.230449	0.434848		2	10	Q8WXG6	MADD_HUMAN	MAP kinase-activating death domain protein		AcD3C13|R(1)	34	689.918	2
	-	M	M	other	2	Ace(2)	Ace	MMADG	MMADGAAAGAGGSPSLR	R<C13N15>	100	100	0						1.0735	0.102322	0.119723		1	17	Q8IWC1	MA7D3_HUMAN	MAP7 domain-containing protein 3		Ace|R<C13N15>(1), Ace|R(1)	93	802.358	2
	M	S	K	NatA	8	Ace(8)	Ace	SKSFQ	SKSFQQSSLSR	R<C13N15>	100	100	0						1.12777	0.173473	0.294717		2	12	P43243	MATR3_HUMAN	Matrin-3		Ace|R(4), Ace|R<C13N15>(4)	72	677.353	2
	M	S	I	NatA	3	Ace(2), AcD3C13(1)	Ace	SIETL	SIETLLEAAR	R<C13N15>	63	100	37	√					1.40377	0.48931	1.07151		2	11	Q99583	MNT_HUMAN	Max-binding protein MNT		Ace|R(1), Ace|R<C13N15>(1), AcD3C13|R(1)	61	577.818	2
	M	A	T	NatA	4	Ace(4)	Ace	ATYSL	ATYSLANER	R	100	100	0						0.842995	-0.246404	-0.737962		2	10	Q9P086	MED11_HUMAN	Mediator of RNA polymerase II transcription subunit 11		Ace|R<C13N15>(2), Ace|R(2)	65	533.762	2
	-	M	V	other	3	AcD3C13(1), Ace(2)	Ace	MVPGS	MVPGSEGPAR	R	42	41	-1						1.12722	0.172769	0.292986		1	10	Q71SY5	MED25_HUMAN	Mediator of RNA polymerase II transcription subunit 25		AcD3C13|R(1), Ace|R(1), Ace|R<C13N15>(1)	63	529.75	2
	M	T	A	NatA	2	Ace(2)	Ace	TAAPA	TAAPASPQQIR	R<C13N15>	≥96	100	N.D.						1.29568	0.373709	0.787194		2	12	O95402	MED26_HUMAN	Mediator of RNA polymerase II transcription subunit 26		Ace|R(1), Ace|R<C13N15>(1)	38	596.322	2
	M	S	T	NatA	4	Ace(4)	Ace	STPPL	STPPLAASGMAPGPFAGPQAQQAAR	R<C13N15>	100	100	0						0.889305	-0.16925	-0.548202		2	26	Q96HR3	MED30_HUMAN	Mediator of RNA polymerase II transcription subunit 30		Ace|R<C13N15>(2), Ace|R(2)	77	816.405	3
	M	A	A	NatA	6	Ace(6)	Ace	AAAVA	AAAVAMETDDAGNR	R<C13N15>	100	100	0						0.978063	-0.0320002	-0.21064		2	15	Q9Y3C7	MED31_HUMAN	Mediator of RNA polymerase II transcription subunit 31		Ace|R(3), Ace|R<C13N15>(3)	111	730.322	2
	M	A	A	NatA	4	Ace(4)	Ace	AASSS	AASSSGEKEKER	R	100	100	0						0.895635	-0.159017	-0.523036		2	13	Q9NPJ6	MED4_HUMAN	Mediator of RNA polymerase II transcription subunit 4		Ace|R(2), Ace|R<C13N15>(2)	75	707.86	2
	M	A	S	NatA	2	Ace(2)	Ace	ASAGV	ASAGVAAGR	R	97	100	3						0.78839	-0.343019	-0.975583		2	10	Q9NWA0	MED9_HUMAN	Mediator of RNA polymerase II transcription subunit 9		Ace|R(1), Ace|R<C13N15>(1)	67	401.214	2
	M	S	K	NatA	1	Ace(1)	Ace	SKKKG	SKKKGLSAEEKR	R	100	100	0						0.81449	-0.296031	-0.860018		2	13	Q9BWT6	MND1_HUMAN	Meiotic nuclear division protein 1 homolog		Ace|R(1)	83	795.977	2
	M	S	D	NatA	1	Ace(1)	Ace	SDTSE	SDTSESGAGLTR	R	100	100	0						1.36565	0.449588	0.973815		2	13	Q9UNF1	MAGD2_HUMAN	Melanoma-associated antigen D2		Ace|R(1)	80	611.781	2
	-	M	L	NatC or other	1	Ace(1)	Ace	MLQKP	MLQKPR	R	100	100	0						1.28918	0.366454	0.769349		1	6	Q96MG7	MAGG1_HUMAN	Melanoma-associated antigen G1		Ace|R(1)	36	439.25	2
	-	M	I	NatC or other	3	AcD3C13(3)	AcD3C13	MIIKE	MIIKEYR	R<C13N15>	100	100	0						1.27593	0.351549	0.732692		1	7	Q9BZ72	PITM2_HUMAN	Membrane-associated phosphatidylinositol transfer protein 2		AcD3C13|R(2), AcD3C13|R<C13N15>(1)	59	536.805	2
	M	G	L	NatA	1	AcD3C13(1)	AcD3C13	GLKAA	GLKAAQKTLFPLR	R	0	≤6	N.D.						1.4133	0.499068	1.09551		2	14	O00255	MEN1_HUMAN	Menin		AcD3C13|R(1)	38	792.5	2
	M	A	A	NatA	2	Ace(2)	Ace	AANMY	AANMYR	R	100	100	0						1.28698	0.36399	0.763289		2	7	O94776	MTA2_HUMAN	Metastasis-associated protein MTA2	Q13330 (2-7), Q9BTC8 (2-7)	Ace|R<C13N15>(1), Ace|R(1)	47	392.176	2
	M	S	F	NatA	10	Ace(10)	Ace	SFLKS	SFLKSFPPPGPAEGLLR	R	100	100	0						0.5808	-0.783887	-2.05989		2	18	P54105	ICLN_HUMAN	Methylosome subunit pICln		Ace|R<C13N15>(7), Ace|R(3)	99	951.529	2
	-	M	T	other	1	Ace(1)	Ace	MTLEA	MTLEAIR	R<C13N15>	100	100	0						1.15323	0.20568	0.37393		1	7	Q9BV20	MTNA_HUMAN	Methylthioribose-1-phosphate isomerase		Ace|R<C13N15>(1)	40	451.238	2
	M	T	L	NatA	3	AcD3C13(1), Ace(2)	AcD3C13	TLEAI	TLEAIR	R	N.D.	N.D.	N.D.						N.D.				2	7	Q9BV20	MTNA_HUMAN	Methylthioribose-1-phosphate isomerase	Q8TE73 (977-982)	AcD3C13|R(1), Ace|R<C13N15>(1), Ace|R(1)	49	375.229	2
	M	S	S	NatA	2	Ace(2)	Ace	SSGAD	SSGADGGGGAAVAAR	R	100	100	0						0.93143	-0.102481	-0.383985		2	16	Q5JPI9	MET10_HUMAN	Methyltransferase-like protein 10		Ace|R<C13N15>(1), Ace|R(1)	101	623.294	2
	-	M	N	NatB or other	1	Ace(1)	Ace	MNLLP	MNLLPKSSR	R<C13N15>	100	100	0						0.95984	-0.0591342	-0.277375		1	9	Q8N6R0	MET13_HUMAN	Methyltransferase-like protein 13		Ace|R<C13N15>(1)	42	580.82	2
	M	A	G	NatA	2	Ace(2)	Ace	AGSYP	AGSYPEGAPAVLADKR	R	100	100	0						0.85922	-0.218901	-0.670317		2	17	Q96IZ6	MET2A_HUMAN	Methyltransferase-like protein 2A		Ace|R(1), Ace|R<C13N15>(1)	93	845.941	2
	M	A	G	NatA	2	Ace(2)	Ace	AGSYP	AGSYPEGAPAILADKR	R	100	100	0						0.91318	-0.131029	-0.454199		2	17	Q6P1Q9	MET2B_HUMAN	Methyltransferase-like protein 2B		Ace|R<C13N15>(1), Ace|R(1)	89	852.949	2
	-	M	E	NatB	3	Ace(3)	Ace	MEALG	MEALGDLEGPR	R<C13N15>	100	100	0						1.36172	0.445434	0.963598		1	11	Q6NT16	S18B1_HUMAN	MFS-type transporter SLC18B1		Ace|R(2), Ace|R<C13N15>(1)	65	628.297	2
	M	S	V	NatA	4	Ace(4)	Ace	SVPSA	SVPSALMKQPPIQSTAGAVPVR	R<C13N15>	100	100	0						1.01906	0.027239	-0.0649424		2	23	P55081	MFAP1_HUMAN	Microfibrillar-associated protein 1		Ace|R(2), Ace|R<C13N15>(2)	83	1175.15	2
	-	M	E	NatB	1	Ace(1)	Ace	METDE	METDESPSPLPCGPAGEAVMESR	R	100	100	0						N.D.				1	23	Q8WYQ5	DGCR8_HUMAN	Microprocessor complex subunit DGCR8		Ace|R(1)	25	841.023	3
	M	A	D	NatA	6	Ace(6)	Ace	ADLSL	ADLSLADALTEPSPDIEGEIKR	R<C13N15>	100	100	0						1.00076	0.00110324	-0.129223		2	23	P27816	MAP4_HUMAN	Microtubule-associated protein 4		Ace|R(4), Ace|R<C13N15>(2)	63	1220.13	2
	M	A	V	NatA	7	Ace(7)	Ace	AVNVY	AVNVYSTSVTSDNLSR	R	100	100	0						0.739029	-0.436298	-1.205		2	17	Q15691	MARE1_HUMAN	Microtubule-associated protein RP/EB family member 1		Ace|R(4), Ace|R<C13N15>(3)	113	877.932	2
	M	A	V	NatA	1	Ace(1)	Ace	AVNVY	AVNVYSTSVTSENLSR	R<C13N15>	100	100	0						N.D.				2	17	Q9UPY8	MARE3_HUMAN	Microtubule-associated protein RP/EB family member 3		Ace|R<C13N15>(1)	67	889.943	2
	M	P	S	none	2	AcD3C13(2)	AcD3C13	PSEKT	PSEKTFKQR	R<C13N15>	0	0	0						0.43409	-1.20393	-3.09299	99% siCTR	2	10	A6NCE7	MP3B2_HUMAN	Microtubule-associated proteins 1A/1B light chain 3 beta 2	Q9GZQ8 (2-10)	AcD3C13|R<C13N15>(1), AcD3C13|R(1)	60	636.367	2
	-	M	E	NatB	2	Ace(2)	Ace	MEPQP	MEPQPGGAR	R	100	100	0						1.31934	0.399816	0.851404		1	9	Q504T8	MIDN_HUMAN	Midnolin		Ace|R(1), Ace|R<C13N15>(1)	37	500.73	2
	M	S	G	NatA	2	Ace(2)	Ace	SGEPG	SGEPGQTSVAPPPEEVEPGSGVR	R	100	100	0						1.21547	0.281514	0.560442		2	24	Q9BRT3	MIEN1_HUMAN	Migration and invasion enhancer 1		Ace|R(1), Ace|R<C13N15>(1)	60	1153.05	2
	M	A	K	NatA	1	Ace(1)	Ace	AKSGL	AKSGLR	R<C13N15>	N.D.	N.D.	N.D.						N.D.				2	7	Q8WV92	MITD1_HUMAN	MIT domain-containing protein 1	Q8WW38 (433-438)	Ace|R<C13N15>(1)	33	365.725	2
	M	P	F	none	2	AcD3C13(2)	AcD3C13	PFAED	PFAEDKTYKYICR	R	0	0	0						1.60307	0.680837	1.54257		2	14	Q7Z434	MAVS_HUMAN	Mitochondrial antiviral-signaling protein		AcD3C13|R(2)	57	916.471	2
	M	S	K	NatA	1	Ace(1)	Ace	SKGTS	SKGTSSDTSLGR	R	N.D.	N.D.	N.D.						7.15356	2.83866	6.84969	99% siNatA	2	13	Q9GZY8	MFF_HUMAN	Mitochondrial fission factor		Ace|R(1)	37	642.823	2
	M	A	E	NatA	3	Ace(2), AcD3C13(1)	Ace	AELGE	AELGEADEAELQR	R<C13N15>	86	100	14	√				√	0.980414	-0.028537	-0.202122		2	14	Q9Y5J9	TIM8B_HUMAN	Mitochondrial import inner membrane translocase subunit Tim8 B		Ace|R<C13N15>(1), Ace|R(1), AcD3C13|R(1)	68	741.851	2
	M	A	P	none	1	AcD3C13(1)	AcD3C13	APKFP	APKFPDSVEELR	R<C13N15>	0	0	0						1.11925	0.162532	0.267809		2	13	Q15785	TOM34_HUMAN	Mitochondrial import receptor subunit TOM34		AcD3C13|R<C13N15>(1)	39	746.405	2
	-	M	V	other	1	AcD3C13(1)	AcD3C13	MVKLS	MVKLSKEAKQR	R	0	0	0						0.99724	-0.00398734	-0.141743		1	11	Q9P0U1	TOM7_HUMAN	Mitochondrial import receptor subunit TOM7 homolog		AcD3C13|R(1)	33	761.457	2
	M	V	K	NatA	1	AcD3C13(1)	AcD3C13	VKLSK	VKLSKEAKQR	R	0	N.D.	N.D.						N.D.				2	11	Q9P0U1	TOM7_HUMAN	Mitochondrial import receptor subunit TOM7 homolog		AcD3C13|R(1)	48	687.939	2
	-	M	K	other	2	AcD3C13(2)	AcD3C13	MKKDV	MKKDVR	R	0	0	0						1.31526	0.395348	0.840414		1	6	Q8IXI2	MIRO1_HUMAN	Mitochondrial Rho GTPase 1		AcD3C13|R(1), AcD3C13|R<C13N15>(1)	41	467.277	2
	M	A	A	NatA	21	Ace(21)	Ace	AAAAA	AAAAAAGAGPEMVR	R	100	100	0						0.917996	-0.123441	-0.435536		2	15	P28482	MK01_HUMAN	Mitogen-activated protein kinase 1		Ace|R<C13N15>(9), Ace|R(12)	85	650.819	2
	M	A	A	NatA	3	Ace(3)	Ace	AAAAA	AAAAAQGGGGGEPR	R<C13N15>	100	100	0						0.9455	-0.0808506	-0.330787		2	15	P27361	MK03_HUMAN	Mitogen-activated protein kinase 3		Ace|R(2), Ace|R<C13N15>(1)	101	611.296	2
	-	M	N	NatB or other	2	Ace(2)	Ace	MNPGF	MNPGFDLSR	R<C13N15>	100	100	0						1.20561	0.269763	0.531541		1	9	Q8IVH8	M4K3_HUMAN	Mitogen-activated protein kinase kinase kinase kinase 3		Ace|R(1), Ace|R<C13N15>(1)	73	552.755	2
	M	A	N	NatA	1	Ace(1)	Ace	ANDSP	ANDSPAKSLVDIDLSSLR	R	93	100	7	√					0.951149	-0.0722561	-0.309648		2	19	O95819	M4K4_HUMAN	Mitogen-activated protein kinase kinase kinase kinase 4		Ace|R(1)	74	995.526	2
	M	A	V	NatA	2	Ace(2)	Ace	AVEGS	AVEGSTITSR	R<C13N15>	100	100	0						0.99508	-0.00711558	-0.149437		2	11	O60336	MABP1_HUMAN	Mitogen-activated protein kinase-binding protein 1		Ace|R(1), Ace|R<C13N15>(1)	44	536.779	2
	-	M	E	NatB	4	Ace(4)	Ace	MEDLG	MEDLGENTMVLSTLR	R	100	100	0						1.15654	0.209815	0.3841		1	15	Q9Y6D9	MD1L1_HUMAN	Mitotic spindle assembly checkpoint protein MAD1		Ace|R<C13N15>(2), Ace|R(2)	107	891.916	2
	-	M	V	other	2	Ace(2)	Ace	MVGGG	MVGGGGVGGGLLENANPLIYQR	R	81	82	1						0.72684	-0.46029	-1.26401		1	22	Q9Y3D0	MIP18_HUMAN	Mitotic spindle-associated MMXD complex subunit MIP18		Ace|R<C13N15>(1), Ace|R(1)	117	1115.57	2
	M	V	G	NatA	4	AcD3C13(4)	AcD3C13	VGGGG	VGGGGVGGGLLENANPLIYQR	R	0	0	0						1.05786	0.0811487	0.0676474		2	22	Q9Y3D0	MIP18_HUMAN	Mitotic spindle-associated MMXD complex subunit MIP18		AcD3C13|R(2), AcD3C13|R<C13N15>(2)	120	1044.56	2
	M	A	A	NatA	4	Ace(4)	Ace	AAQGV	AAQGVGPGPGSAAPPGLEAAR	R	100	99.8549	-0.145107						0.932045	-0.101528	-0.381643		2	22	Q6NZ67	MZT2B_HUMAN	Mitotic-spindle organizing protein 2B	Q6P582 (2-22)	Ace|R<C13N15>(2), Ace|R(2)	110	936.982	2
	M	A	A	NatA	1	Ace(1)	Ace	AADVF	AADVFMCSPR	R	N.D.	N.D.	N.D.						0.423497	-1.23958	-3.18065	99% siCTR	2	11	Q9HAP2	MLXIP_HUMAN	MLX-interacting protein		Ace|R(1)	34	606.263	2
	M	S	F	NatA	2	Ace(2)	Ace	SFLFS	SFLFSSR	R<C13N15>	100	100	0						0.8928	-0.163591	-0.534285		2	8	Q9H8S9	MOB1A_HUMAN	MOB kinase activator 1A		Ace|R<C13N15>(1), Ace|R(1)	51	448.231	2
	M	V	M	NatA	10	AcD3C13(7), Ace(3)	AcD3C13	VMAEG	VMAEGTAVLR	R<C13N15>	13	15	2						1.09587	0.132079	0.192908		2	11	Q9Y3A3	PHOCN_HUMAN	MOB-like protein phocein		AcD3C13|R(4), AcD3C13|R<C13N15>(3), Ace|R<C13N15>(1), Ace|R(2)	82	560.307	2
	-	M	E	NatB	2	Ace(2)	Ace	METLQ	METLQSETKTR	R	100	100	0						1.77102	0.824581	1.8961		1	11	Q9BWK5	MRI_HUMAN	Modulator of retrovirus infection homolog		Ace|R(1), Ace|R<C13N15>(1)	86	714.853	2
	M	P	K	none	14	AcD3C13(14)	AcD3C13	PKTIS	PKTISVR	R<C13N15>	0	0	0						1.1319	0.178747	0.307687		2	8	P26038	MOES_HUMAN	Moesin		AcD3C13|R(8), AcD3C13|R<C13N15>(6)	56	452.793	2
	M	A	F	NatA	1	Ace(1)	Ace	AFTNY	AFTNYSSLNR	R	93	100	7	√					0.930603	-0.103762	-0.387135		2	11	Q9Y6X9	MORC2_HUMAN	MORC family CW-type zinc finger protein 2		Ace|R(1)	66	607.794	2
	M	S	S	NatA	1	Ace(1)	Ace	SSILP	SSILPFTPPIVKR	R	100	100	0						1.43564	0.521694	1.15116		2	14	P84022	SMAD3_HUMAN	Mothers against decapentaplegic homolog 3		Ace|R(1)	51	772.464	2
	M	S	T	NatA	2	Ace(2)	Ace	STELF	STELFSSTR	R	100	100	0						1.13405	0.181484	0.314421		2	10	P30307	MPIP3_HUMAN	M-phase inducer phosphatase 3		Ace|R<C13N15>(1), Ace|R(1)	57	535.262	2
	-	M	E	NatB	4	Ace(4)	Ace	MEQVA	MEQVAEGAR	R	100	100	0						1.74005	0.799129	1.8335		1	9	Q99549	MPP8_HUMAN	M-phase phosphoprotein 8		Ace|R(2), Ace|R<C13N15>(2)	77	524.74	2
	M	A	A	NatA	1	Ace(1)	Ace	AAVAA	AAVAAGGLVGKGR	R<C13N15>	100	100	0						N.D.				2	14	Q8IZD4	DCP1B_HUMAN	mRNA-decapping enzyme 1B		Ace|R<C13N15>(1)	33	613.365	2
	M	A	L	NatA	1	Ace(1)	Ace	ALVTV	ALVTVSR	R<C13N15>	100	100	0						0.71586	-0.482251	-1.31802		2	8	Q8TE77	SSH3_HUMAN	Mucin-20	Q8N307 (521-527)	Ace|R<C13N15>(1)	48	399.242	2
	M	S	L	NatA	1	Ace(1)	Ace	SLLGD	SLLGDPLQALPPSAAPTGPLLAPPAGATLNR	R	100	100	0						0.8029	-0.316708	-0.910872		2	32	Q9UDY8	MALT1_HUMAN	Mucosa-associated lymphoid tissue lymphoma translocation protein 1		Ace|R(1)	62	1006.89	3
	-	M	L	NatC or other	3	AcD3C13(3)	AcD3C13	MLEAI	MLEAIDKNR	R	8	7	-1						0.90653	-0.141573	-0.480133		1	9	O75970	MPDZ_HUMAN	Multiple PDZ domain protein		AcD3C13|R(2), AcD3C13|R<C13N15>(1)	57	600.324	2
	M	A	V	NatA	1	Ace(1)	Ace	AVSVT	AVSVTPIR	R	N.D.	N.D.	N.D.						N.D.				2	9	Q9NR56	MBNL1_HUMAN	Muscleblind-like protein 1		Ace|R(1)	47	442.764	2
	M	A	L	NatA	4	Ace(4)	Ace	ALNVA	ALNVAPVR	R	100	100	0						1.21211	0.277518	0.550613		2	9	Q5VZF2	MBNL2_HUMAN	Muscleblind-like protein 2		Ace|R(2), Ace|R<C13N15>(2)	41	441.264	2
	M	A	A	NatA	3	Ace(2), AcD3C13(1)	Ace	AAGGA	AAGGAVAAAPECR	R	71	100	29	√			√		0.776596	-0.364764	-1.02907		2	14	Q9UL63	MKLN1_HUMAN	Muskelin		Ace|R<C13N15>(1), AcD3C13|R(1), Ace|R(1)	57	621.798	2
	M	A	E	NatA	2	Ace(2)	Ace	AEMGS	AEMGSKGVTAGKIASNVQKKLTR	R	100	100	0						1.05135	0.072243	0.0457441		2	24	O00499	BIN1_HUMAN	Myc box-dependent-interacting protein 1		Ace|R(2)	128	1310.74	2
	M	P	L	none	1	AcD3C13(1)	AcD3C13	PLNVS	PLNVSFTNR	R	0	0	0						1.02526	0.0359943	-0.043409		2	10	P01106	MYC_HUMAN	Myc proto-oncogene protein		AcD3C13|R(1)	60	547.801	2
	M	A	A	NatA	1	Ace(1)	Ace	AAGGP	AAGGPGAGSAAPVSSTSSLPLAALNMR	R<C13N15>	100	100	0						1.09361	0.129098	0.185578		2	28	Q99836	MYD88_HUMAN	Myeloid differentiation primary response protein MyD88		Ace|R<C13N15>(1)	44	827.088	3
	M	S	A	NatA	2	Ace(2)	Ace	SAAKE	SAAKENPCR	R	99.9417	99.9077	-0.0339496						1.9564	0.968201	2.24933		2	10	Q6WCQ1	MPRIP_HUMAN	Myosin phosphatase Rho-interacting protein		Ace|R(1), Ace|R<C13N15>(1)	51	561.271	2
	M	S	S	NatA	5	Ace(5)	Ace	SSKKA	SSKKAKTKTTKKR	R<C13N15>	93.0886	100	6.91145	√					1.08685	0.120159	0.163592		2	14	O14950	ML12B_HUMAN	Myosin regulatory light chain 12B		Ace|R(4), Ace|R<C13N15>(1)	51	913.588	2
	M	A	A	NatA	5	Ace(5)	Ace	AAVTM	AAVTMSVPGR	R	100	100	0						1.77633	0.828903	1.90673		2	11	Q7Z406	MYH14_HUMAN	Myosin-14		Ace|R(3), Ace|R<C13N15>(2)	61	523.769	2
	-	M	E	NatB	2	Ace(2)	Ace	MEFAE	MEFAELIKTPR	R<C13N15>	100	100	0						1.1541	0.206768	0.376606		1	11	Q96QG7	MTMR9_HUMAN	Myotubularin-related protein 9		Ace|R(1), Ace|R<C13N15>(1)	64	725.386	2
	M	S	A	NatA	4	Ace(4)	Ace	SADAA	SADAAAGAPLPR	R	100	100	0						1.30926	0.388752	0.82419		2	13	O14745	NHRF1_HUMAN	Na(+)/H(+) exchange regulatory cofactor NHE-RF1		Ace|R(3), Ace|R<C13N15>(1)	85	569.797	2
	M	A	A	NatA	7	Ace(7)	Ace	AAIYG	AAIYGGVEGGGTR	R<C13N15>	100	100	0						1.00572	0.00822297	-0.111712		2	14	Q9UJ70	NAGK_HUMAN	N-acetyl-D-glucosamine kinase		Ace|R<C13N15>(4), Ace|R(3)	105	630.317	2
	-	M	D	NatB	7	Ace(7)	Ace	MDSVE	MDSVEKGAATSVSNPR	R	100	100	0						1.74896	0.806497	1.85163		1	16	Q8NFW8	NEUA_HUMAN	N-acylneuraminate cytidylyltransferase		Ace|R(4), Ace|R<C13N15>(3)	72	877.423	2
	M	A	D	NatA	2	Ace(2)	Ace	ADEAA	ADEAALALQPGGSPSAAGADR	R	≥83	100	N.D.						N.D.				2	22	Q96EB6	SIR1_HUMAN	NAD-dependent protein deacetylase sirtuin-1		Ace|R(1), Ace|R<C13N15>(1)	107	983.977	2
	-	M	E	NatB	5	Ace(5)	Ace	MELVQ	MELVQVLKR	R	100	100	0						1.05684	0.079757	0.0642245		1	9	Q9UI09	NDUAC_HUMAN	NADH dehydrogenase [ubiquinone] 1 alpha subcomplex subunit 12		Ace|R(2), Ace|R<C13N15>(3)	78	610.855	2
	M	P	F	none	4	AcD3C13(4)	AcD3C13	PFLDI	PFLDIQKR	R	0	0	0						1.11035	0.151015	0.239481		2	9	O43920	NDUS5_HUMAN	NADH dehydrogenase [ubiquinone] iron-sulfur protein 5		AcD3C13|R(2), AcD3C13|R<C13N15>(2)	66	555.834	2
	-	M	E	NatB	2	Ace(2)	Ace	MEPEA	MEPEAPR	R<C13N15>	N.D.	100	N.D.						Singleton heavy			99% siCTR	1	7	P48163	MAOX_HUMAN	NADP-dependent malic enzyme		Ace|R<C13N15>(2)	38	449.204	2
	M	P	S	none	1	AcD3C13(1)	AcD3C13	PSPQL	PSPQLLVLFGSQTGTAQDVSER	R	0	0	0						1.00167	0.00240729	-0.126015		2	23	Q9UHB4	NDOR1_HUMAN	NADPH-dependent diflavin oxidoreductase 1		AcD3C13|R(1)	48	793.084	3
	M	P	A	none	10	AcD3C13(10)	AcD3C13	PAVSL	PAVSLPPKENALFKR	R<C13N15>	0	0	0						0.1399	-2.83753	-7.11079	99% siCTR	2	16	Q9BXJ9	NAA15_HUMAN	N-alpha-acetyltransferase 15, NatA auxiliary subunit		AcD3C13|R<C13N15>(6), AcD3C13|R(4)	65	606.698	3
	M	A	E	NatA	1	Ace(1)	Ace	AEVPP	AEVPPGPSSLLPPPAPPAPAAVEPR	R<C13N15>	100	100	0						1.0678	0.0946415	0.100833		2	26	Q147X3	NAA30_HUMAN	N-alpha-acetyltransferase 30		Ace|R<C13N15>(1)	43	822.781	3
	-	M	T	other	4	Ace(2), AcD3C13(2)	AcD3C13	MTSAL	MTSALENYINR	R<C13N15>	41	36	-5						0.38408	-1.38052	-3.5273	99% siCTR	1	11	O95777	NAA38_HUMAN	N-alpha-acetyltransferase 38, NatC auxiliary subunit		Ace|R<C13N15>(2), AcD3C13|R<C13N15>(1), AcD3C13|R(1)	53	692.841	2
	M	T	S	NatA	4	Ace(3), AcD3C13(1)	Ace	TSALE	TSALENYINR	R	81	100	19	√			√		1.02991	0.0425134	-0.0273753		2	11	O95777	NAA38_HUMAN	N-alpha-acetyltransferase 38, NatC auxiliary subunit		Ace|R<C13N15>(2), Ace|R(1), AcD3C13|R(1)	61	611.807	2
	M	S	Y	NatA	1	Ace(1)	Ace	SYGEI	SYGEIEGKFLGPR	R<C13N15>	92	100	8	√					0.946552	-0.0792468	-0.326842		2	14	Q92802	N42L2_HUMAN	NEDD4-binding protein 2-like 2		Ace|R<C13N15>(1)	39	776.406	2
	M	A	D	NatA	2	Ace(2)	Ace	ADGEE	ADGEEPEKKR	R<C13N15>	100	100	0						1.10672	0.14629	0.227862		2	11	Q8TBC4	UBA3_HUMAN	NEDD8-activating enzyme E1 catalytic subunit		Ace|R(1), Ace|R<C13N15>(1)	49	652.839	2
	M	A	Q	NatA	2	Ace(2)	Ace	AQLGK	AQLGKLLKEQKYDR	R	100	100	0						1.15583	0.208923	0.381906		2	15	Q13564	ULA1_HUMAN	NEDD8-activating enzyme E1 regulatory subunit		Ace|R(1), Ace|R<C13N15>(1)	111	937.045	2
	-	M	L	NatC or other	1	Ace(1)	Ace	MLTLA	MLTLASKLKR	R	100	100	0						0.77287	-0.371702	-1.04613		1	10	Q969M7	UBE2F_HUMAN	NEDD8-conjugating enzyme UBE2F		Ace|R(1)	54	656.902	2
	-	M	M	other	1	Ace(1)	Ace	MMKTE	MMKTEPR	R	100	100	0						0.99239	-0.0110209	-0.159042		1	7	Q96SB3	NEB2_HUMAN	Neurabin-2		Ace|R(1)	36	507.241	2
	M	S	S	NatA	4	Ace(4)	Ace	SSVQQ	SSVQQQPPPPR	R	100	100	0						0.88949	-0.16895	-0.547464		2	12	O00401	WASL_HUMAN	Neural Wiskott-Aldrich syndrome protein		Ace|R<C13N15>(2), Ace|R(2)	74	631.828	2
	-	M	E	NatB	11	Ace(11)	Ace	MEKEE	MEKEETTR	R	100	100	0						1.32038	0.400955	0.854205		1	8	Q09666	AHNK_HUMAN	Neuroblast differentiation-associated protein AHNAK		Ace|R(6), Ace|R<C13N15>(5)	58	564.764	2
	-	M	E	NatB	3	Ace(3)	Ace	MEPEL	MEPELAAQKQPR	R	N.D.	N.D.	N.D.						N.D.				1	12	Q7Z628	ARHG8_HUMAN	Neuroepithelial cell-transforming gene 1 protein		Ace|R(2), Ace|R<C13N15>(1)	73	751.885	2
	-	M	V	other	4	Ace(4)	Ace	MVADP	MVADPPR	R<C13N15>	100	100	0						0.62564	-0.676595	-1.79601		1	7	Q15758	AAAT_HUMAN	Neutral amino acid transporter B(0)		Ace|R(2), Ace|R<C13N15>(2)	47	427.209	2
	-	M	F	NatC or other	8	Ace(6), AcD3C13(2)	Ace	MFAKA	MFAKATR	R<C13N15>	N.D.	N.D.	N.D.						0.523985	-0.932402	-2.42516		1	7	O60443	DFNA5_HUMAN	Non-syndromic hearing impairment protein 5		Ace|R<C13N15>(3), Ace|R(3), AcD3C13|R<C13N15>(2)	59	470.251	2
	M	A	S	NatA	2	Ace(2)	Ace	ASVDF	ASVDFKTYVDQACR	R	100	100	0						1.05708	0.0800846	0.0650302		2	15	Q9UKK6	NXT1_HUMAN	NTF2-related export protein 1		Ace|R(1), Ace|R<C13N15>(1)	70	874.917	2
	M	A	T	NatA	2	Ace(2)	Ace	ATSLD	ATSLDFKTYVDQACR	R<C13N15>	N.D.	100	N.D.						N.D.				2	16	Q9NPJ8	NXT2_HUMAN	NTF2-related export protein 2		Ace|R(1), Ace|R<C13N15>(1)	50	937.452	2
	M	A	G	NatA	6	Ace(4), AcD3C13(2)	Ace	AGGGG	AGGGGDLSTR	R	92	100	8	√					1.37552	0.459976	0.999364		2	11	P23497	SP100_HUMAN	Nuclear autoantigen Sp-100		Ace|R(2), Ace|R<C13N15>(2), AcD3C13|R(2)	97	466.725	2
	R	M	F	NatC or other	2	Ace(2)	Ace	MFTED	MFTEDQGVDDR	R	N.D.	N.D.	N.D.						N.D.				37	47	P23497	SP100_HUMAN	Nuclear autoantigen Sp-100		Ace|R(1), Ace|R<C13N15>(1)	44	685.78	2
	M	A	G	NatA	1	Ace(1)	Ace	AGGGS	AGGGSDLSTR	R<C13N15>	81	100	19	√					0.846541	-0.240348	-0.723068		2	11	Q9H930	SP14L_HUMAN	Nuclear body protein SP140-like protein		Ace|R<C13N15>(1)	47	486.734	2
	M	S	G	NatA	3	Ace(3)	Ace	SGGLL	SGGLLKALR	R	100	100	0						0.7279	-0.458188	-1.25884		2	10	P52298	NCBP2_HUMAN	Nuclear cap-binding protein subunit 2		Ace|R<C13N15>(2), Ace|R(1)	75	502.316	2
	-	M	F	NatC or other	3	Ace(3)	Ace	MFPAA	MFPAAPSPR	R	100	100	0						1.00172	0.0024841	-0.125827		1	9	Q8WUM0	NU133_HUMAN	Nuclear pore complex protein Nup133		Ace|R<C13N15>(1), Ace|R(2)	65	516.253	2
	M	A	S	NatA	6	Ace(5), AcD3C13(1)	Ace	ASGAG	ASGAGGVGGGGGGKIR	R	71	100	29	√					0.702593	-0.50924	-1.3844		2	17	P49790	NU153_HUMAN	Nuclear pore complex protein Nup153		Ace|R<C13N15>(3), Ace|R(2), AcD3C13|R(1)	100	673.86	2
	M	P	S	none	1	AcD3C13(1)	AcD3C13	PSSLL	PSSLLGAAMPASTSAAALQEALENAGR	R<C13N15>	0	0	0						0.84922	-0.23579	-0.711856		2	28	O75694	NU155_HUMAN	Nuclear pore complex protein Nup155		AcD3C13|R<C13N15>(1)	43	886.453	3
	M	G	D	NatA	3	Ace(3)	Ace	GDEMD	GDEMDAMIPER	R	100	100	0						0.95181	-0.0712545	-0.307185		2	12	P35658	NU214_HUMAN	Nuclear pore complex protein Nup214		Ace|R<C13N15>(2), Ace|R(1)	44	669.271	2
	M	A	E	NatA	2	Ace(2)	Ace	AESII	AESIIIR	R<C13N15>	92	100	8	√					1.06207	0.0868775	0.0817371		2	8	Q8TAT6	NPL4_HUMAN	Nuclear protein localization protein 4 homolog		Ace|R<C13N15>(1), Ace|R(1)	70	427.254	2
	M	S	G	NatA	2	Ace(2)	Ace	SGLGE	SGLGENLDPLASDSR	R	N.D.	100	N.D.						N.D.				2	16	Q9Y6Q9	NCOA3_HUMAN	Nuclear receptor coactivator 3		Ace|R(1), Ace|R<C13N15>(1)	116	786.879	2
	-	M	D	NatB	2	Ace(2)	Ace	MDTKE	MDTKEEKKER	R	100	100	0						0.65055	-0.620268	-1.65747		1	10	Q8NI08	NCOA7_HUMAN	Nuclear receptor coactivator 7		Ace|R(1), Ace|R<C13N15>(1)	55	746.884	2
	R	M	E	NatB	2	Ace(2)	Ace	MEKKI	MEKKIQR	R<C13N15>	100	100	0						0.3843	-1.3797	-3.52527	99% siCTR	122	128	Q9H0G5	NSRP1_HUMAN	Nuclear speckle splicing regulatory protein 1		Ace|R<C13N15>(1), Ace|R(1)	40	547.814	2
	-	M	V	other	1	Ace(1)	Ace	MVKPK	MVKPKYKGR	R	100	100	0						0.81815	-0.289563	-0.84411		1	9	Q13823	NOG2_HUMAN	Nucleolar GTP-binding protein 2		Ace|R(1)	34	653.386	2
	M	V	K	NatA	2	AcD3C13(2)	AcD3C13	VKPKY	VKPKYKGR	R<C13N15>	0	0	0						0.62167	-0.685779	-1.8186		2	9	Q13823	NOG2_HUMAN	Nucleolar GTP-binding protein 2		AcD3C13|R<C13N15>(1), AcD3C13|R(1)	46	587.385	2
	M	A	K	NatA	3	AcD3C13(3)	AcD3C13	AKAKK	AKAKKVGAR	R	0	0	0						0.902237	-0.148422	-0.496977		2	10	P78316	NOP14_HUMAN	Nucleolar protein 14		AcD3C13|R(2), AcD3C13|R<C13N15>(1)	68	558.879	2
	M	P	K	none	1	AcD3C13(1)	AcD3C13	PKAKG	PKAKGKTR	R	0	0	0						0.72925	-0.455515	-1.25226		2	9	Q9Y3C1	NOP16_HUMAN	Nucleolar protein 16		AcD3C13|R(1)	47	537.357	2
	-	M	G	other	6	Ace(4), AcD3C13(2)	Ace	MGPAP	MGPAPAGEQLR	R	82	81	-1						0.858195	-0.220623	-0.674553		1	11	Q9H6R4	NOL6_HUMAN	Nucleolar protein 6		Ace|R<C13N15>(2), Ace|R(2), AcD3C13|R(1), AcD3C13|R<C13N15>(1)	80	592.79	2
	M	G	P	none	2	AcD3C13(2)	AcD3C13	GPAPA	GPAPAGEQLR	R<C13N15>	0	0	0						0.73162	-0.450834	-1.24075		2	11	Q9H6R4	NOL6_HUMAN	Nucleolar protein 6		AcD3C13|R<C13N15>(1), AcD3C13|R(1)	48	526.789	2
	-	M	N	NatB or other	1	Ace(1)	Ace	MNGEA	MNGEADCPTDLEMAAPKGQDR	R	100	100	0						0.77011	-0.376864	-1.05882		1	21	P17480	UBF1_HUMAN	Nucleolar transcription factor 1		Ace|R(1)	59	809.679	3
	-	M	E	NatB	4	Ace(4)	Ace	MEDEM	MEDEMPKTLYVGNLSR	R	100	100	0						0.78465	-0.349879	-0.992456		1	16	P31483	TIA1_HUMAN	Nucleolysin TIA-1 isoform p40		Ace|R<C13N15>(2), Ace|R(2)	95	1002.47	2
	M	A	A	NatA	4	Ace(4)	Ace	AAGTA	AAGTAAALAFLSQESR	R	100	100	0						0.99629	-0.00536235	-0.145125		2	17	O75607	NPM3_HUMAN	Nucleoplasmin-3		Ace|R(3), Ace|R<C13N15>(1)	102	803.416	2
	M	A	A	NatA	2	Ace(2)	Ace	AAAAG	AAAAGGPCVR	R	89	100	11	√					0.889409	-0.16908	-0.547786		2	11	Q5SRE5	NU188_HUMAN	Nucleoporin NUP188 homolog		Ace|R<C13N15>(1), Ace|R(1)	66	486.24	2
	M	A	I	NatA	1	AcD3C13(1)	AcD3C13	AICQF	AICQFFLQGR	R	83.5913	100	16.4087	√					1.91124	0.934511	2.16647		2	11	O15504	NUPL2_HUMAN	Nucleoporin-like protein 2		AcD3C13|R(1)	44	643.837	2
	M	A	A	NatA	11	Ace(9), AcD3C13(2)	Ace	AAVLQ	AAVLQQVLER	R<C13N15>	100	100	0						0.935264	-0.0965544	-0.36941		2	11	P12270	TPR_HUMAN	Nucleoprotein TPR		Ace|R<C13N15>(4), Ace|R(5), AcD3C13|R(2)	89	589.842	2
	-	M	L	NatC or other	1	AcD3C13(1)	AcD3C13	MLPDC	MLPDCLSAEGELR	R	0	0	0						1.00338	0.00486809	-0.119963		1	13	Q8WV74	NUDT8_HUMAN	Nucleoside diphosphate-linked moiety X motif 8, mitochondrial		AcD3C13|R(1)	38	777.368	2
	-	M	E	NatB	8	Ace(8)	Ace	MEVAA	MEVAANCSLR	R	100	100	0						0.789205	-0.341528	-0.971917		1	10	Q96RS6	NUDC1_HUMAN	NudC domain-containing protein 1		Ace|R<C13N15>(5), Ace|R(3)	90	604.774	2
	M	A	S	NatA	4	Ace(4)	Ace	ASSLN	ASSLNEDPEGSR	R<C13N15>	100	100	0						0.692535	-0.530041	-1.43556		2	13	Q9Y530	OARD1_HUMAN	O-acetyl-ADP-ribose deacetylase 1		Ace|R<C13N15>(2), Ace|R(2)	62	657.296	2
	-	M	L	NatC or other	4	Ace(4)	Ace	MLGGS	MLGGSLGSR	R	100	100	0						0.98288	-0.0249128	-0.193209		1	9	Q9Y3B8	ORN_HUMAN	Oligoribonuclease, mitochondrial		Ace|R<C13N15>(2), Ace|R(2)	71	468.234	2
	M	S	K	NatA	4	Ace(4)	Ace	SKPPP	SKPPPKPVKPGQVKVFR	R	100	100	0						0.978355	-0.03157	-0.209582		2	18	Q92882	OSTF1_HUMAN	Osteoclast-stimulating factor 1		Ace|R(3), Ace|R<C13N15>(1)	45	1060.16	2
	-	M	E	NatB	4	Ace(4)	Ace	MEAAV	MEAAVGVPDGGDQGGAGPR	R	100	100	0						0.75278	-0.4097	-1.13958		1	19	Q01804	OTUD4_HUMAN	OTU domain-containing protein 4		Ace|R<C13N15>(2), Ace|R(2)	156	899.905	2
	-	M	E	NatB	4	Ace(4)	Ace	MEAVL	MEAVLTEELDEEEQLLR	R	100	100	0						0.80958	-0.304754	-0.881473		1	17	Q8N6M0	OTU6B_HUMAN	OTU domain-containing protein 6B		Ace|R(2), Ace|R<C13N15>(2)	126	1053	2
	M	T	L	NatA	1	AcD3C13(1)	AcD3C13	TLDMD	TLDMDAVLSDFVR	R	0	N.D.	N.D.						N.D.				2	14	Q6GQQ9	OTU7B_HUMAN	OTU domain-containing protein 7B	Q8TE49 (24-36)	AcD3C13|R(1)	52	772.885	2
	M	A	E	NatA	2	Ace(2)	Ace	AETEA	AETEALSKLR	R<C13N15>	100	100	0						0.98922	-0.0156367	-0.170394		2	11	Q9BUP3	HTAI2_HUMAN	Oxidoreductase HTATIP2		Ace|R<C13N15>(1), Ace|R(1)	55	608.842	2
	-	M	E	NatB	1	Ace(1)	Ace	MEGGL	MEGGLADGEPDR	R	100	100	0						1.83606	0.876613	2.02408		1	12	Q9BZF1	OSBL8_HUMAN	Oxysterol-binding protein-related protein 8		Ace|R(1)	28	652.775	2
	-	M	L	NatC or other	3	Ace(3)	Ace	MLSPE	MLSPEAER	R<C13N15>	78	98	20	√	√				0.873786	-0.194647	-0.610667		1	8	Q9NUG6	PDRG1_HUMAN	p53 and DNA damage-regulated protein 1		Ace|R<C13N15>(2), Ace|R(1)	37	500.735	2
	-	M	Q	NatB or other	2	Ace(2)	Ace	MQKSE	MQKSEGSGGTQLKNR	R	100	100	0						1.35481	0.438085	0.945525		1	15	Q8N7B6	PACRL_HUMAN	PACRG-like protein		Ace|R(2)	82	886.949	2
	M	A	D	NatA	2	Ace(2)	Ace	ADVLS	ADVLSVLR	R	100	100	0						1.0322	0.0457225	-0.0194825		2	9	Q6P1J9	CDC73_HUMAN	Parafibromin		Ace|R(1), Ace|R<C13N15>(1)	82	457.769	2
	-	M	E	NatB	1	Ace(1)	Ace	MEDGG	MEDGGLTAFEEDQR	R	100	100	0						0.97626	-0.0346627	-0.217188		1	14	Q96RG2	PASK_HUMAN	PAS domain-containing serine/threonine-protein kinase		Ace|R(1)	75	828.347	2
	-	M	E	NatB	1	Ace(1)	Ace	MEKLA	MEKLAASTEPQGPR	R	100	100	0						1.43511	0.521161	1.14985		1	14	Q9Y365	PCTL_HUMAN	PCTP-like protein		Ace|R(1)	51	810.407	2
	-	M	V	other	1	Ace(1)	Ace	MVNPT	MVNPTVFFDIAVDGEPLGR	R<C13N15>	82	100	18	√	√	√			0.726471	-0.461024	-1.26581		1	19	P62937	PPIA_HUMAN	Peptidyl-prolyl cis-trans isomerase A		Ace|R<C13N15>(1)	66	1073.03	2
	M	V	N	NatA	12	AcD3C13(10), Ace(2)	AcD3C13	VNPTV	VNPTVFFDIAVDGEPLGR	R<C13N15>	13	33	20	√	√	√	√	√	1.5536	0.635614	1.43134		2	19	P62937	PPIA_HUMAN	Peptidyl-prolyl cis-trans isomerase A		AcD3C13|R(5), AcD3C13|R<C13N15>(5), Ace|R(2)	92	1002.03	2
	M	G	V	NatA	12	AcD3C13(12)	AcD3C13	GVQVE	GVQVETISPGDGR	R<C13N15>	0	0	0						1.2641	0.338114	0.699649		2	14	P62942	FKB1A_HUMAN	Peptidyl-prolyl cis-trans isomerase FKBP1A		AcD3C13|R(5), AcD3C13|R<C13N15>(7)	102	686.359	2
	M	A	A	NatA	3	Ace(3)	Ace	AAAVP	AAAVPQR	R	100	100	0						0.8467	-0.240077	-0.722401		2	8	Q00688	FKBP3_HUMAN	Peptidyl-prolyl cis-trans isomerase FKBP3		Ace|R<C13N15>(2), Ace|R(1)	56	377.714	2
	-	M	T	other	1	Ace(1)	Ace	MTAEE	MTAEEMKATESGAQSAPLPMEGVDISPKQDEGVLKVIKR	R	96	100	4						0.6828	-0.550465	-1.48579		1	39	Q02790	FKBP4_HUMAN	Peptidyl-prolyl cis-trans isomerase FKBP4		Ace|R(1)	34	1113.07	4
	M	G	I	NatA	1	AcD3C13(1)	AcD3C13	GIKVQ	GIKVQR	R<C13N15>	0	0	0						1.15998	0.2141	0.394638		2	7	Q13427	PPIG_HUMAN	Peptidyl-prolyl cis-trans isomerase G		AcD3C13|R<C13N15>(1)	32	402.767	2
	M	A	A	NatA	2	Ace(2)	Ace	AAESG	AAESGSDFQQR	R	95	99.7641	4.76412	√				√	0.328167	-1.6075	-4.08555	99% siCTR	2	12	Q96BP3	PPWD1_HUMAN	Peptidylprolyl isomerase domain and WD repeat-containing protein 1		Ace|R<C13N15>(1), Ace|R(1)	86	619.276	2
	M	S	A	NatA	6	Ace(6)	Ace	SADGA	SADGAEADGSTQVTVEEPVQQPSVVDR	R	100	100	0						1.22311	0.290554	0.582676		2	28	O60664	PLIN3_HUMAN	Perilipin-3		Ace|R(4), Ace|R<C13N15>(2)	100	938.441	3
	-	M	K	other	2	AcD3C13(2)	AcD3C13	MKFAY	MKFAYR	R<C13N15>	0	0	0						1.00775	0.0111378	-0.104543		1	6	Q15269	PWP2_HUMAN	Periodic tryptophan protein 2 homolog		AcD3C13|R<C13N15>(1), AcD3C13|R(1)	40	468.253	2
	-	M	N	NatB or other	2	Ace(2)	Ace	MNSLF	MNSLFR	R<C13N15>	100	100	0						1.35977	0.443363	0.958505		1	6	O60437	PEPL_HUMAN	Periplakin		Ace|R(1), Ace|R<C13N15>(1)	44	418.204	2
	M	P	G	none	11	AcD3C13(11)	AcD3C13	PGGLL	PGGLLLGDVAPNFEANTTVGR	R	0	0	0						0.854069	-0.227576	-0.691654		2	22	P30041	PRDX6_HUMAN	Peroxiredoxin-6		AcD3C13|R(6), AcD3C13|R<C13N15>(5)	144	1073.07	2
	M	A	A	NatA	4	Ace(4)	Ace	AAAEE	AAAEEGCSVGAEADR	R	100	100	0						0.969515	-0.0446649	-0.241788		2	16	P40855	PEX19_HUMAN	Peroxisomal biogenesis factor 19		Ace|R<C13N15>(2), Ace|R(2)	92	767.826	2
	-	M	E	NatB	2	Ace(2)	Ace	MENQL	MENQLAKSTEER	R	100	100	0						1.81735	0.861836	1.98773		1	12	Q9UKG9	OCTC_HUMAN	Peroxisomal carnitine O-octanoyltransferase		Ace|R(1), Ace|R<C13N15>(1)	108	770.867	2
	-	M	E	NatB	2	Ace(2)	Ace	MESTG	MESTGSVGEAPGGPR	R	100	100	0						1.33253	0.414168	0.886701		1	15	Q6QHF9	PAOX_HUMAN	Peroxisomal N(1)-acetyl-spermine/spermidine oxidase		Ace|R<C13N15>(1), Ace|R(1)	63	745.333	2
	M	S	A	NatA	1	Ace(1)	Ace	SAVCG	SAVCGGAAR	R<C13N15>	100	100	-1.33487e-06						1.73965	0.798797	1.83269		2	10	O00628	PEX7_HUMAN	Peroxisomal targeting signal 2 receptor		Ace|R<C13N15>(1)	49	450.716	2
	M	G	G	NatA	3	AcD3C13(3)	AcD3C13	GGLEK	GGLEKKKYER	R	0	0	0						0.933163	-0.0997985	-0.377388		2	11	O00541	PESC_HUMAN	Pescadillo homolog		AcD3C13|R(2), AcD3C13|R<C13N15>(1)	61	698.416	2
	M	A	D	NatA	7	Ace(6), AcD3C13(1)	Ace	ADGKA	ADGKAGDEKPEKSQR	R	74	92	18	√			√		0.869536	-0.201682	-0.627968		2	16	Q8WW12	PCNP_HUMAN	PEST proteolytic signal-containing nuclear protein		Ace|R(6), AcD3C13|R(1)	81	899.965	2
	-	M	E	NatB	4	Ace(4)	Ace	MEPAA	MEPAAAATVQR	R	100	100	0						1.76473	0.819452	1.88349		1	11	O60346	PHLP1_HUMAN	PH domain leucine-rich repeat-containing protein phosphatase 1		Ace|R(2), Ace|R<C13N15>(2)	109	601.795	2
	M	S	S	NatA	6	Ace(6)	Ace	SSSVE	SSSVEQKKGPTR	R	100	100	0						1.23388	0.303206	0.613793		2	13	Q8IWS0	PHF6_HUMAN	PHD finger protein 6		Ace|R(4), Ace|R<C13N15>(2)	70	720.394	2
	M	A	D	NatA	15	Ace(15)	Ace	ADGQV	ADGQVAELLLR	R<C13N15>	100	100	0						0.944546	-0.082307	-0.334369		2	12	Q9Y285	SYFA_HUMAN	Phenylalanine--tRNA ligase alpha subunit		Ace|R(5), Ace|R<C13N15>(10)	88	618.839	2
	M	P	T	none	5	AcD3C13(5)	AcD3C13	PTVSV	PTVSVKR	R	0	0	0						0.93677	-0.0942332	-0.363701		2	8	Q9NSD9	SYFB_HUMAN	Phenylalanine--tRNA ligase beta subunit		AcD3C13|R(2), AcD3C13|R<C13N15>(3)	62	440.781	2
	M	A	A	NatA	6	AcD3C13(4), Ace(2)	AcD3C13	AATAL	AATALLEAGLAR	R	25	50	25	√					1.23715	0.30702	0.623173		2	13	Q8WUK0	PTPM1_HUMAN	Phosphatidylglycerophosphatase and protein-tyrosine phosphatase 1		AcD3C13|R(2), AcD3C13|R<C13N15>(2), Ace|R<C13N15>(1), Ace|R(1)	89	602.356	2
	M	T	A	NatA	2	Ace(2)	Ace	TAIIK	TAIIKEIVSR	R	100	100	0						1.41794	0.503796	1.10714		2	11	P60484	PTEN_HUMAN	Phosphatidylinositol 3,4,5-trisphosphate 3-phosphatase and dual-specificity protein phosphatase PTEN		Ace|R<C13N15>(1), Ace|R(1)	64	609.874	2
	M	A	G	NatA	2	Ace(2)	Ace	AGPEG	AGPEGFQYR	R<C13N15>	N.D.	N.D.	N.D.						1.43977	0.525838	1.16135		2	10	O00459	P85B_HUMAN	Phosphatidylinositol 3-kinase regulatory subunit beta		Ace|R<C13N15>(1), Ace|R(1)	44	538.755	2
	-	M	D	NatB	2	Ace(2)	Ace	MDETS	MDETSPLVSPER	R	100	100	0						1.26785	0.342384	0.71015		1	12	Q9BTU6	P4K2A_HUMAN	Phosphatidylinositol 4-kinase type 2-alpha		Ace|R(1), Ace|R<C13N15>(1)	40	709.827	2
	-	M	V	other	3	Ace(2), AcD3C13(1)	Ace	MVLLK	MVLLKEYR	R<C13N15>	71	67	-4						0.53824	-0.893678	-2.32992		1	8	Q00169	PIPNA_HUMAN	Phosphatidylinositol transfer protein alpha isoform		Ace|R<C13N15>(1), AcD3C13|R(1), Ace|R(1)	62	583.827	2
	M	V	L	NatA	13	AcD3C13(13)	AcD3C13	VLLKE	VLLKEYR	R<C13N15>	0	0	0						0.94502	-0.0815832	-0.332588		2	8	Q00169	PIPNA_HUMAN	Phosphatidylinositol transfer protein alpha isoform		AcD3C13|R<C13N15>(6), AcD3C13|R(7)	61	512.822	2
	-	M	V	other	4	AcD3C13(2), Ace(2)	Ace	MVLIK	MVLIKEFR	R	53	49	-4						0.4755	-1.07248	-2.76968	99% siCTR	1	8	P48739	PIPNB_HUMAN	Phosphatidylinositol transfer protein beta isoform		AcD3C13|R(1), Ace|R<C13N15>(1), AcD3C13|R<C13N15>(1), Ace|R(1)	66	570.826	2
	M	V	L	NatA	13	AcD3C13(13)	AcD3C13	VLIKE	VLIKEFR	R	0	0	0						0.700858	-0.512805	-1.39317		2	8	P48739	PIPNB_HUMAN	Phosphatidylinositol transfer protein beta isoform		AcD3C13|R<C13N15>(7), AcD3C13|R(6)	59	499.82	2
	M	S	G	NatA	1	Ace(1)	Ace	SGQSL	SGQSLTDR	R<C13N15>	100	100	0						0.93811	-0.092171	-0.358629		2	9	Q13492	PICAL_HUMAN	Phosphatidylinositol-binding clathrin assembly protein		Ace|R<C13N15>(1)	53	458.224	2
	M	V	K	NatA	3	AcD3C13(3)	AcD3C13	VKIVT	VKIVTVKTQAYQDQKPGTSGLR	R	0	0	0						1.82335	0.866589	1.99942		2	23	P36871	PGM1_HUMAN	Phosphoglucomutase-1		AcD3C13|R(3)	104	1303.25	2
	M	A	A	NatA	3	Ace(3)	Ace	AAPEG	AAPEGSGLGEDAR	R<C13N15>	95.0764	99.9947	4.91826	√				(√)	1.01462	0.0209329	-0.080452		2	14	Q96G03	PGM2_HUMAN	Phosphoglucomutase-2		Ace|R(2), Ace|R<C13N15>(1)	97	641.301	2
	M	S	L	NatA	12	Ace(12)	Ace	SLSNK	SLSNKLTLDKLDVKGKR	R	96	100	4						1.22341	0.290906	0.583541		2	18	P00558	PGK1_HUMAN	Phosphoglycerate kinase 1		Ace|R(12)	113	1073.15	2
	M	A	A	NatA	23	Ace(23)	Ace	AAYKL	AAYKLVLIR	R	95	100	5	√				(√)	1.35915	0.442709	0.956897		2	10	P18669	PGAM1_HUMAN	Phosphoglycerate mutase 1	Q8N0Y7 (2-10)	Ace|R<C13N15>(12), Ace|R(11)	62	568.364	2
	M	A	V	NatA	2	Ace(2)	Ace	AVTAQ	AVTAQAAR	R	100	100	0						0.78608	-0.347252	-0.985995		2	9	Q92871	PMM1_HUMAN	Phosphomannomutase 1		Ace|R<C13N15>(1), Ace|R(1)	69	415.23	2
	M	A	A	NatA	7	Ace(7)	Ace	AAPGP	AAPGPALCLFDVDGTLTAPR	R	100	100	0						0.996612	-0.00489615	-0.143978		2	21	O15305	PMM2_HUMAN	Phosphomannomutase 2		Ace|R(3), Ace|R<C13N15>(4)	61	1042.53	2
	M	A	P	none	2	AcD3C13(2)	AcD3C13	APLGG	APLGGAPR	R	0	0	0						1.22227	0.289563	0.580238		2	9	Q15126	PMVK_HUMAN	Phosphomevalonate kinase		AcD3C13|R<C13N15>(1), AcD3C13|R(1)	51	393.235	2
	M	A	E	NatA	7	Ace(7)	Ace	AEMDP	AEMDPVAEFPQPPGAAR	R	100	100	0						1.03211	0.0455907	-0.0198067		2	18	Q9HAB8	PPCS_HUMAN	Phosphopantothenate--cysteine ligase		Ace|R(4), Ace|R<C13N15>(3)	63	920.93	2
	-	M	E	NatB	3	Ace(3)	Ace	MEPKA	MEPKASCPAAAPLMER	R<C13N15>	100	100	0						0.95697	-0.0634544	-0.288001		1	16	Q96CD2	COAC_HUMAN	Phosphopantothenoylcysteine decarboxylase		Ace|R<C13N15>(2), Ace|R(1)	61	945.444	2
	M	A	G	NatA	2	Ace(2)	Ace	AGSSE	AGSSEEAPDYGR	R	89	100	11	√					0.911677	-0.133406	-0.460045		2	13	Q9NRG1	PRDC1_HUMAN	Phosphoribosyltransferase domain-containing protein 1		Ace|R<C13N15>(1), Ace|R(1)	75	640.773	2
	M	S	M	NatA	1	Ace(1)	Ace	SMLAE	SMLAER	R	100	100	0						0.82729	-0.273535	-0.80469		2	7	Q96BK5	PINX1_HUMAN	PIN2/TERF1-interacting telomerase inhibitor 1		Ace|R(1)	34	382.684	2
	M	G	S	NatA	3	AcD3C13(1), Ace(2)	Ace	GSSKK	GSSKKVTLSVLSR	R	41	80	39	√					1.05436	0.0763687	0.055891		2	14	O00625	PIR_HUMAN	Pirin		AcD3C13|R(1), Ace|R(1), Ace|R<C13N15>(1)	71	749.451	2
	-	M	D	NatB	2	Ace(2)	Ace	MDAFK	MDAFKGGMSLER	R<C13N15>	100	100	0						1.78338	0.834614	1.92078		1	12	P78337	PITX1_HUMAN	Pituitary homeobox 1		Ace|R(1), Ace|R<C13N15>(1)	85	736.841	2
	M	A	A	NatA	1	Ace(1)	Ace	AAPGA	AAPGAPAEYGYIR	R	100	100	0						1.7392	0.798424	1.83177		2	14	Q99959	PKP2_HUMAN	Plakophilin-2		Ace|R(1)	56	689.344	2
	M	P	A	none	1	AcD3C13(1)	AcD3C13	PAPEQ	PAPEQASLVEEGQPQTR	R	0	0	0						1.5144	0.598746	1.34067		2	18	Q99569	PKP4_HUMAN	Plakophilin-4		AcD3C13|R(1)	53	942.476	2
	-	M	E	NatB	3	Ace(3)	Ace	MENST	MENSTTTISR	R	100	100	0						1.3304	0.411864	0.881034		1	10	Q14651	PLSI_HUMAN	Plastin-1		Ace|R(2), Ace|R<C13N15>(1)	81	599.275	2
	-	M	V	other	1	Ace(1)	Ace	MVLSQ	MVLSQR	R	N.D.	N.D.	N.D.						N.D.				1	6	P43034	LIS1_HUMAN	Platelet-activating factor acetylhydrolase IB subunit alpha	P49750 (1251-1256)	Ace|R(1)	47	396.208	2
	M	S	G	NatA	2	Ace(2)	Ace	SGEEN	SGEENPASKPTPVQDVQGDGR	R	93	100	7	√				√	1.28955	0.366873	0.77038		2	22	Q15102	PA1B3_HUMAN	Platelet-activating factor acetylhydrolase IB subunit gamma		Ace|R(2)	92	1129.04	2
	-	M	E	NatB	1	Ace(1)	Ace	MEPGE	MEPGEVKDR	R<C13N15>	100	100	0						0.97503	-0.0364815	-0.221662		1	9	Q8IWE5	PKHM2_HUMAN	Pleckstrin homology domain-containing family M member 2		Ace|R<C13N15>(1)	51	588.283	2
	-	M	E	NatB	3	Ace(3)	Ace	MEEEG	MEEEGVKEAGEKPR	R<C13N15>	100	100	0						1.1446	0.194844	0.347277		1	14	Q8TD55	PKHO2_HUMAN	Pleckstrin homology domain-containing family O member 2		Ace|R(1), Ace|R<C13N15>(2)	105	875.929	2
	R	M	L	NatC or other	8	Ace(8)	Ace	MLESS	MLESSGCKALKEGVLEKR	R	91	89	-2						0.784656	-0.349867	-0.992427		142	159	Q8WV24	PHLA1_HUMAN	Pleckstrin homology-like domain family A member 1		Ace|R(5), Ace|R<C13N15>(3)	115	1117.59	2
	-	M	K	other	5	Ace(4), AcD3C13(1)	Ace	MKSPD	MKSPDEVLR	R<C13N15>	95	97	2						0.703947	-0.506461	-1.37757		1	9	Q53GA4	PHLA2_HUMAN	Pleckstrin homology-like domain family A member 2		Ace|R(2), Ace|R<C13N15>(2), AcD3C13|R<C13N15>(1)	67	595.309	2
	M	T	A	NatA	6	Ace(6)	Ace	TAAAT	TAAATATVLKEGVLEKR	R	85	100	15	√					0.853695	-0.228208	-0.693209		2	18	Q9Y5J5	PHLA3_HUMAN	Pleckstrin homology-like domain family A member 3		Ace|R(4), Ace|R<C13N15>(2)	100	947.551	2
	-	M	E	NatB	3	Ace(3)	Ace	MEDGV	MEDGVLKEGFLVKR	R	100	100	0						0.567803	-0.816537	-2.14019		1	14	Q9NYT0	PLEK2_HUMAN	Pleckstrin-2		Ace|R<C13N15>(2), Ace|R(1)	67	886.982	2
	M	V	A	NatA	1	AcD3C13(1)	AcD3C13	VAGML	VAGMLMPR	R<C13N15>	0	0	0						N.D.				2	9	Q15149	PLEC_HUMAN	Plectin		AcD3C13|R<C13N15>(1)	42	482.253	2
	-	M	K	other	2	AcD3C13(2)	AcD3C13	MKQLP	MKQLPAATVR	R	0	0	0						0.89788	-0.155405	-0.514153		1	10	P54277	PMS1_HUMAN	PMS1 protein homolog 1		AcD3C13|R<C13N15>(1), AcD3C13|R(1)	63	612.857	2
	M	A	E	NatA	7	Ace(7)	Ace	AESSD	AESSDKLYR	R<C13N15>	100	100	0						1.1329	0.180023	0.310827		2	10	P09874	PARP1_HUMAN	Poly [ADP-ribose] polymerase 1		Ace|R(4), Ace|R<C13N15>(3)	65	584.297	2
	-	M	K	other	5	AcD3C13(4), Ace(1)	AcD3C13	MKEMS	MKEMSANTVLDSQR	R<C13N15>	23	32	9						1.15421	0.206911	0.376958		1	14	Q9BWT3	PAPOG_HUMAN	Poly(A) polymerase gamma		AcD3C13|R<C13N15>(2), AcD3C13|R(2), Ace|R(1)	82	582.617	3
	M	A	A	NatA	6	Ace(6)	Ace	AAAAM	AAAAMAAAAGGGAGAAR	R<C13N15>	100	100	0						1.00528	0.00759739	-0.113251		2	18	Q9NX46	ARHL2_HUMAN	Poly(ADP-ribose) glycohydrolase ARH3		Ace|R<C13N15>(3), Ace|R(3)	124	692.338	2
	M	A	A	NatA	10	Ace(8), AcD3C13(2)	Ace	AAAAA	AAAAAAAAAAGAAGGR	R<C13N15>	90	100	10	√				√	1.06943	0.0968474	0.106258		2	17	Q86U42	PABP2_HUMAN	Polyadenylate-binding protein 2		Ace|R<C13N15>(4), Ace|R(4), AcD3C13|R(2)	118	625.828	2
	M	A	E	NatA	1	Ace(1)	Ace	AEASS	AEASSANLGSGCEEKR	R	100	100	0						1.15141	0.203402	0.368326		2	17	Q6P1K2	PMF1_HUMAN	Polyamine-modulated factor 1		Ace|R(1)	81	877.902	2
	M	A	S	NatA	1	Ace(1)	Ace	ASPQG	ASPQGGQIAIAMR	R	100	100	0						1.00189	0.00272412	-0.125236		2	14	Q9BSM1	PCGF1_HUMAN	Polycomb group RING finger protein 1		Ace|R(1)	54	679.348	2
	M	P	L	none	4	AcD3C13(4)	AcD3C13	PLPVA	PLPVALQTR	R<C13N15>	0	0	0						0.976875	-0.0337541	-0.214954		2	10	O60828	PQBP1_HUMAN	Polyglutamine-binding protein 1		AcD3C13|R(2), AcD3C13|R<C13N15>(2)	54	526.328	2
	M	A	D	NatA	1	Ace(1)	Ace	ADISL	ADISLDELIR	R	100	100	0						1.27704	0.352804	0.735777		2	11	Q9BY77	PDIP3_HUMAN	Polymerase delta-interacting protein 3		Ace|R(1)	64	593.82	2
	-	M	E	NatB	1	Ace(1)	Ace	MEDPT	MEDPTLYIVER	R	100	100	0						1.63366	0.708111	1.60965		1	11	Q6NZI2	PTRF_HUMAN	Polymerase I and transcript release factor		Ace|R(1)	55	712.343	2
	M	A	D	NatA	1	Ace(1)	Ace	ADSGL	ADSGLLLKR	R<C13N15>	100	100	0						0.70192	-0.510621	-1.3878		2	10	Q5SY16	NOL9_HUMAN	Polynucleotide 5'-hydroxyl-kinase NOL9		Ace|R<C13N15>(1)	35	536.323	2
	-	M	D	NatB	7	Ace(7)	Ace	MDGIV	MDGIVPDIAVGTKR	R	100	100	0						1.15615	0.209327	0.382899		1	14	P26599	PTBP1_HUMAN	Polypyrimidine tract-binding protein 1		Ace|R(4), Ace|R<C13N15>(3)	74	788.922	2
	-	M	D	NatB	2	Ace(2)	Ace	MDGVV	MDGVVTDLITVGLKR	R<C13N15>	100	100	0						1.43634	0.522401	1.1529		1	15	O95758	PTBP3_HUMAN	Polypyrimidine tract-binding protein 3		Ace|R(1), Ace|R<C13N15>(1)	45	866.481	2
	-	M	G	other	1	Ace(1)	Ace	MGEEA	MGEEANDDKKPTTKFELER	R	100	100	0						0.80502	-0.312903	-0.901516		1	19	Q92989	CLP1_HUMAN	Polyribonucleotide 5'-hydroxyl-kinase Clp1		Ace|R(1)	32	813.067	3
	M	G	E	NatA	2	Ace(2)	Ace	GEEAN	GEEANDDKKPTTKFELER	R	61	85	24	√					1.12046	0.164097	0.271657		2	19	Q92989	CLP1_HUMAN	Polyribonucleotide 5'-hydroxyl-kinase Clp1		Ace|R(2)	89	1145.58	2
	M	S	G	NatA	7	Ace(7)	Ace	SGNGN	SGNGNAAATAEENSPKMR	R	100	100	0						0.830244	-0.268393	-0.792042		2	19	P08397	HEM3_HUMAN	Porphobilinogen deaminase		Ace|R(3), Ace|R<C13N15>(4)	116	955.437	2
	-	M	D	NatB	2	Ace(2)	Ace	MDVNI	MDVNIAPLR	R<C13N15>	100	100	0						2.66705	1.41524	3.34883	99% siNatA	1	9	O75915	PRAF3_HUMAN	PRA1 family protein 3		Ace|R(1), Ace|R<C13N15>(1)	77	548.788	2
	M	A	A	NatA	9	Ace(9)	Ace	AAVKD	AAVKDSCGKGEMATGNGR	R<C13N15>	100	100	0						0.972855	-0.0397033	-0.229586		2	19	P61758	PFD3_HUMAN	Prefoldin subunit 3		Ace|R<C13N15>(5), Ace|R(4)	140	985.966	2
	M	A	A	NatA	3	Ace(3)	Ace	AATMK	AATMKKAAAEDVNVTFEDQQKINKFAR	R	100	100	0						0.898663	-0.154147	-0.511058		2	28	Q9NQP4	PFD4_HUMAN	Prefoldin subunit 4		Ace|R(3)	74	818.432	4
	M	A	M	NatA	3	Ace(3)	Ace	AMQAA	AMQAAKR	R	100	100	0						0.93343	-0.0993863	-0.376375		2	8	Q9Y3B4	PM14_HUMAN	Pre-mRNA branch site protein p14		Ace|R(3)	50	440.737	2
	M	S	E	NatA	2	Ace(2)	Ace	SEQTP	SEQTPAEAGAAGAR	R	100	100	0						0.89812	-0.15502	-0.513204		2	15	O94913	PCF11_HUMAN	Pre-mRNA cleavage complex 2 protein Pcf11		Ace|R<C13N15>(1), Ace|R(1)	113	679.321	2
	M	A	G	NatA	1	Ace(1)	Ace	AGVFP	AGVFPYR	R	90.9091	92.6966	1.78754						0.843539	-0.245473	-0.735671		2	8	Q6P2Q9	PRP8_HUMAN	Pre-mRNA-processing-splicing factor 8		Ace|R(1)	38	426.224	2
	-	M	D	NatB	5	Ace(5)	Ace	MDILK	MDILKSEILR	R	100	100	0						1.28487	0.361622	0.757466		1	10	Q99633	PRP18_HUMAN	Pre-mRNA-splicing factor 18		Ace|R(3), Ace|R<C13N15>(2)	98	661.871	2
	M	A	T	NatA	5	Ace(5)	Ace	ATSLG	ATSLGSNTYNR	R	100	100	0						0.887915	-0.171507	-0.553753		2	12	Q9NW64	RBM22_HUMAN	Pre-mRNA-splicing factor RBM22		Ace|R<C13N15>(2), Ace|R(3)	92	613.294	2
	M	S	A	NatA	2	Ace(2)	Ace	SATVV	SATVVDAVNAAPLSGSKEMSLEEPKKMTR	R	100	100	0						0.868445	-0.203494	-0.632424		2	30	O95391	SLU7_HUMAN	Pre-mRNA-splicing factor SLU7		Ace|R(2)	95	1087.89	3
	-	M	T	other	2	Ace(2)	Ace	MTNEE	MTNEEPLPKKVR	R	100	100	0						0.91486	-0.128377	-0.447677		1	12	Q15007	FL2D_HUMAN	Pre-mRNA-splicing regulator WTAP		Ace|R<C13N15>(1), Ace|R(1)	58	797.434	2
	M	T	N	NatA	3	AcD3C13(1), Ace(2)	AcD3C13	TNEEP	TNEEPLPKKVR	R	35	85	50	√					0.878968	-0.186117	-0.589687		2	12	Q15007	FL2D_HUMAN	Pre-mRNA-splicing regulator WTAP		AcD3C13|R(1), Ace|R<C13N15>(1), Ace|R(1)	49	726.429	2
	M	G	K	NatA	1	AcD3C13(1)	AcD3C13	GKKGK	GKKGKVGKSR	R	0	0	0						0.98165	-0.0267194	-0.197652		2	11	Q8IY81	SPB1_HUMAN	pre-rRNA processing protein FTSJ3		AcD3C13|R(1)	70	640.426	2
	M	A	G	NatA	1	AcD3C13(1)	AcD3C13	AGELA	AGELADKKDR	R	3	11	8						1.07962	0.110528	0.139906		2	11	Q9BUQ8	DDX23_HUMAN	Probable ATP-dependent RNA helicase DDX23		AcD3C13|R(1)	52	622.35	2
	-	M	K	other	6	AcD3C13(6)	AcD3C13	MKDSL	MKDSLVLLGR	R	0	0	0						1.0239	0.0340795	-0.0481183		1	10	O76071	CIAO1_HUMAN	Probable cytosolic iron-sulfur protein assembly protein CIAO1		AcD3C13|R<C13N15>(3), AcD3C13|R(3)	64	621.365	2
	M	P	K	none	7	AcD3C13(7)	AcD3C13	PKVKS	PKVKSGAIGR	R	0	0	0						0.822724	-0.281519	-0.824326		2	11	Q9UNQ2	DIM1_HUMAN	Probable dimethyladenosine transferase		AcD3C13|R<C13N15>(3), AcD3C13|R(4)	63	577.371	2
	M	S	T	NatA	1	Ace(1)	Ace	STKQI	STKQITCR	R<C13N15>	100	100	0						1.17978	0.238518	0.454693		2	9	Q9H000	MKRN2_HUMAN	Probable E3 ubiquitin-protein ligase makorin-2		Ace|R<C13N15>(1)	41	546.788	2
	-	M	E	NatB	1	Ace(1)	Ace	MEPLA	MEPLAAYPLKCSGPR	R	100	100	0						2.20467	1.14056	2.67325	99% siNatA	1	15	Q8TED1	GPX8_HUMAN	Probable glutathione peroxidase 8		Ace|R(1)	37	897.948	2
	M	A	A	NatA	2	Ace(2)	Ace	AAEAL	AAEALAAEAVASR	R	100	100	0						0.95787	-0.0620982	-0.284665		2	14	A2RTX5	SYTC2_HUMAN	Probable threonine--tRNA ligase 2, cytoplasmic		Ace|R<C13N15>(1), Ace|R(1)	65	636.333	2
	M	P	A	none	5	AcD3C13(5)	AcD3C13	PAVLG	PAVLGFEGSANKIGVGVVR	R	0	0	0						1.37397	0.458348	0.995362		2	20	Q9NPF4	OSGEP_HUMAN	Probable tRNA threonylcarbamoyladenosine biosynthesis protein OSGEP		AcD3C13|R(3), AcD3C13|R<C13N15>(2)	64	655.38	3
	M	A	D	NatA	4	Ace(4)	Ace	ADEEL	ADEELEALR	R<C13N15>	100	100	0						0.8142	-0.296545	-0.861282		2	10	O14737	PDCD5_HUMAN	Programmed cell death protein 5		Ace|R(2), Ace|R<C13N15>(2)	82	549.271	2
	M	A	A	NatA	2	Ace(2)	Ace	AAYSY	AAYSYR	R	100	100	0						0.815789	-0.293731	-0.854362		2	7	O75340	PDCD6_HUMAN	Programmed cell death protein 6		Ace|R<C13N15>(1), Ace|R(1)	34	386.685	2
	M	S	G	NatA	2	AcD3C13(1), Ace(1)	Ace	SGEDE	SGEDEQQEQTIAEDLVVTKYKMGGDIANR	R	78.5086	100	21.4914	√					0.886653	-0.173559	-0.5588		2	30	Q9UQ80	PA2G4_HUMAN	Proliferation-associated protein 2G4		AcD3C13|R(1), Ace|R(1)	72	1126.21	3
	M	A	A	NatA	2	Ace(2)	Ace	AAAVL	AAAVLSGPSAGSAAGVPGGTGGLSAVSSGPR	R<C13N15>	100	100	0						0.76712	-0.382476	-1.07263		2	32	Q8IZL8	PELP1_HUMAN	Proline-, glutamic acid- and leucine-rich protein 1		Ace|R(1), Ace|R<C13N15>(1)	74	873.452	3
	-	M	E	NatB	2	Ace(2)	Ace	MEDLE	MEDLEEDVR	R<C13N15>	100	100	0						1.37726	0.461801	1.00385		1	9	Q6PGN9	PSRC1_HUMAN	Proline/serine-rich coiled-coil protein 1		Ace|R(1), Ace|R<C13N15>(1)	83	602.257	2
	-	M	D	NatB	1	Ace(1)	Ace	MDLPG	MDLPGDSSPPGQPR	R	100	100	0						1.67901	0.747611	1.7068		1	14	Q9BWN1	PRR14_HUMAN	Proline-rich protein 14		Ace|R(1)	74	756.345	2
	-	M	L	NatC or other	2	Ace(2)	Ace	MLSLQ	MLSLQYPDVYR	R	100	100	0						1.29327	0.371024	0.780588		1	11	P48147	PPCE_HUMAN	Prolyl endopeptidase		Ace|R(1), Ace|R<C13N15>(1)	66	721.853	2
	M	A	K	NatA	7	AcD3C13(4), Ace(3)	Ace	AKEEP	AKEEPQSISR	R	36	85	49	√					1.54168	0.624504	1.40402		2	11	Q96B96	TM159_HUMAN	Promethin		AcD3C13|R(2), Ace|R(2), AcD3C13|R<C13N15>(2), Ace|R<C13N15>(1)	54	617.325	2
	-	M	T	other	1	Ace(1)	Ace	MTTSG	MTTSGALFPSLVPGSR	R<C13N15>	100	100	0						0.57117	-0.808008	-2.11921		1	16	Q16186	ADRM1_HUMAN	Proteasomal ubiquitin receptor ADRM1		Ace|R<C13N15>(1)	58	844.932	2
	M	T	T	NatA	1	Ace(1)	Ace	TTSGA	TTSGALFPSLVPGSR	R<C13N15>	100	100	0						0.67097	-0.57568	-1.54781		2	16	Q16186	ADRM1_HUMAN	Proteasomal ubiquitin receptor ADRM1		Ace|R<C13N15>(1)	33	771.415	2
	M	A	K	NatA	2	Ace(2)	Ace	AKPCG	AKPCGVR	R<C13N15>	91	100	9	√					1.22843	0.29682	0.598087		2	8	Q9UL46	PSME2_HUMAN	Proteasome activator complex subunit 2		Ace|R(1), Ace|R<C13N15>(1)	45	443.743	2
	M	A	S	NatA	4	Ace(4)	Ace	ASLLK	ASLLKVDQEVKLKVDSFR	R	100	100	0						1.23412	0.303483	0.614473		2	19	P61289	PSME3_HUMAN	Proteasome activator complex subunit 3		Ace|R(4)	86	1129.66	2
	M	A	A	NatA	6	Ace(6)	Ace	AATFF	AATFFGEVVKAPCR	R	100	100	0						0.922275	-0.116731	-0.419034		2	15	O95456	PSMG1_HUMAN	Proteasome assembly chaperone 1		Ace|R<C13N15>(3), Ace|R(3)	61	547.952	3
	M	A	G	NatA	1	Ace(1)	Ace	AGLEV	AGLEVLFASAAPAITCR	R	88.3374	100	11.6626	√					0.998343	-0.00239319	-0.137822		2	18	Q92530	PSMF1_HUMAN	Proteasome inhibitor PI31 subunit		Ace|R(1)	55	894.97	2
	M	S	S	NatA	8	Ace(8)	Ace	SSIGT	SSIGTGYDLSASTFSPDGR	R	100	100	0						1.02065	0.0294882	-0.0594105		2	20	P25788	PSA3_HUMAN	Proteasome subunit alpha type-3		Ace|R(4), Ace|R<C13N15>(4)	97	980.451	2
	-	M	L	NatC or other	2	Ace(2)	Ace	MLSST	MLSSTAMYSAPGR	R<C13N15>	100	100	0						3.58519	1.84205	4.39855	99% siNatA	1	13	P20618	PSB1_HUMAN	Proteasome subunit beta type-1		Ace|R(1), Ace|R<C13N15>(1)	62	728.328	2
	-	M	L	NatC or other	2	Ace(2)	Ace	MLKPA	MLKPALEPR	R	100	100	0						3.80923	1.9295	4.61363	99% siNatA	1	9	P40306	PSB10_HUMAN	Proteasome subunit beta type-10		Ace|R(1), Ace|R<C13N15>(1)	49	580.328	2
	-	M	E	NatB	4	Ace(4)	Ace	MEAFL	MEAFLGSR	R<C13N15>	100	100	0						1.20074	0.263924	0.517179		1	8	P28070	PSB4_HUMAN	Proteasome subunit beta type-4		Ace|R(2), Ace|R<C13N15>(2)	72	489.733	2
	M	A	A	NatA	2	Ace(2)	Ace	AATLL	AATLLAAR	R<C13N15>	100	100	0						1.02974	0.0422801	-0.0279491		2	9	P28072	PSB6_HUMAN	Proteasome subunit beta type-6		Ace|R<C13N15>(1), Ace|R(1)	66	419.755	2
	M	A	L	NatA	2	Ace(2)	Ace	ALLDV	ALLDVCGAPR	R<C13N15>	100	100	0						0.57787	-0.791183	-2.07783		2	11	P28062	PSB8_HUMAN	Proteasome subunit beta type-8		Ace|R<C13N15>(2)	40	562.294	2
	M	A	A	NatA	2	Ace(2)	Ace	AAAAA	AAAAASASQDELNQLER	R<C13N15>	100	100	0						0.85657	-0.223357	-0.681278		2	18	Q5VYK3	ECM29_HUMAN	Proteasome-associated protein ECM29 homolog		Ace|R(1), Ace|R<C13N15>(1)	117	898.937	2
	M	A	A	NatA	4	Ace(4)	Ace	AAVQM	AAVQMDPELAKR	R	100	100	0						1.186	0.24611	0.473366		2	13	Q9Y312	AAR2_HUMAN	Protein AAR2 homolog		Ace|R(2), Ace|R<C13N15>(2)	91	717.374	2
	M	C	S	NatA	2	Ace(2)	Ace	CSLAS	CSLASGATGGR	R	100	100	0						0.41211	-1.2789	-3.27736	99% siCTR	2	12	O60678	ANM3_HUMAN	Protein arginine N-methyltransferase 3		Ace|R<C13N15>(1), Ace|R(1)	88	539.751	2
	M	A	A	NatA	14	Ace(14)	Ace	AAMAV	AAMAVGGAGGSR	R<C13N15>	100	100	0						1.01227	0.0175941	-0.0886637		2	13	O14744	ANM5_HUMAN	Protein arginine N-methyltransferase 5		Ace|R<C13N15>(7), Ace|R(7)	106	536.757	2
	-	M	K	other	2	AcD3C13(2)	AcD3C13	MKIFC	MKIFCSR	R<C13N15>	14	11	-3						1.11095	0.15179	0.241388		1	7	Q9NVM4	ANM7_HUMAN	Protein arginine N-methyltransferase 7		AcD3C13|R(1), AcD3C13|R<C13N15>(1)	48	531.276	2
	M	S	A	NatA	1	Ace(1)	Ace	SAPSE	SAPSEEEEYAR	R	100	100	0						0.98256	-0.0253826	-0.194364		2	12	Q8TD16	BICD2_HUMAN	Protein bicaudal D homolog 2		Ace|R(1)	52	655.281	2
	M	A	G	NatA	3	Ace(2), AcD3C13(1)	Ace	AGQED	AGQEDPVQR	R	67	96	29	√					0.847761	-0.23827	-0.717957		2	10	Q8WUW1	BRK1_HUMAN	Protein BRICK1		Ace|R<C13N15>(1), Ace|R(1), AcD3C13|R(1)	60	521.252	2
	-	M	V	other	3	Ace(3)	Ace	MVGFG	MVGFGANR	R<C13N15>	100	100	0						1.04704	0.0663212	0.0311793		1	8	Q6P4E1	CASC4_HUMAN	Protein CASC4		Ace|R(2), Ace|R<C13N15>(1)	70	460.22	2
	-	M	N	NatB or other	2	Ace(2)	Ace	MNDFG	MNDFGIKNMDQVAPVANSYR	R	100	100	0						0.83551	-0.259271	-0.769608		1	20	P15036	ETS2_HUMAN	Protein C-ets-2		Ace|R(1), Ace|R<C13N15>(1)	45	797.707	3
	-	M	L	NatC or other	2	AcD3C13(2)	AcD3C13	MLITV	MLITVYCVR	R	N.D.	N.D.	N.D.						N.D.				1	9	Q8WTU0	DDI1_HUMAN	Protein DDI1 homolog 1		AcD3C13|R<C13N15>(1), AcD3C13|R(1)	61
	M	S	A	NatA	4	Ace(4)	Ace	SASAP	SASAPAAEGEGTPTQPASEKEPEMPGPR	R	84	100	16	√					1.05769	0.08092	0.0670849		2	29	P35659	DEK_HUMAN	Protein DEK		Ace|R<C13N15>(2), Ace|R(2)	74	962.114	3
	-	M	E	NatB	5	Ace(5)	Ace	MEPPG	MEPPGGSLGPGR	R	100	100	0						0.722072	-0.469785	-1.28736		1	12	O60610	DIAP1_HUMAN	Protein diaphanous homolog 1		Ace|R<C13N15>(2), Ace|R(3)	80	606.788	2
	-	M	N	NatB or other	1	Ace(1)	Ace	MNTEE	MNTEELELLSDSKYR	R	100	100	0						1.17192	0.228874	0.430975		1	15	Q5JWR5	DOP1_HUMAN	Protein dopey-1		Ace|R(1)	87	966.965	2
	M	A	S	NatA	2	Ace(2)	Ace	ASSSG	ASSSGNDDDLTIPR	R<C13N15>	95	100	5	√				(√)	1.15701	0.210398	0.385534		2	15	Q01658	NC2B_HUMAN	Protein Dr1		Ace|R<C13N15>(1), Ace|R(1)	51	750.346	2
	M	A	E	NatA	5	Ace(5)	Ace	AENSV	AENSVLTSTTGR	R<C13N15>	100	100	0						2.19399	1.13356	2.65602	99% siNatA	2	13	Q9H8V3	ECT2_HUMAN	Protein ECT2		Ace|R<C13N15>(2), Ace|R(3)	53	644.324	2
	M	S	E	NatA	1	Ace(1)	Ace	SEQSI	SEQSICQAR	R<C13N15>	100	100	0						1.1243	0.169027	0.283782		2	10	Q8N8S7	ENAH_HUMAN	Protein enabled homolog	Q9UI08 (2-10)	Ace|R<C13N15>(1)	46	565.76	2
	-	M	D	NatB	2	Ace(2)	Ace	MDNQC	MDNQCTVQVR	R	100	100	0						1.48734	0.572734	1.27669		1	10	Q03111	ENL_HUMAN	Protein ENL		Ace|R<C13N15>(1), Ace|R(1)	56	654.787	2
	-	M	N	NatB or other	2	Ace(2)	Ace	MNSMK	MNSMKTEENKSFSAMEDDQR	R<C13N15>	100	100	0						0.60823	-0.717311	-1.89615		1	20	Q6SJ93	F111B_HUMAN	Protein FAM111B		Ace|R<C13N15>(1), Ace|R(1)	43	858.032	3
	-	M	D	NatB	4	Ace(4)	Ace	MDSVE	MDSVEKTTNR	R<C13N15>	100	100	0						0.922095	-0.117013	-0.419726		1	10	Q9NWS6	F118A_HUMAN	Protein FAM118A		Ace|R<C13N15>(2), Ace|R(2)	77	648.31	2
	M	A	S	NatA	1	Ace(1)	Ace	ASTGS	ASTGSQASDIDEIFGFFNDGEPPTKKPR	R	100	100	0						1.13797	0.186463	0.326664		2	29	Q9BPY3	F118B_HUMAN	Protein FAM118B		Ace|R(1)	75	1049.85	3
	M	A	Q	NatA	4	Ace(4)	Ace	AQEKM	AQEKMELDLEPDTSYGGTLR	R<C13N15>	100	100	0						1.40403	0.489569	1.07215		2	21	Q7Z309	F122B_HUMAN	Protein FAM122B		Ace|R(2), Ace|R<C13N15>(2)	80	1184.56	2
	M	A	E	NatA	2	Ace(2)	Ace	AEAEG	AEAEGVPTTPGPASGSTFR	R	100	100	0						2.04305	1.03072	2.40311		2	20	Q86VR2	F134C_HUMAN	Protein FAM134C		Ace|R(1), Ace|R<C13N15>(1)	66	937.451	2
	M	A	E	NatA	9	Ace(9)	Ace	AELQQ	AELQQLR	R<C13N15>	100	100	0						1.1023	0.140521	0.213673		2	8	Q96C01	F136A_HUMAN	Protein FAM136A	Q7RTS3 (159-165), Q9BRK4 (338-344)	Ace|R(5), Ace|R<C13N15>(4)	62	455.255	2
	-	M	D	NatB	1	Ace(1)	Ace	MDPLQ	MDPLQKR	R	100	100	0						1.88795	0.916821	2.12296		1	7	Q8NDB6	FA156_HUMAN	Protein FAM156A/FAM156B		Ace|R(1)	35	496.763	2
	-	M	D	NatB	3	Ace(3)	Ace	MDQEP	MDQEPVGGVER	R<C13N15>	100	100	0						1.10165	0.139662	0.211559		1	11	Q8N128	F177A_HUMAN	Protein FAM177A1		Ace|R(1), Ace|R<C13N15>(2)	51	642.792	2
	-	M	D	NatB	3	Ace(3)	Ace	MDGGD	MDGGDDGNLIIKKR	R	100	100	0						1.26919	0.343908	0.713898		1	14	Q9GZU8	F192A_HUMAN	Protein FAM192A		Ace|R(2), Ace|R<C13N15>(1)	74	842.438	2
	-	M	Y	NatC or other	4	Ace(4)	Ace	MYTIT	MYTITKGPSKLVAQR	R	100	100	0						0.866765	-0.206287	-0.639295		1	15	Q9BUT9	F195A_HUMAN	Protein FAM195A		Ace|R<C13N15>(2), Ace|R(2)	65	923.016	2
	M	A	T	NatA	1	Ace(1)	Ace	ATEPE	ATEPEAAEPVVPSLVDR	R	N.D.	N.D.	N.D.						N.D.				2	18	Q9NX38	F206A_HUMAN	Protein FAM206A		Ace|R(1)	53	911.466	2
	-	M	M	other	1	Ace(1)	Ace	MMEEI	MMEEIDR	R	N.D.	N.D.	N.D.						N.D.				1	7	Q8IW50	F219A_HUMAN	Protein FAM219A		Ace|R(1)	34	499.202	2
	M	A	Q	NatA	3	Ace(3)	Ace	AQYKG	AQYKGAASEAGR	R	100	100	0						0.81963	-0.286955	-0.837697		2	13	Q14320	FA50A_HUMAN	Protein FAM50A		Ace|R<C13N15>(2), Ace|R(1)	85	649.328	2
	M	A	A	NatA	2	Ace(2)	Ace	AASAL	AASALYACTKCTQR	R<C13N15>	94	100	6	√					0.832917	-0.263756	-0.780638		2	15	Q5HYJ3	FA76B_HUMAN	Protein FAM76B		Ace|R(1), Ace|R<C13N15>(1)	45	850.409	2
	-	M	A	other	2	Ace(2)	Ace	MAPEE	MAPEENAGTELLLQSFER	R	100	100	0						0.78723	-0.345143	-0.980808		1	18	Q96G04	FA86A_HUMAN	Protein FAM86A		Ace|R<C13N15>(1), Ace|R(1)	61	1047	2
	-	M	E	NatB	6	Ace(6)	Ace	MEATG	MEATGVLPFVR	R<C13N15>	100	100	0						0.773007	-0.371447	-1.0455		1	11	Q13045	FLII_HUMAN	Protein flightless-1 homolog		Ace|R(4), Ace|R<C13N15>(2)	85	644.336	2
	-	M	F	NatC or other	3	AcD3C13(2), Ace(1)	AcD3C13	MFGCL	MFGCLVAGR	R<C13N15>	12	8	-4						0.99555	-0.00643432	-0.147761		1	9	Q53FT3	HIKES_HUMAN	Protein Hikeshi		AcD3C13|R<C13N15>(1), AcD3C13|R(1), Ace|R(1)	55	542.269	2
	-	M	F	NatC or other	2	Ace(2)	Ace	MFSVE	MFSVESLER	R	100	100	0						0.71606	-0.481848	-1.31703		1	9	Q86VS8	HOOK3_HUMAN	Protein Hook homolog 3		Ace|R<C13N15>(1), Ace|R(1)	83	578.271	2
	M	A	D	NatA	1	Ace(1)	Ace	ADVFP	ADVFPGNDSTASQDVANR	R	100	100	0						0.79102	-0.338214	-0.963766		2	19	P17252	KPCA_HUMAN	Protein kinase C alpha type		Ace|R(1)	52	953.433	2
	M	A	A	NatA	3	Ace(3)	Ace	AALGE	AALGEPVR	R	100	100	0						0.935547	-0.0961185	-0.368337		2	9	Q9NUP9	LIN7C_HUMAN	Protein lin-7 homolog C		Ace|R(2), Ace|R<C13N15>(1)	70	427.74	2
	M	A	A	NatA	2	Ace(2)	Ace	AAPPG	AAPPGEYFSVGSQVSCR	R	100	100	0						0.78114	-0.356347	-1.00836		2	18	Q3MHD2	LSM12_HUMAN	Protein LSM12 homolog		Ace|R<C13N15>(1), Ace|R(1)	97	927.428	2
	-	M	E	NatB	10	Ace(10)	Ace	MESDF	MESDFYLR	R	100	100	0						1.04376	0.0617873	0.0200283		1	8	P61326	MGN_HUMAN	Protein mago nashi homolog		Ace|R(5), Ace|R<C13N15>(5)	70	559.745	2
	M	A	V	NatA	8	Ace(8)	Ace	AVASD	AVASDFYLR	R<C13N15>	95	100	5	√					1.60063	0.678642	1.53717		2	10	Q96A72	MGN2_HUMAN	Protein mago nashi homolog 2		Ace|R(4), Ace|R<C13N15>(4)	84	547.281	2
	M	S	A	NatA	1	Ace(1)	Ace	SAGGA	SAGGASVPPPPNPAVSFPPPR	R	84	100	16	√					1.4542	0.540224	1.19673		2	22	Q969L2	MAL2_HUMAN	Protein MAL2		Ace|R(1)	41	1021.03	2
	-	M	Q	NatB or other	1	Ace(1)	Ace	MQENL	MQENLR	R<C13N15>	96	92	-4						1.13606	0.184039	0.320704		1	6	Q8NHV4	NEDD1_HUMAN	Protein NEDD1		Ace|R<C13N15>(1)	37	429.704	2
	-	M	L	NatC or other	1	Ace(1)	Ace	MLPSL	MLPSLQESMDGDEKELESSEEGGSAEER	R	83	85	2						0.88791	-0.171515	-0.553773		1	28	Q9HAS0	NJMU_HUMAN	Protein Njmu-R1		Ace|R(1)	85	1064.12	3
	-	M	L	NatC or other	1	AcD3C13(1)	AcD3C13	MLLPS	MLLPSDVAR	R	0	0	0						1.88168	0.912021	2.11116		1	9	Q14207	NPAT_HUMAN	Protein NPAT		AcD3C13|R(1)	37	532.791	2
	M	A	L	NatA	2	Ace(2)	Ace	ALFPA	ALFPAFAGLSEAPDGGSSR	R	100	100	0						0.85532	-0.225464	-0.68646		2	20	Q9H7Z3	NRDE2_HUMAN	Protein NRDE2 homolog		Ace|R(1), Ace|R<C13N15>(1)	95	946.463	2
	M	A	E	NatA	4	Ace(4)	Ace	AEAGA	AEAGAGLSETVTETTVTVTTEPENR	R	100	100	0						1.02483	0.0353811	-0.0449171		2	26	O60927	PP1RB_HUMAN	Protein phosphatase 1 regulatory subunit 11		Ace|R(3), Ace|R<C13N15>(1)	72	869.422	3
	-	M	K	other	8	AcD3C13(6), Ace(2)	AcD3C13	MKMAD	MKMADAKQKR	R<C13N15>	9	9	0						1.02899	0.0412262	-0.0305413		1	10	O14974	MYPT1_HUMAN	Protein phosphatase 1 regulatory subunit 12A		AcD3C13|R(4), AcD3C13|R<C13N15>(2), Ace|R(2)	73	718.897	2
	M	S	G	NatA	1	Ace(1)	Ace	SGEDG	SGEDGPAAGPGAAAAAAR	R<C13N15>	N.D.	100	N.D.						N.D.				2	19	Q9BZL4	PP12C_HUMAN	Protein phosphatase 1 regulatory subunit 12C		Ace|R<C13N15>(1)	68	774.868	2
	M	A	D	NatA	8	Ace(8)	Ace	ADSGT	ADSGTAGGAALAAPAPGPGSGGPGPR	R	100	100	0						1.32136	0.402024	0.856832		2	27	Q96C90	PP14B_HUMAN	Protein phosphatase 1 regulatory subunit 14B		Ace|R(4), Ace|R<C13N15>(4)	121	1080.03	2
	M	S	V	NatA	4	Ace(4)	Ace	SVATG	SVATGSSETAGGASGGGAR	R<C13N15>	100	100	0						0.3397	-1.55767	-3.96298	99% siCTR	2	20	Q8TAE6	PP14C_HUMAN	Protein phosphatase 1 regulatory subunit 14C		Ace|R(2), Ace|R<C13N15>(2)	161	816.379	2
	-	M	E	NatB	1	Ace(1)	Ace	MEIAP	MEIAPQEAPPVPGADGDIEEAPAEAGSPSPASPPADGR	R	100	100	0						1.20741	0.271916	0.536835		1	38	O75864	PPR37_HUMAN	Protein phosphatase 1 regulatory subunit 37		Ace|R(1)	57	1246.91	3
	M	A	L	NatA	1	Ace(1)	Ace	ALVTV	ALVTVQR	R	100	100	0						N.D.				2	8	Q76I76	SSH2_HUMAN	Protein phosphatase Slingshot homolog 2		Ace|R(1)	38	414.75	2
	M	A	E	NatA	1	Ace(1)	Ace	AETSE	AETSEEVAVLVQR	R	100	100	0						0.718009	-0.477925	-1.30738		2	14	Q7Z6K3	PTAR1_HUMAN	Protein prenyltransferase alpha subunit repeat-containing protein 1		Ace|R(1)	32	736.884	2
	-	M	E	NatB	2	Ace(2)	Ace	MEDYL	MEDYLQGCR	R<C13N15>	100	100	0						1.27275	0.347949	0.723837		1	9	Q86TP1	PRUNE_HUMAN	Protein prune homolog		Ace|R(1), Ace|R<C13N15>(1)	79	620.254	2
	-	M	D	NatB	2	Ace(2)	Ace	MDQCV	MDQCVTVER	R<C13N15>	100	100	0						0.70541	-0.503466	-1.3702		1	9	Q9H871	RMD5A_HUMAN	Protein RMD5 homolog A		Ace|R<C13N15>(1), Ace|R(1)	82	603.262	2
	M	A	T	NatA	3	Ace(3)	Ace	ATVMA	ATVMAATAAER	R<C13N15>	100	100	0						1.49353	0.578729	1.29144		2	12	Q9GZN7	ROGDI_HUMAN	Protein rogdi homolog		Ace|R(1), Ace|R<C13N15>(2)	69	580.286	2
	-	M	P	none	1	AcD3C13(1)	AcD3C13	MPGIS	MPGISAR	R	N.D.	N.D.	N.D.						N.D.				1	7	Q96FB5	RRNAD_HUMAN	Protein RRNAD1		AcD3C13|R(1)	35	397.713	2
	M	A	N	NatA	3	Ace(3)	Ace	ANLEE	ANLEESFPR	R	82	98	16	√					0.93254	-0.100763	-0.379761		2	10	Q14690	RRP5_HUMAN	Protein RRP5 homolog		Ace|R(2), Ace|R<C13N15>(1)	74	552.77	2
	-	M	A	other	1	Ace(1)	Ace	MAKIS	MAKISSPTETER	R	100	100	0						1.05872	0.0823211	0.0705308		1	12	P31949	S10AB_HUMAN	Protein S100-A11		Ace|R(1)	32	727.861	2
	M	A	K	NatA	19	Ace(19)	Ace	AKISS	AKISSPTETER	R<C13N15>	100	100	0						0.822311	-0.282244	-0.826109		2	12	P31949	S10AB_HUMAN	Protein S100-A11		Ace|R<C13N15>(10), Ace|R(9)	69	659.347	2
	M	T	C	NatA	2	Ace(2)	Ace	TCKMS	TCKMSQLER	R<C13N15>	100	100	0						0.42703	-1.22759	-3.15117	99% siCTR	2	10	P06702	S10A9_HUMAN	Protein S100-A9		Ace|R<C13N15>(1), Ace|R(1)	38	634.304	2
	R	M	E	NatB	2	Ace(2)	Ace	MEKKV	MEKKVDSR	R	100	100	0						1.45289	0.538925	1.19354		24	31	A8K8P3	SFI1_HUMAN	Protein SFI1 homolog		Ace|R<C13N15>(1), Ace|R(1)	37	572.802	2
	-	M	E	NatB	4	Ace(4)	Ace	MEALG	MEALGPGGDR	R<C13N15>	100	100	0						0.99262	-0.0106866	-0.15822		1	10	Q2M3G4	SHRM1_HUMAN	Protein Shroom1		Ace|R(2), Ace|R<C13N15>(2)	68	535.744	2
	M	S	L	NatA	1	Ace(1)	Ace	SLQSA	SLQSAQYLR	R	N.D.	N.D.	N.D.						N.D.				2	10	Q92540	SMG7_HUMAN	Protein SMG7		Ace|R(1)	43	554.293	2
	M	A	T	NatA	4	Ace(4)	Ace	ATNIE	ATNIEQIFR	R	100	100	0						0.87905	-0.185983	-0.589357		2	10	P18583	SON_HUMAN	Protein SON		Ace|R<C13N15>(2), Ace|R(2)	52	567.301	2
	-	M	E	NatB	2	Ace(2)	Ace	MEADI	MEADIITNLR	R<C13N15>	100	100	0						1.4965	0.581596	1.29849		1	10	Q96EA4	SPDLY_HUMAN	Protein Spindly		Ace|R(1), Ace|R<C13N15>(1)	75	622.315	2
	M	A	Q	NatA	4	Ace(4)	Ace	AQAAG	AQAAGPAGGGEPR	R	97	99	2						0.82309	-0.280878	-0.822749		2	14	Q08AE8	SPIR1_HUMAN	Protein spire homolog 1		Ace|R<C13N15>(2), Ace|R(2)	91	590.789	2
	M	A	V	NatA	1	Ace(1)	Ace	AVPGC	AVPGCNKDSVR	R<C13N15>	94	100	6	√					0.681114	-0.554032	-1.49457		2	12	Q8N9Q2	SR1IP_HUMAN	Protein SREK1IP1		Ace|R<C13N15>(1)	37	651.329	2
	M	S	V	NatA	4	Ace(4)	Ace	SVAFA	SVAFAAPR	R	100	100	0						1.06011	0.084214	0.0751863		2	9	Q15532	SSXT_HUMAN	Protein SSXT		Ace|R<C13N15>(2), Ace|R(2)	70	430.735	2
	M	T	T	NatA	3	Ace(3)	Ace	TTYLE	TTYLEFIQQNEER	R	100	100	0						0.73663	-0.440988	-1.21654		2	14	Q15436	SC23A_HUMAN	Protein transport protein Sec23A		Ace|R<C13N15>(2), Ace|R(1)	100	856.911	2
	M	A	T	NatA	5	Ace(5)	Ace	ATYLE	ATYLEFIQQNEER	R	100	100	0						0.933172	-0.0997851	-0.377355		2	14	Q15437	SC23B_HUMAN	Protein transport protein Sec23B		Ace|R(3), Ace|R<C13N15>(2)	107	841.898	2
	-	M	K	other	5	AcD3C13(5)	AcD3C13	MKLKE	MKLKEVDR	R<C13N15>	0	0	0						1.02906	0.0413318	-0.0302815		1	8	O94979	SC31A_HUMAN	Protein transport protein Sec31A		AcD3C13|R<C13N15>(1), AcD3C13|R(4)	70	593.345	2
	M	P	G	none	2	AcD3C13(2)	AcD3C13	PGPTP	PGPTPSGTNVGSSGR	R	0	0	0						1.69938	0.765008	1.74959		2	16	P60468	SC61B_HUMAN	Protein transport protein Sec61 subunit beta		AcD3C13|R(2)	93	709.355	2
	-	M	E	NatB	2	Ace(2)	Ace	MEDDA	MEDDAPVIYGLEFQAR	R	100	100	0						0.99658	-0.00494247	-0.144092		1	16	Q53HC9	TSSC1_HUMAN	Protein TSSC1		Ace|R<C13N15>(1), Ace|R(1)	102	956.444	2
	-	M	N	NatB or other	3	Ace(3)	Ace	MNPEK	MNPEKDFAPLTPNIVR	R	100	100	0						1.18022	0.23906	0.456027		1	16	Q08AM6	VAC14_HUMAN	Protein VAC14 homolog		Ace|R(3)	41	974.003	2
	M	A	T	NatA	4	Ace(4)	Ace	ATTAA	ATTAAPAGGAR	R<C13N15>	100	100	0						0.917125	-0.12481	-0.438903		2	12	Q9GZM5	YIPF3_HUMAN	Protein YIPF3		Ace|R<C13N15>(2), Ace|R(2)	79	498.261	2
	M	A	E	NatA	5	Ace(5)	Ace	AEAEE	AEAEESPGDPGTASPR	R	100	100	0						1.09244	0.127559	0.181793		2	17	Q96EC8	YIPF6_HUMAN	Protein YIPF6		Ace|R(3), Ace|R<C13N15>(2)	80	806.859	2
	M	A	E	NatA	10	Ace(10)	Ace	AEELV	AEELVLER	R	100	100	0						0.60762	-0.718759	-1.89971		2	9	P21980	TGM2_HUMAN	Protein-glutamine gamma-glutamyltransferase 2		Ace|R<C13N15>(5), Ace|R(5)	66	500.769	2
	M	A	D	NatA	2	Ace(2)	Ace	ADTLE	ADTLESSLEDPLR	R<C13N15>	100	100	0						1.0977	0.134484	0.198824		2	14	Q9H867	MT21D_HUMAN	Protein-lysine methyltransferase METTL21D		Ace|R(1), Ace|R<C13N15>(1)	62	749.369	2
	M	S	G	NatA	2	Ace(2)	Ace	SGVSE	SGVSEPLSR	R	≥95	100	N.D.						N.D.				2	10	Q14289	FAK2_HUMAN	Protein-tyrosine kinase 2-beta		Ace|R(1), Ace|R<C13N15>(1)	45	487.251	2
	M	S	D	NatA	11	Ace(11)	Ace	SDAAV	SDAAVDTSSEITTKDLKEKKEVVEEAENGR	R	100	100	0						1.1999	0.262917	0.514702		2	31	P06454	PTMA_HUMAN	Prothymosin alpha		Ace|R<C13N15>(2), Ace|R(9)	110	1170.26	3
	M	A	S	NatA	3	Ace(3)	Ace	ASGAY	ASGAYNPYIEIIEQPR	R	≥95	100	N.D.						0.840317	-0.250995	-0.749253		2	17	Q04864	REL_HUMAN	Proto-oncogene c-Rel		Ace|R<C13N15>(1), Ace|R(2)	90	931.968	2
	-	M	E	NatB	6	Ace(6)	Ace	MEMTE	MEMTEMTGVSLKR	R	100	100	0						1.02041	0.0291463	-0.0602513		1	13	Q96PZ0	PUS7_HUMAN	Pseudouridylate synthase 7 homolog		Ace|R(4), Ace|R<C13N15>(2)	72	825.38	2
	M	S	V	NatA	1	Ace(1)	Ace	SVACV	SVACVLKR	R	100	100	0						1.33047	0.411936	0.881212		2	9	Q14671	PUM1_HUMAN	Pumilio homolog 1		Ace|R(1)	70	511.294	2
	M	P	S	none	2	AcD3C13(2)	AcD3C13	PSKFS	PSKFSCR	R	0	0	0						1.38937	0.474431	1.03492		2	8	Q9HCE1	MOV10_HUMAN	Putative helicase MOV-10		AcD3C13|R(1), AcD3C13|R<C13N15>(1)	41	488.252	2
	-	M	G	other	1	Ace(1)	Ace	MGKGD	MGKGDPKKPR	R	N.D.	N.D.	N.D.						0.79813	-0.325304	-0.932015		1	10	B2RPK0	HGB1A_HUMAN	Putative high mobility group protein B1-like 1	P09429 (1-10)	Ace|R(1)	46	656.87	2
	M	G	K	NatA	17	AcD3C13(17)	AcD3C13	GKGDP	GKGDPKKPR	R<C13N15>	0	0	0						0.920534	-0.119457	-0.425739		2	10	B2RPK0	HGB1A_HUMAN	Putative high mobility group protein B1-like 1	P09429 (2-10)	AcD3C13|R(9), AcD3C13|R<C13N15>(8)	63	590.869	2
	M	G	L	NatA	1	AcD3C13(1)	AcD3C13	GLYAA	GLYAAAAGVLAGVESR	R<C13N15>	0	32	32	√					0.891515	-0.16567	-0.539398		2	17	Q96P11	NSUN5_HUMAN	Putative methyltransferase NSUN5		AcD3C13|R<C13N15>(1)	116	781.432	2
	-	M	K	other	2	AcD3C13(2)	AcD3C13	MKDKQ	MKDKQKKKKER	R	0	0	0						1.06519	0.091104	0.0921323		1	11	Q8IXJ9	ASXL1_HUMAN	Putative Polycomb group protein ASXL1		AcD3C13|R(2)	48	896.557	2
	M	A	T	NatA	1	Ace(1)	Ace	ATPAG	ATPAGLER	R	100	100	0						1.00642	0.0092325	-0.109229		2	9	O60231	DHX16_HUMAN	Putative pre-mRNA-splicing factor ATP-dependent RNA helicase DHX16		Ace|R(1)	56	428.73	2
	-	M	E	NatB	3	Ace(3)	Ace	MEEEG	MEEEGLECPNSSSEKR	R<C13N15>	100	100	0						1.4313	0.517326	1.14042		1	16	Q7L7V1	DHX32_HUMAN	Putative pre-mRNA-splicing factor ATP-dependent RNA helicase DHX32		Ace|R(2), Ace|R<C13N15>(1)	75	998.927	2
	M	A	D	NatA	2	Ace(2)	Ace	ADFAG	ADFAGPSSAGR	R<C13N15>	100	100	0						0.97331	-0.0390287	-0.227926		2	12	Q8IXW5	RPAP2_HUMAN	Putative RNA polymerase II subunit B1 CTD phosphatase RPAP2		Ace|R<C13N15>(1), Ace|R(1)	73	544.256	2
	M	A	A	NatA	4	Ace(4)	Ace	AAAEP	AAAEPSPR	R	100	100	0						0.959245	-0.0600288	-0.279576		2	9	Q53H96	P5CR3_HUMAN	Pyrroline-5-carboxylate reductase 3		Ace|R<C13N15>(2), Ace|R(2)	54	420.715	2
	M	A	G	NatA	4	Ace(4)	Ace	AGAAT	AGAATQASLESAPR	R	93	100	7	√					0.812532	-0.299504	-0.86856		2	15	Q9BXR0	TGT_HUMAN	Queuine tRNA-ribosyltransferase		Ace|R<C13N15>(2), Ace|R(2)	104	686.347	2
	M	A	T	NatA	4	Ace(4)	Ace	ATGQK	ATGQKLMR	R<C13N15>	100	100	0						2.18927	1.13045	2.64838	99% siNatA	2	9	Q08257	QOR_HUMAN	Quinone oxidoreductase		Ace|R(2), Ace|R<C13N15>(2)	66	510.28	2
	M	A	Q	NatA	2	Ace(2)	Ace	AQPGP	AQPGPASQPDVSLQQR	R<C13N15>	100	100	0						0.52456	-0.93082	-2.42127		2	17	Q15276	RABE1_HUMAN	Rab GTPase-binding effector protein 1		Ace|R<C13N15>(1), Ace|R(1)	58	865.938	2
	M	A	A	NatA	2	Ace(2)	Ace	AAAAP	AAAAPVAADDDER	R	91.458	100	8.542	√					0.666391	-0.58556	-1.57211		2	14	Q9H5N1	RABE2_HUMAN	Rab GTPase-binding effector protein 2		Ace|R<C13N15>(1), Ace|R(1)	77	657.302	2
	-	M	K	other	4	AcD3C13(4)	AcD3C13	MKQLP	MKQLPVLEPGDKPR	R	3	3	0						0.743935	-0.426752	-1.18152		1	14	Q7Z6M1	RABEK_HUMAN	Rab9 effector protein with kelch motifs		AcD3C13|R(2), AcD3C13|R<C13N15>(2)	80	589.004	3
	M	A	S	NatA	4	Ace(4)	Ace	ASLDD	ASLDDPGEVR	R	100	100	0						0.56066	-0.834802	-2.18511		2	11	Q9H1K0	RBNS5_HUMAN	Rabenosyn-5		Ace|R<C13N15>(2), Ace|R(2)	64	550.764	2
	-	M	D	NatB	1	Ace(1)	Ace	MDTMM	MDTMMLNVR	R	100	100	0						0.9001	-0.151843	-0.50539		1	9	Q9H0H5	RGAP1_HUMAN	Rac GTPase-activating protein 1		Ace|R(1)	33	600.757	2
	M	A	D	NatA	1	Ace(1)	Ace	ADDLK	ADDLKR	R<C13N15>	100	100	-2.59762e-06						1.22574	0.293653	0.590297		2	7	Q9UHA4	LTOR3_HUMAN	Ragulator complex protein LAMTOR3	Q58DX5 (284-289)	Ace|R<C13N15>(1)	41	408.726	2
	M	T	S	NatA	2	Ace(2)	Ace	TSALT	TSALTQGLER	R	99.7137	99.828	0.114334						1.61435	0.690953	1.56745		2	11	Q0VGL1	LTOR4_HUMAN	Ragulator complex protein LAMTOR4		Ace|R(1), Ace|R<C13N15>(1)	68	559.296	2
	-	M	N	NatB or other	4	Ace(4)	Ace	MNSPV	MNSPVDPGAR	R	100	100	0						1.05588	0.0784527	0.0610167		1	10	Q8TEU7	RPGF6_HUMAN	Rap guanine nucleotide exchange factor 6		Ace|R<C13N15>(2), Ace|R(2)	70	551.252	2
	-	M	M	other	2	Ace(2)	Ace	MMAAE	MMAAEAGSEEGGPVTAGAGGGGAAAGSSAYPAVCR	R<C13N15>	100	100	0						0.77476	-0.368179	-1.03746		1	35	P20936	RASA1_HUMAN	Ras GTPase-activating protein 1		Ace|R(1), Ace|R<C13N15>(1)	128	1070.47	3
	M	A	A	NatA	2	Ace(2)	Ace	AAAAP	AAAAPAAAAASSEAPAASATAEPEAGDQDSR	R<C13N15>	93	100	7	√					1.31301	0.392881	0.834346		2	32	Q15283	RASA2_HUMAN	Ras GTPase-activating protein 2		Ace|R(1), Ace|R<C13N15>(1)	97	945.769	3
	-	M	V	other	2	Ace(2)	Ace	MVMEK	MVMEKPSPLLVGR	R	98	96	-2						1.37967	0.464323	1.01006		1	13	Q13283	G3BP1_HUMAN	Ras GTPase-activating protein-binding protein 1	Q9UN86 (1-13)	Ace|R(1), Ace|R<C13N15>(1)	46	789.423	2
	M	V	M	NatA	10	AcD3C13(10)	AcD3C13	VMEKP	VMEKPSPLLVGR	R<C13N15>	1	1	0						1.41608	0.501906	1.10249		2	13	Q13283	G3BP1_HUMAN	Ras GTPase-activating protein-binding protein 1	Q9UN86 (2-13)	AcD3C13|R(6), AcD3C13|R<C13N15>(4)	72	723.422	2
	M	S	A	NatA	4	Ace(4)	Ace	SAADE	SAADEVDGLGVAR	R	100	100	0						1.09757	0.134313	0.198404		2	14	P46940	IQGA1_HUMAN	Ras GTPase-activating-like protein IQGAP1		Ace|R(3), Ace|R<C13N15>(1)	73	651.32	2
	M	S	K	NatA	3	Ace(3)	Ace	SKSLK	SKSLKKLVEESR	R	100	100	0						1.09851	0.135544	0.201431		2	13	Q15404	RSU1_HUMAN	Ras suppressor protein 1		Ace|R(2), Ace|R<C13N15>(1)	91	793.974	2
	-	M	D	NatB	2	Ace(2)	Ace	MDPGA	MDPGAALQR	R	100	100	0						1.22314	0.29059	0.582763		1	9	Q6IQ22	RAB12_HUMAN	Ras-related protein Rab-12		Ace|R(1), Ace|R<C13N15>(1)	85	508.745	2
	M	A	A	NatA	10	Ace(10)	Ace	AAAGG	AAAGGGGGGAAAAGR	R	100	100	0						0.750771	-0.413555	-1.14907		2	16	Q9UL25	RAB21_HUMAN	Ras-related protein Rab-21		Ace|R<C13N15>(6), Ace|R(4)	135	557.273	2
	M	A	G	NatA	2	AcD3C13(1), Ace(1)	Ace	AGGGA	AGGGAGDPGLGAAAAPAPETR	R<C13N15>	23	66	43	√		√			0.771949	-0.373423	-1.05036		2	22	Q13637	RAB32_HUMAN	Ras-related protein Rab-32		AcD3C13|R(1), Ace|R<C13N15>(1)	77	908.447	2
	-	M	N	NatB or other	3	Ace(3)	Ace	MNILA	MNILAPVR	R<C13N15>	100	100	0						1.26649	0.340836	0.706342		1	8	Q9BZG1	RAB34_HUMAN	Ras-related protein Rab-34		Ace|R(2), Ace|R<C13N15>(1)	55	491.275	2
	M	A	S	NatA	1	Ace(1)	Ace	ASAGD	ASAGDTQAGPR	R	100	100	0						1.2989	0.37729	0.796002		2	12	O95716	RAB3D_HUMAN	Ras-related protein Rab-3D		Ace|R(1)	67	536.754	2
	M	S	T	NatA	4	Ace(4)	Ace	STGGD	STGGDFGNPLR	R<C13N15>	100	100	0						0.941035	-0.0876797	-0.347583		2	12	P20340	RAB6A_HUMAN	Ras-related protein Rab-6A		Ace|R<C13N15>(2), Ace|R(2)	79	586.782	2
	-	M	N	NatB or other	2	Ace(2)	Ace	MNVTS	MNVTSIALR	R<C13N15>	100	100	0						1.33752	0.41956	0.899964		1	9	Q9H9A7	RMI1_HUMAN	RecQ-mediated genome instability protein 1		Ace|R(1), Ace|R<C13N15>(1)	73	536.788	2
	M	A	A	NatA	2	Ace(2)	Ace	AAAAD	AAAADSFSGGPAGVR	R	100	100	0						1.38101	0.465724	1.0135		2	16	Q96E14	RMI2_HUMAN	RecQ-mediated genome instability protein 2		Ace|R(1), Ace|R<C13N15>(1)	120	688.334	2
	-	M	F	NatC or other	1	Ace(1)	Ace	MFNGE	MFNGEPGPASSGASR	R	100	100	0						2.89964	1.53587	3.64551	99% siNatA	1	15	Q9UJD0	RIMS3_HUMAN	Regulating synaptic membrane exocytosis protein 3		Ace|R(1)	39	761.833	2
	-	M	D	NatB	4	Ace(4)	Ace	MDSEA	MDSEAFQSAR	R	100	100	0						0.969442	-0.0447728	-0.242054		1	10	Q8WUF5	IASPP_HUMAN	RelA-associated inhibitor		Ace|R<C13N15>(2), Ace|R(2)	75	600.255	2
	-	M	E	NatB	7	Ace(7)	Ace	METSA	METSALKQQEQPAATKIR	R	100	100	0						1.11117	0.152081	0.242105		1	18	P40937	RFC5_HUMAN	Replication factor C subunit 5		Ace|R(4), Ace|R<C13N15>(3)	134	1091.58	2
	-	M	V	other	2	Ace(2)	Ace	MVDMM	MVDMMDLPR	R<C13N15>	62	79	17	√					0.61235	-0.707572	-1.87219		1	9	P35244	RFA3_HUMAN	Replication protein A 14 kDa subunit		Ace|R<C13N15>(1), Ace|R(1)	44	604.255	2
	M	V	D	NatA	9	Ace(9)	Ace	VDMMD	VDMMDLPR	R	93	100	7	√					1	0	-0.131936		2	9	P35244	RFA3_HUMAN	Replication protein A 14 kDa subunit		Ace|R<C13N15>(5), Ace|R(4)	48	525.733	2
	M	V	E	NatA	4	AcD3C13(4)	AcD3C13	VEKGP	VEKGPEVSGKR	R	N.D.	N.D.	N.D.						N.D.				2	12	Q9UKL0	RCOR1_HUMAN	REST corepressor 1		AcD3C13|R(2), AcD3C13|R<C13N15>(2)	56	663.887	2
	-	M	E	NatB	1	Ace(1)	Ace	MEDLD	MEDLDQSPLVSSSDSPPR	R	100	100	0						2.07933	1.05612	2.46557		1	18	Q9NQC3	RTN4_HUMAN	Reticulon-4		Ace|R(1)	102	1009.45	2
	R	M	K	other	2	AcD3C13(1), Ace(1)	AcD3C13	MKQLA	MKQLANQTVGR	R	35.009	37.2369	2.22792						1.06582	0.0919702	0.0942626		8	18	Q68EM7	RHG17_HUMAN	Rho GTPase-activating protein 17		AcD3C13|R(1), Ace|R(1)	61	678.374	2
	M	A	T	NatA	1	Ace(1)	Ace	ATEAQ	ATEAQSEGEVPAR	R<C13N15>	88	100	12	√					1.26426	0.338295	0.700092		2	14	Q14CB8	RHG19_HUMAN	Rho GTPase-activating protein 19		Ace|R<C13N15>(1)	38	698.831	2
	-	M	E	NatB	1	Ace(1)	Ace	MEENN	MEENNDSTENPQQGQGR	R	100	100	0						2.21223	1.1455	2.6854	99% siNatA	1	17	Q8N264	RHG24_HUMAN	Rho GTPase-activating protein 24		Ace|R(1)	29	996.405	2
	M	S	Q	NatA	1	Ace(1)	Ace	SQTQD	SQTQDYECR	R	100	100	0						1.28215	0.358565	0.749947		2	10	Q9C0H5	RHG39_HUMAN	Rho GTPase-activating protein 39		Ace|R(1)	26	614.748	2
	-	M	K	other	4	Ace(4)	Ace	MKKQF	MKKQFNR	R<C13N15>	100	100	0						1.00835	0.0120036	-0.102413		1	7	Q17R89	RHG44_HUMAN	Rho GTPase-activating protein 44	Q68EM7 (1-7)	Ace|R(2), Ace|R<C13N15>(2)	49	557.306	2
	-	M	E	NatB	4	Ace(4)	Ace	MEDFA	MEDFAR	R	100	100	0						0.965585	-0.0505248	-0.256201		1	6	Q92888	ARHG1_HUMAN	Rho guanine nucleotide exchange factor 1		Ace|R(2), Ace|R<C13N15>(2)	47	413.674	2
	M	S	T	NatA	3	Ace(3)	Ace	STGDS	STGDSFETR	R	100	100	0						1.13723	0.185528	0.324367		2	10	Q13464	ROCK1_HUMAN	Rho-associated protein kinase 1		Ace|R(2), Ace|R<C13N15>(1)	53	521.228	2
	M	T	D	NatA	1	Ace(1)	Ace	TDALL	TDALLPAAPQPLEKENDGYFR	R	100	100	0						0.83577	-0.258822	-0.768504		2	22	Q8IUC4	RHPN2_HUMAN	Rhophilin-2		Ace|R(1)	47	812.08	3
	-	M	D	NatB	1	Ace(1)	Ace	MDAPG	MDAPGALAQTAAPGPGR	R	100	100	0						1.31046	0.390073	0.827441		1	17	Q9HBH0	RHOF_HUMAN	Rho-related GTP-binding protein RhoF		Ace|R(1)	37	819.9	2
	-	M	D	NatB	2	Ace(2)	Ace	MDLSE	MDLSELER	R<C13N15>	100	100	0						0.82725	-0.273605	-0.804861		1	8	O75792	RNH2A_HUMAN	Ribonuclease H2 subunit A		Ace|R(1), Ace|R<C13N15>(1)	68	530.746	2
	M	A	A	NatA	2	Ace(2)	Ace	AAGVD	AAGVDCGDGVGAR	R<C13N15>	≥93	≥98	N.D.						0.71854	-0.47686	-1.30476		2	14	Q5TBB1	RNH2B_HUMAN	Ribonuclease H2 subunit B		Ace|R<C13N15>(1), Ace|R(1)	84	628.782	2
	-	M	E	NatB	6	Ace(6)	Ace	MESGD	MESGDEAAIER	R<C13N15>	100	100	0						0.752313	-0.410594	-1.14178		1	11	Q8TDP1	RNH2C_HUMAN	Ribonuclease H2 subunit C		Ace|R(3), Ace|R<C13N15>(3)	86	638.274	2
	M	S	L	NatA	5	Ace(5)	Ace	SLDIQ	SLDIQSLDIQCEELSDAR	R	100	100	0						0.9683	-0.046474	-0.246238		2	19	P13489	RINI_HUMAN	Ribonuclease inhibitor		Ace|R(3), Ace|R<C13N15>(2)	132	1067.5	2
	M	P	A	none	4	AcD3C13(4)	AcD3C13	PAPAA	PAPAATYER	R<C13N15>	0	0	0						1.11936	0.162668	0.268142		2	10	O95059	RPP14_HUMAN	Ribonuclease P protein subunit p14		AcD3C13|R<C13N15>(2), AcD3C13|R(2)	70	516.77	2
	M	A	G	NatA	2	Ace(2)	Ace	AGPVK	AGPVKDR	R<C13N15>	91.4198	100	8.58018	√					0.994472	-0.00799682	-0.151604		2	8	Q9H633	RPP21_HUMAN	Ribonuclease P protein subunit p21		Ace|R<C13N15>(1), Ace|R(1)	54	421.241	2
	M	A	V	NatA	4	AcD3C13(1), Ace(3)	Ace	AVFAD	AVFADLDLR	R	64	98	34	√	√	√	√		1.15113	0.203049	0.367458		2	10	P78346	RPP30_HUMAN	Ribonuclease P protein subunit p30		AcD3C13|R(1), Ace|R<C13N15>(2), Ace|R(1)	84	531.285	2
	M	A	A	NatA	1	Ace(1)	Ace	AAAPQ	AAAPQAPGR	R<C13N15>	100	100	0						0.88659	-0.173661	-0.559052		2	10	P78345	RPP38_HUMAN	Ribonuclease P protein subunit p38		Ace|R<C13N15>(1)	36	445.74	2
	M	A	A	NatA	3	Ace(3)	Ace	AAAAG	AAAAGDGGGEGGAGLGSAAGLGPGPGLR	R	72	100	28	√					1.3349	0.416732	0.893007		2	29	Q9HCJ3	RAVR2_HUMAN	Ribonucleoprotein PTB-binding 2		Ace|R(2), Ace|R<C13N15>(1)	112	1132.06	2
	-	M	E	NatB	2	Ace(2)	Ace	MEDSA	MEDSASASLSSAAATGTSTSTPAAPTAR	R	100	100	0						0.85511	-0.225818	-0.687331		1	28	O76021	RL1D1_HUMAN	Ribosomal L1 domain-containing protein 1		Ace|R(2)	45	885.74	3
	M	A	P	none	2	AcD3C13(2)	AcD3C13	APAMQ	APAMQPAEIQFAQR	R	0	0	0						1.00367	0.005285	-0.118938		2	15	Q14684	RRP1B_HUMAN	Ribosomal RNA processing protein 1 homolog B		AcD3C13|R<C13N15>(1), AcD3C13|R(1)	58	810.912	2
	M	A	A	NatA	3	Ace(3)	Ace	AAPSD	AAPSDGFKPR	R	92.2269	100	7.77311	√					0.790698	-0.338802	-0.965212		2	11	Q92979	NEP1_HUMAN	Ribosomal RNA small subunit methyltransferase NEP1		Ace|R<C13N15>(2), Ace|R(1)	70	567.798	2
	-	M	E	NatB	1	Ace(1)	Ace	MEGQS	MEGQSVEELLAKAEQDEAEKLQR	R	100	100	0						0.87389	-0.194476	-0.610247		1	23	Q15050	RRS1_HUMAN	Ribosome biogenesis regulatory protein homolog		Ace|R(1)	49	928.463	3
	M	S	I	NatA	6	Ace(6)	Ace	SIFTP	SIFTPTNQIR	R	100	100	0						0.574795	-0.798881	-2.09677		2	11	Q9Y3A5	SBDS_HUMAN	Ribosome maturation protein SBDS		Ace|R<C13N15>(3), Ace|R(3)	75	609.829	2
	-	M	D	NatB	1	Ace(1)	Ace	MDTLD	MDTLDR	R<C13N15>	100	100	0						0.82757	-0.273047	-0.803489		1	6	Q9H7B2	RPF2_HUMAN	Ribosome production factor 2 homolog		Ace|R<C13N15>(1)	35	409.683	2
	M	A	S	NatA	2	Ace(2)	Ace	ASGCK	ASGCKIGPSILNSDLANLGAECLR	R<C13N15>	100	100	0						1.00633	0.00910348	-0.109546		2	25	Q96AT9	RPE_HUMAN	Ribulose-phosphate 3-epimerase		Ace|R<C13N15>(2)	70	1308.16	2
	-	M	N	NatB or other	2	Ace(2)	Ace	MNLDG	MNLDGSAQDPEKR	R	100	100	0						1.08109	0.112487	0.144722		1	13	Q8TAC1	RFESD_HUMAN	Rieske domain-containing protein		Ace|R(1), Ace|R<C13N15>(1)	67	783.365	2
	M	A	A	NatA	4	Ace(4)	Ace	AALKE	AALKEDR	R	100	100	0						0.916953	-0.12508	-0.439567		2	8	P55199	ELL_HUMAN	RNA polymerase II elongation factor ELL		Ace|R<C13N15>(3), Ace|R(1)	53	446.248	2
	-	M	E	NatB	1	Ace(1)	Ace	MEELQ	MEELQEPLR	R	100	100	0						1.31455	0.394569	0.838498		1	9	Q9HB65	ELL3_HUMAN	RNA polymerase II elongation factor ELL3		Ace|R(1)	49	601.79	2
	-	M	E	NatB	1	Ace(1)	Ace	MEVPA	MEVPAAGR	R	100	100	0						1.22761	0.295855	0.595712		1	8	Q9Y5B0	CTDP1_HUMAN	RNA polymerase II subunit A C-terminal domain phosphatase		Ace|R(1)	48	444.716	2
	M	A	P	none	2	AcD3C13(2)	AcD3C13	APTIQ	APTIQTQAQR	R	0	0	0						0.67181	-0.573875	-1.54337		2	11	Q8N7H5	PAF1_HUMAN	RNA polymerase II-associated factor 1 homolog		AcD3C13|R<C13N15>(1), AcD3C13|R(1)	77	580.822	2
	-	M	E	NatB	3	Ace(3)	Ace	MEPGS	MEPGSVENLSIVYR	R	100	100	0						1.00137	0.00197514	-0.127078		1	14	Q9UJJ7	RUSD1_HUMAN	RNA pseudouridylate synthase domain-containing protein 1		Ace|R<C13N15>(2), Ace|R(1)	74	826.404	2
	-	M	N	NatB or other	1	Ace(1)	Ace	MNPLT	MNPLTKVKLINELNER	R<C13N15>	100	100	0						1.27589	0.351504	0.73258		1	16	Q9Y388	RBMX2_HUMAN	RNA-binding motif protein, X-linked 2		Ace|R<C13N15>(1)	35	692.056	3
	-	M	L	NatC or other	4	Ace(4)	Ace	MLLSV	MLLSVTSR	R<C13N15>	100	100	0						1.01438	0.0205982	-0.0812753		1	8	Q15434	RBMS2_HUMAN	RNA-binding motif, single-stranded-interacting protein 2		Ace|R(2), Ace|R<C13N15>(2)	59	487.764	2
	M	A	A	NatA	3	Ace(3)	Ace	AAALG	AAALGASGGAGAGDDDFDQFDKPGAER	R	96	100	4						0.809565	-0.304781	-0.881538		2	28	Q96EV2	RBM33_HUMAN	RNA-binding protein 33		Ace|R(3)	109	885.735	3
	M	A	L	NatA	4	Ace(3), AcD3C13(1)	Ace	ALEGM	ALEGMSKR	R<C13N15>	57	97	40	√					1.16327	0.218191	0.4047		2	9	P42696	RBM34_HUMAN	RNA-binding protein 34		Ace|R(2), AcD3C13|R(1), Ace|R<C13N15>(1)	45	503.764	2
	M	A	G	NatA	1	Ace(1)	Ace	AGAGP	AGAGPAPGLPGAGGPVVPGPGAGIPGKSGEER	R	91	100	9	√					0.794933	-0.331095	-0.946258		2	33	Q9BTD8	RBM42_HUMAN	RNA-binding protein 42		Ace|R(1)	80	941.83	3
	M	A	S	NatA	1	Ace(1)	Ace	ASVLN	ASVLNVKESKAPER	R	100	100	0						1.13386	0.181243	0.313826		2	15	Q6ZSC3	RBM43_HUMAN	RNA-binding protein 43		Ace|R(1)	47	832.47	2
	M	V	K	NatA	2	AcD3C13(2)	AcD3C13	VKLFI	VKLFIGNLPR	R	0	0	0						1.20796	0.272573	0.538451		2	11	Q9BQ04	RBM4B_HUMAN	RNA-binding protein 4B	Q9BWF3 (2-11)	AcD3C13|R(1), AcD3C13|R<C13N15>(1)	75	625.9	2
	M	S	L	NatA	3	Ace(3)	Ace	SLKLQ	SLKLQASNVTNKNDPKSINSR	R	100	100	0						1.23328	0.3025	0.612057		2	22	Q9UKM9	RALY_HUMAN	RNA-binding protein Raly		Ace|R(3)	64	833.127	3
	-	M	N	NatB or other	1	Ace(1)	Ace	MNNGG	MNNGGKAEKENTPSEANLQEEEVR	R	100	100	0						1.71114	0.774958	1.77406		1	24	Q93062	RBPMS_HUMAN	RNA-binding protein with multiple splicing		Ace|R(1)	50	942.777	3
	M	T	D	NatA	8	Ace(8)	Ace	TDTAE	TDTAEAVPKFEEMFASR	R<C13N15>	100	100	0						0.864293	-0.210408	-0.649431		2	18	Q9BTL3	RAM_HUMAN	RNMT-activating mini protein		Ace|R(4), Ace|R<C13N15>(4)	91	1022.48	2
	M	G	K	NatA	4	AcD3C13(4)	AcD3C13	GKQKK	GKQKKTR	R	0	0	0						1.00471	0.00677914	-0.115263		2	8	Q9Y324	FCF1_HUMAN	rRNA-processing protein FCF1 homolog		AcD3C13|R(2), AcD3C13|R<C13N15>(2)	44	517.341	2
	-	M	K	other	17	AcD3C13(17)	AcD3C13	MKIEE	MKIEEVKSTTKTQR	R	6	5	-1						1.01016	0.014591	-0.09605		1	14	Q9Y265	RUVB1_HUMAN	RuvB-like 1		AcD3C13|R(10), AcD3C13|R<C13N15>(7)	89	942.031	2
	M	A	T	NatA	7	Ace(7)	Ace	ATVTA	ATVTATTKVPEIR	R<C13N15>	100	100	0						0.99317	-0.00988741	-0.156254		2	14	Q9Y230	RUVB2_HUMAN	RuvB-like 2		Ace|R<C13N15>(4), Ace|R(3)	91	743.429	2
	-	M	T	other	3	Ace(2), AcD3C13(1)	Ace	MTDYG	MTDYGEEQR	R<C13N15>	87	97	10	√					0.686143	-0.543419	-1.46846		1	9	Q9H446	RWDD1_HUMAN	RWD domain-containing protein 1		Ace|R<C13N15>(1), Ace|R(1), AcD3C13|R(1)	77	598.742	2
	M	T	D	NatA	2	Ace(2)	Ace	TDYGE	TDYGEEQR	R	95	100	5	√					1.08754	0.121074	0.165844		2	9	Q9H446	RWDD1_HUMAN	RWD domain-containing protein 1		Ace|R<C13N15>(1), Ace|R(1)	58	520.22	2
	M	S	A	NatA	4	Ace(4)	Ace	SANED	SANEDQEMELEALR	R	100	100	0						0.93777	-0.092694	-0.359915		2	15	Q6NW29	RWDD4_HUMAN	RWD domain-containing protein 4		Ace|R<C13N15>(2), Ace|R(2)	104	846.873	2
	M	A	A	NatA	2	Ace(2)	Ace	AAATG	AAATGAVAASAASGQAEGKKITDLR	R<C13N15>	90	100	10	√					0.899864	-0.152221	-0.50632		2	26	Q9NWH9	SLTM_HUMAN	SAFB-like transcription modulator		Ace|R(1), Ace|R<C13N15>(1)	86	1231.17	2
	M	A	E	NatA	3	Ace(3)	Ace	AETLS	AETLSGLGDSGAAGAAALSSASSETGTR	R	100	100	0						1.22766	0.295915	0.59586		2	29	Q15424	SAFB1_HUMAN	Scaffold attachment factor B1		Ace|R(3)	142	1269.1	2
	M	A	E	NatA	2	Ace(2)	Ace	AETLP	AETLPGSGDSGPGTASLGPGVAETGTR	R	100	100	0						1.27822	0.354131	0.73904		2	28	Q14151	SAFB2_HUMAN	Scaffold attachment factor B2		Ace|R(2)	97	1242.6	2
	M	A	A	NatA	3	Ace(3)	Ace	AAAAA	AAAAAATAAAAASIR	R<C13N15>	100	100	0						0.78847	-0.342872	-0.975223		2	16	Q8WVM8	SCFD1_HUMAN	Sec1 family domain-containing protein 1		Ace|R<C13N15>(1), Ace|R(2)	108	655.359	2
	M	V	Q	NatA	1	AcD3C13(1)	AcD3C13	VQKYQ	VQKYQSPVR	R	N.D.	N.D.	N.D.						N.D.				2	10	Q92503	S14L1_HUMAN	SEC14-like protein 1		AcD3C13|R(1)	42	599.847	2
	M	A	A	NatA	6	Ace(6)	Ace	AAAPP	AAAPPSYCFVAFPPR	R	100	100	0						1.05268	0.0740615	0.0502165		2	16	Q12765	SCRN1_HUMAN	Secernin-1		Ace|R(4), Ace|R<C13N15>(2)	40	846.914	2
	M	S	D	NatA	1	Ace(1)	Ace	SDFDS	SDFDSNPFADPDLNNPFKDPSVTQVTR	R	100	100	0						1.16769	0.223657	0.418144		2	28	O15126	SCAM1_HUMAN	Secretory carrier-associated membrane protein 1		Ace|R(1)	70	1038.15	3
	M	A	T	NatA	2	Ace(2)	Ace	ATLIY	ATLIYVDKENGEPGTR	R	100	100	0						1.36665	0.450644	0.976413		2	17	O95997	PTTG1_HUMAN	Securin		Ace|R(1), Ace|R<C13N15>(1)	98	926.476	2
	M	A	E	NatA	2	Ace(2)	Ace	AEASA	AEASATGACGEAMAAAEGSSGPAGLTLGR	R	100	100	0						0.71137	-0.491328	-1.34035		2	30	Q99611	SPS2_HUMAN	Selenide, water dikinase 2		Ace|R(1), Ace|R<C13N15>(1)	65	893.738	3
	-	M	E	NatB	2	Ace(2)	Ace	MEAAV	MEAAVAPGR	R	100	100	0						0.85262	-0.230025	-0.697678		1	9	Q96I15	SCLY_HUMAN	Selenocysteine lyase		Ace|R(1), Ace|R<C13N15>(1)	59	480.234	2
	M	A	A	NatA	2	Ace(2)	Ace	AAGKS	AAGKSGGSAGEITFLEALAR	R	100	100	0						1.13464	0.182235	0.316266		2	21	Q9GZR1	SENP6_HUMAN	Sentrin-specific protease 6		Ace|R<C13N15>(1), Ace|R(1)	50	666.022	3
	-	M	E	NatB	3	Ace(3)	Ace	MEGGL	MEGGLGR	R	100	100	0						1.35412	0.437356	0.943731		1	7	P35270	SPRE_HUMAN	Sepiapterin reductase		Ace|R(1), Ace|R<C13N15>(2)	51	389.182	2
	M	A	S	NatA	2	Ace(2)	Ace	ASSEV	ASSEVAR	R<C13N15>	100	100	0						0.79323	-0.334189	-0.953867		2	8	Q9P0V9	SEP10_HUMAN	Septin-10		Ace|R(1), Ace|R<C13N15>(1)	59	386.197	2
	M	A	A	NatA	2	Ace(2)	Ace	AATDL	AATDLER	R	92.2256	100	7.77439	√					1.20367	0.26744	0.525826		2	8	Q92599	SEPT8_HUMAN	Septin-8		Ace|R(1), Ace|R<C13N15>(1)	43	409.206	2
	-	M	K	other	11	Ace(11)	Ace	MKKSY	MKKSYSGGTR	R<C13N15>	100	100	0						1.06532	0.0912835	0.0925736		1	10	Q9UHD8	SEPT9_HUMAN	Septin-9		Ace|R<C13N15>(4), Ace|R(7)	66	638.83	2
	R	M	E	NatB	2	Ace(2)	Ace	MEPPA	MEPPASKVPEVPTAPATDAAPKR	R	86	91	5						1.34021	0.422459	0.907093		165	187	Q9UHD8	SEPT9_HUMAN	Septin-9		Ace|R(1), Ace|R<C13N15>(1)	49	838.107	3
	M	A	S	NatA	2	Ace(2)	Ace	ASLTV	ASLTVKAYLLGKEDAAR	R<C13N15>	100	100	0						0.65655	-0.607023	-1.6249		2	18	Q13501	SQSTM_HUMAN	Sequestosome-1		Ace|R<C13N15>(1), Ace|R(1)	47	976.556	2
	-	M	D	NatB	4	Ace(4)	Ace	MDAGF	MDAGFFR	R<C13N15>	100	100	0						1.21638	0.282594	0.563098		1	7	Q8IYB3	SRRM1_HUMAN	Serine/arginine repetitive matrix protein 1		Ace|R(2), Ace|R<C13N15>(2)	63	456.201	2
	-	M	Y	NatC or other	4	Ace(4)	Ace	MYNGI	MYNGIGLPTPR	R<C13N15>	100	100	0						1.19169	0.253003	0.490319		1	11	Q9UQ35	SRRM2_HUMAN	Serine/arginine repetitive matrix protein 2		Ace|R(2), Ace|R<C13N15>(2)	58	643.826	2
	M	A	F	NatA	2	Ace(2)	Ace	AFANF	AFANFR	R<C13N15>	100	100	0						0.95044	-0.0733325	-0.312296		2	7	O94804	STK10_HUMAN	Serine/threonine-protein kinase 10		Ace|R<C13N15>(1), Ace|R(1)	47	389.2	2
	-	M	I	NatC or other	3	AcD3C13(3)	AcD3C13	MIPLE	MIPLEKPGSGGSSPGATSGSGR	R<C13N15>	18	20	2						1.53192	0.615341	1.38148		1	22	Q9UEE5	ST17A_HUMAN	Serine/threonine-protein kinase 17A		AcD3C13|R<C13N15>(1), AcD3C13|R(2)	46	717.363	3
	-	M	E	NatB	2	Ace(2)	Ace	METVQ	METVQLR	R	100	100	0						1.06648	0.0928569	0.0964435		1	7	Q13043	STK4_HUMAN	Serine/threonine-protein kinase 4		Ace|R<C13N15>(1), Ace|R(1)	63	467.737	2
	-	M	D	NatB	2	Ace(2)	Ace	MDPTA	MDPTAGSKKEPGGGAATEEGVNR	R	100	100	0						1.40972	0.495404	1.0865		1	23	Q96GX5	GWL_HUMAN	Serine/threonine-protein kinase greatwall		Ace|R(2)	88	1206.08	2
	M	A	S	NatA	6	Ace(6)	Ace	ASDAV	ASDAVQSEPR	R	100	100	0						0.978097	-0.031951	-0.210519		2	11	Q16512	PKN1_HUMAN	Serine/threonine-protein kinase N1		Ace|R(3), Ace|R<C13N15>(3)	82	551.263	2
	M	S	V	NatA	4	Ace(4)	Ace	SVLGE	SVLGEYER	R<C13N15>	100	100	0						0.78134	-0.355978	-1.00746		2	9	Q8TD19	NEK9_HUMAN	Serine/threonine-protein kinase Nek9		Ace|R<C13N15>(2), Ace|R(2)	68	502.75	2
	M	S	N	NatA	5	Ace(5)	Ace	SNNGL	SNNGLDIQDKPPAPPMR	R	100	100	0						1.00328	0.0047243	-0.120317		2	18	Q13153	PAK1_HUMAN	Serine/threonine-protein kinase PAK 1		Ace|R<C13N15>(3), Ace|R(2)	48	977.986	2
	M	S	D	NatA	17	Ace(17)	Ace	SDNGE	SDNGELEDKPPAPPVR	R<C13N15>	100	100	0						1.04725	0.0665994	0.0318637		2	17	Q13177	PAK2_HUMAN	Serine/threonine-protein kinase PAK 2		Ace|R<C13N15>(8), Ace|R(9)	72	607.307	3
	M	S	A	NatA	5	Ace(5)	Ace	SAAVT	SAAVTAGKLAR	R	100	100	0						1.73933	0.79853	1.83203		2	12	P53350	PLK1_HUMAN	Serine/threonine-protein kinase PLK1		Ace|R(3), Ace|R<C13N15>(2)	65	567.335	2
	M	A	A	NatA	8	Ace(8)	Ace	AAAET	AAAETQSLR	R	94.9017	100	5.09834	√				(√)	0.880168	-0.184149	-0.584847		2	10	Q13523	PRP4B_HUMAN	Serine/threonine-protein kinase PRP4 homolog		Ace|R(4), Ace|R<C13N15>(4)	82	494.757	2
	M	G	K	NatA	2	AcD3C13(2)	AcD3C13	GKVNV	GKVNVAKLR	R	0	0	0						0.89082	-0.166794	-0.542163		2	10	Q9BVS4	RIOK2_HUMAN	Serine/threonine-protein kinase RIO2		AcD3C13|R<C13N15>(1), AcD3C13|R(1)	55	563.373	2
	M	S	S	NatA	1	Ace(1)	Ace	SSSSP	SSSSPPAGAASAAISASEKVDGFTR	R	100	100	0						1.31418	0.394163	0.837499		2	26	Q15172	2A5A_HUMAN	Serine/threonine-protein phosphatase 2A 56 kDa regulatory subunit alpha isoform		Ace|R(1)	77	1220.6	2
	M	S	S	NatA	2	Ace(2)	Ace	SSAPT	SSAPTTPPSVDKVDGFSR	R	99.7137	99.9871	0.273407						1.13978	0.188755	0.332304		2	19	Q16537	2A5E_HUMAN	Serine/threonine-protein phosphatase 2A 56 kDa regulatory subunit epsilon isoform		Ace|R<C13N15>(1), Ace|R(1)	67	968.984	2
	-	M	L	NatC or other	4	Ace(4)	Ace	MLTCN	MLTCNKAGSR	R	100	100	0						1.23676	0.306566	0.622055		1	10	Q13362	2A5G_HUMAN	Serine/threonine-protein phosphatase 2A 56 kDa regulatory subunit gamma isoform		Ace|R(2), Ace|R<C13N15>(2)	77	621.8	2
	M	A	A	NatA	7	Ace(7)	Ace	AAADG	AAADGDDSLYPIAVLIDELR	R	95.1285	100	4.8715	√					1.15354	0.206068	0.374883		2	21	P30153	2AAA_HUMAN	Serine/threonine-protein phosphatase 2A 65 kDa regulatory subunit A alpha isoform		Ace|R(4), Ace|R<C13N15>(3)	95	1080.05	2
	M	S	E	NatA	2	Ace(2)	Ace	SEPKA	SEPKAIDPKLSTTDR	R	100	100	0						0.91455	-0.128866	-0.448879		2	16	Q08209	PP2BA_HUMAN	Serine/threonine-protein phosphatase 2B catalytic subunit alpha isoform		Ace|R<C13N15>(1), Ace|R(1)	73	897.484	2
	M	A	A	NatA	2	Ace(2)	Ace	AAPEP	AAPEPAR	R	96	100	4						0.81637	-0.292705	-0.851838		2	8	P16298	PP2BB_HUMAN	Serine/threonine-protein phosphatase 2B catalytic subunit beta isoform		Ace|R<C13N15>(1), Ace|R(1)	41	377.198	2
	M	A	E	NatA	2	Ace(2)	Ace	AEISD	AEISDLDR	R	100	100	0						0.88016	-0.184162	-0.584879		2	9	P60510	PP4C_HUMAN	Serine/threonine-protein phosphatase 4 catalytic subunit		Ace|R(1), Ace|R<C13N15>(1)	64	480.735	2
	-	M	A	other	2	Ace(2)	Ace	MAPLD	MAPLDLDKYVEIAR	R<C13N15>	100	N.D.	N.D.						N.D.				1	14	O00743	PPP6_HUMAN	Serine/threonine-protein phosphatase 6 catalytic subunit		Ace|R(1), Ace|R<C13N15>(1)	76	874.96	2
	M	A	P	none	6	AcD3C13(6)	AcD3C13	APLDL	APLDLDKYVEIAR	R	0	0	0						0.87582	-0.191294	-0.602419		2	14	O00743	PPP6_HUMAN	Serine/threonine-protein phosphatase 6 catalytic subunit		AcD3C13|R(3), AcD3C13|R<C13N15>(3)	81	798.951	2
	M	A	F	NatA	3	Ace(3)	Ace	AFLKL	AFLKLR	R<C13N15>	93	100	7	√					1.10033	0.13794	0.207324		2	7	O15084	CAC1A_HUMAN	Serine/threonine-protein phosphatase 6 regulatory ankyrin repeat subunit A	O00555 (375-380), Q00975 (371-376)	Ace|R(2), Ace|R<C13N15>(1)	42	423.775	2
	M	S	D	NatA	4	Ace(4)	Ace	SDSEK	SDSEKLNLDSIIGR	R	100	100	0						0.962255	-0.0555088	-0.268459		2	15	P62136	PP1A_HUMAN	Serine/threonine-protein phosphatase PP1-alpha catalytic subunit		Ace|R<C13N15>(2), Ace|R(2)	98	818.431	2
	M	A	D	NatA	6	Ace(6)	Ace	ADGEL	ADGELNVDSLITR	R<C13N15>	100	100	0						0.93061	-0.103751	-0.387111		2	14	P62140	PP1B_HUMAN	Serine/threonine-protein phosphatase PP1-beta catalytic subunit		Ace|R(4), Ace|R<C13N15>(2)	104	727.872	2
	M	A	D	NatA	19	Ace(19)	Ace	ADLDK	ADLDKLNIDSIIQR	R	100	100	0						1.08551	0.118372	0.159196		2	15	P36873	PP1G_HUMAN	Serine/threonine-protein phosphatase PP1-gamma catalytic subunit		Ace|R<C13N15>(7), Ace|R(12)	97	851.971	2
	-	M	V	other	7	Ace(4), AcD3C13(3)	AcD3C13	MVLDL	MVLDLDLFR	R<C13N15>	52	72	20	√					4.40893	2.14043	5.1324	99% siNatA	1	9	P49591	SYSC_HUMAN	Serine--tRNA ligase, cytoplasmic		Ace|R<C13N15>(3), Ace|R(1), AcD3C13|R<C13N15>(2), AcD3C13|R(1)	82	597.825	2
	M	V	L	NatA	6	AcD3C13(6)	AcD3C13	VLDLD	VLDLDLFR	R	0	0	0						0.837978	-0.255016	-0.759142		2	9	P49591	SYSC_HUMAN	Serine--tRNA ligase, cytoplasmic		AcD3C13|R<C13N15>(4), AcD3C13|R(2)	75	519.303	2
	-	M	D	NatB	2	Ace(2)	Ace	MDSLG	MDSLGAVSTR	R<C13N15>	100	100	0						0.74519	-0.42432	-1.17554		1	10	Q9UIV8	SPB13_HUMAN	Serpin B13		Ace|R<C13N15>(1), Ace|R(1)	59	552.765	2
	-	M	E	NatB	2	Ace(2)	Ace	METLS	METLSNASGTFAIR	R<C13N15>	100	100	0						0.98526	-0.0214236	-0.184627		1	14	P50453	SPB9_HUMAN	Serpin B9		Ace|R(1), Ace|R<C13N15>(1)	83	783.379	2
	-	M	L	NatC or other	2	AcD3C13(1), Ace(1)	AcD3C13	MLSKG	MLSKGLKR	R	39.083	31	-8.08297						N.D.				1	8	Q9UHV2	SRTD1_HUMAN	SERTA domain-containing protein 1		AcD3C13|R(1), Ace|R(1)	56	545.341	2
	M	A	Q	NatA	4	Ace(3), AcD3C13(1)	AcD3C13	AQPGT	AQPGTLNLNNEVVKMR	R	51.4208	100	48.5792	√	√				0.72451	-0.464923	-1.2754		2	17	Q8NEF9	SRFB1_HUMAN	Serum response factor-binding protein 1		Ace|R<C13N15>(2), AcD3C13|R(1), Ace|R(1)	72	947.512	2
	-	M	K	other	2	AcD3C13(2)	AcD3C13	MKLNE	MKLNER	R	0	0	0						1.30896	0.388419	0.823372		1	6	Q6ICB4	SESQ2_HUMAN	Sesquipedalian-2	Q8N4B1 (1-6)	AcD3C13|R(1), AcD3C13|R<C13N15>(1)	41	450.749	2
	-	M	I	NatC or other	3	Ace(2), AcD3C13(1)	Ace	MIVAD	MIVADSECR	R	92.6966	96	3.30337						0.942675	-0.0851674	-0.341404		1	9	P58004	SESN2_HUMAN	Sestrin-2		Ace|R<C13N15>(1), Ace|R(1), AcD3C13|R(1)	70	569.747	2
	-	M	Q	NatB or other	1	AcD3C13(1)	AcD3C13	MQKGK	MQKGKGR	R	48	45	-3						1.00032	0.000461589	-0.130801		1	7	Q9NVD3	SETD4_HUMAN	SET domain-containing protein 4		AcD3C13|R(1)	33	481.281	2
	-	M	Q	NatB or other	2	Ace(2)	Ace	MQKAG	MQKAGAGGR	R	100	100	0						N.D.				1	9	Q6ZV89	SH2D5_HUMAN	SH2 domain-containing protein 5		Ace|R<C13N15>(1), Ace|R(1)	64	490.75	2
	-	M	E	NatB	2	Ace(2)	Ace	MENLP	MENLPAVTTEEPTPMGR	R<C13N15>	100	100	0						0.77819	-0.361806	-1.02179		1	17	Q8TE82	S3TC1_HUMAN	SH3 domain and tetratricopeptide repeat-containing protein 1		Ace|R<C13N15>(1), Ace|R(1)	57	978.95	2
	M	A	D	NatA	4	Ace(4)	Ace	ADGSL	ADGSLTGGGLEAAAMAPER	R	100	100	0						1.0414	0.0585174	0.0119861		2	20	Q8NEM2	SHCBP_HUMAN	SHC SH2 domain-binding protein 1		Ace|R(2), Ace|R<C13N15>(2)	124	916.429	2
	M	A	A	NatA	2	Ace(2)	Ace	AAAPV	AAAPVAAGSGAGR	R	N.D.	N.D.	N.D.						N.D.				2	14	Q8TEL6	TP4AP_HUMAN	Short transient receptor potential channel 4-associated protein		Ace|R(2)	71	549.289	2
	M	P	L	none	3	AcD3C13(3)	AcD3C13	PLELE	PLELELCPGR	R<C13N15>	0	0	0						0.90006	-0.151907	-0.505548		2	11	Q9NR45	SIAS_HUMAN	Sialic acid synthase		AcD3C13|R<C13N15>(2), AcD3C13|R(1)	63	620.833	2
	-	M	L	NatC or other	2	AcD3C13(2)	AcD3C13	MLSLD	MLSLDFLDDVR	R	0	0	0						1.3359	0.417812	0.895664		1	11	P67812	SC11A_HUMAN	Signal peptidase complex catalytic subunit SEC11A		AcD3C13|R(1), AcD3C13|R<C13N15>(1)	45	693.85	2
	M	A	A	NatA	2	Ace(2)	Ace	AAAAV	AAAAVQGGR	R	86	100	14	√					1.35289	0.436047	0.940513		2	10	Q15005	SPCS2_HUMAN	Signal peptidase complex subunit 2		Ace|R(2)	58	421.728	2
	-	M	N	NatB or other	1	AcD3C13(1)	AcD3C13	MNTVL	MNTVLSR	R	11	8	-3						1.14733	0.19828	0.35573		1	7	P61009	SPCS3_HUMAN	Signal peptidase complex subunit 3		AcD3C13|R(1)	33	442.237	2
	M	V	L	NatA	2	AcD3C13(2)	AcD3C13	VLLES	VLLESEQFLTELTR	R	0	0	0						1.24552	0.316748	0.647099		2	15	P37108	SRP14_HUMAN	Signal recognition particle 14 kDa protein		AcD3C13|R(1), AcD3C13|R<C13N15>(1)	92	862.974	2
	-	M	V	other	2	AcD3C13(2)	AcD3C13	MVLAD	MVLADLGR	R	14	17	3						0.71854	-0.47686	-1.30476		1	8	P61011	SRP54_HUMAN	Signal recognition particle 54 kDa protein		AcD3C13|R<C13N15>(1), AcD3C13|R(1)	66	469.26	2
	M	A	A	NatA	2	AcD3C13(2)	AcD3C13	AAEKQ	AAEKQVPGGGGGGGSGGGGGSGGGGSGGGR	R	19	53	34	√					2.41205	1.27026	2.99224	99% siNatA	2	31	Q9UHB9	SRP68_HUMAN	Signal recognition particle subunit SRP68		AcD3C13|R(2)	156	1169.05	2
	-	M	F	NatC or other	2	Ace(2)	Ace	MFAKG	MFAKGKGSAVPSDGQAR	R	100	100	0						2.53289	1.34079	3.1657	99% siNatA	1	17	Q9BWW4	SSBP3_HUMAN	Single-stranded DNA-binding protein 3		Ace|R(2)	60	929.975	2
	-	M	Y	NatC or other	3	Ace(3)	Ace	MYAKG	MYAKGGKGSAVPSDSQAR	R	100	100	0						1.86292	0.897566	2.07561		1	18	Q9BWG4	SSBP4_HUMAN	Single-stranded DNA-binding protein 4		Ace|R(2), Ace|R<C13N15>(1)	38	981.489	2
	-	M	E	NatB	2	Ace(2)	Ace	MEDVN	MEDVNSNVNADQEVR	R	100	100	0						1.32426	0.405186	0.864611		1	15	Q9P270	SLAI2_HUMAN	SLAIN motif-containing protein 2		Ace|R(1), Ace|R<C13N15>(1)	110	889.387	2
	-	M	K	other	4	AcD3C13(2), Ace(2)	AcD3C13	MKAVK	MKAVKSER	R<C13N15>	69	69	0						1.18996	0.250913	0.485179		1	8	Q8TAD8	SNIP1_HUMAN	Smad nuclear-interacting protein 1		AcD3C13|R(1), Ace|R<C13N15>(1), AcD3C13|R<C13N15>(1), Ace|R(1)	60	558.324	2
	-	M	D	NatB	2	Ace(2)	Ace	MDNKK	MDNKKR	R	89	87	-2						0.943945	-0.0832253	-0.336627		1	6	O43765	SGTA_HUMAN	Small glutamine-rich tetratricopeptide repeat-containing protein alpha		Ace|R(2)	42	472.252	2
	M	S	L	NatA	3	Ace(3)	Ace	SLLNK	SLLNKPKSEMTPEELQKR	R	100	100	0						0.876397	-0.190344	-0.600083		2	19	P62316	SMD2_HUMAN	Small nuclear ribonucleoprotein Sm D2		Ace|R(2), Ace|R<C13N15>(1)	90	1164.13	2
	M	A	D	NatA	2	Ace(2)	Ace	ADEAL	ADEALAGLDEGALR	R	100	100	0						1.14354	0.193507	0.34399		2	15	P53814	SMTN_HUMAN	Smoothelin		Ace|R<C13N15>(1), Ace|R(1)	94	721.86	2
	M	P	G	none	5	AcD3C13(5)	AcD3C13	PGMVL	PGMVLFGR	R	0	0	0						1.12189	0.165931	0.276168		2	9	Q8NCG7	DGLB_HUMAN	Sn1-specific diacylglycerol lipase beta		AcD3C13|R(3), AcD3C13|R<C13N15>(2)	49	470.257	2
	M	A	G	NatA	2	Ace(2)	Ace	AGAGS	AGAGSAAVSGAGTPVAGPTGR	R	94	100	6	√					0.793858	-0.333047	-0.951057		2	22	O95295	SNAPN_HUMAN	SNARE-associated protein Snapin		Ace|R(1), Ace|R<C13N15>(1)	136	877.445	2
	M	A	L	NatA	2	Ace(2)	Ace	ALTSF	ALTSFLPAPTQLSQDQLEAEEKAR	R	87	100	13	√					1.04277	0.0604225	0.0166717		2	25	Q13573	SNW1_HUMAN	SNW domain-containing protein 1		Ace|R<C13N15>(1), Ace|R(1)	103	1366.71	2
	M	A	A	NatA	1	Ace(1)	Ace	AAEID	AAEIDFLR	R	100	100	0						2.0218	1.01564	2.36601		2	9	Q96NL6	SCLT1_HUMAN	Sodium channel and clathrin linker 1		Ace|R(1)	41	488.758	2
	-	M	K	other	8	Ace(8)	Ace	MKKAE	MKKAEMGR	R	100	100	0						0.52436	-0.93137	-2.42262		1	8	Q96QD8	S38A2_HUMAN	Sodium-coupled neutral amino acid transporter 2		Ace|R<C13N15>(4), Ace|R(4)	51	559.785	2
	-	M	E	NatB	8	Ace(8)	Ace	MELQD	MELQDPKMNGALPSDAVGYR	R	100	100	0						1.12112	0.164941	0.273732		1	20	Q8WUX1	S38A5_HUMAN	Sodium-coupled neutral amino acid transporter 5		Ace|R(4), Ace|R<C13N15>(4)	115	1157.05	2
	-	M	E	NatB	2	Ace(2)	Ace	MEPSS	MEPSSKKLTGR	R<C13N15>	100	100	0						0.79529	-0.330447	-0.944664		1	11	P11166	GTR1_HUMAN	Solute carrier family 2, facilitated glucose transporter member 1		Ace|R<C13N15>(1), Ace|R(1)	70	698.378	2
	-	M	E	NatB	2	Ace(2)	Ace	MEADS	MEADSPAGPGAPEPLAEGAAAEFSSLLR	R<C13N15>	100	100	0						0.60806	-0.717714	-1.89714		1	28	Q8IXU6	S35F2_HUMAN	Solute carrier family 35 member F2		Ace|R(1), Ace|R<C13N15>(1)	59	937.113	3
	-	M	Q	NatB or other	2	Ace(1), AcD3C13(1)	Ace	MQGKK	MQGKKPGGSSGGGR	R	78	76	-2						1.25977	0.33316	0.687465		1	14	Q9UIG8	SO3A1_HUMAN	Solute carrier organic anion transporter family member 3A1		Ace|R(1), AcD3C13|R(1)	71	728.369	2
	M	S	D	NatA	3	Ace(3)	Ace	SDTAV	SDTAVADTR	R	100	100	0						1.35714	0.44057	0.951635		2	10	Q9UMY4	SNX12_HUMAN	Sorting nexin-12		Ace|R(2), Ace|R<C13N15>(1)	78	489.231	2
	-	M	E	NatB	4	Ace(4)	Ace	MEVYI	MEVYIPSFR	R<C13N15>	100	100	0						0.747255	-0.420327	-1.16572		1	9	Q9Y343	SNX24_HUMAN	Sorting nexin-24		Ace|R<C13N15>(2), Ace|R(2)	50	605.296	2
	M	A	E	NatA	3	Ace(3)	Ace	AETVA	AETVADTR	R<C13N15>	100	100	0						1.10046	0.138102	0.207724		2	9	O60493	SNX3_HUMAN	Sorting nexin-3		Ace|R(2), Ace|R<C13N15>(1)	61	457.725	2
	-	M	E	NatB	3	Ace(3)	Ace	MEQAP	MEQAPPDPER	R	100	100	0						1.07852	0.109057	0.136288		1	10	O95219	SNX4_HUMAN	Sorting nexin-4		Ace|R(2), Ace|R<C13N15>(1)	35	614.27	2
	M	A	A	NatA	5	Ace(5)	Ace	AAVPE	AAVPELLQQQEEDR	R<C13N15>	100	100	0						0.494013	-1.01738	-2.63416	99% siCTR	2	15	Q9Y5X3	SNX5_HUMAN	Sorting nexin-5		Ace|R<C13N15>(3), Ace|R(2)	90	839.42	2
	-	M	M	other	2	Ace(2)	Ace	MMEGL	MMEGLDDGPDFLSEEDR	R	100	100	0						1.49294	0.578156	1.29003		1	17	Q9UNH7	SNX6_HUMAN	Sorting nexin-6		Ace|R(1), Ace|R<C13N15>(1)	126	1015.4	2
	M	M	E	NatB	2	Ace(2)	Ace	MEGLD	MEGLDDGPDFLSEEDR	R	100	100	0						1.40921	0.494887	1.08523		2	17	Q9UNH7	SNX6_HUMAN	Sorting nexin-6		Ace|R(1), Ace|R<C13N15>(1)	104	941.886	2
	M	A	A	NatA	7	Ace(7)	Ace	AANSS	AANSSGQGFQNKNR	R	100	100	0						1.14603	0.196648	0.351716		2	15	Q9NRY2	SOSSC_HUMAN	SOSS complex subunit C		Ace|R(4), Ace|R<C13N15>(3)	111	784.382	2
	M	A	A	NatA	1	Ace(1)	Ace	AAVDS	AAVDSDVESLPR	R	58	100	42	√					2.36426	1.24139	2.92123	99% siNatA	2	13	Q9H6E5	STPAP_HUMAN	Speckle targeted PIP5K1A-regulated poly(A) polymerase		Ace|R(1)	75	650.823	2
	-	M	D	NatB	9	Ace(9)	Ace	MDPSG	MDPSGVKVLETAEDIQER	R	100	100	0						1.18077	0.239734	0.457685		1	18	Q13813	SPTN1_HUMAN	Spectrin alpha chain, non-erythrocytic 1		Ace|R(5), Ace|R<C13N15>(4)	164	1061.52	2
	M	A	D	NatA	2	Ace(2)	Ace	ADLLG	ADLLGSILSSMEKPPSLGDQETR	R	100	100	0						1.46555	0.551442	1.22432		2	24	O75391	SPAG7_HUMAN	Sperm-associated antigen 7		Ace|R(1), Ace|R<C13N15>(1)	65	850.43	3
	-	M	E	NatB	16	Ace(16)	Ace	MEPGP	MEPGPDGPAASGPAAIR	R	100	100	0						0.908582	-0.138311	-0.472108		1	17	P19623	SPEE_HUMAN	Spermidine synthase		Ace|R(10), Ace|R<C13N15>(6)	92	826.391	2
	-	M	K	other	6	AcD3C13(4), Ace(2)	AcD3C13	MKTPF	MKTPFGKTPGQR	R<C13N15>	17	15	-2						1.12021	0.163776	0.270867		1	12	Q9Y657	SPIN1_HUMAN	Spindlin-1		AcD3C13|R(2), AcD3C13|R<C13N15>(2), Ace|R(2)	65	757.92	2
	-	M	K	other	3	AcD3C13(3)	AcD3C13	MKTPF	MKTPFGKAAAGQR	R<C13N15>	0	0	0						0.99464	-0.00775364	-0.151006		1	13	Q5JUX0	SPIN3_HUMAN	Spindlin-3		AcD3C13|R(2), AcD3C13|R<C13N15>(1)	48	765.426	2
	M	A	T	NatA	7	Ace(7)	Ace	ATGAN	ATGANATPLDFPSKKR	R	90	100	10	√					0.91	-0.136062	-0.466577		2	17	Q15637	SF01_HUMAN	Splicing factor 1		Ace|R<C13N15>(4), Ace|R(3)	88	905.494	2
	-	M	E	NatB	19	Ace(19)	Ace	METIL	METILEQQR	R	100	100	0						0.930274	-0.104272	-0.388391		1	9	Q12874	SF3A3_HUMAN	Splicing factor 3A subunit 3		Ace|R<C13N15>(10), Ace|R(9)	91	603.295	2
	-	M	A	other	1	Ace(1)	Ace	MAAGP	MAAGPISER	R	100	100	0						0.94728	-0.0781372	-0.324113		1	9	Q15427	SF3B4_HUMAN	Splicing factor 3B subunit 4		Ace|R(1)	32	495.24	2
	M	A	A	NatA	7	Ace(5), AcD3C13(2)	Ace	AAGPI	AAGPISER	R<C13N15>	67	100	33	√					0.619238	-0.691433	-1.8325		2	9	Q15427	SF3B4_HUMAN	Splicing factor 3B subunit 4		Ace|R<C13N15>(3), AcD3C13|R(2), Ace|R(2)	59	426.726	2
	M	S	D	NatA	8	Ace(8)	Ace	SDFDE	SDFDEFER	R	100	100	0						0.915816	-0.126871	-0.443972		2	9	P26368	U2AF2_HUMAN	Splicing factor U2AF 65 kDa subunit		Ace|R<C13N15>(4), Ace|R(4)	66	543.722	2
	-	M	Y	NatC or other	2	Ace(2)	Ace	MYGAS	MYGASGGR	R<C13N15>	100	100	0						1.0986	0.135666	0.201732		1	8	Q12872	SFSWA_HUMAN	Splicing factor, suppressor of white-apricot homolog		Ace|R<C13N15>(2)	58	433.689	2
	M	S	E	NatA	1	Ace(1)	Ace	SEETA	SEETATSDNDNSYAR	R	97	100	3						1.9718	0.979513	2.27716		2	16	Q7Z699	SPRE1_HUMAN	Sprouty-related, EVH1 domain-containing protein 1		Ace|R(1)	78	851.346	2
	-	M	D	NatB	3	Ace(3)	Ace	MDDDL	MDDDLMLALR	R	100	100	0						1.04965	0.0699083	0.040002		1	10	Q9H040	SPRTN_HUMAN	SprT-like domain-containing protein Spartan		Ace|R(2), Ace|R<C13N15>(1)	71	633.789	2
	M	A	S	NatA	7	Ace(7)	Ace	ASSAQ	ASSAQSGGSSGGPAVPTVQR	R<C13N15>	100	100	0						0.884204	-0.177548	-0.568613		2	21	Q7KZF4	SND1_HUMAN	Staphylococcal nuclease domain-containing protein 1		Ace|R(3), Ace|R<C13N15>(4)	91	926.955	2
	-	M	F	NatC or other	4	Ace(4)	Ace	MFSQV	MFSQVPR	R	100	100	0						1.04069	0.0575335	0.00956617		1	7	Q9Y3M8	STA13_HUMAN	StAR-related lipid transfer protein 13		Ace|R<C13N15>(2), Ace|R(2)	54	461.726	2
	M	A	S	NatA	29	Ace(29)	Ace	ASSDI	ASSDIQVKELEKR	R	100	100	0						0.93069	-0.103628	-0.386807		2	14	P16949	STMN1_HUMAN	Stathmin		Ace|R(15), Ace|R<C13N15>(14)	88	819.954	2
	M	S	F	NatA	1	Ace(1)	Ace	SFFNF	SFFNFR	R<C13N15>	100	100	0						0.85669	-0.223155	-0.680781		2	7	Q9H2G2	SLK_HUMAN	STE20-like serine/threonine-protein kinase		Ace|R<C13N15>(1)	45	435.212	2
	-	M	V	other	2	Ace(2)	Ace	MVGEE	MVGEEKMSLR	R<C13N15>	98	98	0						0.76173	-0.392648	-1.09765		1	10	P35610	SOAT1_HUMAN	Sterol O-acyltransferase 1		Ace|R(1), Ace|R<C13N15>(1)	69	655.819	2
	M	V	G	NatA	2	AcD3C13(2)	AcD3C13	VGEEK	VGEEKMSLR	R<C13N15>	0	0	0						1.15093	0.2028	0.366846		2	10	P35610	SOAT1_HUMAN	Sterol O-acyltransferase 1		AcD3C13|R(1), AcD3C13|R<C13N15>(1)	49	584.814	2
	-	M	E	NatB	3	Ace(3)	Ace	MEPAV	MEPAVSEPMR	R<C13N15>	100	100	0						1.38697	0.471937	1.02878		1	10	Q15738	NSDHL_HUMAN	Sterol-4-alpha-carboxylate 3-dehydrogenase, decarboxylating		Ace|R(2), Ace|R<C13N15>(1)	78	615.772	2
	M	P	K	none	3	AcD3C13(3)	AcD3C13	PKVVS	PKVVSR	R	0	0	0						1.21171	0.277044	0.549449		2	7	Q9H5V9	CX056_HUMAN	STING ER exit protein	Q7Z6G8 (666-671), Q643R3(144-149)	AcD3C13|R<C13N15>(1), AcD3C13|R(2)	44	390.258	2
	-	M	V	other	1	Ace(1)	Ace	MVAKQ	MVAKQR	R	≥96	≥96	N.D.						2.65084	1.40645	3.3272	99% siNatA	1	6	Q8N6R1	SERP2_HUMAN	Stress-associated endoplasmic reticulum protein 2	Q9Y6X1 (1-6)	Ace|R(1)	33	419.234	2
	-	M	D	NatB	6	Ace(6)	Ace	MDELA	MDELAGGGGGGPGMAAPPR	R<C13N15>	100	100	0						1.17103	0.227778	0.428279		1	19	Q13033	STRN3_HUMAN	Striatin-3		Ace|R(3), Ace|R<C13N15>(3)	109	891.395	2
	-	M	T	other	1	Ace(1)	Ace	MTGKS	MTGKSVKDVDR	R<C13N15>	100	100	0						0.35008	-1.51424	-3.85619	99% siCTR	1	11	Q8WU79	SMAP2_HUMAN	Stromal membrane-associated protein 2		Ace|R<C13N15>(1)	37	699.368	2
	M	T	G	NatA	3	Ace(2), AcD3C13(1)	AcD3C13	TGKSV	TGKSVKDVDR	R	39	64	25	√					1.26053	0.334031	0.689606		2	11	Q8WU79	SMAP2_HUMAN	Stromal membrane-associated protein 2		Ace|R<C13N15>(1), AcD3C13|R(1), Ace|R(1)	62	623.358	2
	M	A	T	NatA	1	Ace(1)	Ace	ATPSK	ATPSKKTSTPSPQPSKR	R	100	100	0						1.26844	0.343055	0.711801		2	18	Q8IY18	SMC5_HUMAN	Structural maintenance of chromosomes protein 5		Ace|R(1)	62	991.054	2
	-	M	V	other	3	Ace(3)	Ace	MVEKE	MVEKEEAGGGISEEEAAQYDR	R	100	100	0		√	√			0.771097	-0.375016	-1.05428		1	21	Q9UBE0	SAE1_HUMAN	SUMO-activating enzyme subunit 1		Ace|R(2), Ace|R<C13N15>(1)	131	1202.03	2
	M	V	E	NatA	12	AcD3C13(11), Ace(1)	AcD3C13	VEKEE	VEKEEAGGGISEEEAAQYDR	R	9	23	14	√	√	√	√		1.06199	0.0867719	0.0814774		2	21	Q9UBE0	SAE1_HUMAN	SUMO-activating enzyme subunit 1		AcD3C13|R(8), Ace|R(1), AcD3C13|R<C13N15>(3)	159	1131.03	2
	M	S	G	NatA	2	Ace(2)	Ace	SGIAL	SGIALSR	R	100	100	0						1.02943	0.0418457	-0.0290174		2	8	P63279	UBC9_HUMAN	SUMO-conjugating enzyme UBC9		Ace|R<C13N15>(1), Ace|R(1)	50	373.214	2
	M	A	G	NatA	2	Ace(2)	Ace	AGAAM	AGAAMAER	R	86	100	14	√					0.938323	-0.0918429	-0.357822		2	9	Q86UD0	SAPC2_HUMAN	Suppressor APC domain-containing protein 2		Ace|R<C13N15>(1), Ace|R(1)	67	417.692	2
	-	M	K	other	1	Ace(1)	Ace	MKKIS	MKKISLKTLR	R	N.D.	N.D.	N.D.						N.D.				1	10	O14544	SOCS6_HUMAN	Suppressor of cytokine signaling 6		Ace|R(1)	35	708.948	2
	M	A	A	NatA	11	Ace(11)	Ace	AAAAA	AAAAAGTATSQR	R<C13N15>	100	100	0						0.980041	-0.029086	-0.203473		2	13	Q9Y2Z0	SUGT1_HUMAN	Suppressor of G2 allele of SKP1 homolog		Ace|R(6), Ace|R<C13N15>(5)	100	564.288	2
	M	S	E	NatA	1	Ace(1)	Ace	SELPG	SELPGDVR	R<C13N15>	100	100	0						0.79909	-0.32357	-0.92775		2	9	Q15527	SURF2_HUMAN	Surfeit locus protein 2		Ace|R<C13N15>(1)	39	462.737	2
	M	G	Q	NatA	5	AcD3C13(5)	AcD3C13	GQNDL	GQNDLMGTAEDFADQFLR	R<C13N15>	0	0	0						1.33578	0.417682	0.895345		2	19	O15260	SURF4_HUMAN	Surfeit locus protein 4		AcD3C13|R(3), AcD3C13|R<C13N15>(2)	101	1050.98	2
	M	A	M	NatA	4	Ace(4)	Ace	AMSSG	AMSSGGSGGGVPEQEDSVLFR	R	100	100	0						0.991505	-0.012308	-0.162208		2	22	Q16637	SMN_HUMAN	Survival motor neuron protein		Ace|R<C13N15>(2), Ace|R(2)	121	1062.98	2
	M	A	A	NatA	2	Ace(2)	Ace	AAAAG	AAAAGGGGPGTAVGATGSGIAAAAAGLAVYR	R	100	100	0						1.05971	0.0836695	0.0738473		2	32	Q92922	SMRC1_HUMAN	SWI/SNF complex subunit SMARCC1		Ace|R(1), Ace|R<C13N15>(1)	63	852.777	3
	-	M	N	NatB or other	4	Ace(4)	Ace	MNLFN	MNLFNLDR	R	100	100	0						0.958135	-0.0616992	-0.283684		1	8	Q9H4L7	SMRCD_HUMAN	SWI/SNF-related matrix-associated actin-dependent regulator of chromatin subfamily A containing DEAD/H box 1		Ace|R<C13N15>(2), Ace|R(2)	68	540.761	2
	M	S	L	NatA	1	Ace(1)	Ace	SLPLT	SLPLTEEQR	R<C13N15>	≥93	≥97	N.D.						N.D.				2	10	Q9NZC9	SMAL1_HUMAN	SWI/SNF-related matrix-associated actin-dependent regulator of chromatin subfamily A-like protein 1		Ace|R<C13N15>(1)	43	562.795	2
	M	A	S	NatA	1	Ace(1)	Ace	ASGSG	ASGSGDSVTR	R<C13N15>	100	100	0						1.12909	0.17516	0.298867		2	11	Q92797	SYMPK_HUMAN	Symplekin		Ace|R<C13N15>(1)	48	494.732	2
	-	M	E	NatB	6	Ace(6)	Ace	MESGA	MESGAYGAAKAGGSFDLR	R	100	100	0						1.25143	0.323572	0.663882		1	18	O43760	SNG2_HUMAN	Synaptogyrin-2		Ace|R(5), Ace|R<C13N15>(1)	115	946.944	2
	M	A	L	NatA	3	Ace(2), AcD3C13(1)	Ace	ALSKG	ALSKGLR	R	81	100	19	√					1.21146	0.276745	0.548712		2	8	O15056	SYNJ2_HUMAN	Synaptojanin-2	Q8IX21 (644-650)	Ace|R<C13N15>(1), Ace|R(1), AcD3C13|R(1)	55	417.263	2
	-	M	D	NatB	2	Ace(2)	Ace	MDNLS	MDNLSSEEIQQR	R	100	100	0						0.82494	-0.277639	-0.814783		1	12	O00161	SNP23_HUMAN	Synaptosomal-associated protein 23		Ace|R<C13N15>(1), Ace|R(1)	94	754.338	2
	M	S	L	NatA	2	Ace(2)	Ace	SLEDP	SLEDPFFVVR	R<C13N15>	100	100	0						1.09964	0.137031	0.205089		2	11	O60499	STX10_HUMAN	Syntaxin-10		Ace|R<C13N15>(1), Ace|R(1)	54	630.829	2
	M	S	Y	NatA	3	Ace(3)	Ace	SYGPL	SYGPLDMYR	R	100	100	0						1.06865	0.0957894	0.103656		2	10	Q86Y82	STX12_HUMAN	Syntaxin-12		Ace|R(2), Ace|R<C13N15>(1)	72	580.258	2
	-	M	S	other	3	Ace(3)	Ace	MSEDE	MSEDEEKVKLR	R	100	100	0						0.972	-0.0409718	-0.232705		1	11	P56962	STX17_HUMAN	Syntaxin-17		Ace|R<C13N15>(2), Ace|R(1)	47	758.387	2
	M	S	E	NatA	2	Ace(2)	Ace	SEDEE	SEDEEKVKLR	R<C13N15>	100	100	0						1.37506	0.459495	0.998181		2	11	P56962	STX17_HUMAN	Syntaxin-17		Ace|R(1), Ace|R<C13N15>(1)	54	689.873	2
	M	S	Y	NatA	2	Ace(2)	Ace	SYTPG	SYTPGVGGDPAQLAQR	R	100	100	0						1.08126	0.112713	0.14528		2	17	O15400	STX7_HUMAN	Syntaxin-7		Ace|R<C13N15>(1), Ace|R(1)	109	829.91	2
	-	M	D	NatB	2	Ace(2)	Ace	MDFLL	MDFLLGNPFSSPVGQR	R	100	100	0						1.01861	0.0266018	-0.0665096		1	16	O60784	TOM1_HUMAN	Target of Myb protein 1		Ace|R(1), Ace|R<C13N15>(1)	61	911.944	2
	M	S	Y	NatA	2	Ace(2)	Ace	SYIPG	SYIPGQPVTAVVQR	R	100	100	0						0.91681	-0.125305	-0.440122		2	15	O14907	TX1B3_HUMAN	Tax1-binding protein 3		Ace|R(2)	67	778.925	2
	-	M	E	NatB	3	Ace(3)	Ace	MEPIT	MEPITFTAR	R	100	100	0						1.92194	0.942561	2.18627		1	9	Q86TI0	TBCD1_HUMAN	TBC1 domain family member 1		Ace|R(2), Ace|R<C13N15>(1)	59	562.276	2
	M	A	K	NatA	3	Ace(2), AcD3C13(1)	AcD3C13	AKSNG	AKSNGENGPR	R	54.7459	98.3946	43.6487	√					0.65052	-0.620335	-1.65764		2	11	Q9BXI6	TB10A_HUMAN	TBC1 domain family member 10A		Ace|R<C13N15>(1), AcD3C13|R(1), Ace|R(1)	65	562.293	2
	-	M	E	NatB	1	Ace(1)	Ace	METGT	METGTAPLVAPPR	R	100	100	0						1.23592	0.305585	0.619645		1	13	Q4KMP7	TB10B_HUMAN	TBC1 domain family member 10B		Ace|R(1)	72	699.359	2
	-	M	V	other	1	Ace(1)	Ace	MVGPE	MVGPEDAGACSGR	R<C13N15>	100	100	0						0.590909	-0.758992	-1.99866		1	13	O60347	TBC12_HUMAN	TBC1 domain family member 12		Ace|R<C13N15>(1)	37	687.786	2
	-	M	E	NatB	2	Ace(2)	Ace	MEGAG	MEGAGENAPESSSSAPGSEESAR	R	100	100	0						0.978905	-0.0307592	-0.207588		1	23	Q9BYX2	TBD2A_HUMAN	TBC1 domain family member 2A		Ace|R(2)	46	1147.97	2
	-	M	E	NatB	24	Ace(24)	Ace	MEGPL	MEGPLSVFGDR	R	100	100	0						0.917685	-0.123928	-0.436735		1	11	P17987	TCPA_HUMAN	T-complex protein 1 subunit alpha		Ace|R<C13N15>(14), Ace|R(10)	92	633.295	2
	M	A	S	NatA	15	Ace(15)	Ace	ASLSL	ASLSLAPVNIFKAGADEER	R	100	100	0						0.939654	-0.089798	-0.352792		2	20	P78371	TCPB_HUMAN	T-complex protein 1 subunit beta		Ace|R(8), Ace|R<C13N15>(7)	135	1039.05	2
	M	P	E	none	9	AcD3C13(9)	AcD3C13	PENVA	PENVAPR	R	0	0	0						0.874792	-0.192988	-0.606585		2	8	P50991	TCPD_HUMAN	T-complex protein 1 subunit delta		AcD3C13|R(4), AcD3C13|R<C13N15>(5)	56	415.229	2
	M	A	S	NatA	2	Ace(2)	Ace	ASMGT	ASMGTLAFDEYGR	R	100	100	0						0.92807	-0.107694	-0.396808		2	14	P48643	TCPE_HUMAN	T-complex protein 1 subunit epsilon		Ace|R<C13N15>(1), Ace|R(1)	66	738.327	2
	M	A	A	NatA	20	Ace(20)	Ace	AAVKT	AAVKTLNPKAEVAR	R	100	100	0						0.935481	-0.0962197	-0.368587		2	15	P40227	TCPZ_HUMAN	T-complex protein 1 subunit zeta		Ace|R(12), Ace|R<C13N15>(8)	105	802.477	2
	-	M	E	NatB	2	Ace(2)	Ace	MEPAP	MEPAPSEVR	R	100	100	0						1.03896	0.0551401	0.0036798		1	9	Q9Y4R8	TELO2_HUMAN	Telomere length regulation protein TEL2 homolog		Ace|R<C13N15>(1), Ace|R(1)	51	537.25	2
	-	M	D	NatB	1	Ace(1)	Ace	MDVKE	MDVKER	R	100	100	0						1.99879	0.999127	2.3254		1	6	Q6N022	TEN4_HUMAN	Teneurin-4	Q9P273 (1-6)	Ace|R(1)	36	441.721	2
	M	A	A	NatA	1	Ace(1)	Ace	AAPAG	AAPAGGGGSAVSVLAPNGR	R	100	100	0						0.74529	-0.424126	-1.17507		2	20	Q9BZE9	ASPC1_HUMAN	Tether containing UBX domain for GLUT4		Ace|R(1)	33	825.931	2
	M	S	D	NatA	1	Ace(1)	Ace	SDPEG	SDPEGETLR	R	100	100	0						N.D.				2	10	Q96NG3	TTC25_HUMAN	Tetratricopeptide repeat protein 25		Ace|R(1)	36	523.243	2
	M	S	S	NatA	2	Ace(2)	Ace	SSKEV	SSKEVKTALKSAR	R	100	100	0						1.13413	0.18158	0.314655		2	14	Q6PGP7	TTC37_HUMAN	Tetratricopeptide repeat protein 37		Ace|R(2)	79	794.472	2
	-	M	E	NatB	1	Ace(1)	Ace	MEQPG	MEQPGQDPTSDDVMDSFLEKFQSQPYR	R	100	100	0						0.8622	-0.213906	-0.658032		1	27	O95801	TTC4_HUMAN	Tetratricopeptide repeat protein 4		Ace|R(1)	30	1099.48	3
	M	A	T	NatA	4	Ace(4)	Ace	ATKKA	ATKKAGSR	R	100	100	0						0.504563	-0.986893	-2.55918		2	9	Q86TV6	TTC7B_HUMAN	Tetratricopeptide repeat protein 7B		Ace|R<C13N15>(2), Ace|R(2)	65	477.787	2
	M	A	Q	NatA	1	Ace(1)	Ace	AQGLI	AQGLIEVER	R	100	100	0						0.73461	-0.44495	-1.22628		2	10	Q9BU02	THTPA_HUMAN	Thiamine-triphosphatase		Ace|R(1)	52	528.788	2
	-	M	K	other	2	AcD3C13(2)	AcD3C13	MKPPA	MKPPAACAGDMADAASPCSVVNDLR	R<C13N15>	11	5	-6						1.02798	0.0398122	-0.0340189		1	25	P52888	THOP1_HUMAN	Thimet oligopeptidase		AcD3C13|R<C13N15>(1), AcD3C13|R(1)	67	914.084	3
	-	M	V	other	3	AcD3C13(3)	AcD3C13	MVGVK	MVGVKPVGSDPDFQPELSGAGSR	R	28	21	-7						0.707123	-0.499966	-1.36159		1	23	O43396	TXNL1_HUMAN	Thioredoxin-like protein 1		AcD3C13|R(2), AcD3C13|R<C13N15>(1)	68	1220.61	2
	M	V	G	NatA	6	AcD3C13(6)	AcD3C13	VGVKP	VGVKPVGSDPDFQPELSGAGSR	R	0	0	0						0.93113	-0.102945	-0.385128		2	23	O43396	TXNL1_HUMAN	Thioredoxin-like protein 1		AcD3C13|R(4), AcD3C13|R<C13N15>(2)	86	765.064	3
	M	A	G	NatA	2	Ace(2)	Ace	AGAPT	AGAPTVSLPELR	R<C13N15>	89	90	1						1.14881	0.20014	0.360304		2	13	Q8NFU3	TSTD1_HUMAN	Thiosulfate sulfurtransferase/rhodanese-like domain-containing protein 1		Ace|R(1), Ace|R<C13N15>(1)	67	631.854	2
	M	S	P	none	3	AcD3C13(3)	AcD3C13	SPTPP	SPTPPLFSLPEAR	R	0	0	0						0.99632	-0.00531891	-0.145018		2	14	Q96FV9	THOC1_HUMAN	THO complex subunit 1		AcD3C13|R(2), AcD3C13|R<C13N15>(1)	66	729.901	2
	M	A	D	NatA	13	Ace(13)	Ace	ADKMD	ADKMDMSLDDIIKLNR	R<C13N15>	100	100	0						1.27277	0.347967	0.72388		2	17	Q86V81	THOC4_HUMAN	THO complex subunit 4		Ace|R(7), Ace|R<C13N15>(6)	88	1028.52	2
	M	S	S	NatA	3	Ace(2), AcD3C13(1)	Ace	SSESS	SSESSKKR	R	93.8489	100	6.15114	√					0.92671	-0.10981	-0.402012		2	9	Q13769	THOC5_HUMAN	THO complex subunit 5 homolog		Ace|R(1), AcD3C13|R(1), Ace|R<C13N15>(1)	56	522.785	2
	M	G	A	NatA	3	Ace(2), AcD3C13(1)	Ace	GAVTD	GAVTDDEVIR	R<C13N15>	64	96	32	√	√	√			0.670968	-0.575685	-1.54782		2	11	Q6I9Y2	THOC7_HUMAN	THO complex subunit 7 homolog		Ace|R<C13N15>(1), AcD3C13|R(1), Ace|R(1)	58	563.784	2
	M	T	M	NatA	1	AcD3C13(1)	AcD3C13	TMEKG	TMEKGMSSGEGLPSR	R	15.1594	45.9459	30.7865	√					1.61051	0.687518	1.559		2	16	Q9H6P5	TASP1_HUMAN	Threonine aspartase 1		AcD3C13|R(1)	67	846.897	2
	M	A	A	NatA	5	Ace(5)	Ace	AAPAQ	AAPAQQTTQPGGGKR	R	95	100	5	√					1.03507	0.0497299	-0.0096266		2	16	Q9NXG2	THUM1_HUMAN	THUMP domain-containing protein 1		Ace|R(3), Ace|R<C13N15>(2)	77	778.911	2
	M	S	C	NatA	1	Ace(1)	Ace	SCINL	SCINLPTVLPGSPSKTR	R<C13N15>	100	100	0						1.2021	0.265557	0.521195		2	18	P04183	KITH_HUMAN	Thymidine kinase, cytosolic		Ace|R<C13N15>(1)	79	963.521	2
	M	A	A	NatA	3	Ace(3)	Ace	AALMT	AALMTPGTGAPPAPGDFSGEGSQGLPDPSPEPKQLPELIR	R	100	100	0						1.60253	0.680351	1.54137		2	41	P19971	TYPH_HUMAN	Thymidine phosphorylase		Ace|R(3)	48	1022.76	4
	M	P	V	none	3	AcD3C13(3)	AcD3C13	PVAGS	PVAGSELPR	R	0	0	0						0.49948	-1.0015	-2.59511	99% siCTR	2	10	P04818	TYSY_HUMAN	Thymidylate synthase		AcD3C13|R<C13N15>(2), AcD3C13|R(1)	85	486.777	2
	M	A	D	NatA	3	Ace(3)	Ace	ADKPD	ADKPDMGEIASFDKAKLKKTETQEKNTLPTKETIEQEKR	R<C13N15>	100	100	0						1.29487	0.372809	0.78498		2	40	P63313	TYB10_HUMAN	Thymosin beta-10		Ace|R<C13N15>(3)	43	1231.17	4
	M	S	K	NatA	2	Ace(1), AcD3C13(1)	Ace	SKTNK	SKTNKSKSGSR	R	72	100	28	√					1.00795	0.0114228	-0.103842		2	12	Q9Y2W1	TR150_HUMAN	Thyroid hormone receptor-associated protein 3		Ace|R(1), AcD3C13|R(1)	70	681.885	2
	M	T	S	NatA	5	Ace(5)	Ace	TSAAP	TSAAPAKKPYR	R<C13N15>	100	100	0						1.03323	0.0471642	-0.0159367		2	12	Q5JTD0	TJAP1_HUMAN	Tight junction-associated protein 1		Ace|R(3), Ace|R<C13N15>(2)	51	668.384	2
	M	A	T	NatA	2	Ace(2)	Ace	ATTVS	ATTVSTQR	R<C13N15>	100	100	0						0.88941	-0.169079	-0.547784		2	9	Q9H0E2	TOLIP_HUMAN	Toll-interacting protein		Ace|R(1), Ace|R<C13N15>(1)	57	458.242	2
	-	M	N	NatB or other	2	Ace(2)	Ace	MNSVG	MNSVGEACTDMKR	R<C13N15>	100	100	0						1.005	0.0071955	-0.114239		1	13	O43715	TRIA1_HUMAN	TP53-regulated inhibitor of apoptosis 1		Ace|R<C13N15>(1), Ace|R(1)	76	815.349	2
	-	M	D	NatB	2	Ace(2)	Ace	MDLAQ	MDLAQPSQPVDELELSVLER	R	100	100	0						1.36174	0.445451	0.963642		1	20	Q5BVD1	TTMP_HUMAN	TPA-induced transmembrane protein		Ace|R(1), Ace|R<C13N15>(1)	73	1164.08	2
	-	M	D	NatB	3	Ace(3)	Ace	MDKNI	MDKNIGEQLNKAYEAFR	R	100	100	0						1.09787	0.134712	0.199384		1	17	Q92844	TANK_HUMAN	TRAF family member-associated NF-kappa-B activator		Ace|R(2), Ace|R<C13N15>(1)	103	1090.04	2
	-	M	N	NatB or other	2	Ace(2)	Ace	MNAAV	MNAAVVR	R	100	100	0						0.833043	-0.263536	-0.780098		1	7	Q8TDR0	MIPT3_HUMAN	TRAF3-interacting protein 1		Ace|R(1), Ace|R<C13N15>(1)	58	409.713	2
	M	A	E	NatA	2	Ace(2)	Ace	AEFLD	AEFLDDQETR	R	100	100	0						1.21026	0.275317	0.5452		2	11	O14545	TRAD1_HUMAN	TRAF-type zinc finger domain-containing protein 1		Ace|R(1), Ace|R<C13N15>(1)	68	633.286	2
	-	M	E	NatB	1	Ace(1)	Ace	MEVTA	MEVTADQPR	R	100	100	0						2.18269	1.12611	2.6377	99% siNatA	1	9	P23771	GATA3_HUMAN	Trans-acting T-cell-specific transcription factor GATA-3		Ace|R(1)	55	552.753	2
	M	S	S	NatA	2	Ace(2)	Ace	SSSPV	SSSPVKR	R	100	100	0						1.19306	0.254667	0.494411		2	8	P37837	TALDO_HUMAN	Transaldolase		Ace|R(1), Ace|R<C13N15>(1)	48	425.243	2
	M	S	T	NatA	2	Ace(2)	Ace	STPDP	STPDPPLGGTPR	R<C13N15>	100	100	0						1.04445	0.0627434	0.02238		2	13	P51532	SMCA4_HUMAN	Transcription activator BRG1		Ace|R<C13N15>(1), Ace|R(1)	44	623.818	2
	-	M	E	NatB	2	Ace(2)	Ace	MEEMK	MEEMKKTAIR	R	100	100	0						1.36169	0.445398	0.963512		1	10	Q99990	VGLL1_HUMAN	Transcription cofactor vestigial-like protein 1		Ace|R<C13N15>(1), Ace|R(1)	55	702.862	2
	-	M	E	NatB	1	Ace(1)	Ace	METPL	METPLDVLSR	R<C13N15>	100	100	0						1.37673	0.461246	1.00249		1	10	Q14135	VGLL4_HUMAN	Transcription cofactor vestigial-like protein 4		Ace|R<C13N15>(1)	51	614.809	2
	-	M	D	NatB	3	Ace(3)	Ace	MDKFV	MDKFVIR	R<C13N15>	100	100	0						1.20842	0.273126	0.539811		1	7	Q96MN5	TEAN2_HUMAN	Transcription elongation factor A N-terminal and central domain-containing protein 2		Ace|R(2), Ace|R<C13N15>(1)	52	512.28	2
	-	M	E	NatB	6	Ace(6)	Ace	MEDEV	MEDEVVR	R<C13N15>	100	100	0						0.790025	-0.34003	-0.968232		1	7	P23193	TCEA1_HUMAN	Transcription elongation factor A protein 1		Ace|R(3), Ace|R<C13N15>(3)	59	473.215	2
	-	M	M	other	3	AcD3C13(2), Ace(1)	AcD3C13	MMGKE	MMGKEEEIAR	R	38	41	3						1.37134	0.455586	0.988569		1	10	Q15560	TCEA2_HUMAN	Transcription elongation factor A protein 2		AcD3C13|R(1), AcD3C13|R<C13N15>(1), Ace|R(1)	53	660.317	2
	-	M	E	NatB	1	Ace(1)	Ace	MEKLY	MEKLYSENEGMASNQGKMENEEQPQDER	R	100	100	0						2.67666	1.42043	3.36159	99% siNatA	1	28	Q96EI5	TCAL4_HUMAN	Transcription elongation factor A protein-like 4		Ace|R(1)	37	1162.5	3
	-	M	D	NatB	7	Ace(7)	Ace	MDVFL	MDVFLMIR	R	100	100	0						1.12769	0.173371	0.294465		1	8	Q15370	ELOB_HUMAN	Transcription elongation factor B polypeptide 2		Ace|R<C13N15>(4), Ace|R(3)	55	549.77	2
	M	A	L	NatA	2	Ace(2)	Ace	ALETV	ALETVPKDLR	R	100	100	0						1.09874	0.13585	0.202184		2	11	P63272	SPT4H_HUMAN	Transcription elongation factor SPT4		Ace|R<C13N15>(1), Ace|R(1)	77	615.856	2
	I	M	N	NatB or other	15	Ace(15)	Ace	MNQEK	MNQEKLAKLQAQVR	R<C13N15>	100	100	0						1.00982	0.0140982	-0.097262		1	14	Q96K17	BT3L4_HUMAN	Transcription factor BTF3 homolog 4	P20290 (50-63)	Ace|R(9), Ace|R<C13N15>(6)	90	910.008	2
	M	T	A	NatA	1	Ace(1)	Ace	TAKNV	TAKNVGLTSTNAEVR	R<C13N15>	100	100	0						0.96497	-0.051444	-0.258462		2	16	Q14188	TFDP2_HUMAN	Transcription factor Dp-2		Ace|R<C13N15>(1)	48	830.448	2
	M	A	E	NatA	3	Ace(3)	Ace	AEAGP	AEAGPQAPPPPGTPSR	R	100	100	0						1.07686	0.106831	0.130812		2	17	Q16254	E2F4_HUMAN	Transcription factor E2F4		Ace|R(2), Ace|R<C13N15>(1)	44	786.394	2
	M	S	E	NatA	1	Ace(1)	Ace	SETPA	SETPAQCSIKQER	R	N.D.	N.D.	N.D.						N.D.				2	14	P41212	ETV6_HUMAN	Transcription factor ETV6		Ace|R(1)	64	811.893	2
	-	M	D	NatB	1	Ace(1)	Ace	MDTGD	MDTGDTALGQKATSR	R	100	100	0						1.00965	0.0138553	-0.0978594		1	15	P31629	ZEP2_HUMAN	Transcription factor HIVEP2		Ace|R(1)	80	828.897	2
	M	S	V	NatA	1	Ace(1)	Ace	SVDPL	SVDPLSSKALKIKR	R	100	100	0						0.87209	-0.197451	-0.617563		2	15	Q9ULX9	MAFF_HUMAN	Transcription factor MafF		Ace|R(1)	68	863.032	2
	-	M	Q	NatB or other	4	Ace(4)	Ace	MQQAL	MQQALELALDR	R	100	100	0						0.92827	-0.107384	-0.396044		1	11	Q8NEM7	SP20H_HUMAN	Transcription factor SPT20 homolog		Ace|R(2), Ace|R<C13N15>(2)	87	673.343	2
	M	A	N	NatA	2	Ace(2)	Ace	ANSAN	ANSANTNTVPKLYR	R<C13N15>	100	100	0						1.023	0.0328061	-0.0512501		2	15	P52655	TF2AA_HUMAN	Transcription initiation factor IIA subunit 1		Ace|R<C13N15>(1), Ace|R(1)	80	824.438	2
	M	A	Y	NatA	2	Ace(2)	Ace	AYQLY	AYQLYR	R<C13N15>	63	67	4						1.07779	0.108073	0.133867		2	7	P52657	T2AG_HUMAN	Transcription initiation factor IIA subunit 2		Ace|R<C13N15>(1), Ace|R(1)	38	433.226	2
	-	M	D	NatB	2	Ace(2)	Ace	MDPSL	MDPSLLR	R	100	100	0						1.14114	0.190476	0.336535		1	7	P29084	T2EB_HUMAN	Transcription initiation factor IIE subunit beta		Ace|R<C13N15>(1), Ace|R(1)	52	445.226	2
	M	A	D	NatA	5	Ace(5)	Ace	ADAAA	ADAAATAGAGGSGTR	R	100	100	0						0.88411	-0.177702	-0.568991		2	16	Q7Z7C8	TAF8_HUMAN	Transcription initiation factor TFIID subunit 8		Ace|R<C13N15>(2), Ace|R(3)	124	638.3	2
	-	M	E	NatB	3	Ace(3)	Ace	MESGK	MESGKMAPPKNAPR	R	100	100	0						1.17543	0.233193	0.441596		1	14	Q9HBM6	TAF9B_HUMAN	Transcription initiation factor TFIID subunit 9B		Ace|R(2), Ace|R<C13N15>(1)	54	841.419	2
	M	A	A	NatA	5	Ace(5)	Ace	AASAA	AASAAAASAAAASAASGSPGPGEGSAGGEKR	R	85	100	15	√				(√)	0.926019	-0.110887	-0.404659		2	32	Q13263	TIF1B_HUMAN	Transcription intermediary factor 1-beta		Ace|R(5)	133	878.09	3
	M	A	E	NatA	4	Ace(4)	Ace	AETAA	AETAAGVGR	R	N.D.	N.D.	N.D.						0.992105	-0.0114353	-0.160061		2	10	Q12788	TBL3_HUMAN	Transducin beta-like protein 3		Ace|R<C13N15>(2), Ace|R(2)	72	437.225	2
	M	S	D	NatA	1	Ace(1)	Ace	SDVEE	SDVEENNFEGR	R<C13N15>	100	100	0						0.7285	-0.456999	-1.25592		2	12	Q13595	TRA2A_HUMAN	Transformer-2 protein homolog alpha		Ace|R<C13N15>(1)	39	674.288	2
	M	S	D	NatA	2	Ace(2)	Ace	SDSGE	SDSGEQNYGER	R	100	100	0						1.13047	0.176923	0.303202		2	12	P62995	TRA2B_HUMAN	Transformer-2 protein homolog beta		Ace|R<C13N15>(1), Ace|R(1)	59	642.26	2
	M	S	L	NatA	1	Ace(1)	Ace	SLLDG	SLLDGLASSPR	R<C13N15>	N.D.	100	N.D.						N.D.				2	12	Q3YBR2	TBRG1_HUMAN	Transforming growth factor beta regulator 1		Ace|R<C13N15>(1)	35	584.316	2
	M	A	N	NatA	5	Ace(5)	Ace	ANKGP	ANKGPSYGMSR	R<C13N15>	100	100	0						2.7172	1.44212	3.41493	99% siNatA	2	12	Q01995	TAGL_HUMAN	Transgelin		Ace|R(3), Ace|R<C13N15>(2)	58	641.807	2
	-	M	E	NatB	2	Ace(2)	Ace	MESAL	MESALAVPR	R<C13N15>	100	100	0						0.416495	-1.26363	-3.23981	99% siCTR	1	9	Q96EM0	T3HPD_HUMAN	Trans-L-3-hydroxyproline dehydratase		Ace|R<C13N15>(1), Ace|R(1)	72	521.267	2
	M	P	G	none	3	AcD3C13(3)	AcD3C13	PGSAA	PGSAAKGSELSER	R<C13N15>	0	0	0						1.26884	0.343506	0.71291		2	14	P49770	EI2BB_HUMAN	Translation initiation factor eIF-2B subunit beta		AcD3C13|R(1), AcD3C13|R<C13N15>(2)	66	696.869	2
	M	A	A	NatA	3	Ace(3)	Ace	AAVAV	AAVAVAVR	R<C13N15>	96	100	4						1.00358	0.00516171	-0.119241		2	9	Q9UI10	EI2BD_HUMAN	Translation initiation factor eIF-2B subunit delta		Ace|R<C13N15>(2), Ace|R(1)	69	404.749	2
	M	A	A	NatA	2	Ace(2)	Ace	AAPVV	AAPVVAPPGVVVSR	R	100	100	0						0.78439	-0.350357	-0.993632		2	15	Q13144	EI2BE_HUMAN	Translation initiation factor eIF-2B subunit epsilon		Ace|R<C13N15>(1), Ace|R(1)	57	680.902	2
	-	M	E	NatB	2	Ace(2)	Ace	MEFQA	MEFQAVVMAVGGGSR	R<C13N15>	100	100	0						0.77442	-0.368812	-1.03902		1	15	Q9NR50	EI2BG_HUMAN	Translation initiation factor eIF-2B subunit gamma		Ace|R<C13N15>(1), Ace|R(1)	86	811.881	2
	M	P	K	none	2	AcD3C13(2)	AcD3C13	PKAPK	PKAPKGKSAGR	R	0	0	0						0.98035	-0.0286312	-0.202354		2	12	Q96EY4	TMA16_HUMAN	Translation machinery-associated protein 16		AcD3C13|R(1), AcD3C13|R<C13N15>(1)	60	642.905	2
	M	A	A	NatA	2	AcD3C13(1), Ace(1)	AcD3C13	AADTQ	AADTQVSETLKR	R	38	82	44	√	√	√	√	√	0.893356	-0.162693	-0.532077		2	13	Q92616	GCN1L_HUMAN	Translational activator GCN1		AcD3C13|R(1), Ace|R<C13N15>(1)	68	706.888	2
	M	S	N	NatA	2	Ace(2)	Ace	SNKEG	SNKEGSGGFR	R	100	100	0						0.66497	-0.588639	-1.57968		2	11	Q99598	TSNAX_HUMAN	Translin-associated protein X		Ace|R<C13N15>(1), Ace|R(1)	69	564.275	2
	-	M	E	NatB	1	Ace(1)	Ace	MEPSG	MEPSGSEQLFEDPDPGGKSQDAEAR	R	100	100	0						3.44733	1.78548	4.25941	99% siNatA	1	25	O94876	TMCC1_HUMAN	Transmembrane and coiled-coil domains protein 1		Ace|R(1)	55	928.075	3
	M	S	E	NatA	1	Ace(1)	Ace	SEQEA	SEQEAQAPGGR	R	93.9422	100	6.05778	√					1.35139	0.434439	0.936558		2	12	Q96AQ2	TM125_HUMAN	Transmembrane protein 125		Ace|R(1)	38	586.271	2
	-	M	Y	NatC or other	2	Ace(2)	Ace	MYAPG	MYAPGGAGLPGGR	R<C13N15>	100	100	0						1.30182	0.38053	0.803969		1	13	O75204	TM127_HUMAN	Transmembrane protein 127		Ace|R(1), Ace|R<C13N15>(1)	49	636.308	2
	M	A	S	NatA	2	Ace(2)	Ace	ASSLL	ASSLLAGER	R	100	100	0						2.4109	1.26957	2.99055	99% siNatA	2	10	Q8N511	TM199_HUMAN	Transmembrane protein 199		Ace|R(1), Ace|R<C13N15>(1)	88	473.254	2
	-	M	E	NatB	1	Ace(1)	Ace	MEGVS	MEGVSALLAR	R	100	100	0						2.65551	1.40899	3.33344	99% siNatA	1	10	Q5SNT2	TM201_HUMAN	Transmembrane protein 201		Ace|R(1)	69	552.79	2
	-	M	A	other	2	Ace(2)	Ace	MAPKG	MAPKGKVGTR	R	100	100	0						1.10443	0.143302	0.220512		1	10	Q9BTX3	TM208_HUMAN	Transmembrane protein 208		Ace|R<C13N15>(1), Ace|R(1)	66	598.842	2
	M	A	T	NatA	2	Ace(2)	Ace	ATKTA	ATKTAGVGR	R	100	100	0						1.79673	0.845374	1.94724		2	10	Q6NUQ4	TM214_HUMAN	Transmembrane protein 214		Ace|R(1), Ace|R<C13N15>(1)	55	475.274	2
	-	M	E	NatB	2	Ace(2)	Ace	MEDFA	MEDFATR	R	100	100	0						1.36806	0.452132	0.980072		1	7	Q9BU79	TM243_HUMAN	Transmembrane protein 243		Ace|R(1), Ace|R<C13N15>(1)	52	464.197	2
	-	M	E	NatB	4	Ace(2), AcD3C13(2)	Ace	MELEA	MELEAMSR	R<C13N15>	90	90	0						1.62283	0.698515	1.58605		1	8	P61165	TM258_HUMAN	Transmembrane protein 258		Ace|R(1), Ace|R<C13N15>(1), AcD3C13|R(1), AcD3C13|R<C13N15>(1)	51	525.727	2
	M	A	A	NatA	3	Ace(2), AcD3C13(1)	Ace	AANYS	AANYSSTSTR	R	67	85	18	√					2.36134	1.2396	2.91684	99% siNatA	2	11	Q9BTV4	TMM43_HUMAN	Transmembrane protein 43		Ace|R(1), AcD3C13|R(1), Ace|R<C13N15>(1)	54	550.254	2
	M	S	G	NatA	3	Ace(2), AcD3C13(1)	Ace	SGFLE	SGFLEGLR	R<C13N15>	N.D.	100	N.D.		√	√			N.D.				2	9	O95807	TM50A_HUMAN	Transmembrane protein 50A		Ace|R<C13N15>(1), AcD3C13|R(1), Ace|R(1)	49	465.75	2
	-	M	T	other	1	Ace(1)	Ace	MTEQE	MTEQETLALLEVKR	R	100	N.D.	N.D.						2.04808	1.03427	2.41183		1	14	Q9BSE2	TMM79_HUMAN	Transmembrane protein 79		Ace|R(1)	45	883.472	2
	M	A	E	NatA	3	Ace(3)	Ace	AELDL	AELDLMAPGPLPR	R<C13N15>	100	100	0						0.990123	-0.0143199	-0.167156		2	14	O95361	TRI16_HUMAN	Tripartite motif-containing protein 16		Ace|R<C13N15>(1), Ace|R(2)	89	724.378	2
	R	M	D	NatB	1	Ace(1)	Ace	MDELG	MDELGAGIAQSR	R	100	100	0						2.47941	1.31	3.08997	99% siNatA	239	250	Q96LD4	TRI47_HUMAN	Tripartite motif-containing protein 47		Ace|R(1)	58	653.31	2
	M	A	L	NatA	1	Ace(1)	Ace	ALSCT	ALSCTLNR	R	N.D.	100	N.D.						N.D.				2	9	Q7Z4G4	TRM11_HUMAN	tRNA (guanine(10)-N2)-methyltransferase homolog		Ace|R(1)	39	488.748	2
	-	M	N	NatB or other	1	Ace(1)	Ace	MNFSG	MNFSGGGR	R	100	100	0						N.D.				1	8	Q86TN4	TRPT1_HUMAN	tRNA 2'-phosphotransferase 1		Ace|R(1)	41	442.19	2
	M	A	E	NatA	2	Ace(2)	Ace	AEGTA	AEGTAEAPLENGGGGDSGAGALER	R	73	100	27	√					0.78662	-0.346262	-0.98356		2	25	Q96G46	DUS3L_HUMAN	tRNA-dihydrouridine(47) synthase [NAD(P)(+)]-like		Ace|R<C13N15>(1), Ace|R(1)	93	1114.51	2
	-	M	L	NatC or other	3	AcD3C13(2), Ace(1)	AcD3C13	MLVVE	MLVVEVANGR	R	6	7	1						1.27599	0.351617	0.732858		1	10	Q9BSV6	SEN34_HUMAN	tRNA-splicing endonuclease subunit Sen34		AcD3C13|R(1), AcD3C13|R<C13N15>(1), Ace|R(1)	101	575.815	2
	M	A	G	NatA	25	Ace(25)	Ace	AGLNS	AGLNSLEAVKR	R<C13N15>	100	100	0						1.07098	0.0989356	0.111394		2	12	P67936	TPM4_HUMAN	Tropomyosin alpha-4 chain		Ace|R<C13N15>(13), Ace|R(12)	84	628.863	2
	M	P	N	none	1	AcD3C13(1)	AcD3C13	PNSEP	PNSEPASLLELFNSIATQGELVR	R	0	0	0						0.932018	-0.101571	-0.381748		2	24	P23381	SYWC_HUMAN	Tryptophan--tRNA ligase, cytoplasmic		AcD3C13|R(1)	69	1267.16	2
	M	A	A	NatA	1	Ace(1)	Ace	AAVEK	AAVEKR	R	≥95	100	N.D.						N.D.				2	7	Q6ZTW0	TPGS1_HUMAN	Tubulin polyglutamylase complex subunit 1	Q5XKK7 (51-56)	Ace|R(1)	44	381.727	2
	-	M	E	NatB	3	Ace(3)	Ace	MESVS	MESVSCSAAAVR	R	100	100	0						1.02876	0.0409111	-0.0313161		1	12	Q15814	TBCC_HUMAN	Tubulin-specific chaperone C		Ace|R<C13N15>(2), Ace|R(1)	101	663.295	2
	M	S	D	NatA	2	Ace(2)	Ace	SDTLT	SDTLTADVIGR	R<C13N15>	100	100	0						0.86065	-0.216501	-0.664417		2	12	Q15813	TBCE_HUMAN	Tubulin-specific chaperone E		Ace|R<C13N15>(1), Ace|R(1)	79	600.311	2
	-	M	Y	NatC or other	3	AcD3C13(2), Ace(1)	AcD3C13	MYTFV	MYTFVVR	R	11	9	-2						1.19021	0.251216	0.485925		1	7	Q8NG68	TTL_HUMAN	Tubulin--tyrosine ligase		AcD3C13|R(1), AcD3C13|R<C13N15>(1), Ace|R(1)	54	489.757	2
	-	M	L	NatC or other	6	AcD3C13(5), Ace(1)	AcD3C13	MLEGD	MLEGDLVSKMLR	R<C13N15>	4	4	0						1.72852	0.789537	1.80991		1	12	Q8NHU6	TDRD7_HUMAN	Tudor domain-containing protein 7		AcD3C13|R(2), AcD3C13|R<C13N15>(3), Ace|R(1)	78	764.409	2
	M	A	E	NatA	4	Ace(4)	Ace	AEQVL	AEQVLPQALYLSNMR	R	100	100	0						0.60458	-0.725995	-1.91751		2	16	P21580	TNAP3_HUMAN	Tumor necrosis factor alpha-induced protein 3		Ace|R(2), Ace|R<C13N15>(2)	90	895.96	2
	-	M	D	NatB	2	Ace(2)	Ace	MDSAG	MDSAGQDINLNSPNKGLLSDSMTDVPVDTGVAAR	R	100	100	0						0.95855	-0.0610744	-0.282147		1	34	O43399	TPD54_HUMAN	Tumor protein D54		Ace|R(1), Ace|R<C13N15>(1)	52	1203.9	3
	-	M	E	NatB	4	Ace(4)	Ace	MEQVE	MEQVEILR	R	100	100	0						0.5153	-0.956516	-2.48447		1	8	Q05209	PTN12_HUMAN	Tyrosine-protein phosphatase non-receptor type 12		Ace|R<C13N15>(2), Ace|R(2)	62	538.276	2
	M	P	F	none	2	AcD3C13(2)	AcD3C13	PFGLK	PFGLKLR	R	0	0	0						1.05926	0.0830567	0.0723402		2	8	Q15678	PTN14_HUMAN	Tyrosine-protein phosphatase non-receptor type 14		AcD3C13|R<C13N15>(1), AcD3C13|R(1)	43	462.802	2
	-	M	E	NatB	2	Ace(2)	Ace	MELGS	MELGSCLEGGR	R	100	100	0						1.04283	0.060504	0.0168722		1	11	O95551	TYDP2_HUMAN	Tyrosyl-DNA phosphodiesterase 2		Ace|R(1), Ace|R<C13N15>(1)	86	633.776	2
	M	A	D	NatA	4	Ace(4)	Ace	ADKTP	ADKTPGGSQKASSKTR	R<C13N15>	100	100	0						1.01327	0.0190258	-0.0851427		2	17	O15042	SR140_HUMAN	U2 snRNP-associated SURP motif-containing protein		Ace|R(3), Ace|R<C13N15>(1)	90	906.493	2
	M	A	E	NatA	6	Ace(6)	Ace	AEIIQ	AEIIQER	R	100	100	0						0.72839	-0.457217	-1.25645		2	8	Q9NYH9	UTP6_HUMAN	U3 small nucleolar RNA-associated protein 6 homolog		Ace|R<C13N15>(3), Ace|R(3)	68	450.742	2
	-	M	I	NatC or other	5	Ace(3), AcD3C13(2)	Ace	MIEQQ	MIEQQKR	R	79	82	3						1.09791	0.13476	0.199503		1	7	Q96DI7	SNR40_HUMAN	U5 small nuclear ribonucleoprotein 40 kDa protein		Ace|R<C13N15>(1), AcD3C13|R(1), AcD3C13|R<C13N15>(1), Ace|R(2)	61	519.274	2
	M	A	D	NatA	7	Ace(7)	Ace	ADDVD	ADDVDQQQTTNTVEEPLDLIR	R<C13N15>	100	100	0						1.00264	0.00379959	-0.122591		2	22	P62310	LSM3_HUMAN	U6 snRNA-associated Sm-like protein LSm3		Ace|R(4), Ace|R<C13N15>(3)	108	1226.59	2
	M	A	A	NatA	5	Ace(5)	Ace	AANAT	AANATTNPSQLLPLELVDKCIGSR	R<C13N15>	100	100	0						1.04598	0.0648553	0.027574		2	25	Q9Y4Y9	LSM5_HUMAN	U6 snRNA-associated Sm-like protein LSm5		Ace|R(3), Ace|R<C13N15>(2)	77	1334.2	2
	M	S	V	NatA	1	Ace(1)	Ace	SVNMD	SVNMDELR	R<C13N15>	100	100	0						0.569	-0.813499	-2.13272		2	9	Q8IYN6	UBAD2_HUMAN	UBA-like domain-containing protein 2		Ace|R<C13N15>(1)	51	516.239	2
	M	A	E	NatA	1	Ace(1)	Ace	AENGE	AENGESSGPPR	R	100	100	0						1.04027	0.0569559	0.00814566		2	12	Q9UHD9	UBQL2_HUMAN	Ubiquilin-2		Ace|R(1)	55	571.757	2
	M	A	E	NatA	3	Ace(3)	Ace	AEGGA	AEGGAADLDTQR	R	100	100	0						0.889223	-0.169382	-0.548528		2	13	Q9Y4E8	UBP15_HUMAN	Ubiquitin carboxyl-terminal hydrolase 15		Ace|R<C13N15>(2), Ace|R(1)	116	623.289	2
	-	M	E	NatB	4	Ace(4)	Ace	MEELS	MEELSADEIR	R	100	100	0						1.00456	0.00656374	-0.115793		1	10	O95155	UBE4B_HUMAN	Ubiquitin conjugation factor E4 B		Ace|R<C13N15>(2), Ace|R(2)	92	625.782	2
	M	A	A	NatA	1	Ace(1)	Ace	AAAGA	AAAGAPDGMEEPGMDTEAETVATEAPAR	R<C13N15>	100	100	0						0.73511	-0.443968	-1.22387		2	29	O14562	UBFD1_HUMAN	Ubiquitin domain-containing protein UBFD1		Ace|R<C13N15>(1)	31	943.74	3
	M	A	A	NatA	1	Ace(1)	Ace	AAEEP	AAEEPQQQKQEPLGSDSEGVNCLAYDEAIMAQQDR	R	85	100	15	√					0.999048	-0.00137465	-0.135317		2	36	Q96FW1	OTUB1_HUMAN	Ubiquitin thioesterase OTUB1		Ace|R(1)	50	1003.46	4
	-	M	M	other	4	Ace(4)	Ace	MMTSV	MMTSVGTNR	R<C13N15>	100	100	0						0.72735	-0.459278	-1.26152		1	9	Q14157	UBP2L_HUMAN	Ubiquitin-associated protein 2-like		Ace|R<C13N15>(2), Ace|R(2)	65	540.738	2
	M	M	T	other	2	Ace(2)	Ace	MTSVG	MTSVGTNR	R	≥92	100	N.D.						0.34748	-1.525	-3.88264	99% siCTR	2	9	Q14157	UBP2L_HUMAN	Ubiquitin-associated protein 2-like		Ace|R<C13N15>(1), Ace|R(1)	41	462.216	2
	-	M	T	other	2	Ace(2)	Ace	MTELQ	MTELQSALLLR	R<C13N15>	100	100	0						0.7442	-0.426238	-1.18026		1	11	P62253	UB2G1_HUMAN	Ubiquitin-conjugating enzyme E2 G1		Ace|R<C13N15>(1), Ace|R(1)	72	671.866	2
	M	T	E	NatA	4	Ace(4)	Ace	TELQS	TELQSALLLR	R	100	100	0						0.89254	-0.164011	-0.535318		2	11	P62253	UB2G1_HUMAN	Ubiquitin-conjugating enzyme E2 G1		Ace|R<C13N15>(2), Ace|R(2)	65	593.346	2
	M	S	S	NatA	2	Ace(2)	Ace	SSPSP	SSPSPGKR	R<C13N15>	100	100	1.03906e-07						0.77098	-0.375235	-1.05482		2	9	P62256	UBE2H_HUMAN	Ubiquitin-conjugating enzyme E2 H		Ace|R<C13N15>(1), Ace|R(1)	44	457.749	2
	M	A	N	NatA	2	Ace(2)	Ace	ANIAV	ANIAVQR	R	100	100	0						0.86404	-0.21083	-0.650468		2	8	P61086	UBE2K_HUMAN	Ubiquitin-conjugating enzyme E2 K		Ace|R<C13N15>(1), Ace|R(1)	54	407.233	2
	-	M	Q	NatB or other	1	Ace(1)	Ace	MQQPQ	MQQPQPQGQQQPGPGQQLGGQGAAPGAGGGPGGGPGPGPCLR	R	100	100	0						0.98483	-0.0220534	-0.186176		1	42	Q7Z7E8	UB2Q1_HUMAN	Ubiquitin-conjugating enzyme E2 Q1		Ace|R(1)	49	993.97	4
	M	A	A	NatA	17	Ace(17)	Ace	AATTG	AATTGSGVKVPR	R	100	100	0						0.97081	-0.0427391	-0.237052		2	13	Q13404	UB2V1_HUMAN	Ubiquitin-conjugating enzyme E2 variant 1		Ace|R<C13N15>(9), Ace|R(8)	91	616.851	2
	M	A	V	NatA	12	Ace(12)	Ace	AVSTG	AVSTGVKVPR	R<C13N15>	100	100	0						0.913447	-0.130607	-0.45316		2	11	Q15819	UB2V2_HUMAN	Ubiquitin-conjugating enzyme E2 variant 2		Ace|R(7), Ace|R<C13N15>(5)	79	556.836	2
	-	M	E	NatB	3	Ace(3)	Ace	MEFDC	MEFDCEGLR	R	100	100	0						1.09127	0.126008	0.177978		1	9	Q8IX04	UEVLD_HUMAN	Ubiquitin-conjugating enzyme E2 variant 3		Ace|R(2), Ace|R<C13N15>(1)	58	607.745	2
	M	S	S	NatA	5	Ace(5)	Ace	SSSPL	SSSPLSKKR	R<C13N15>	100	100	0						1.31763	0.397947	0.846807		2	10	P22314	UBA1_HUMAN	Ubiquitin-like modifier-activating enzyme 1		Ace|R(2), Ace|R<C13N15>(3)	59	568.336	2
	-	M	D	NatB	4	Ace(4)	Ace	MDALD	MDALDASKLLDEELYSR	R<C13N15>	100	100	0						2.77389	1.47191	3.4882	99% siNatA	1	17	P41226	UBA7_HUMAN	Ubiquitin-like modifier-activating enzyme 7		Ace|R(3), Ace|R<C13N15>(1)	83	1042.51	2
	-	M	Q	NatB or other	4	AcD3C13(4)	AcD3C13	MQLTV	MQLTVKALQGR	R	2	3	1						1.05509	0.0773592	0.0583273		1	11	P11441	UBL4A_HUMAN	Ubiquitin-like protein 4A		AcD3C13|R<C13N15>(2), AcD3C13|R(2)	70	677.895	2
	-	M	I	NatC or other	4	AcD3C13(4)	AcD3C13	MIEVV	MIEVVCNDR	R	0	0	0						1.61582	0.692262	1.57067		1	9	Q9BZL1	UBL5_HUMAN	Ubiquitin-like protein 5		AcD3C13|R(2), AcD3C13|R<C13N15>(2)	71	599.781	2
	-	M	F	NatC or other	2	Ace(2)	Ace	MFTLS	MFTLSQTSR	R<C13N15>	100	100	0						1.13072	0.177242	0.303986		1	9	Q7Z3V4	UBE3B_HUMAN	Ubiquitin-protein ligase E3B		Ace|R(1), Ace|R<C13N15>(1)	58	569.776	2
	M	S	K	NatA	1	Ace(1)	Ace	SKAFG	SKAFGLLR	R	100	100	0						N.D.				2	9	Q9UMW8	UBP18_HUMAN	Ubl carboxyl-terminal hydrolase 18		Ace|R(1)	37	490.797	2
	M	A	E	NatA	4	Ace(4)	Ace	AEGGG	AEGGGPEPGEQER	R<C13N15>	100	100	0						0.316065	-1.66171	-4.21887	99% siCTR	2	14	Q14CS0	UBX2B_HUMAN	UBX domain-containing protein 2B		Ace|R<C13N15>(2), Ace|R(2)	58	682.801	2
	-	M	V	other	1	AcD3C13(1)	AcD3C13	MVSKA	MVSKALLR	R	16	15	-1						1.15931	0.213266	0.392588		1	8	Q8NBZ7	UXS1_HUMAN	UDP-glucuronic acid decarboxylase 1		AcD3C13|R(1)	35	514.317	2
	M	T	A	NatA	1	AcD3C13(1)	AcD3C13	TAGGQ	TAGGQAEAEGAGGEPGAAR	R	N.D.	N.D.	N.D.						N.D.				2	20	Q76EJ3	S35D2_HUMAN	UDP-N-acetylglucosamine/UDP-glucose/GDP-mannose transporter		AcD3C13|R(1)	55	852.4	2
	M	A	S	NatA	2	Ace(2)	Ace	ASSVG	ASSVGNVADSTEPTKR	R<C13N15>	100	100	0						1.10825	0.148283	0.232764		2	17	O15294	OGT1_HUMAN	UDP-N-acetylglucosamine--peptide N-acetylglucosaminyltransferase 110 kDa subunit		Ace|R(1), Ace|R<C13N15>(1)	98	859.433	2
	-	M	E	NatB	2	Ace(2)	Ace	MEVDI	MEVDINGESR	R<C13N15>	100	100	0						1.70306	0.768129	1.75726		1	10	Q96GV9	CE030_HUMAN	UNC119-binding protein C5orf30		Ace|R<C13N15>(1), Ace|R(1)	76	609.271	2
	M	S	S	NatA	1	Ace(1)	Ace	SSESE	SSESEKDKER	R	N.D.	N.D.	N.D.						N.D.				2	11	Q5U649	CL060_HUMAN	Uncharacterized protein C12orf60		Ace|R(1)	34	665.825	2
	-	M	E	NatB	3	Ace(3)	Ace	MELLG	MELLGEYVGQEGKPQKLR	R	100	100	0						1.37158	0.455835	0.989181		1	18	Q9BXV9	CN142_HUMAN	Uncharacterized protein C14orf142		Ace|R(2), Ace|R<C13N15>(1)	71	1114.09	2
	-	M	I	NatC or other	1	Ace(1)	Ace	MISCA	MISCAEQR	R	100	N.D.	N.D.						N.D.				1	8	Q6ZUT6	CO052_HUMAN	Uncharacterized protein C15orf52		Ace|R(1)	36	526.729	2
	-	M	K	other	3	AcD3C13(3)	AcD3C13	MKMFE	MKMFESADSTATR	R	24	29	5						0.942467	-0.0854865	-0.342188		1	13	Q9BV29	CO057_HUMAN	Uncharacterized protein C15orf57		AcD3C13|R(2), AcD3C13|R<C13N15>(1)	75	800.868	2
	-	M	Y	NatC or other	2	AcD3C13(2)	AcD3C13	MYLQV	MYLQVETR	R	0	0	0						2.1875	1.12928	2.64551	99% siNatA	1	8	Q9BQA9	CQ062_HUMAN	Uncharacterized protein C17orf62		AcD3C13|R(1), AcD3C13|R<C13N15>(1)	45	551.781	2
	-	M	I	NatC or other	1	Ace(1)	Ace	MITET	MITETAAEPTVPAVPAAEEATEAR	R	N.D.	N.D.	N.D.						N.D.				1	24	Q96EN9	CS060_HUMAN	Uncharacterized protein C19orf60		Ace|R(1)	69	838.408	3
	M	A	S	NatA	2	Ace(2)	Ace	ASMAA	ASMAAAIAASR	R<C13N15>	100	100	0						1.1841	0.243791	0.467662		2	12	Q9H425	CA198_HUMAN	Uncharacterized protein C1orf198		Ace|R(1), Ace|R<C13N15>(1)	86	544.276	2
	-	M	E	NatB	2	Ace(2)	Ace	MEDAA	MEDAAAPGR	R<C13N15>	100	100	0						0.93782	-0.092617	-0.359726		1	9	Q9BV19	CA050_HUMAN	Uncharacterized protein C1orf50		Ace|R(1), Ace|R<C13N15>(1)	70	493.218	2
	M	G	V	NatA	1	AcD3C13(1)	AcD3C13	GVSKL	GVSKLDILYR	R	N.D.	N.D.	N.D.						N.D.				2	11	Q0P651	CD029_HUMAN	Uncharacterized protein C4orf29		AcD3C13|R(1)	33	629.38	2
	-	M	E	NatB	2	Ace(2)	Ace	MEVDA	MEVDAPGVDGR	R	100	100	0						2.64664	1.40416	3.32157	99% siNatA	1	11	Q8WVX3	CD003_HUMAN	Uncharacterized protein C4orf3		Ace|R(1), Ace|R<C13N15>(1)	62	602.269	2
	M	S	S	NatA	2	Ace(2)	Ace	SSQKG	SSQKGNVAR	R	99.9989	99.6143	-0.384562						0.85208	-0.230939	-0.699926		2	10	Q96MD7	CI085_HUMAN	Uncharacterized protein C9orf85		Ace|R<C13N15>(1), Ace|R(1)	46	518.28	2
	-	M	N	NatB or other	1	Ace(1)	Ace	MNEVK	MNEVKESLR	R<C13N15>	100	100	0						N.D.				1	9	Q96E40	CI009_HUMAN	Uncharacterized protein C9orf9		Ace|R<C13N15>(1)	54	610.812	2
	-	M	V	other	4	AcD3C13(2), Ace(2)	AcD3C13	MVLSE	MVLSELAAR	R	35	46	11	√					1.18675	0.247012	0.475586		1	9	Q8TB03	CX038_HUMAN	Uncharacterized protein CXorf38		AcD3C13|R(1), AcD3C13|R<C13N15>(1), Ace|R(1), Ace|R<C13N15>(1)	73	526.792	2
	M	V	L	NatA	3	AcD3C13(3)	AcD3C13	VLSEL	VLSELAAR	R<C13N15>	0	5	5	√					1.22176	0.288958	0.578749		2	9	Q8TB03	CX038_HUMAN	Uncharacterized protein CXorf38		AcD3C13|R(2), AcD3C13|R<C13N15>(1)	69	458.278	2
	M	S	V	NatA	3	Ace(3)	Ace	SVKEA	SVKEAGSSGR	R	99.9723	100	0.0276867						0.98771	-0.0178406	-0.175815		2	11	Q13459	MYO9B_HUMAN	Unconventional myosin-IXb		Ace|R(2), Ace|R<C13N15>(1)	65	533.777	2
	M	A	A	NatA	2	Ace(2)	Ace	AASEL	AASELYTKFAR	R	100	100	0						1.07186	0.100116	0.114298		2	12	Q9Y4I1	MYO5A_HUMAN	Unconventional myosin-Va		Ace|R(1), Ace|R<C13N15>(1)	43	673.358	2
	-	M	D	NatB	2	Ace(2)	Ace	MDNFF	MDNFFTEGTR	R<C13N15>	100	100	0						2.64142	1.40131	3.31457	99% siNatA	1	10	Q9HD67	MYO10_HUMAN	Unconventional myosin-X		Ace|R(1), Ace|R<C13N15>(1)	69	643.274	2
	-	M	E	NatB	2	Ace(2)	Ace	MEAPT	MEAPTVETPPDPSPPSAPAPALVPLR	R	100	100	0						0.96259	-0.0550067	-0.267224		1	26	O94763	RMP_HUMAN	Unconventional prefoldin RPB5 interactor 1		Ace|R(1), Ace|R<C13N15>(1)	83	899.127	3
	R	M	L	NatC or other	1	Ace(1)	Ace	MLGPE	MLGPESVPPPKR	R<C13N15>	100	100	0						1.18637	0.246554	0.474458		25	36	Q9HB07	MYG1_HUMAN	UPF0160 protein MYG1, mitochondrial		Ace|R<C13N15>(1)	40	711.886	2
	M	A	V	NatA	2	Ace(2)	Ace	AVVPA	AVVPASLSGQDVGSFAYLTIKDR	R	91	100	9	√					0.815501	-0.294241	-0.855616		2	24	Q9H993	CF211_HUMAN	UPF0364 protein C6orf211		Ace|R(1), Ace|R<C13N15>(1)	44	828.443	3
	M	G	S	NatA	1	Ace(1)	Ace	GSKAK	GSKAKKR	R<C13N15>	N.D.	100	N.D.						N.D.				2	8	Q9UFG5	CS025_HUMAN	UPF0449 protein C19orf25		Ace|R<C13N15>(1)	27	484.314	2
	M	S	Q	NatA	2	Ace(2)	Ace	SQEGV	SQEGVELEKSVR	R	100	100	0						1.57919	0.659185	1.48931		2	13	Q9NUL5	CS066_HUMAN	UPF0515 protein C19orf66		Ace|R(1), Ace|R<C13N15>(1)	85	725.381	2
	-	M	A	other	2	Ace(2)	Ace	MAPGE	MAPGEVTITVR	R<C13N15>	≥95	≥94	N.D.						0.87987	-0.184638	-0.586049		1	11	Q3KRA6	CB076_HUMAN	UPF0538 protein C2orf76		Ace|R<C13N15>(1), Ace|R(1)	59	621.325	2
	M	A	P	none	2	AcD3C13(2)	AcD3C13	APGEV	APGEVTITVR	R<C13N15>	0	0	0						1.01264	0.0181189	-0.0873732		2	11	Q3KRA6	CB076_HUMAN	UPF0538 protein C2orf76		AcD3C13|R<C13N15>(1), AcD3C13|R(1)	83	550.32	2
	-	M	D	NatB	4	Ace(4)	Ace	MDGLL	MDGLLNPR	R<C13N15>	100	100	0						0.8502	-0.234126	-0.707764		1	8	Q5T6V5	CI064_HUMAN	UPF0553 protein C9orf64		Ace|R(2), Ace|R<C13N15>(2)	63	492.246	2
	-	M	L	NatC or other	7	Ace(7)	Ace	MLVAA	MLVAAAAER	R	95	96	1						0.989953	-0.0145676	-0.167765		1	9	Q96S19	CP013_HUMAN	UPF0585 protein C16orf13		Ace|R<C13N15>(3), Ace|R(4)	93	495.258	2
	M	A	A	NatA	4	Ace(4)	Ace	AAAVS	AAAVSSVVR	R	99.9986	99.6	-0.398554						0.76588	-0.38481	-1.07837		2	10	A6NDU8	CE051_HUMAN	UPF0600 protein C5orf51		Ace|R<C13N15>(2), Ace|R(2)	98	451.259	2
	-	M	V	other	2	Ace(2)	Ace	MVGGG	MVGGGGKR	R	100	100	0						1.1577	0.211261	0.387657		1	8	Q9NWY4	CD027_HUMAN	UPF0609 protein C4orf27		Ace|R<C13N15>(1), Ace|R(1)	65	433.729	2
	M	V	G	NatA	2	AcD3C13(2)	AcD3C13	VGGGG	VGGGGKR	R<C13N15>	0	0	0						1.00475	0.00683658	-0.115122		2	8	Q9NWY4	CD027_HUMAN	UPF0609 protein C4orf27		AcD3C13|R(1), AcD3C13|R<C13N15>(1)	42	367.728	2
	M	A	A	NatA	5	Ace(5)	Ace	AAANK	AAANKGNKPR	R<C13N15>	100	100	0						0.69496	-0.524998	-1.42316		2	11	Q9GZN8	CT027_HUMAN	UPF0687 protein C20orf27		Ace|R(3), Ace|R<C13N15>(2)	64	586.839	2
	M	A	T	NatA	2	Ace(2)	Ace	ATGTP	ATGTPESQAR	R<C13N15>	100	100	0						0.74382	-0.426975	-1.18207		2	11	Q96B45	CJ032_HUMAN	UPF0693 protein C10orf32		Ace|R<C13N15>(1), Ace|R(1)	65	535.261	2
	-	M	E	NatB	1	Ace(1)	Ace	MEPGE	MEPGEELEEEGSPGGR	R	100	100	0						1.2664	0.340733	0.70609		1	16	Q9H3H3	CK068_HUMAN	UPF0696 protein C11orf68		Ace|R(1)	26	880.868	2
	M	A	A	NatA	1	Ace(1)	Ace	AATGA	AATGANAEKAESHNDCPVR	R<C13N15>	100	100	0						N.D.				2	20	Q16831	UPP1_HUMAN	Uridine phosphorylase 1		Ace|R<C13N15>(1)	47	699.659	3
	-	M	E	NatB	12	Ace(12)	Ace	MEANG	MEANGLGPQGFPELKNDTFLR	R	100	100	0						0.820515	-0.285398	-0.833867		1	21	P06132	DCUP_HUMAN	Uroporphyrinogen decarboxylase		Ace|R<C13N15>(6), Ace|R(6)	95	1220.1	2
	-	M	N	NatB or other	2	Ace(2)	Ace	MNSDQ	MNSDQDVALKLAQER	R	100	100	0						1.38547	0.470375	1.02494		1	15	Q92738	US6NL_HUMAN	USP6 N-terminal-like protein		Ace|R(1), Ace|R<C13N15>(1)	94	911.952	2
	-	M	K	other	4	Ace(4)	Ace	MKSLK	MKSLKSR	R<C13N15>	100	100	0						1.12601	0.171226	0.289191		1	7	Q9BZF9	UACA_HUMAN	Uveal autoantigen with coiled-coil domains and ankyrin repeats		Ace|R(2), Ace|R<C13N15>(2)	45	506.295	2
	-	M	E	NatB	2	Ace(2)	Ace	MEVGG	MEVGGDTAAPAPGGAEDLEDTQFPSEEAR	R	100	100	0						1.19725	0.259724	0.506851		1	29	Q7L1V2	MON1B_HUMAN	Vacuolar fusion protein MON1 homolog B		Ace|R<C13N15>(1), Ace|R(1)	68	1002.44	3
	M	A	S	NatA	2	Ace(2)	Ace	ASILD	ASILDEYENSLSR	R<C13N15>	100	100	0						1.05331	0.0749301	0.0523529		2	14	Q9P253	VPS18_HUMAN	Vacuolar protein sorting-associated protein 18 homolog		Ace|R(1), Ace|R<C13N15>(1)	99	774.874	2
	M	A	A	NatA	3	Ace(3)	Ace	AAAAA	AAAAAAGPSPGSGPGDSPEGPEGEAPER	R	100	100	0						0.815587	-0.29409	-0.855244		2	29	Q9UID3	VPS51_HUMAN	Vacuolar protein sorting-associated protein 51 homolog		Ace|R(2), Ace|R<C13N15>(1)	74	844.381	3
	M	A	A	NatA	3	Ace(3)	Ace	AAAAT	AAAATMAAAAR	R<C13N15>	100	100	0						0.91756	-0.124126	-0.43722		2	12	Q8N1B4	VPS52_HUMAN	Vacuolar protein sorting-associated protein 52 homolog		Ace|R(1), Ace|R<C13N15>(2)	96	522.262	2
	M	S	E	NatA	4	Ace(4)	Ace	SETVI	SETVICSSR	R	100	100	0						1.20055	0.263695	0.516617		2	10	P50552	VASP_HUMAN	Vasodilator-stimulated phosphoprotein		Ace|R<C13N15>(2), Ace|R(2)	62	540.753	2
	M	A	A	NatA	2	AcD3C13(2)	AcD3C13	AAVAA	AAVAATAAAKGNGGGGGR	R	17	23	6						1.61553	0.692008	1.57004		2	19	Q6Y1H2	HACD2_HUMAN	Very-long-chain (3R)-3-hydroxyacyl-[acyl-carrier protein] dehydratase 2		AcD3C13|R(2)	134	775.921	2
	-	M	D	NatB	6	Ace(6)	Ace	MDKLK	MDKLKKVLSGQDTEDR	R	100	100	0						0.833937	-0.26199	-0.776296		1	16	O95562	SFT2B_HUMAN	Vesicle transport protein SFT2B		Ace|R(3), Ace|R<C13N15>(3)	108	1031.54	2
	M	S	A	NatA	1	Ace(1)	Ace	SATAA	SATAATAPPAAPAGEGGPPAPPPNLTSNR	R	N.D.	99.537	N.D.						1.26656	0.340915	0.706538		2	30	P63027	VAMP2_HUMAN	Vesicle-associated membrane protein 2		Ace|R(1)	51	894.116	3
	M	S	T	NatA	4	Ace(4)	Ace	STGPT	STGPTAATGSNR	R	100	100	0						1.30534	0.384426	0.813551		2	13	Q15836	VAMP3_HUMAN	Vesicle-associated membrane protein 3		Ace|R(2), Ace|R<C13N15>(2)	92	581.278	2
	M	S	M	NatA	2	Ace(2)	Ace	SMILS	SMILSASVIR	R	100	100	0						1.20915	0.273993	0.541944		2	11	Q96IW7	SC22A_HUMAN	Vesicle-trafficking protein SEC22a		Ace|R(1), Ace|R<C13N15>(1)	81	567.813	2
	M	A	V	NatA	1	Ace(1)	Ace	AVPPT	AVPPTYADLGKSAR	R	93	100	7	√					1.27042	0.345308	0.717343		2	15	P21796	VDAC1_HUMAN	Voltage-dependent anion-selective channel protein 1		Ace|R(1)	51	767.914	2
	-	M	Y	NatC or other	4	AcD3C13(2), Ace(2)	AcD3C13	MYPES	MYPESTTGSPAR	R<C13N15>	44	43	-1						1.30351	0.382402	0.808573		1	12	Q13303	KCAB2_HUMAN	Voltage-gated potassium channel subunit beta-2		AcD3C13|R(1), AcD3C13|R<C13N15>(1), Ace|R(1), Ace|R<C13N15>(1)	80	685.317	2
	M	A	S	NatA	5	Ace(5)	Ace	ASQSQ	ASQSQGIQQLLQAEKR	R	100	100	0						1.14917	0.20059	0.36141		2	17	O75348	VATG1_HUMAN	V-type proton ATPase subunit G 1	O95670 (2-17)	Ace|R(2), Ace|R<C13N15>(3)	122	937.509	2
	-	M	D	NatB	2	Ace(2)	Ace	MDEDG	MDEDGLPLMGSGIDLTKVPAIQQKR	R	100	100	0						0.92069	-0.119213	-0.425137		1	25	Q9Y3C0	CCD53_HUMAN	WASH complex subunit CCDC53		Ace|R(1), Ace|R<C13N15>(1)	60	960.832	3
	M	A	A	NatA	2	Ace(2)	Ace	AAEIQ	AAEIQPKPLTR	R	99.6206	99.9999	0.379286						0.97979	-0.0294555	-0.204381		2	12	Q96P53	WDFY2_HUMAN	WD repeat and FYVE domain-containing protein 2		Ace|R<C13N15>(1), Ace|R(1)	44	656.882	2
	-	M	T	other	2	Ace(2)	Ace	MTQQP	MTQQPLR	R	82	100	18	√					1.22477	0.292512	0.58749		1	7	Q9Y484	WIPI4_HUMAN	WD repeat domain phosphoinositide-interacting protein 4		Ace|R<C13N15>(1), Ace|R(1)	35	466.237	2
	R	M	E	NatB	2	Ace(2)	Ace	MEDFE	MEDFEDDPR	R	100	100	0						1.2251	0.2929	0.588444		93	101	Q9H1Z4	WDR13_HUMAN	WD repeat-containing protein 13		Ace|R(1), Ace|R<C13N15>(1)	69	606.23	2
	M	A	T	NatA	1	Ace(1)	Ace	ATEGG	ATEGGGKEMNEIKTQFTTR	R	100	100	0						0.88501	-0.176234	-0.565381		2	20	Q8TBZ3	WDR20_HUMAN	WD repeat-containing protein 20		Ace|R(1)	40	750.706	3
	M	G	L	NatA	7	AcD3C13(7)	AcD3C13	GLTKQ	GLTKQYLR	R	0	0	0						0.971843	-0.041205	-0.233279		2	9	Q9UNX4	WDR3_HUMAN	WD repeat-containing protein 3		AcD3C13|R(4), AcD3C13|R<C13N15>(3)	57	536.826	2
	M	P	T	none	2	AcD3C13(2)	AcD3C13	PTESA	PTESASCSTAR	R	0	0	0						1.42686	0.512844	1.12939		2	12	Q9Y2I8	WDR37_HUMAN	WD repeat-containing protein 37		AcD3C13|R(1), AcD3C13|R<C13N15>(1)	65	607.277	2
	-	M	E	NatB	1	Ace(1)	Ace	METAP	METAPKPGKDVPPKKDKLQTKR	R	99.7137	99.7447	0.0309962						0.71239	-0.489261	-1.33526		1	22	O15213	WDR46_HUMAN	WD repeat-containing protein 46		Ace|R(1)	40	944.88	3
	M	A	T	NatA	6	Ace(4), AcD3C13(2)	Ace	ATEEK	ATEEKKPETEAAR	R	59	100	41	√			√		1.07877	0.109393	0.137115		2	14	P61964	WDR5_HUMAN	WD repeat-containing protein 5		Ace|R<C13N15>(2), Ace|R(2), AcD3C13|R(2)	72	798.415	2
	M	A	A	NatA	1	Ace(1)	Ace	AAVGS	AAVGSGGYAR	R	100	100	0						0.88014	-0.184195	-0.58496		2	11	O43379	WDR62_HUMAN	WD repeat-containing protein 62		Ace|R(1)	58	475.738	2
	-	M	V	other	4	Ace(4)	Ace	MVEEE	MVEEENIR	R<C13N15>	100	100	0						0.773725	-0.370107	-1.04221		1	8	Q8IWA0	WDR75_HUMAN	WD repeat-containing protein 75		Ace|R(2), Ace|R<C13N15>(2)	44	544.252	2
	M	V	E	NatA	4	AcD3C13(2), Ace(2)	AcD3C13	VEEEN	VEEENIR	R<C13N15>	34	64	30	√					0.835691	-0.258958	-0.768838		2	8	Q8IWA0	WDR75_HUMAN	WD repeat-containing protein 75		AcD3C13|R(1), AcD3C13|R<C13N15>(1), Ace|R<C13N15>(1), Ace|R(1)	49	473.247	2
	-	M	K	other	6	AcD3C13(4), Ace(2)	AcD3C13	MKLTD	MKLTDSVLR	R<C13N15>	4	3	-1						1.23929	0.309514	0.629307		1	9	Q6UXN9	WDR82_HUMAN	WD repeat-containing protein 82		AcD3C13|R(2), AcD3C13|R<C13N15>(2), Ace|R(2)	72	591.84	2
	M	A	E	NatA	1	Ace(1)	Ace	AEAVE	AEAVER	R<C13N15>	100	100	0						0.89353	-0.162412	-0.531385		2	7	A4D1P6	WDR91_HUMAN	WD repeat-containing protein 91		Ace|R<C13N15>(1)	42	363.686	2
	-	M	E	NatB	3	Ace(3)	Ace	MELGK	MELGKGKLLR	R<C13N15>	100	100	0						0.96063	-0.0579472	-0.274456		1	10	Q9H6R7	CB044_HUMAN	WD repeat-containing protein C2orf44		Ace|R(2), Ace|R<C13N15>(1)	67	653.89	2
	-	M	S	other	1	Ace(1)	Ace	MSIEI	MSIEIESSDVIR	R<C13N15>	100	100	0						0.5936	-0.752437	-1.98254		1	12	Q2TAY7	SMU1_HUMAN	WD40 repeat-containing protein SMU1		Ace|R<C13N15>(1)	60	723.855	2
	M	S	I	NatA	10	Ace(10)	Ace	SIEIE	SIEIESSDVIR	R<C13N15>	100	100	0						1.15483	0.207685	0.378862		2	12	Q2TAY7	SMU1_HUMAN	WD40 repeat-containing protein SMU1		Ace|R(4), Ace|R<C13N15>(6)	104	650.337	2
	M	S	E	NatA	1	Ace(1)	Ace	SEKKL	SEKKLETTAQQR	R	100	100	0						0.64867	-0.624443	-1.66774		2	13	Q14191	WRN_HUMAN	Werner syndrome ATP-dependent helicase		Ace|R(1)	35	777.925	2
	M	P	P	none	4	AcD3C13(4)	AcD3C13	PPKVT	PPKVTSELLR	R<C13N15>	0	0	0						0.865478	-0.208432	-0.64457		2	11	Q9NQW7	XPP1_HUMAN	Xaa-Pro aminopeptidase 1		AcD3C13|R(2), AcD3C13|R<C13N15>(2)	69	622.384	2
	-	M	E	NatB	1	Ace(1)	Ace	MEGDF	MEGDFSVCR	R	100	100	0						5.54001	2.46989	5.9427	99% siNatA	1	9	Q6GPH4	XAF1_HUMAN	XIAP-associated factor 1		Ace|R(1)	63	579.731	2
	M	S	A	NatA	4	Ace(4)	Ace	SATSV	SATSVDTQR	R<C13N15>	100	100	0						0.91407	-0.129623	-0.450742		2	10	Q9BYJ9	YTHD1_HUMAN	YTH domain family protein 1		Ace|R(2), Ace|R<C13N15>(2)	68	508.747	2
	M	S	A	NatA	2	Ace(2)	Ace	SASSL	SASSLLEQR	R<C13N15>	100	100	0						1.01837	0.0262618	-0.0673457		2	10	Q9Y5A9	YTHD2_HUMAN	YTH domain family protein 2		Ace|R<C13N15>(1), Ace|R(1)	52	521.774	2
	M	S	A	NatA	2	Ace(2)	Ace	SATSV	SATSVDQR	R<C13N15>	100	100	0						0.68426	-0.547383	-1.47821		2	9	Q7Z739	YTHD3_HUMAN	YTH domain family protein 3		Ace|R<C13N15>(1), Ace|R(1)	64	458.224	2
	-	M	E	NatB	1	Ace(1)	Ace	MELPN	MELPNYSR	R<C13N15>	100	100	0						1.33433	0.416116	0.891491		1	8	Q9NUA8	ZBT40_HUMAN	Zinc finger and BTB domain-containing protein 40		Ace|R<C13N15>(1)	37	539.249	2
	-	M	E	NatB	2	Ace(2)	Ace	MEPGT	MEPGTNSFR	R	100	100	0						1.13644	0.184522	0.321891		1	9	O43298	ZBT43_HUMAN	Zinc finger and BTB domain-containing protein 43		Ace|R(1), Ace|R<C13N15>(1)	52	548.74	2
	-	M	E	NatB	3	Ace(3)	Ace	MEIGT	MEIGTEISR	R	100	100	0						0.98719	-0.0186003	-0.177683		1	9	Q6PJT7	ZC3HE_HUMAN	Zinc finger CCCH domain-containing protein 14		Ace|R(2), Ace|R<C13N15>(1)	79	547.263	2
	-	M	E	NatB	3	Ace(3)	Ace	MEEKE	MEEKEILR	R	100	100	0						N.D.				1	8	Q8IXZ2	ZC3H3_HUMAN	Zinc finger CCCH domain-containing protein 3		Ace|R<C13N15>(1), Ace|R(2)	44	576.8	2
	-	M	D	NatB	2	Ace(2)	Ace	MDEES	MDEESLESALQTYR	R	100	100	0						1.20104	0.264289	0.518078		1	14	Q8N5A5	ZGPAT_HUMAN	Zinc finger CCCH-type with G patch domain-containing protein		Ace|R(1), Ace|R<C13N15>(1)	88	865.382	2
	-	M	V	other	2	AcD3C13(2)	AcD3C13	MVEKK	MVEKKTSVR	R	N.D.	N.D.	N.D.						N.D.				1	9	O43257	ZNHI1_HUMAN	Zinc finger HIT domain-containing protein 1		AcD3C13|R(1), AcD3C13|R<C13N15>(1)	52	617.86	2
	M	V	E	NatA	3	AcD3C13(3)	AcD3C13	VEKKT	VEKKTSVR	R	N.D.	N.D.	N.D.						N.D.				2	9	O43257	ZNHI1_HUMAN	Zinc finger HIT domain-containing protein 1		AcD3C13|R<C13N15>(1), AcD3C13|R(2)	60	544.347	2
	-	M	E	NatB	2	Ace(2)	Ace	MEPAG	MEPAGPCGFCPAGEVQPAR	R<C13N15>	100	100	0						1.01251	0.0179362	-0.0878225		1	19	Q9UHR6	ZNHI2_HUMAN	Zinc finger HIT domain-containing protein 2		Ace|R<C13N15>(1), Ace|R(1)	63	1049.95	2
	M	A	S	NatA	2	Ace(2)	Ace	ASGSG	ASGSGTKNLDFR	R<C13N15>	100	100	0						1.21501	0.280968	0.559099		2	13	Q96NC0	ZMAT2_HUMAN	Zinc finger matrin-type protein 2		Ace|R(1), Ace|R<C13N15>(1)	66	676.345	2
	M	S	Q	NatA	1	Ace(1)	Ace	SQGSV	SQGSVTFR	R<C13N15>	100	100	0						0.45885	-1.12391	-2.89616	99% siCTR	2	9	P52738	ZN140_HUMAN	Zinc finger protein 140		Ace|R<C13N15>(1)	38	467.237	2
	-	M	L	NatC or other	2	Ace(2)	Ace	MLLAQ	MLLAQINR	R	100	100	0						1.14681	0.197626	0.354122		1	8	P52747	ZN143_HUMAN	Zinc finger protein 143		Ace|R(1), Ace|R<C13N15>(1)	62	508.781	2
	M	A	A	NatA	1	Ace(1)	Ace	AASKT	AASKTQGAVAR	R	100	100	0						0.61975	-0.690242	-1.82957		2	12	Q9NRM2	ZN277_HUMAN	Zinc finger protein 277		Ace|R(1)	67	574.822	2
	M	A	L	NatA	1	Ace(1)	Ace	ALSQG	ALSQGLLTFR	R<C13N15>	100	100	0						0.71858	-0.476779	-1.30456		2	11	A2RRD8	ZN320_HUMAN	Zinc finger protein 320	Q96IR2 (2-11)	Ace|R<C13N15>(1)	46	579.331	2
	M	P	K	none	2	AcD3C13(2)	AcD3C13	PKKKT	PKKKTGAR	R<C13N15>	0	0	0						0.79528	-0.330465	-0.944708		2	9	Q9Y3S2	ZN330_HUMAN	Zinc finger protein 330		AcD3C13|R(1), AcD3C13|R<C13N15>(1)	62	542.361	2
	-	M	I	NatC or other	2	Ace(2)	Ace	MILGS	MILGSLSR	R	100	100	0						3.44206	1.78327	4.25398	99% siNatA	1	8	Q96PM9	Z385A_HUMAN	Zinc finger protein 385A		Ace|R<C13N15>(1), Ace|R(1)	47	467.755	2
	-	M	Q	NatB or other	1	Ace(1)	Ace	MQLPP	MQLPPALCAR	R	N.D.	71	N.D.						N.D.				1	10	Q8NB15	ZN511_HUMAN	Zinc finger protein 511		Ace|R(1)	32	607.805	2
	M	A	T	NatA	1	Ace(1)	Ace	ATYTC	ATYTCITCR	R<C13N15>	N.D.	93	N.D.						N.D.				2	10	Q969S3	ZN622_HUMAN	Zinc finger protein 622		Ace|R<C13N15>(1)	44	599.266	2
	-	M	N	NatB or other	2	Ace(2)	Ace	MNEYP	MNEYPKKR	R	100	100	0						1.1225	0.166715	0.278097		1	8	Q9UID6	ZN639_HUMAN	Zinc finger protein 639		Ace|R(1), Ace|R<C13N15>(1)	36	609.318	2
	-	M	E	NatB	2	Ace(2)	Ace	MEEIP	MEEIPAQEAAGSPR	R<C13N15>	100	100	0						0.88191	-0.181297	-0.577831		1	14	Q8N720	ZN655_HUMAN	Zinc finger protein 655		Ace|R<C13N15>(1), Ace|R(1)	62	777.361	2
	-	M	E	NatB	2	Ace(2)	Ace	MEVEA	MEVEAAEAR	R	100	100	0						1.16812	0.224188	0.419451		1	9	Q96K58	ZN668_HUMAN	Zinc finger protein 668		Ace|R(1), Ace|R<C13N15>(1)	68	532.24	2
	-	M	D	NatB	1	Ace(1)	Ace	MDPED	MDPEDEGVAGVMSVGPPAAR	R	100	100	0						0.82824	-0.271879	-0.800617		1	20	P17098	ZNF8_HUMAN	Zinc finger protein 8		Ace|R(1)	35	1029.96	2
	M	A	A	NatA	2	Ace(2)	Ace	AAAIT	AAAITDMADLEELSR	R	100	100	0						0.59071	-0.759478	-1.99986		2	16	Q6ZN18	AEBP2_HUMAN	Zinc finger protein AEBP2		Ace|R<C13N15>(1), Ace|R(1)	87	832.396	2
	-	M	D	NatB	2	Ace(2)	Ace	MDLGT	MDLGTAEGTR	R	100	100	0						1.37288	0.457207	0.992555		1	10	Q86V15	CASZ1_HUMAN	Zinc finger protein castor homolog 1		Ace|R(1), Ace|R<C13N15>(1)	87	554.751	2
	M	G	L	NatA	1	AcD3C13(1)	AcD3C13	GLCKC	GLCKCPKR	R	0	0	0						1.33236	0.413984	0.886249		2	9	O95159	ZFPL1_HUMAN	Zinc finger protein-like 1		AcD3C13|R(1)	40	580.322	2
	M	S	T	NatA	2	Ace(2)	Ace	STKNF	STKNFR	R	100	100	0						0.94354	-0.0838444	-0.33815		2	7	O95218	ZRAB2_HUMAN	Zinc finger Ran-binding domain-containing protein 2	Q9GZN7 (213-218)	Ace|R<C13N15>(1), Ace|R(1)	45	421.23	2
	M	S	M	NatA	2	Ace(2)	Ace	SMDVT	SMDVTFLGTGAAYPSPTR	R<C13N15>	100	100	0						0.84322	-0.246019	-0.737015		2	19	Q9H777	RNZ1_HUMAN	Zinc phosphodiesterase ELAC protein 1		Ace|R<C13N15>(1), Ace|R(1)	50	969.961	2

## Sheet: Table S2
	P1 (if any)	P1'	P2'	NAT type	MS2 spectra	N-term mods (MS2 spectra)	N-term HS	P1'-P5'	Sequence	C-term HS	NTA siNatA corr (%)	NTA siCTR corr (%)	∆ NTA	siNatA-affected substrate A-431 (this study)	S37P B-cells	S37P fibroblasts	siNatA HeLa	NAA15 --/+, KO affected substrate	N-term ratio corr	log2 ratio	Significance	Significant (setup)	Start	Stop	Accession	UNIPROT	Description	Isoforms	N- and C-term (MS2 spectra)	Mascot highest score (HS)	precursor HS	charge HS
	M	A	A	NatA	1	Ace(1)	Ace	AAGCS	AAGCSEAPR	R<C13N15>	23	100	77	√					1.18725	0.24762	0.47708		2	10	Q3B726	RPA43_HUMAN	DNA-directed RNA polymerase I subunit RPA43		Ace|R<C13N15>(1)	63	485.717	2
	M	A	A	NatA	2	AcD3C13(1), Ace(1)	AcD3C13	AAAEE	AAAEEEDGGPEGPNR	R	37	93	56	√	√	√			1.55824	0.639916	1.44192		2	16	Q99942	RNF5_HUMAN	E3 ubiquitin-protein ligase RNF5		AcD3C13|R(1), Ace|R(1)	80	773.342	2
	M	A	G	NatA	2	Ace(1), AcD3C13(1)	AcD3C13	AGPLQ	AGPLQGGGAR	R	40	91	51	√	√	√			0.676056	-0.564785	-1.52101		2	11	Q9P015	RM15_HUMAN	39S ribosomal protein L15, mitochondrial		Ace|R<C13N15>(1), AcD3C13|R(1)	66	465.759	2
	M	A	A	NatA	3	Ace(2), AcD3C13(1)	AcD3C13	AAGGS	AAGGSGVGGKR	R	28	79	51	√				√	0.469837	-1.08977	-2.8122	99% siCTR	2	12	Q9NZM5	GSCR2_HUMAN	Glioma tumor suppressor candidate region gene 2 protein		Ace|R<C13N15>(1), AcD3C13|R(1), Ace|R(1)	97	505.788	2
	M	G	S	NatA	1	Ace(1)	Ace	GSEAA	GSEAAQLLEAADFAAR	R<C13N15>	49.4172	100	50.5828	√					0.43159	-1.21227	-3.11348	99% siCTR	2	17	Q8N4P3	MESH1_HUMAN	Guanosine-3',5'-bis(diphosphate) 3'-pyrophosphohydrolase MESH1		Ace|R<C13N15>(1)	82	836.416	2
	M	T	N	NatA	3	AcD3C13(1), Ace(2)	AcD3C13	TNEEP	TNEEPLPKKVR	R	35	85	50	√					0.878968	-0.186117	-0.589687		2	12	Q15007	FL2D_HUMAN	Pre-mRNA-splicing regulator WTAP		AcD3C13|R(1), Ace|R<C13N15>(1), Ace|R(1)	49	726.429	2
	M	A	K	NatA	7	AcD3C13(4), Ace(3)	Ace	AKEEP	AKEEPQSISR	R	36	85	49	√					1.54168	0.624504	1.40402		2	11	Q96B96	TM159_HUMAN	Promethin		AcD3C13|R(2), Ace|R(2), AcD3C13|R<C13N15>(2), Ace|R<C13N15>(1)	54	617.325	2
	M	A	Q	NatA	4	Ace(3), AcD3C13(1)	AcD3C13	AQPGT	AQPGTLNLNNEVVKMR	R	51.4208	100	48.5792	√	√				0.72451	-0.464923	-1.2754		2	17	Q8NEF9	SRFB1_HUMAN	Serum response factor-binding protein 1		Ace|R<C13N15>(2), AcD3C13|R(1), Ace|R(1)	72	947.512	2
	M	S	E	NatA	2	Ace(2)	Ace	SETAP	SETAPAAPAAPAPAEKTPVKKKAR	R	52	100	48	√				√	0.918306	-0.122954	-0.434338		2	25	P10412	H14_HUMAN	Histone H1.4		Ace|R(2)	90	1309.75	2
	M	T	E	NatA	2	AcD3C13(1), Ace(1)	AcD3C13	TENST	TENSTSAPAAKPKR	R	15	61	46	√					1.16329	0.218207	0.404739		2	15	P07305	H10_HUMAN	Histone H1.0		AcD3C13|R(1), Ace|R(1)	84	799.943	2
	M	S	A	NatA	3	Ace(2), AcD3C13(1)	AcD3C13	SASVV	SASVVSVISR	R	34	79	45	√	√	√			1.3782	0.462783	1.00627		2	11	P61803	DAD1_HUMAN	Dolichyl-diphosphooligosaccharide--protein glycosyltransferase subunit DAD1		Ace|R<C13N15>(1), AcD3C13|R(1), Ace|R(1)	54	526.308	2
	M	A	A	NatA	1	Ace(1)	Ace	AASGV	AASGVEKSSKKKTEKKLAAR	R	55	100	45	√				√	0.670379	-0.576952	-1.55094		2	21	Q8IXQ5	KLHL7_HUMAN	Kelch-like protein 7		Ace|R(1)	37	814.83	3
	M	G	T	NatA	2	Ace(2)	Ace	GTALD	GTALDIKIKR	R<C13N15>	56	100	44	√					1.15772	0.211291	0.387729		2	11	O14972	DSCR3_HUMAN	Down syndrome critical region protein 3		Ace|R<C13N15>(1), Ace|R(1)	56	630.896	2
	M	S	E	NatA	1	Ace(1)	Ace	SETAP	SETAPAETATPAPVEKSPAKKKATKKAAGAGAAKR	R<C13N15>	56	100	44	√				√	0.753197	-0.408901	-1.13762		2	36	P16401	H15_HUMAN	Histone H1.5		Ace|R<C13N15>(1)	45	1268.07	3
	M	A	A	NatA	2	AcD3C13(1), Ace(1)	AcD3C13	AADTQ	AADTQVSETLKR	R	38	82	44	√	√	√	√	√	0.893356	-0.162693	-0.532077		2	13	Q92616	GCN1L_HUMAN	Translational activator GCN1		AcD3C13|R(1), Ace|R<C13N15>(1)	68	706.888	2
	M	A	K	NatA	3	Ace(2), AcD3C13(1)	AcD3C13	AKSNG	AKSNGENGPR	R	54.7459	98.3946	43.6487	√					0.65052	-0.620335	-1.65764		2	11	Q9BXI6	TB10A_HUMAN	TBC1 domain family member 10A		Ace|R<C13N15>(1), AcD3C13|R(1), Ace|R(1)	65	562.293	2
	M	S	E	NatA	1	Ace(1)	Ace	SETAP	SETAPAAPAAAPPAEKAPVKKKAAKKAGGTPR	R<C13N15>	57	100	43	√				√	1.25065	0.322677	0.661682		2	33	P16403	H12_HUMAN	Histone H1.2		Ace|R<C13N15>(1)	23	1135	3
	M	A	G	NatA	2	AcD3C13(1), Ace(1)	Ace	AGGGA	AGGGAGDPGLGAAAAPAPETR	R<C13N15>	23	66	43	√		√			0.771949	-0.373423	-1.05036		2	22	Q13637	RAB32_HUMAN	Ras-related protein Rab-32		AcD3C13|R(1), Ace|R<C13N15>(1)	77	908.447	2
	M	A	A	NatA	1	Ace(1)	Ace	AAADA	AAADAEAVPAR	R<C13N15>	57.0796	99.5277	42.4481	√	√				1.28415	0.36081	0.755467		2	12	Q9H9B1	EHMT1_HUMAN	Histone-lysine N-methyltransferase EHMT1		Ace|R<C13N15>(1)	70	547.279	2
	M	A	A	NatA	1	Ace(1)	Ace	AAVDS	AAVDSDVESLPR	R	58	100	42	√					2.36426	1.24139	2.92123	99% siNatA	2	13	Q9H6E5	STPAP_HUMAN	Speckle targeted PIP5K1A-regulated poly(A) polymerase		Ace|R(1)	75	650.823	2
	M	A	T	NatA	6	Ace(4), AcD3C13(2)	Ace	ATEEK	ATEEKKPETEAAR	R	59	100	41	√			√		1.07877	0.109393	0.137115		2	14	P61964	WDR5_HUMAN	WD repeat-containing protein 5		Ace|R<C13N15>(2), Ace|R(2), AcD3C13|R(2)	72	798.415	2
	M	T	K	NatA	3	AcD3C13(1), Ace(2)	Ace	TKAGS	TKAGSKGGNLR	R	31	71	40	√	√	√		√	1.37567	0.460133	0.999751		2	12	Q96AG4	LRC59_HUMAN	Leucine-rich repeat-containing protein 59		AcD3C13|R(1), Ace|R<C13N15>(1), Ace|R(1)	81	612.854	2
	M	A	L	NatA	4	Ace(3), AcD3C13(1)	Ace	ALEGM	ALEGMSKR	R<C13N15>	57	97	40	√					1.16327	0.218191	0.4047		2	9	P42696	RBM34_HUMAN	RNA-binding protein 34		Ace|R(2), AcD3C13|R(1), Ace|R<C13N15>(1)	45	503.764	2
	M	G	S	NatA	3	AcD3C13(1), Ace(2)	Ace	GSSKK	GSSKKVTLSVLSR	R	41	80	39	√					1.05436	0.0763687	0.055891		2	14	O00625	PIR_HUMAN	Pirin		AcD3C13|R(1), Ace|R(1), Ace|R<C13N15>(1)	71	749.451	2
	M	A	G	NatA	3	AcD3C13(1), Ace(2)	Ace	AGPGP	AGPGPGAVLESPR	R<C13N15>	59	97	38	√					1.02355	0.0335765	-0.0493555		2	14	Q5T447	HECD3_HUMAN	E3 ubiquitin-protein ligase HECTD3		AcD3C13|R(1), Ace|R<C13N15>(1), Ace|R(1)	48	630.335	2
	M	A	G	NatA	2	AcD3C13(1), Ace(1)	Ace	AGTSA	AGTSAPGSKR	R	61	98	37	√					0.834104	-0.261701	-0.775584		2	11	Q8WXE1	ATRIP_HUMAN	ATR-interacting protein		AcD3C13|R(1), Ace|R(1)	41	510.775	2
	M	S	I	NatA	3	Ace(2), AcD3C13(1)	Ace	SIETL	SIETLLEAAR	R<C13N15>	63	100	37	√					1.40377	0.48931	1.07151		2	11	Q99583	MNT_HUMAN	Max-binding protein MNT		Ace|R(1), Ace|R<C13N15>(1), AcD3C13|R(1)	61	577.818	2
	M	A	V	NatA	4	AcD3C13(1), Ace(3)	Ace	AVFAD	AVFADLDLR	R	64	98	34	√	√	√	√		1.15113	0.203049	0.367458		2	10	P78346	RPP30_HUMAN	Ribonuclease P protein subunit p30		AcD3C13|R(1), Ace|R<C13N15>(2), Ace|R(1)	84	531.285	2
	M	A	A	NatA	2	AcD3C13(2)	AcD3C13	AAEKQ	AAEKQVPGGGGGGGSGGGGGSGGGGSGGGR	R	19	53	34	√					2.41205	1.27026	2.99224	99% siNatA	2	31	Q9UHB9	SRP68_HUMAN	Signal recognition particle subunit SRP68		AcD3C13|R(2)	156	1169.05	2
	M	A	G	NatA	4	Ace(2), AcD3C13(2)	AcD3C13	AGAGP	AGAGPKR	R	67	100	33	√					1.18817	0.248744	0.479844		2	8	Q01650	LAT1_HUMAN	Large neutral amino acids transporter small subunit 1	Q8MH63 (2-8), Q9GIP4 (2-8)	Ace|R<C13N15>(2), AcD3C13|R(2)	42	375.732	2
	M	A	A	NatA	7	Ace(5), AcD3C13(2)	Ace	AAGPI	AAGPISER	R<C13N15>	67	100	33	√					0.619238	-0.691433	-1.8325		2	9	Q15427	SF3B4_HUMAN	Splicing factor 3B subunit 4		Ace|R<C13N15>(3), AcD3C13|R(2), Ace|R(2)	59	426.726	2
	M	T	L	NatA	1	Ace(1)	Ace	TLEEF	TLEEFSAGEQKTER	R<C13N15>	43.3839	75.4579	32.0739	√					3.37729	1.75587	4.18658	99% siNatA	2	15	P24522	GA45A_HUMAN	Growth arrest and DNA damage-inducible protein GADD45 alpha		Ace|R<C13N15>(1)	48	862.422	2
	M	T	M	NatA	10	Ace(10)	Ace	TMDKS	TMDKSELVQKAKLAEQAER	R	68	100	32	√	√	√		√	1.21127	0.276518	0.548153		2	20	P31946	1433B_HUMAN	14-3-3 protein beta/alpha		Ace|R(7), Ace|R<C13N15>(3)	123	1187.63	2
	M	G	L	NatA	1	AcD3C13(1)	AcD3C13	GLYAA	GLYAAAAGVLAGVESR	R<C13N15>	0	32	32	√					0.891515	-0.16567	-0.539398		2	17	Q96P11	NSUN5_HUMAN	Putative methyltransferase NSUN5		AcD3C13|R<C13N15>(1)	116	781.432	2
	M	G	A	NatA	3	Ace(2), AcD3C13(1)	Ace	GAVTD	GAVTDDEVIR	R<C13N15>	64	96	32	√	√	√			0.670968	-0.575685	-1.54782		2	11	Q6I9Y2	THOC7_HUMAN	THO complex subunit 7 homolog		Ace|R<C13N15>(1), AcD3C13|R(1), Ace|R(1)	58	563.784	2
	M	T	E	NatA	4	Ace(2), AcD3C13(2)	Ace	TEESS	TEESSDVPR	R	62	93	31	√					1.29672	0.374867	0.790041		2	10	Q5VZK9	LR16A_HUMAN	Leucine-rich repeat-containing protein 16A		Ace|R<C13N15>(1), AcD3C13|R(1), Ace|R(1), AcD3C13|R<C13N15>(1)	41	531.241	2
	M	T	M	NatA	1	AcD3C13(1)	AcD3C13	TMEKG	TMEKGMSSGEGLPSR	R	15.1594	45.9459	30.7865	√					1.61051	0.687518	1.559		2	16	Q9H6P5	TASP1_HUMAN	Threonine aspartase 1		AcD3C13|R(1)	67	846.897	2
	M	V	E	NatA	4	AcD3C13(2), Ace(2)	AcD3C13	VEEEN	VEEENIR	R<C13N15>	34	64	30	√					0.835691	-0.258958	-0.768838		2	8	Q8IWA0	WDR75_HUMAN	WD repeat-containing protein 75		AcD3C13|R(1), AcD3C13|R<C13N15>(1), Ace|R<C13N15>(1), Ace|R(1)	49	473.247	2
	M	A	E	NatA	10	Ace(9), AcD3C13(1)	Ace	AEVQV	AEVQVLVLDGR	R<C13N15>	69	98	29	√	√	√	√	√	0.707493	-0.499213	-1.35974		2	12	P40429	RL13A_HUMAN	60S ribosomal protein L13a		Ace|R<C13N15>(6), AcD3C13|R(1), Ace|R(3)	75	625.853	2
	M	A	A	NatA	3	Ace(2), AcD3C13(1)	Ace	AAGGA	AAGGAVAAAPECR	R	71	100	29	√			√		0.776596	-0.364764	-1.02907		2	14	Q9UL63	MKLN1_HUMAN	Muskelin		Ace|R<C13N15>(1), AcD3C13|R(1), Ace|R(1)	57	621.798	2
	M	A	S	NatA	6	Ace(5), AcD3C13(1)	Ace	ASGAG	ASGAGGVGGGGGGKIR	R	71	100	29	√					0.702593	-0.50924	-1.3844		2	17	P49790	NU153_HUMAN	Nuclear pore complex protein Nup153		Ace|R<C13N15>(3), Ace|R(2), AcD3C13|R(1)	100	673.86	2
	M	A	G	NatA	3	Ace(2), AcD3C13(1)	Ace	AGQED	AGQEDPVQR	R	67	96	29	√					0.847761	-0.23827	-0.717957		2	10	Q8WUW1	BRK1_HUMAN	Protein BRICK1		Ace|R<C13N15>(1), Ace|R(1), AcD3C13|R(1)	60	521.252	2
	M	A	N	NatA	2	Ace(2)	Ace	ANDSG	ANDSGGPGGPSPSER	R<C13N15>	72	100	28	√					0.850323	-0.233918	-0.707252		2	16	Q9GZT9	EGLN1_HUMAN	Egl nine homolog 1		Ace|R<C13N15>(1), Ace|R(1)	86	718.817	2
	M	A	A	NatA	3	Ace(3)	Ace	AAAAG	AAAAGDGGGEGGAGLGSAAGLGPGPGLR	R	72	100	28	√					1.3349	0.416732	0.893007		2	29	Q9HCJ3	RAVR2_HUMAN	Ribonucleoprotein PTB-binding 2		Ace|R(2), Ace|R<C13N15>(1)	112	1132.06	2
	M	S	K	NatA	2	Ace(1), AcD3C13(1)	Ace	SKTNK	SKTNKSKSGSR	R	72	100	28	√					1.00795	0.0114228	-0.103842		2	12	Q9Y2W1	TR150_HUMAN	Thyroid hormone receptor-associated protein 3		Ace|R(1), AcD3C13|R(1)	70	681.885	2
	M	A	L	NatA	3	Ace(2), AcD3C13(1)	AcD3C13	ALQAD	ALQADFDR	R	73	100	27	√					1.38044	0.465131	1.01204		2	9	Q8N6N7	ACBD7_HUMAN	Acyl-CoA-binding domain-containing protein 7		Ace|R<C13N15>(1), Ace|R(1), AcD3C13|R(1)	61	491.751	2
	M	A	E	NatA	2	Ace(2)	Ace	AEGTA	AEGTAEAPLENGGGGDSGAGALER	R	73	100	27	√					0.78662	-0.346262	-0.98356		2	25	Q96G46	DUS3L_HUMAN	tRNA-dihydrouridine(47) synthase [NAD(P)(+)]-like		Ace|R<C13N15>(1), Ace|R(1)	93	1114.51	2
	M	S	E	NatA	1	Ace(1)	Ace	SETAP	SETAPLAPTIPAPAEKTPVKKKAKKAGATAGKR	R<C13N15>	74	100	26	√				√	0.724194	-0.465553	-1.27695		2	34	P16402	H13_HUMAN	Histone H1.3		Ace|R<C13N15>(1)	33	1232.74	3
	M	A	A	NatA	6	AcD3C13(4), Ace(2)	AcD3C13	AATAL	AATALLEAGLAR	R	25	50	25	√					1.23715	0.30702	0.623173		2	13	Q8WUK0	PTPM1_HUMAN	Phosphatidylglycerophosphatase and protein-tyrosine phosphatase 1		AcD3C13|R(2), AcD3C13|R<C13N15>(2), Ace|R<C13N15>(1), Ace|R(1)	89	602.356	2
	M	T	G	NatA	3	Ace(2), AcD3C13(1)	AcD3C13	TGKSV	TGKSVKDVDR	R	39	64	25	√					1.26053	0.334031	0.689606		2	11	Q8WU79	SMAP2_HUMAN	Stromal membrane-associated protein 2		Ace|R<C13N15>(1), AcD3C13|R(1), Ace|R(1)	62	623.358	2
	M	A	A	NatA	4	Ace(4)	Ace	AAAEE	AAAEEEPKPKKLKVEAPQALR	R	76	100	24	√					1.09327	0.128649	0.184473		2	22	P55263	ADK_HUMAN	Adenosine kinase		Ace|R(3), Ace|R<C13N15>(1)	69	845.16	3
	M	G	E	NatA	1	Ace(1)	Ace	GEQPI	GEQPIFSTR	R<C13N15>	69	93	24	√	√				0.875204	-0.192308	-0.604913		2	10	Q86YM7	HOME1_HUMAN	Homer protein homolog 1		Ace|R<C13N15>(1)	47	543.776	2
	M	G	E	NatA	2	Ace(2)	Ace	GEEAN	GEEANDDKKPTTKFELER	R	61	85	24	√					1.12046	0.164097	0.271657		2	19	Q92989	CLP1_HUMAN	Polyribonucleotide 5'-hydroxyl-kinase Clp1		Ace|R(2)	89	1145.58	2
	M	A	A	NatA	1	Ace(1)	Ace	AAQSA	AAQSAPKVVLKSTTKMSLNER	R	77	100	23	√					1.04712	0.06643	0.0314469		2	22	Q9Y3Y2	CHTOP_HUMAN	Chromatin target of PRMT1 protein		Ace|R(1)	29	820.126	3
	M	S	S	NatA	5	Ace(4), AcD3C13(1)	Ace	SSKTA	SSKTASTNNIAQAR	R	78	100	22	√					1.48961	0.574939	1.28211		2	15	Q9UBI6	GBG12_HUMAN	Guanine nucleotide-binding protein G(I)/G(S)/G(O) subunit gamma-12		Ace|R<C13N15>(1), AcD3C13|R(1), Ace|R(3)	99	769.401	2
	M	S	G	NatA	2	AcD3C13(1), Ace(1)	Ace	SGEDE	SGEDEQQEQTIAEDLVVTKYKMGGDIANR	R	78.5086	100	21.4914	√					0.886653	-0.173559	-0.5588		2	30	Q9UQ80	PA2G4_HUMAN	Proliferation-associated protein 2G4		AcD3C13|R(1), Ace|R(1)	72	1126.21	3
	M	T	L	NatA	1	AcD3C13(1)	AcD3C13	TLPGG	TLPGGPTGMAR	R	12	33	21	√					2.28987	1.19527	2.8078	99% siNatA	2	12	P23677	IP3KA_HUMAN	Inositol-trisphosphate 3-kinase A		AcD3C13|R(1)	36	560.792	2
	M	A	A	NatA	1	Ace(1)	Ace	AAKSQ	AAKSQPNIPKAKSLDGVTNDR	R	66	86	20	√					1.73554	0.795382	1.82429		2	22	Q9UBM7	DHCR7_HUMAN	7-dehydrocholesterol reductase		Ace|R(1)	65	798.441	3
	M	A	G	NatA	2	Ace(2)	Ace	AGTGL	AGTGLLALR	R	80	100	20	√					2.62714	1.39349	3.29533	99% siNatA	2	10	Q9BT30	ALKB7_HUMAN	Alpha-ketoglutarate-dependent dioxygenase alkB homolog 7, mitochondrial		Ace|R(1), Ace|R<C13N15>(1)	64	457.277	2
	M	A	V	NatA	3	Ace(2), AcD3C13(1)	Ace	AVEEL	AVEELQSIIKR	R	80	100	20	√					1.05497	0.0772072	0.0579533		2	12	Q92990	GLMN_HUMAN	Glomulin		Ace|R<C13N15>(1), Ace|R(1), AcD3C13|R(1)	70	687.901	2
	-	M	L	NatC or other	3	Ace(3)	Ace	MLSPE	MLSPEAER	R<C13N15>	78	98	20	√	√				0.873786	-0.194647	-0.610667		1	8	Q9NUG6	PDRG1_HUMAN	p53 and DNA damage-regulated protein 1		Ace|R<C13N15>(2), Ace|R(1)	37	500.735	2
	M	V	N	NatA	12	AcD3C13(10), Ace(2)	AcD3C13	VNPTV	VNPTVFFDIAVDGEPLGR	R<C13N15>	13	33	20	√	√	√	√	√	1.5536	0.635614	1.43134		2	19	P62937	PPIA_HUMAN	Peptidyl-prolyl cis-trans isomerase A		AcD3C13|R(5), AcD3C13|R<C13N15>(5), Ace|R(2)	92	1002.03	2
	-	M	V	other	7	Ace(4), AcD3C13(3)	AcD3C13	MVLDL	MVLDLDLFR	R<C13N15>	52	72	20	√					4.40893	2.14043	5.1324	99% siNatA	1	9	P49591	SYSC_HUMAN	Serine--tRNA ligase, cytoplasmic		Ace|R<C13N15>(3), Ace|R(1), AcD3C13|R<C13N15>(2), AcD3C13|R(1)	82	597.825	2
	M	A	A	NatA	2	AcD3C13(2)	AcD3C13	AADKG	AADKGPAAGPR	R<C13N15>	9	28	19	√				√	0.5336	-0.906169	-2.36064		2	12	Q8TDD1	DDX54_HUMAN	ATP-dependent RNA helicase DDX54		AcD3C13|R<C13N15>(1), AcD3C13|R(1)	70	557.813	2
	M	A	Q	NatA	1	Ace(1)	Ace	AQFDT	AQFDTEYQR	R<C13N15>	81	100	19	√					1.70569	0.770352	1.76273		2	10	Q7Z3C6	ATG9A_HUMAN	Autophagy-related protein 9A		Ace|R<C13N15>(1)	41	605.275	2
	M	A	K	NatA	3	Ace(2), AcD3C13(1)	Ace	AKATT	AKATTIKEALAR	R<C13N15>	81	100	19	√					0.908219	-0.138888	-0.473527		2	13	Q4LDG9	DNAL1_HUMAN	Dynein light chain 1, axonemal		Ace|R<C13N15>(1), Ace|R(1), AcD3C13|R(1)	96	709.931	2
	M	T	S	NatA	4	Ace(3), AcD3C13(1)	Ace	TSALE	TSALENYINR	R	81	100	19	√			√		1.02991	0.0425134	-0.0273753		2	11	O95777	NAA38_HUMAN	N-alpha-acetyltransferase 38, NatC auxiliary subunit		Ace|R<C13N15>(2), Ace|R(1), AcD3C13|R(1)	61	611.807	2
	M	A	G	NatA	1	Ace(1)	Ace	AGGGS	AGGGSDLSTR	R<C13N15>	81	100	19	√					0.846541	-0.240348	-0.723068		2	11	Q9H930	SP14L_HUMAN	Nuclear body protein SP140-like protein		Ace|R<C13N15>(1)	47	486.734	2
	M	A	L	NatA	3	Ace(2), AcD3C13(1)	Ace	ALSKG	ALSKGLR	R	81	100	19	√					1.21146	0.276745	0.548712		2	8	O15056	SYNJ2_HUMAN	Synaptojanin-2	Q8IX21 (644-650)	Ace|R<C13N15>(1), Ace|R(1), AcD3C13|R(1)	55	417.263	2
	-	M	V	other	1	Ace(1)	Ace	MVNPT	MVNPTVFFDIAVDGEPLGR	R<C13N15>	82	100	18	√	√	√			0.726471	-0.461024	-1.26581		1	19	P62937	PPIA_HUMAN	Peptidyl-prolyl cis-trans isomerase A		Ace|R<C13N15>(1)	66	1073.03	2
	M	A	D	NatA	7	Ace(6), AcD3C13(1)	Ace	ADGKA	ADGKAGDEKPEKSQR	R	74	92	18	√			√		0.869536	-0.201682	-0.627968		2	16	Q8WW12	PCNP_HUMAN	PEST proteolytic signal-containing nuclear protein		Ace|R(6), AcD3C13|R(1)	81	899.965	2
	M	A	A	NatA	3	Ace(2), AcD3C13(1)	Ace	AANYS	AANYSSTSTR	R	67	85	18	√					2.36134	1.2396	2.91684	99% siNatA	2	11	Q9BTV4	TMM43_HUMAN	Transmembrane protein 43		Ace|R(1), AcD3C13|R(1), Ace|R<C13N15>(1)	54	550.254	2
	-	M	T	other	2	Ace(2)	Ace	MTQQP	MTQQPLR	R	82	100	18	√					1.22477	0.292512	0.58749		1	7	Q9Y484	WIPI4_HUMAN	WD repeat domain phosphoinositide-interacting protein 4		Ace|R<C13N15>(1), Ace|R(1)	35	466.237	2
	-	M	V	other	2	Ace(2)	Ace	MVDMM	MVDMMDLPR	R<C13N15>	62	79	17	√					0.61235	-0.707572	-1.87219		1	9	P35244	RFA3_HUMAN	Replication protein A 14 kDa subunit		Ace|R<C13N15>(1), Ace|R(1)	44	604.255	2
	M	A	I	NatA	1	AcD3C13(1)	AcD3C13	AICQF	AICQFFLQGR	R	83.5913	100	16.4087	√					1.91124	0.934511	2.16647		2	11	O15504	NUPL2_HUMAN	Nucleoporin-like protein 2		AcD3C13|R(1)	44	643.837	2
	M	A	L	NatA	1	Ace(1)	Ace	ALFYV	ALFYVAR	R<C13N15>	75	91	16	√					0.672084	-0.573287	-1.54192		2	8	Q8N8A6	DDX51_HUMAN	ATP-dependent RNA helicase DDX51		Ace|R<C13N15>(1)	39	446.252	2
	M	A	E	NatA	6	Ace(6)	Ace	AEDME	AEDMETKIKNYKTAPFDSR	R	84	100	16	√				√	1.44343	0.5295	1.17036		2	20	P14854	CX6B1_HUMAN	Cytochrome c oxidase subunit 6B1		Ace|R(6)	93	1222.11	2
	M	S	A	NatA	4	Ace(4)	Ace	SASAP	SASAPAAEGEGTPTQPASEKEPEMPGPR	R	84	100	16	√					1.05769	0.08092	0.0670849		2	29	P35659	DEK_HUMAN	Protein DEK		Ace|R<C13N15>(2), Ace|R(2)	74	962.114	3
	M	S	A	NatA	1	Ace(1)	Ace	SAGGA	SAGGASVPPPPNPAVSFPPPR	R	84	100	16	√					1.4542	0.540224	1.19673		2	22	Q969L2	MAL2_HUMAN	Protein MAL2		Ace|R(1)	41	1021.03	2
	M	A	N	NatA	3	Ace(3)	Ace	ANLEE	ANLEESFPR	R	82	98	16	√					0.93254	-0.100763	-0.379761		2	10	Q14690	RRP5_HUMAN	Protein RRP5 homolog		Ace|R(2), Ace|R<C13N15>(1)	74	552.77	2
	M	A	A	NatA	3	Ace(3)	Ace	AALTT	AALTTLFKYIDENQDR	R	85	100	15	√					1.0768	0.106744	0.130599		2	17	Q96KP4	CNDP2_HUMAN	Cytosolic non-specific dipeptidase		Ace|R(2), Ace|R<C13N15>(1)	119	994.008	2
	M	A	T	NatA	3	Ace(2), AcD3C13(1)	Ace	ATEEF	ATEEFIIR	R	85	100	15	√					1.80743	0.853942	1.96832		2	9	Q14764	MVP_HUMAN	Major vault protein		Ace|R(1), Ace|R<C13N15>(1), AcD3C13|R(1)	54	510.772	2
	M	T	A	NatA	6	Ace(6)	Ace	TAAAT	TAAATATVLKEGVLEKR	R	85	100	15	√					0.853695	-0.228208	-0.693209		2	18	Q9Y5J5	PHLA3_HUMAN	Pleckstrin homology-like domain family A member 3		Ace|R(4), Ace|R<C13N15>(2)	100	947.551	2
	M	A	A	NatA	5	Ace(5)	Ace	AASAA	AASAAAASAAAASAASGSPGPGEGSAGGEKR	R	85	100	15	√				(√)	0.926019	-0.110887	-0.404659		2	32	Q13263	TIF1B_HUMAN	Transcription intermediary factor 1-beta		Ace|R(5)	133	878.09	3
	M	A	A	NatA	1	Ace(1)	Ace	AAEEP	AAEEPQQQKQEPLGSDSEGVNCLAYDEAIMAQQDR	R	85	100	15	√					0.999048	-0.00137465	-0.135317		2	36	Q96FW1	OTUB1_HUMAN	Ubiquitin thioesterase OTUB1		Ace|R(1)	50	1003.46	4
	M	A	G	NatA	2	Ace(2)	Ace	AGLTD	AGLTDLQR	R	86	100	14	√				(√)	1.14863	0.199911	0.359741		2	9	O75935	DCTN3_HUMAN	Dynactin subunit 3		Ace|R<C13N15>(1), Ace|R(1)	56	458.248	2
	M	A	D	NatA	1	Ace(1)	Ace	ADYST	ADYSTVPPPSSGSAGGGGGGGGGGGVNDAFKDALQR	R	86	100	14	√					0.622388	-0.684114	-1.8145		2	37	Q96AE4	FUBP1_HUMAN	Far upstream element-binding protein 1		Ace|R(1)	30	1655.27	2
	M	T	T	NatA	7	Ace(6), AcD3C13(1)	AcD3C13	TTAST	TTASTSQVR	R	86	100	14	√					0.993913	-0.00880846	-0.1536		2	10	P02794	FRIH_HUMAN	Ferritin heavy chain		Ace|R<C13N15>(3), Ace|R(3), AcD3C13|R(1)	78	499.267	2
	M	S	G	NatA	1	Ace(1)	Ace	SGSSS	SGSSSVAAMKKVVQQLR	R	86	100	14	√					1.35385	0.437064	0.943013		2	18	P63218	GBG5_HUMAN	Guanine nucleotide-binding protein G(I)/G(S)/G(O) subunit gamma-5		Ace|R(1)	58	964.533	2
	M	T	S	NatA	4	AcD3C13(4)	AcD3C13	TSDQD	TSDQDAKVVAEPQTQR	R	4	18	14	√					1.45451	0.540534	1.19749		2	17	Q92615	LAR4B_HUMAN	La-related protein 4B		AcD3C13|R(2), AcD3C13|R<C13N15>(2)	76	933.979	2
	M	A	E	NatA	3	Ace(2), AcD3C13(1)	Ace	AELGE	AELGEADEAELQR	R<C13N15>	86	100	14	√				√	0.980414	-0.028537	-0.202122		2	14	Q9Y5J9	TIM8B_HUMAN	Mitochondrial import inner membrane translocase subunit Tim8 B		Ace|R<C13N15>(1), Ace|R(1), AcD3C13|R(1)	68	741.851	2
	M	A	A	NatA	2	Ace(2)	Ace	AAAAV	AAAAVQGGR	R	86	100	14	√					1.35289	0.436047	0.940513		2	10	Q15005	SPCS2_HUMAN	Signal peptidase complex subunit 2		Ace|R(2)	58	421.728	2
	M	V	E	NatA	12	AcD3C13(11), Ace(1)	AcD3C13	VEKEE	VEKEEAGGGISEEEAAQYDR	R	9	23	14	√	√	√	√		1.06199	0.0867719	0.0814774		2	21	Q9UBE0	SAE1_HUMAN	SUMO-activating enzyme subunit 1		AcD3C13|R(8), Ace|R(1), AcD3C13|R<C13N15>(3)	159	1131.03	2
	M	A	G	NatA	2	Ace(2)	Ace	AGAAM	AGAAMAER	R	86	100	14	√					0.938323	-0.0918429	-0.357822		2	9	Q86UD0	SAPC2_HUMAN	Suppressor APC domain-containing protein 2		Ace|R<C13N15>(1), Ace|R(1)	67	417.692	2
	M	A	L	NatA	2	Ace(2)	Ace	ALTSF	ALTSFLPAPTQLSQDQLEAEEKAR	R	87	100	13	√					1.04277	0.0604225	0.0166717		2	25	Q13573	SNW1_HUMAN	SNW domain-containing protein 1		Ace|R<C13N15>(1), Ace|R(1)	103	1366.71	2
	-	M	L	NatC or other	8	AcD3C13(4), Ace(4)	AcD3C13	MLLLP	MLLLPSAADGR	R	41	53	12	√					0.796262	-0.328685	-0.940331		1	11	Q99543	DNJC2_HUMAN	DnaJ homolog subfamily C member 2		AcD3C13|R(2), AcD3C13|R<C13N15>(2), Ace|R(2), Ace|R<C13N15>(2)	64	603.829	2
	M	A	C	NatA	7	Ace(7)	Ace	ACGLV	ACGLVASNLNLKPGECLR	R	88	100	12	√					1.42136	0.507271	1.11569		2	19	P09382	LEG1_HUMAN	Galectin-1		Ace|R(4), Ace|R<C13N15>(3)	93	1031.03	2
	M	A	T	NatA	1	Ace(1)	Ace	ATEAQ	ATEAQSEGEVPAR	R<C13N15>	88	100	12	√					1.26426	0.338295	0.700092		2	14	Q14CB8	RHG19_HUMAN	Rho GTPase-activating protein 19		Ace|R<C13N15>(1)	38	698.831	2
	M	A	G	NatA	1	Ace(1)	Ace	AGLEV	AGLEVLFASAAPAITCR	R	88.3374	100	11.6626	√					0.998343	-0.00239319	-0.137822		2	18	Q92530	PSMF1_HUMAN	Proteasome inhibitor PI31 subunit		Ace|R(1)	55	894.97	2
	M	A	A	NatA	7	Ace(6), AcD3C13(1)	Ace	AAVDL	AAVDLEKLR	R<C13N15>	89	100	11	√					1.02529	0.0360283	-0.0433253		2	10	P17858	K6PL_HUMAN	6-phosphofructokinase, liver type		Ace|R<C13N15>(2), Ace|R(4), AcD3C13|R(1)	70	557.328	2
	-	M	V	other	11	AcD3C13(7), Ace(4)	AcD3C13	MVNFT	MVNFTVDQIR	R<C13N15>	22	33	11	√					0.557143	-0.843881	-2.20744		1	10	P13639	EF2_HUMAN	Elongation factor 2		AcD3C13|R<C13N15>(3), AcD3C13|R(4), Ace|R<C13N15>(2), Ace|R(2)	79	648.336	2
	M	G	G	NatA	1	AcD3C13(1)	AcD3C13	GGLAS	GGLASGGDVEPGLPVEVR	R	0	11	11	√					1.0445	0.0628156	0.0225574		2	19	P51116	FXR2_HUMAN	Fragile X mental retardation syndrome-related protein 2		AcD3C13|R(1)	88	878.465	2
	M	A	A	NatA	9	Ace(8), AcD3C13(1)	Ace	AAAAA	AAAAAMAEQESAR	R	89	100	11	√					0.769295	-0.378392	-1.06258		2	14	Q7L5D6	GET4_HUMAN	Golgi to ER traffic protein 4 homolog		Ace|R<C13N15>(4), Ace|R(4), AcD3C13|R(1)	103	667.804	2
	M	A	G	NatA	2	Ace(2)	Ace	AGPGS	AGPGSTGGQIGAAALAGGAR	R<C13N15>	89	100	11	√					0.702931	-0.508545	-1.38269		2	21	Q8N653	LZTR1_HUMAN	Leucine-zipper-like transcriptional regulator 1		Ace|R(1), Ace|R<C13N15>(1)	92	846.438	2
	M	A	A	NatA	2	Ace(2)	Ace	AAAAG	AAAAGGPCVR	R	89	100	11	√					0.889409	-0.16908	-0.547786		2	11	Q5SRE5	NU188_HUMAN	Nucleoporin NUP188 homolog		Ace|R<C13N15>(1), Ace|R(1)	66	486.24	2
	M	A	G	NatA	2	Ace(2)	Ace	AGSSE	AGSSEEAPDYGR	R	89	100	11	√					0.911677	-0.133406	-0.460045		2	13	Q9NRG1	PRDC1_HUMAN	Phosphoribosyltransferase domain-containing protein 1		Ace|R<C13N15>(1), Ace|R(1)	75	640.773	2
	-	M	V	other	4	AcD3C13(2), Ace(2)	AcD3C13	MVLSE	MVLSELAAR	R	35	46	11	√					1.18675	0.247012	0.475586		1	9	Q8TB03	CX038_HUMAN	Uncharacterized protein CXorf38		AcD3C13|R(1), AcD3C13|R<C13N15>(1), Ace|R(1), Ace|R<C13N15>(1)	73	526.792	2
	M	V	D	NatA	3	AcD3C13(3)	AcD3C13	VDYYE	VDYYEVLGVQR	R<C13N15>	3.76528	14.6029	10.8376	√					0.873185	-0.19564	-0.613109		2	12	O75190	DNJB6_HUMAN	DnaJ homolog subfamily B member 6		AcD3C13|R<C13N15>(1), AcD3C13|R(2)	73	699.369	2
	M	A	L	NatA	3	Ace(2), AcD3C13(1)	Ace	ALLCY	ALLCYNR	R	89.7663	100	10.2337	√					0.747577	-0.419706	-1.16419		2	8	Q9UHD1	CHRD1_HUMAN	Cysteine and histidine-rich domain-containing protein 1		Ace|R<C13N15>(1), Ace|R(1), AcD3C13|R(1)	56	476.24	2
	M	A	A	NatA	7	Ace(7)	Ace	AADIS	AADISESSGADCKGDPR	R<C13N15>	90	100	10	√			√		0.684344	-0.547206	-1.47778		2	18	O43583	DENR_HUMAN	Density-regulated protein		Ace|R<C13N15>(3), Ace|R(4)	106	917.909	2
	M	A	A	NatA	10	Ace(8), AcD3C13(2)	Ace	AAAAA	AAAAAAAAAAGAAGGR	R<C13N15>	90	100	10	√				√	1.06943	0.0968474	0.106258		2	17	Q86U42	PABP2_HUMAN	Polyadenylate-binding protein 2		Ace|R<C13N15>(4), Ace|R(4), AcD3C13|R(2)	118	625.828	2
	-	M	T	other	3	Ace(2), AcD3C13(1)	Ace	MTDYG	MTDYGEEQR	R<C13N15>	87	97	10	√					0.686143	-0.543419	-1.46846		1	9	Q9H446	RWDD1_HUMAN	RWD domain-containing protein 1		Ace|R<C13N15>(1), Ace|R(1), AcD3C13|R(1)	77	598.742	2
	M	A	A	NatA	2	Ace(2)	Ace	AAATG	AAATGAVAASAASGQAEGKKITDLR	R<C13N15>	90	100	10	√					0.899864	-0.152221	-0.50632		2	26	Q9NWH9	SLTM_HUMAN	SAFB-like transcription modulator		Ace|R(1), Ace|R<C13N15>(1)	86	1231.17	2
	M	A	T	NatA	7	Ace(7)	Ace	ATGAN	ATGANATPLDFPSKKR	R	90	100	10	√					0.91	-0.136062	-0.466577		2	17	Q15637	SF01_HUMAN	Splicing factor 1		Ace|R<C13N15>(4), Ace|R(3)	88	905.494	2
	M	A	N	NatA	2	Ace(2)	Ace	ANMQG	ANMQGLVER	R	91	100	9	√					0.700804	-0.512918	-1.39345		2	10	P40123	CAP2_HUMAN	Adenylyl cyclase-associated protein 2		Ace|R<C13N15>(1), Ace|R(1)	61	538.264	2
	M	A	G	NatA	14	Ace(14)	Ace	AGTVV	AGTVVLDDVELR	R	91	100	9	√					1.11415	0.155948	0.251616		2	13	P25205	MCM3_HUMAN	DNA replication licensing factor MCM3		Ace|R(7), Ace|R<C13N15>(7)	99	664.857	2
	M	A	A	NatA	1	Ace(1)	Ace	AAVVA	AAVVAKR	R	91	100	9	√					1.61406	0.690692	1.56681		2	8	Q9BV81	EMC6_HUMAN	ER membrane protein complex subunit 6		Ace|R(1)	49	402.258	2
	M	A	K	NatA	2	Ace(2)	Ace	AKPCG	AKPCGVR	R<C13N15>	91	100	9	√					1.22843	0.29682	0.598087		2	8	Q9UL46	PSME2_HUMAN	Proteasome activator complex subunit 2		Ace|R(1), Ace|R<C13N15>(1)	45	443.743	2
	M	A	G	NatA	1	Ace(1)	Ace	AGAGP	AGAGPAPGLPGAGGPVVPGPGAGIPGKSGEER	R	91	100	9	√					0.794933	-0.331095	-0.946258		2	33	Q9BTD8	RBM42_HUMAN	RNA-binding protein 42		Ace|R(1)	80	941.83	3
	M	A	V	NatA	2	Ace(2)	Ace	AVVPA	AVVPASLSGQDVGSFAYLTIKDR	R	91	100	9	√					0.815501	-0.294241	-0.855616		2	24	Q9H993	CF211_HUMAN	UPF0364 protein C6orf211		Ace|R(1), Ace|R<C13N15>(1)	44	828.443	3
	M	A	G	NatA	2	Ace(2)	Ace	AGPVK	AGPVKDR	R<C13N15>	91.4198	100	8.58018	√					0.994472	-0.00799682	-0.151604		2	8	Q9H633	RPP21_HUMAN	Ribonuclease P protein subunit p21		Ace|R<C13N15>(1), Ace|R(1)	54	421.241	2
	M	A	A	NatA	2	Ace(2)	Ace	AAAAP	AAAAPVAADDDER	R	91.458	100	8.542	√					0.666391	-0.58556	-1.57211		2	14	Q9H5N1	RABE2_HUMAN	Rab GTPase-binding effector protein 2		Ace|R<C13N15>(1), Ace|R(1)	77	657.302	2
	M	A	F	NatA	3	Ace(3)	Ace	AFANL	AFANLR	R<C13N15>	91.9269	100	8.07307	√					0.945404	-0.0809973	-0.331147		2	7	O43175	SERA_HUMAN	D-3-phosphoglycerate dehydrogenase		Ace|R<C13N15>(2), Ace|R(1)	50	372.208	2
	M	A	S	NatA	2	Ace(2)	Ace	ASGQG	ASGQGPGPPR	R<C13N15>	92	100	8	√					1.69816	0.76397	1.74703		2	11	Q16611	BAK_HUMAN	Bcl-2 homologous antagonist/killer		Ace|R(1), Ace|R<C13N15>(1)	57	488.247	2
	M	S	V	NatA	13	Ace(13)	Ace	SVPAF	SVPAFIDISEEDQAAELR	R	92	100	8	√					0.768013	-0.380796	-1.0685		2	19	Q7L2H7	EIF3M_HUMAN	Eukaryotic translation initiation factor 3 subunit M		Ace|R(6), Ace|R<C13N15>(7)	122	1016.5	2
	M	A	G	NatA	2	Ace(2)	Ace	AGLSD	AGLSDLELR	R<C13N15>	92	100	8	√					2.15968	1.11082	2.60009	99% siNatA	2	10	Q8NC56	LEMD2_HUMAN	LEM domain-containing protein 2		Ace|R(1), Ace|R<C13N15>(1)	66	513.279	2
	M	T	S	NatA	5	Ace(5)	Ace	TSPAA	TSPAAAQSR	R<C13N15>	92	100	8	√					0.742045	-0.430421	-1.19055		2	10	Q32MZ4	LRRF1_HUMAN	Leucine-rich repeat flightless-interacting protein 1		Ace|R(3), Ace|R<C13N15>(2)	68	470.739	2
	M	S	Y	NatA	1	Ace(1)	Ace	SYGEI	SYGEIEGKFLGPR	R<C13N15>	92	100	8	√					0.946552	-0.0792468	-0.326842		2	14	Q92802	N42L2_HUMAN	NEDD4-binding protein 2-like 2		Ace|R<C13N15>(1)	39	776.406	2
	M	A	G	NatA	6	Ace(4), AcD3C13(2)	Ace	AGGGG	AGGGGDLSTR	R	92	100	8	√					1.37552	0.459976	0.999364		2	11	P23497	SP100_HUMAN	Nuclear autoantigen Sp-100		Ace|R(2), Ace|R<C13N15>(2), AcD3C13|R(2)	97	466.725	2
	M	A	E	NatA	2	Ace(2)	Ace	AESII	AESIIIR	R<C13N15>	92	100	8	√					1.06207	0.0868775	0.0817371		2	8	Q8TAT6	NPL4_HUMAN	Nuclear protein localization protein 4 homolog		Ace|R<C13N15>(1), Ace|R(1)	70	427.254	2
	M	A	A	NatA	2	Ace(2)	Ace	AATDL	AATDLER	R	92.2256	100	7.77439	√					1.20367	0.26744	0.525826		2	8	Q92599	SEPT8_HUMAN	Septin-8		Ace|R(1), Ace|R<C13N15>(1)	43	409.206	2
	M	A	A	NatA	3	Ace(3)	Ace	AAPSD	AAPSDGFKPR	R	92.2269	100	7.77311	√					0.790698	-0.338802	-0.965212		2	11	Q92979	NEP1_HUMAN	Ribosomal RNA small subunit methyltransferase NEP1		Ace|R<C13N15>(2), Ace|R(1)	70	567.798	2
	M	S	Q	NatA	53	Ace(53)	Ace	SQAEF	SQAEFEKAAEEVR	R<C13N15>	92.8672	100	7.13277	√					1.27952	0.355601	0.742656		2	14	P07108	ACBP_HUMAN	Acyl-CoA-binding protein		Ace|R(31), Ace|R<C13N15>(22)	112	796.893	2
	M	A	N	NatA	4	Ace(4)	Ace	ANNDA	ANNDAVLKR	R	93	100	7	√					0.970933	-0.0425567	-0.236603		2	10	Q12904	AIMP1_HUMAN	Aminoacyl tRNA synthase complex-interacting multifunctional protein 1		Ace|R<C13N15>(1), Ace|R(3)	70	545.304	2
	M	S	K	NatA	2	Ace(2)	Ace	SKYKL	SKYKLIMLR	R	93	100	7	√					1.361	0.444669	0.961718		2	10	P07738	PMGE_HUMAN	Bisphosphoglycerate mutase		Ace|R(1), Ace|R<C13N15>(1)	58	652.391	2
	M	A	A	NatA	6	Ace(5), AcD3C13(1)	Ace	AALVL	AALVLEDGSVLR	R<C13N15>	93	100	7	√					0.802955	-0.31661	-0.910631		2	13	P27708	PYR1_HUMAN	CAD protein		Ace|R<C13N15>(2), Ace|R(3), AcD3C13|R(1)	87	647.866	2
	M	A	A	NatA	2	Ace(2)	Ace	AASET	AASETVR	R	93	100	7	√					0.991825	-0.0118424	-0.161062		2	8	P38432	COIL_HUMAN	Coilin		Ace|R(1), Ace|R<C13N15>(1)	60	388.201	2
	M	A	A	NatA	2	Ace(2)	Ace	AAAAA	AAAAAAGSGTPR	R<C13N15>	93	100	7	√					0.80708	-0.309217	-0.892449		2	13	Q9NR33	DPOE4_HUMAN	DNA polymerase epsilon subunit 4		Ace|R<C13N15>(1), Ace|R(1)	75	526.772	2
	M	A	A	NatA	2	Ace(2)	Ace	AAGTL	AAGTLYTYPENWR	R	93	100	7	√					1.30769	0.387023	0.819939		2	14	P26641	EF1G_HUMAN	Elongation factor 1-gamma		Ace|R<C13N15>(1), Ace|R(1)	40	792.378	2
	M	S	S	NatA	2	Ace(2)	Ace	SSSPV	SSSPVNVKKLKVSELKEELKKR	R	93	100	7	√				√	1.04302	0.0607641	0.0175118		2	23	Q00839	HNRPU_HUMAN	Heterogeneous nuclear ribonucleoprotein U		Ace|R(2)	36	950.913	3
	M	A	A	NatA	2	Ace(2)	Ace	AAEDE	AAEDELQLPR	R	93	100	7	√			√		0.552163	-0.856833	-2.2393		2	11	P78318	IGBP1_HUMAN	Immunoglobulin-binding protein 1		Ace|R<C13N15>(1), Ace|R(1)	66	592.302	2
	M	A	A	NatA	2	Ace(2)	Ace	AAQIP	AAQIPIVATTSTPGIVR	R<C13N15>	93	100	7	√					1.0566	0.0794345	0.0634313		2	18	Q6PI98	IN80C_HUMAN	INO80 complex subunit C		Ace|R(1), Ace|R<C13N15>(1)	70	874.003	2
	M	A	S	NatA	2	Ace(2)	Ace	ASQPN	ASQPNSSAKKKEEKGKNIQVVVR	R	93	100	7	√					1.04088	0.0578015	0.0102254		2	24	P52732	KIF11_HUMAN	Kinesin-like protein KIF11		Ace|R(1), Ace|R<C13N15>(1)	45	934.874	3
	M	A	N	NatA	1	Ace(1)	Ace	ANDSP	ANDSPAKSLVDIDLSSLR	R	93	100	7	√					0.951149	-0.0722561	-0.309648		2	19	O95819	M4K4_HUMAN	Mitogen-activated protein kinase kinase kinase kinase 4		Ace|R(1)	74	995.526	2
	M	A	F	NatA	1	Ace(1)	Ace	AFTNY	AFTNYSSLNR	R	93	100	7	√					0.930603	-0.103762	-0.387135		2	11	Q9Y6X9	MORC2_HUMAN	MORC family CW-type zinc finger protein 2		Ace|R(1)	66	607.794	2
	M	S	G	NatA	2	Ace(2)	Ace	SGEEN	SGEENPASKPTPVQDVQGDGR	R	93	100	7	√				√	1.28955	0.366873	0.77038		2	22	Q15102	PA1B3_HUMAN	Platelet-activating factor acetylhydrolase IB subunit gamma		Ace|R(2)	92	1129.04	2
	M	A	G	NatA	4	Ace(4)	Ace	AGAAT	AGAATQASLESAPR	R	93	100	7	√					0.812532	-0.299504	-0.86856		2	15	Q9BXR0	TGT_HUMAN	Queuine tRNA-ribosyltransferase		Ace|R<C13N15>(2), Ace|R(2)	104	686.347	2
	M	A	A	NatA	2	Ace(2)	Ace	AAAAP	AAAAPAAAAASSEAPAASATAEPEAGDQDSR	R<C13N15>	93	100	7	√					1.31301	0.392881	0.834346		2	32	Q15283	RASA2_HUMAN	Ras GTPase-activating protein 2		Ace|R(1), Ace|R<C13N15>(1)	97	945.769	3
	M	V	D	NatA	9	Ace(9)	Ace	VDMMD	VDMMDLPR	R	93	100	7	√					1	0	-0.131936		2	9	P35244	RFA3_HUMAN	Replication protein A 14 kDa subunit		Ace|R<C13N15>(5), Ace|R(4)	48	525.733	2
	M	A	F	NatA	3	Ace(3)	Ace	AFLKL	AFLKLR	R<C13N15>	93	100	7	√					1.10033	0.13794	0.207324		2	7	O15084	CAC1A_HUMAN	Serine/threonine-protein phosphatase 6 regulatory ankyrin repeat subunit A	O00555 (375-380), Q00975 (371-376)	Ace|R(2), Ace|R<C13N15>(1)	42	423.775	2
	M	A	V	NatA	1	Ace(1)	Ace	AVPPT	AVPPTYADLGKSAR	R	93	100	7	√					1.27042	0.345308	0.717343		2	15	P21796	VDAC1_HUMAN	Voltage-dependent anion-selective channel protein 1		Ace|R(1)	51	767.914	2
	M	S	S	NatA	5	Ace(5)	Ace	SSKKA	SSKKAKTKTTKKR	R<C13N15>	93.0886	100	6.91145	√					1.08685	0.120159	0.163592		2	14	O14950	ML12B_HUMAN	Myosin regulatory light chain 12B		Ace|R(4), Ace|R<C13N15>(1)	51	913.588	2
	M	V	T	NatA	1	AcD3C13(1)	AcD3C13	VTEQE	VTEQEVDAIGQTLVDPKQPLQAR	R	93.4205	100	6.57947	√					1.73852	0.797856	1.83037		2	24	Q9BU89	DOHH_HUMAN	Deoxyhypusine hydroxylase		AcD3C13|R(1)	82	877.144	3
	M	S	S	NatA	3	Ace(2), AcD3C13(1)	Ace	SSESS	SSESSKKR	R	93.8489	100	6.15114	√					0.92671	-0.10981	-0.402012		2	9	Q13769	THOC5_HUMAN	THO complex subunit 5 homolog		Ace|R(1), AcD3C13|R(1), Ace|R<C13N15>(1)	56	522.785	2
	M	S	E	NatA	1	Ace(1)	Ace	SEQEA	SEQEAQAPGGR	R	93.9422	100	6.05778	√					1.35139	0.434439	0.936558		2	12	Q96AQ2	TM125_HUMAN	Transmembrane protein 125		Ace|R(1)	38	586.271	2
	M	A	G	NatA	4	Ace(4)	Ace	AGQAF	AGQAFR	R<C13N15>	94	100	6	√					1.16601	0.221577	0.413027		2	7	P61604	CH10_HUMAN	10 kDa heat shock protein, mitochondrial	Q86WI1 (2465-2470)	Ace|R<C13N15>(4)	47	351.184	2
	M	A	Q	NatA	21	Ace(21)	Ace	AQDQG	AQDQGEKENPMR	R	94	100	6	√				√	0.765294	-0.385914	-1.08108		2	13	P62913	RL11_HUMAN	60S ribosomal protein L11		Ace|R<C13N15>(10), Ace|R(11)	81	754.344	2
	M	A	S	NatA	2	Ace(2)	Ace	ASALE	ASALEQFVNSVR	R<C13N15>	94	100	6	√				√	0.983701	-0.0237079	-0.190245		2	13	Q9UNS2	CSN3_HUMAN	COP9 signalosome complex subunit 3		Ace|R<C13N15>(1), Ace|R(1)	86	686.859	2
	M	S	N	NatA	3	Ace(3)	Ace	SNLSK	SNLSKGTGSR	R	94	100	6	√					0.803851	-0.315001	-0.906674		2	11	Q13618	CUL3_HUMAN	Cullin-3		Ace|R<C13N15>(2), Ace|R(1)	85	548.29	2
	M	S	E	NatA	2	Ace(2)	Ace	SELDQ	SELDQLR	R	94	100	6	√					1.15748	0.210985	0.386976		2	8	P62873	GBB1_HUMAN	Guanine nucleotide-binding protein G(I)/G(S)/G(T) subunit beta-1		Ace|R(1), Ace|R<C13N15>(1)	47	451.733	2
	M	S	E	NatA	2	Ace(2)	Ace	SESSS	SESSSKSSQPLASKQEKDGTEKR	R	94	100	6	√				√	1.05951	0.0833932	0.0731676		2	24	P17096	HMGA1_HUMAN	High mobility group protein HMG-I/HMG-Y		Ace|R(2)	78	1362.7	2
	M	A	G	NatA	2	Ace(2)	Ace	AGDLS	AGDLSAGFFMEELNTYR	R<C13N15>	94	100	6	√					1.67545	0.744553	1.69928		2	18	P19525	E2AK2_HUMAN	Interferon-induced, double-stranded RNA-activated protein kinase		Ace|R(1), Ace|R<C13N15>(1)	84	994.951	2
	M	A	A	NatA	2	Ace(2)	Ace	AASAL	AASALYACTKCTQR	R<C13N15>	94	100	6	√					0.832917	-0.263756	-0.780638		2	15	Q5HYJ3	FA76B_HUMAN	Protein FAM76B		Ace|R(1), Ace|R<C13N15>(1)	45	850.409	2
	M	A	V	NatA	1	Ace(1)	Ace	AVPGC	AVPGCNKDSVR	R<C13N15>	94	100	6	√					0.681114	-0.554032	-1.49457		2	12	Q8N9Q2	SR1IP_HUMAN	Protein SREK1IP1		Ace|R<C13N15>(1)	37	651.329	2
	M	A	G	NatA	2	Ace(2)	Ace	AGAGS	AGAGSAAVSGAGTPVAGPTGR	R	94	100	6	√					0.793858	-0.333047	-0.951057		2	22	O95295	SNAPN_HUMAN	SNARE-associated protein Snapin		Ace|R(1), Ace|R<C13N15>(1)	136	877.445	2
	M	A	A	NatA	8	Ace(8)	Ace	AAAET	AAAETQSLR	R	94.9017	100	5.09834	√				(√)	0.880168	-0.184149	-0.584847		2	10	Q13523	PRP4B_HUMAN	Serine/threonine-protein kinase PRP4 homolog		Ace|R(4), Ace|R<C13N15>(4)	82	494.757	2
	M	A	L	NatA	7	Ace(7)	Ace	ALDGP	ALDGPEQMELEEGKAGSGLR	R	95	100	5	√	√	√		(√)	0.996667	-0.00481702	-0.143783		2	21	P62195	PRS8_HUMAN	26S protease regulatory subunit 8		Ace|R(4), Ace|R<C13N15>(3)	109	1096.53	2
	M	A	A	NatA	3	Ace(3)	Ace	AAEAA	AAEAADLGLGAAVPVELR	R	95	100	5	√				(√)	1.11595	0.158277	0.257342		2	19	Q9Y5Q8	TF3C5_HUMAN	General transcription factor 3C polypeptide 5		Ace|R(2), Ace|R<C13N15>(1)	99	882.979	2
	M	T	A	NatA	1	Ace(1)	Ace	TAPCP	TAPCPPPPPDPQFVLR	R<C13N15>	95	100	5	√					0.604889	-0.725258	-1.91569		2	17	Q9BYB4	GNB1L_HUMAN	Guanine nucleotide-binding protein subunit beta-like protein 1		Ace|R<C13N15>(1)	52	920.968	2
	M	S	K	NatA	20	Ace(20)	Ace	SKKIS	SKKISGGSVVEMQGDEMTR	R	95	100	5	√					1.13982	0.188807	0.332431		2	20	O75874	IDHC_HUMAN	Isocitrate dehydrogenase [NADP] cytoplasmic		Ace|R(11), Ace|R<C13N15>(9)	152	1104.04	2
	M	S	G	NatA	2	Ace(2)	Ace	SGLVL	SGLVLGQR	R	95	100	5	√					1.08244	0.114291	0.149159		2	9	Q9NSK0	KLC4_HUMAN	Kinesin light chain 4		Ace|R(1), Ace|R<C13N15>(1)	52	436.253	2
	M	A	M	NatA	3	Ace(3)	Ace	AMDSS	AMDSSLQAR	R<C13N15>	95	100	5	√					0.982407	-0.0256067	-0.194915		2	10	Q99661	KIF2C_HUMAN	Kinesin-like protein KIF2C		Ace|R(1), Ace|R<C13N15>(2)	57	523.744	2
	M	A	A	NatA	23	Ace(23)	Ace	AAYKL	AAYKLVLIR	R	95	100	5	√				(√)	1.35915	0.442709	0.956897		2	10	P18669	PGAM1_HUMAN	Phosphoglycerate mutase 1	Q8N0Y7 (2-10)	Ace|R<C13N15>(12), Ace|R(11)	62	568.364	2
	M	A	S	NatA	2	Ace(2)	Ace	ASSSG	ASSSGNDDDLTIPR	R<C13N15>	95	100	5	√				(√)	1.15701	0.210398	0.385534		2	15	Q01658	NC2B_HUMAN	Protein Dr1		Ace|R<C13N15>(1), Ace|R(1)	51	750.346	2
	M	A	V	NatA	8	Ace(8)	Ace	AVASD	AVASDFYLR	R<C13N15>	95	100	5	√					1.60063	0.678642	1.53717		2	10	Q96A72	MGN2_HUMAN	Protein mago nashi homolog 2		Ace|R(4), Ace|R<C13N15>(4)	84	547.281	2
	M	T	D	NatA	2	Ace(2)	Ace	TDYGE	TDYGEEQR	R	95	100	5	√					1.08754	0.121074	0.165844		2	9	Q9H446	RWDD1_HUMAN	RWD domain-containing protein 1		Ace|R<C13N15>(1), Ace|R(1)	58	520.22	2
	M	A	A	NatA	5	Ace(5)	Ace	AAPAQ	AAPAQQTTQPGGGKR	R	95	100	5	√					1.03507	0.0497299	-0.0096266		2	16	Q9NXG2	THUM1_HUMAN	THUMP domain-containing protein 1		Ace|R(3), Ace|R<C13N15>(2)	77	778.911	2
	M	V	L	NatA	3	AcD3C13(3)	AcD3C13	VLSEL	VLSELAAR	R<C13N15>	0	5	5	√					1.22176	0.288958	0.578749		2	9	Q8TB03	CX038_HUMAN	Uncharacterized protein CXorf38		AcD3C13|R(2), AcD3C13|R<C13N15>(1)	69	458.278	2
	M	A	A	NatA	3	Ace(3)	Ace	AAPEG	AAPEGSGLGEDAR	R<C13N15>	95.0764	99.9947	4.91826	√				(√)	1.01462	0.0209329	-0.080452		2	14	Q96G03	PGM2_HUMAN	Phosphoglucomutase-2		Ace|R(2), Ace|R<C13N15>(1)	97	641.301	2
	M	A	A	NatA	7	Ace(7)	Ace	AAADG	AAADGDDSLYPIAVLIDELR	R	95.1285	100	4.8715	√					1.15354	0.206068	0.374883		2	21	P30153	2AAA_HUMAN	Serine/threonine-protein phosphatase 2A 65 kDa regulatory subunit A alpha isoform		Ace|R(4), Ace|R<C13N15>(3)	95	1080.05	2
	M	A	A	NatA	2	Ace(2)	Ace	AAESG	AAESGSDFQQR	R	95	99.7641	4.76412	√				√	0.328167	-1.6075	-4.08555	99% siCTR	2	12	Q96BP3	PPWD1_HUMAN	Peptidylprolyl isomerase domain and WD repeat-containing protein 1		Ace|R<C13N15>(1), Ace|R(1)	86	619.276	2
	M	A	G	NatA	4	Ace(4)	Ace	AGLEL	AGLELLSDQGYR	R	95.3562	100	4.64377	√					1.16355	0.218528	0.405528		2	13	Q9NPD3	EXOS4_HUMAN	Exosome complex component RRP41		Ace|R(2), Ace|R<C13N15>(2)	91	682.347	2

## Sheet: Table S3
	P1 (if any)	P1'	P2'	NAT type	MS2 spectra	N-term mods (MS2 spectra)	N-term HS	P1'-P5'	Sequence	C-term HS	NTA siNatA corr (%)	NTA siCTR corr (%)	∆ NTA	siNatA-affected substrate A-431 (this study)	S37P B-cells	S37P fibroblasts	siNatA HeLa	NAA15 --/+, KO affected substrate	N-term ratio corr	log2 ratio	Significance	Significant (setup)	Start	Stop	Accession	UNIPROT	Description	Isoforms	N- and C-term (MS2 spectra)	Mascot highest score (HS)	precursor HS	charge HS
	-	M	E	NatB	2	Ace(2)	Ace	MEPEA	MEPEAPR	R<C13N15>	N.D.	100	N.D.						Singleton siCTR			99% siCTR	1	7	P48163	MAOX_HUMAN	NADP-dependent malic enzyme		Ace|R<C13N15>(2)	38	449.204	2
	M	P	A	none	10	AcD3C13(10)	AcD3C13	PAVSL	PAVSLPPKENALFKR	R<C13N15>	0	0	0						0.1399	-2.83753	-7.11079	99% siCTR	2	16	Q9BXJ9	NAA15_HUMAN	N-alpha-acetyltransferase 15, NatA auxiliary subunit		AcD3C13|R<C13N15>(6), AcD3C13|R(4)	65	606.698	3
	M	A	P	none	1	AcD3C13(1)	AcD3C13	APQKD	APQKDR	R	0	0	0						0.26455	-1.91839	-4.85017	99% siCTR	2	7	Q6P5R6	RL22L_HUMAN	60S ribosomal protein L22-like 1		AcD3C13|R(1)	42	404.735	2
	M	A	E	NatA	4	Ace(4)	Ace	AEGGG	AEGGGPEPGEQER	R<C13N15>	100	100	0						0.316065	-1.66171	-4.21887	99% siCTR	2	14	Q14CS0	UBX2B_HUMAN	UBX domain-containing protein 2B		Ace|R<C13N15>(2), Ace|R(2)	58	682.801	2
	M	A	A	NatA	2	Ace(2)	Ace	AAESG	AAESGSDFQQR	R	95	99.7641	4.76412	√				√	0.328167	-1.6075	-4.08555	99% siCTR	2	12	Q96BP3	PPWD1_HUMAN	Peptidylprolyl isomerase domain and WD repeat-containing protein 1		Ace|R<C13N15>(1), Ace|R(1)	86	619.276	2
	M	S	V	NatA	4	Ace(4)	Ace	SVATG	SVATGSSETAGGASGGGAR	R<C13N15>	100	100	0						0.3397	-1.55767	-3.96298	99% siCTR	2	20	Q8TAE6	PP14C_HUMAN	Protein phosphatase 1 regulatory subunit 14C		Ace|R(2), Ace|R<C13N15>(2)	161	816.379	2
	M	M	T	other	2	Ace(2)	Ace	MTSVG	MTSVGTNR	R	≥92	100	N.D.						0.34748	-1.525	-3.88264	99% siCTR	2	9	Q14157	UBP2L_HUMAN	Ubiquitin-associated protein 2-like		Ace|R<C13N15>(1), Ace|R(1)	41	462.216	2
	-	M	T	other	1	Ace(1)	Ace	MTGKS	MTGKSVKDVDR	R<C13N15>	100	100	0						0.35008	-1.51424	-3.85619	99% siCTR	1	11	Q8WU79	SMAP2_HUMAN	Stromal membrane-associated protein 2		Ace|R<C13N15>(1)	37	699.368	2
	-	M	T	other	4	Ace(2), AcD3C13(2)	AcD3C13	MTSAL	MTSALENYINR	R<C13N15>	41	36	-5						0.38408	-1.38052	-3.5273	99% siCTR	1	11	O95777	NAA38_HUMAN	N-alpha-acetyltransferase 38, NatC auxiliary subunit		Ace|R<C13N15>(2), AcD3C13|R<C13N15>(1), AcD3C13|R(1)	53	692.841	2
	R	M	E	NatB	2	Ace(2)	Ace	MEKKI	MEKKIQR	R<C13N15>	100	100	0						0.3843	-1.3797	-3.52527	99% siCTR	122	128	Q9H0G5	NSRP1_HUMAN	Nuclear speckle splicing regulatory protein 1		Ace|R<C13N15>(1), Ace|R(1)	40	547.814	2
	M	C	S	NatA	2	Ace(2)	Ace	CSLAS	CSLASGATGGR	R	100	100	0						0.41211	-1.2789	-3.27736	99% siCTR	2	12	O60678	ANM3_HUMAN	Protein arginine N-methyltransferase 3		Ace|R<C13N15>(1), Ace|R(1)	88	539.751	2
	-	M	E	NatB	2	Ace(2)	Ace	MESAL	MESALAVPR	R<C13N15>	100	100	0						0.416495	-1.26363	-3.23981	99% siCTR	1	9	Q96EM0	T3HPD_HUMAN	Trans-L-3-hydroxyproline dehydratase		Ace|R<C13N15>(1), Ace|R(1)	72	521.267	2
	M	A	A	NatA	1	Ace(1)	Ace	AADVF	AADVFMCSPR	R	N.D.	N.D.	N.D.						0.423497	-1.23958	-3.18065	99% siCTR	2	11	Q9HAP2	MLXIP_HUMAN	MLX-interacting protein		Ace|R(1)	34	606.263	2
	M	T	C	NatA	2	Ace(2)	Ace	TCKMS	TCKMSQLER	R<C13N15>	100	100	0						0.42703	-1.22759	-3.15117	99% siCTR	2	10	P06702	S10A9_HUMAN	Protein S100-A9		Ace|R<C13N15>(1), Ace|R(1)	38	634.304	2
	-	M	I	NatC or other	2	Ace(2)	Ace	MIPVT	MIPVTEFR	R	100	100	0						0.42874	-1.22183	-3.13699	99% siCTR	1	8	Q8TDW0	LRC8C_HUMAN	Leucine-rich repeat-containing protein 8C		Ace|R<C13N15>(1), Ace|R(1)	48	525.768	2
	M	G	S	NatA	1	Ace(1)	Ace	GSEAA	GSEAAQLLEAADFAAR	R<C13N15>	49.4172	100	50.5828	√					0.43159	-1.21227	-3.11348	99% siCTR	2	17	Q8N4P3	MESH1_HUMAN	Guanosine-3',5'-bis(diphosphate) 3'-pyrophosphohydrolase MESH1		Ace|R<C13N15>(1)	82	836.416	2
	M	P	S	none	2	AcD3C13(2)	AcD3C13	PSEKT	PSEKTFKQR	R<C13N15>	0	0	0						0.43409	-1.20393	-3.09299	99% siCTR	2	10	A6NCE7	MP3B2_HUMAN	Microtubule-associated proteins 1A/1B light chain 3 beta 2	Q9GZQ8 (2-10)	AcD3C13|R<C13N15>(1), AcD3C13|R(1)	60	636.367	2
	-	M	T	other	2	Ace(1), AcD3C13(1)	Ace	MTLEE	MTLEEFSAGEQKTER	R<C13N15>	75	72	-3						0.456492	-1.13134	-2.91444	99% siCTR	1	15	P24522	GA45A_HUMAN	Growth arrest and DNA damage-inducible protein GADD45 alpha		Ace|R<C13N15>(1), AcD3C13|R<C13N15>(1)	70	935.94	2
	M	S	Q	NatA	1	Ace(1)	Ace	SQGSV	SQGSVTFR	R<C13N15>	100	100	0						0.45885	-1.12391	-2.89616	99% siCTR	2	9	P52738	ZN140_HUMAN	Zinc finger protein 140		Ace|R<C13N15>(1)	38	467.237	2
	M	A	L	NatA	1	Ace(1)	Ace	ALADS	ALADSTR	R	≥94	100	N.D.						0.46853	-1.09379	-2.82208	99% siCTR	2	8	Q96CX2	KCD12_HUMAN	BTB/POZ domain-containing protein KCTD12		Ace|R(1)	39	388.201	2
	M	A	A	NatA	3	Ace(2), AcD3C13(1)	AcD3C13	AAGGS	AAGGSGVGGKR	R	28	79	51	√				√	0.469837	-1.08977	-2.8122	99% siCTR	2	12	Q9NZM5	GSCR2_HUMAN	Glioma tumor suppressor candidate region gene 2 protein		Ace|R<C13N15>(1), AcD3C13|R(1), Ace|R(1)	97	505.788	2
	-	M	V	other	4	AcD3C13(2), Ace(2)	Ace	MVLIK	MVLIKEFR	R	53	49	-4						0.4755	-1.07248	-2.76968	99% siCTR	1	8	P48739	PIPNB_HUMAN	Phosphatidylinositol transfer protein beta isoform		AcD3C13|R(1), Ace|R<C13N15>(1), AcD3C13|R<C13N15>(1), Ace|R(1)	66	570.826	2
	-	M	V	other	1	AcD3C13(1)	AcD3C13	MVNVP	MVNVPKTR	R<C13N15>	0	0	0						0.48186	-1.05331	-2.72254	99% siCTR	1	8	P83881	RL36A_HUMAN	60S ribosomal protein L36a	Q969Q0 (1-8)	AcD3C13|R<C13N15>(1)	38	532.809	2
	M	A	A	NatA	5	Ace(5)	Ace	AAVPE	AAVPELLQQQEEDR	R<C13N15>	100	100	0						0.494013	-1.01738	-2.63416	99% siCTR	2	15	Q9Y5X3	SNX5_HUMAN	Sorting nexin-5		Ace|R<C13N15>(3), Ace|R(2)	90	839.42	2
	-	M	T	other	2	Ace(2)	Ace	MTSLA	MTSLAQQLQR	R	100	100	0						0.497758	-1.00648	-2.60736	99% siCTR	1	10	Q9H583	HEAT1_HUMAN	HEAT repeat-containing protein 1		Ace|R<C13N15>(1), Ace|R(1)	85	617.317	2
	M	P	V	none	3	AcD3C13(3)	AcD3C13	PVAGS	PVAGSELPR	R	0	0	0						0.49948	-1.0015	-2.59511	99% siCTR	2	10	P04818	TYSY_HUMAN	Thymidylate synthase		AcD3C13|R<C13N15>(2), AcD3C13|R(1)	85	486.777	2
	-	M	E	NatB	2	Ace(2)	Ace	MEESP	MEESPLSR	R<C13N15>	100	100	0						0.49963	-1.00107	-2.59404	99% siCTR	1	8	Q9P1Z2	CACO1_HUMAN	Calcium-binding and coiled-coil domain-containing protein 1		Ace|R<C13N15>(1), Ace|R(1)	57	508.733	2
	-	M	E	NatB	1	Ace(1)	Ace	MESNF	MESNFNQEGVPR	R	100	100	0						2.14792	1.10294	2.58072	99% siNatA	1	12	Q96Q89	KI20B_HUMAN	Kinesin-like protein KIF20B		Ace|R(1)	54	733.323	2
	M	A	G	NatA	2	Ace(2)	Ace	AGLSD	AGLSDLELR	R<C13N15>	92	100	8	√					2.15968	1.11082	2.60009	99% siNatA	2	10	Q8NC56	LEMD2_HUMAN	LEM domain-containing protein 2		Ace|R(1), Ace|R<C13N15>(1)	66	513.279	2
	-	M	E	NatB	1	Ace(1)	Ace	MEVTA	MEVTADQPR	R	100	100	0						2.18269	1.12611	2.6377	99% siNatA	1	9	P23771	GATA3_HUMAN	Trans-acting T-cell-specific transcription factor GATA-3		Ace|R(1)	55	552.753	2
	-	M	Y	NatC or other	2	AcD3C13(2)	AcD3C13	MYLQV	MYLQVETR	R	0	0	0						2.1875	1.12928	2.64551	99% siNatA	1	8	Q9BQA9	CQ062_HUMAN	Uncharacterized protein C17orf62		AcD3C13|R(1), AcD3C13|R<C13N15>(1)	45	551.781	2
	M	A	T	NatA	4	Ace(4)	Ace	ATGQK	ATGQKLMR	R<C13N15>	100	100	0						2.18927	1.13045	2.64838	99% siNatA	2	9	Q08257	QOR_HUMAN	Quinone oxidoreductase		Ace|R(2), Ace|R<C13N15>(2)	66	510.28	2
	M	A	E	NatA	5	Ace(5)	Ace	AENSV	AENSVLTSTTGR	R<C13N15>	100	100	0						2.19399	1.13356	2.65602	99% siNatA	2	13	Q9H8V3	ECT2_HUMAN	Protein ECT2		Ace|R<C13N15>(2), Ace|R(3)	53	644.324	2
	-	M	M	other	3	Ace(3)	Ace	MMVES	MMVESASETIR	R	100	100	0						2.19429	1.13376	2.65651	99% siNatA	1	11	Q8IVH2	FOXP4_HUMAN	Forkhead box protein P4		Ace|R(2), Ace|R<C13N15>(1)	60	664.298	2
	-	M	E	NatB	1	Ace(1)	Ace	MEPLA	MEPLAAYPLKCSGPR	R	100	100	0						2.20467	1.14056	2.67325	99% siNatA	1	15	Q8TED1	GPX8_HUMAN	Probable glutathione peroxidase 8		Ace|R(1)	37	897.948	2
	-	M	E	NatB	1	Ace(1)	Ace	MEENN	MEENNDSTENPQQGQGR	R	100	100	0						2.21223	1.1455	2.6854	99% siNatA	1	17	Q8N264	RHG24_HUMAN	Rho GTPase-activating protein 24		Ace|R(1)	29	996.405	2
	M	T	L	NatA	1	AcD3C13(1)	AcD3C13	TLPGG	TLPGGPTGMAR	R	12	33	21	√					2.28987	1.19527	2.8078	99% siNatA	2	12	P23677	IP3KA_HUMAN	Inositol-trisphosphate 3-kinase A		AcD3C13|R(1)	36	560.792	2
	-	M	E	NatB	1	Ace(1)	Ace	MEVAP	MEVAPEQPR	R	100	100	0						2.35154	1.23361	2.90209	99% siNatA	1	9	P23769	GATA2_HUMAN	Endothelial transcription factor GATA-2		Ace|R(1)	51	557.764	2
	M	A	A	NatA	3	Ace(2), AcD3C13(1)	Ace	AANYS	AANYSSTSTR	R	67	85	18	√					2.36134	1.2396	2.91684	99% siNatA	2	11	Q9BTV4	TMM43_HUMAN	Transmembrane protein 43		Ace|R(1), AcD3C13|R(1), Ace|R<C13N15>(1)	54	550.254	2
	M	A	A	NatA	1	Ace(1)	Ace	AAVDS	AAVDSDVESLPR	R	58	100	42	√					2.36426	1.24139	2.92123	99% siNatA	2	13	Q9H6E5	STPAP_HUMAN	Speckle targeted PIP5K1A-regulated poly(A) polymerase		Ace|R(1)	75	650.823	2
	R	M	Q	NatB or other	1	Ace(1)	Ace	MQSTY	MQSTYNYNMR	R	100	100	0						2.38814	1.25589	2.95689	99% siNatA	99	108	O95793	STAU1_HUMAN	Double-stranded RNA-binding protein Staufen homolog 1		Ace|R(1)	27	691.279	2
	M	A	S	NatA	2	Ace(2)	Ace	ASSLL	ASSLLAGER	R	100	100	0						2.4109	1.26957	2.99055	99% siNatA	2	10	Q8N511	TM199_HUMAN	Transmembrane protein 199		Ace|R(1), Ace|R<C13N15>(1)	88	473.254	2
	M	A	A	NatA	2	AcD3C13(2)	AcD3C13	AAEKQ	AAEKQVPGGGGGGGSGGGGGSGGGGSGGGR	R	19	53	34	√					2.41205	1.27026	2.99224	99% siNatA	2	31	Q9UHB9	SRP68_HUMAN	Signal recognition particle subunit SRP68		AcD3C13|R(2)	156	1169.05	2
	M	A	D	NatA	1	Ace(1)	Ace	ADSVK	ADSVKTFLQDLAR	R	100	100	0						2.47742	1.30884	3.08712	99% siNatA	2	14	O14681	EI24_HUMAN	Etoposide-induced protein 2.4 homolog		Ace|R(1)	68	776.92	2
	R	M	D	NatB	1	Ace(1)	Ace	MDELG	MDELGAGIAQSR	R	100	100	0						2.47941	1.31	3.08997	99% siNatA	239	250	Q96LD4	TRI47_HUMAN	Tripartite motif-containing protein 47		Ace|R(1)	58	653.31	2
	-	M	D	NatB	3	Ace(3)	Ace	MDGKQ	MDGKQGGMDGSKPAGPR	R	100	100	0						2.51745	1.33196	3.144	99% siNatA	1	17	Q96DX5	ASB9_HUMAN	Ankyrin repeat and SOCS box protein 9		Ace|R(2), Ace|R<C13N15>(1)	55	619.624	3
	-	M	F	NatC or other	2	Ace(2)	Ace	MFAKG	MFAKGKGSAVPSDGQAR	R	100	100	0						2.53289	1.34079	3.1657	99% siNatA	1	17	Q9BWW4	SSBP3_HUMAN	Single-stranded DNA-binding protein 3		Ace|R(2)	60	929.975	2
	M	A	L	NatA	1	Ace(1)	Ace	ALMQE	ALMQELYSTPASR	R	100	100	0						2.54174	1.34582	3.17807	99% siNatA	2	14	Q15646	OASL_HUMAN	2'-5'-oligoadenylate synthase-like protein		Ace|R(1)	70	762.872	2
	M	A	G	NatA	2	Ace(2)	Ace	AGTGL	AGTGLLALR	R	80	100	20	√					2.62714	1.39349	3.29533	99% siNatA	2	10	Q9BT30	ALKB7_HUMAN	Alpha-ketoglutarate-dependent dioxygenase alkB homolog 7, mitochondrial		Ace|R(1), Ace|R<C13N15>(1)	64	457.277	2
	-	M	D	NatB	2	Ace(2)	Ace	MDNFF	MDNFFTEGTR	R<C13N15>	100	100	0						2.64142	1.40131	3.31457	99% siNatA	1	10	Q9HD67	MYO10_HUMAN	Unconventional myosin-X		Ace|R(1), Ace|R<C13N15>(1)	69	643.274	2
	-	M	E	NatB	2	Ace(2)	Ace	MEVDA	MEVDAPGVDGR	R	100	100	0						2.64664	1.40416	3.32157	99% siNatA	1	11	Q8WVX3	CD003_HUMAN	Uncharacterized protein C4orf3		Ace|R(1), Ace|R<C13N15>(1)	62	602.269	2
	-	M	V	other	1	Ace(1)	Ace	MVAKQ	MVAKQR	R	≥96	≥96	N.D.						2.65084	1.40645	3.3272	99% siNatA	1	6	Q8N6R1	SERP2_HUMAN	Stress-associated endoplasmic reticulum protein 2	Q9Y6X1 (1-6)	Ace|R(1)	33	419.234	2
	-	M	E	NatB	1	Ace(1)	Ace	MEGVS	MEGVSALLAR	R	100	100	0						2.65551	1.40899	3.33344	99% siNatA	1	10	Q5SNT2	TM201_HUMAN	Transmembrane protein 201		Ace|R(1)	69	552.79	2
	-	M	D	NatB	2	Ace(2)	Ace	MDVNI	MDVNIAPLR	R<C13N15>	100	100	0						2.66705	1.41524	3.34883	99% siNatA	1	9	O75915	PRAF3_HUMAN	PRA1 family protein 3		Ace|R(1), Ace|R<C13N15>(1)	77	548.788	2
	-	M	E	NatB	1	Ace(1)	Ace	MEKLY	MEKLYSENEGMASNQGKMENEEQPQDER	R	100	100	0						2.67666	1.42043	3.36159	99% siNatA	1	28	Q96EI5	TCAL4_HUMAN	Transcription elongation factor A protein-like 4		Ace|R(1)	37	1162.5	3
	-	M	N	NatB or other	2	Ace(1), AcD3C13(1)	Ace	MNIFD	MNIFDR	R	74	70	-4						2.69955	1.43272	3.39181	99% siNatA	1	6	P55061	BI1_HUMAN	Bax inhibitor 1		Ace|R(1), AcD3C13|R(1)	59	427.197	2
	M	A	N	NatA	5	Ace(5)	Ace	ANKGP	ANKGPSYGMSR	R<C13N15>	100	100	0						2.7172	1.44212	3.41493	99% siNatA	2	12	Q01995	TAGL_HUMAN	Transgelin		Ace|R(3), Ace|R<C13N15>(2)	58	641.807	2
	M	A	T	NatA	1	Ace(1)	Ace	ATATP	ATATPVPPR	R	100	100	0						2.77092	1.47037	3.4844	99% siNatA	2	10	P20700	LMNB1_HUMAN	Lamin-B1		Ace|R(1)	37	476.267	2
	-	M	D	NatB	4	Ace(4)	Ace	MDALD	MDALDASKLLDEELYSR	R<C13N15>	100	100	0						2.77389	1.47191	3.4882	99% siNatA	1	17	P41226	UBA7_HUMAN	Ubiquitin-like modifier-activating enzyme 7		Ace|R(3), Ace|R<C13N15>(1)	83	1042.51	2
	-	M	F	NatC or other	3	AcD3C13(3)	AcD3C13	MFAPA	MFAPAVMR	R	3	2	-1						2.81543	1.49336	3.54094	99% siNatA	1	8	Q9P0S2	COX16_HUMAN	Cytochrome c oxidase assembly protein COX16 homolog, mitochondrial		AcD3C13|R(2), AcD3C13|R<C13N15>(1)	57	501.249	2
	M	A	E	NatA	1	Ace(1)	Ace	AELQL	AELQLDPAMAGLGGGGGSGVGDGGGPVR	R	100	100	0						2.81933	1.49535	3.54585	99% siNatA	2	29	Q14681	KCTD2_HUMAN	BTB/POZ domain-containing protein KCTD2		Ace|R(1)	36	837.402	3
	-	M	K	other	1	AcD3C13(1)	AcD3C13	MKVTS	MKVTSLDGR	R	≥4	≥4	N.D.						2.88301	1.52758	3.6251	99% siNatA	1	9	Q16690	DUS5_HUMAN	Dual specificity protein phosphatase 5		AcD3C13|R(1)	44	558.805	2
	-	M	F	NatC or other	1	Ace(1)	Ace	MFNGE	MFNGEPGPASSGASR	R	100	100	0						2.89964	1.53587	3.64551	99% siNatA	1	15	Q9UJD0	RIMS3_HUMAN	Regulating synaptic membrane exocytosis protein 3		Ace|R(1)	39	761.833	2
	-	M	D	NatB	2	Ace(2)	Ace	MDDDI	MDDDIAALVVDNGSGMCKAGFAGDDAPR	R	100	100	0						3.10646	1.63527	3.88998	99% siNatA	1	28	P60709	ACTB_HUMAN	Actin, cytoplasmic 1		Ace|R(2)	76	997.104	3
	M	T	L	NatA	1	Ace(1)	Ace	TLEEF	TLEEFSAGEQKTER	R<C13N15>	43.3839	75.4579	32.0739	√					3.37729	1.75587	4.18658	99% siNatA	2	15	P24522	GA45A_HUMAN	Growth arrest and DNA damage-inducible protein GADD45 alpha		Ace|R<C13N15>(1)	48	862.422	2
	-	M	D	NatB	1	Ace(1)	Ace	MDAIL	MDAILNYR	R	100	100	0						3.41908	1.77361	4.23021	99% siNatA	1	8	Q9UKB3	DJC12_HUMAN	DnaJ homolog subfamily C member 12		Ace|R(1)	43	527.255	2
	-	M	I	NatC or other	2	Ace(2)	Ace	MILGS	MILGSLSR	R	100	100	0						3.44206	1.78327	4.25398	99% siNatA	1	8	Q96PM9	Z385A_HUMAN	Zinc finger protein 385A		Ace|R<C13N15>(1), Ace|R(1)	47	467.755	2
	-	M	E	NatB	1	Ace(1)	Ace	MEPSG	MEPSGSEQLFEDPDPGGKSQDAEAR	R	100	100	0						3.44733	1.78548	4.25941	99% siNatA	1	25	O94876	TMCC1_HUMAN	Transmembrane and coiled-coil domains protein 1		Ace|R(1)	55	928.075	3
	-	M	L	NatC or other	2	Ace(2)	Ace	MLSST	MLSSTAMYSAPGR	R<C13N15>	100	100	0						3.58519	1.84205	4.39855	99% siNatA	1	13	P20618	PSB1_HUMAN	Proteasome subunit beta type-1		Ace|R(1), Ace|R<C13N15>(1)	62	728.328	2
	-	M	E	NatB	1	Ace(1)	Ace	MELLC	MELLCCEGTR	R	100	100	0						3.67403	1.87736	4.4854	99% siNatA	1	10	P30281	CCND3_HUMAN	G1/S-specific cyclin-D3		Ace|R(1)	54	663.778	2
	-	M	L	NatC or other	2	Ace(2)	Ace	MLKPA	MLKPALEPR	R	100	100	0						3.80923	1.9295	4.61363	99% siNatA	1	9	P40306	PSB10_HUMAN	Proteasome subunit beta type-10		Ace|R(1), Ace|R<C13N15>(1)	49	580.328	2
	-	M	V	other	7	Ace(4), AcD3C13(3)	AcD3C13	MVLDL	MVLDLDLFR	R<C13N15>	52	72	20	√					4.40893	2.14043	5.1324	99% siNatA	1	9	P49591	SYSC_HUMAN	Serine--tRNA ligase, cytoplasmic		Ace|R<C13N15>(3), Ace|R(1), AcD3C13|R<C13N15>(2), AcD3C13|R(1)	82	597.825	2
	-	M	E	NatB	1	Ace(1)	Ace	MEGDF	MEGDFSVCR	R	100	100	0						5.54001	2.46989	5.9427	99% siNatA	1	9	Q6GPH4	XAF1_HUMAN	XIAP-associated factor 1		Ace|R(1)	63	579.731	2
	M	S	K	NatA	1	Ace(1)	Ace	SKGTS	SKGTSSDTSLGR	R	N.D.	N.D.	N.D.						7.15356	2.83866	6.84969	99% siNatA	2	13	Q9GZY8	MFF_HUMAN	Mitochondrial fission factor		Ace|R(1)	37	642.823	2
	M	S	Q	NatA	1	Ace(1)	Ace	SQSGA	SQSGAVSCCPGATNGSLGR	R	N.D.	N.D.	N.D.						Singleton siNatA			99% siNatA	2	20	Q9H6S3	ES8L2_HUMAN	Epidermal growth factor receptor kinase substrate 8-like protein 2		Ace|R(1)	106	954.421	2
	M	A	T	NatA	1	Ace(1)	Ace	ATVQQ	ATVQQLEGR	R	100	N.D.	N.D.						Singleton siNatA			99% siNatA	2	10	Q01469	FABP5_HUMAN	Fatty acid-binding protein, epidermal		Ace|R(1)	66	522.278	2

## Sheet: Table S4
	Description	size	P-value	FDR q-value	Enrichment (N, B, n, b)	GO category
	A. enriched GO terms siCTR
	cytoplasmic translation	9	9.46e-06	0.00267	5.43 (1335,11,201,9)	GOBP
	formation of cytoplasmic translation initiation complex	6	0.000552	0.0958	4.41 (1335,6,303,6)	GOBP
	cell chemotaxis	7	0.000574	0.097	4.23 (1335,8,276,7)	GOBP
	ribosomal small subunit biogenesis	7	0.000855	0.132	3.43 (1335,7,389,7)	GOBP
	translational initiation	31	5.28e-12	3.57e-08	3.21 (1335,38,339,31)	GOBP
	SRP-dependent cotranslational protein targeting to membrane	21	1.46e-07	0.000165	2.83 (1335,24,413,21)	GOBP
	tRNA aminoacylation for protein translation	12	0.000242	0.0527	2.36 (1335,12,566,12)	GOBP
	translation initiation factor activity	14	1e-05	0.00373	3.43 (1335,18,303,14)	GOMF
	rRNA binding	9	0.000893	0.0947	3.25 (1335,11,336,9)	GOMF
	translation factor activity, RNA binding	18	7.01e-06	0.00347	3.03 (1335,26,305,18)	GOMF
	structural constituent of ribosome	22	5.11e-08	7.59e-05	2.84 (1335,25,413,22)	GOMF
	aminoacyl-tRNA ligase activity	10	0.000455	0.0845	2.61 (1335,10,512,10)	GOMF
	large ribosomal subunit	12	8.42e-09	8.83e-06	6.13 (1335,13,201,12)	GOCC
	eukaryotic 48S preinitiation complex	6	0.000552	0.0579	4.41 (1335,6,303,6)	GOCC
	ribosomal subunit	24	3.1e-08	1.63e-05	2.77 (1335,28,413,24)	GOCC
	small ribosomal subunit	13	0.000974	0.0729	2.32 (1335,15,498,13)	GOCC
	B. enriched GO terms siNatA
	regulation of viral genome replication	8	2.55e-05	0.173	6.54 (1335,12,136,8)	GOBP
	positive regulation of cell communication	8	0.000608	0.294	5.44 (1335,131,15,8)	GOBP
	anatomical structure formation involved in morphogenesis	9	0.000492	0.277	5.18 (1335,40,58,9)	GOBP
	cornification	6	0.000606	0.315	5.09 (1335,7,225,6)	GOBP
	regulation of cellular response to growth factor stimulus	8	0.00088	0.175	4.30 (1335,13,191,8)	GOBP
	regulation of cyclin-dependent protein kinase activity	9	0.000317	0.357	4.23 (1335,14,203,9)	GOBP
	epithelial cell differentiation	16	0.000373	0.252	2.04 (1335,17,616,16)	GOBP
	structural constituent of cytoskeleton	9	0.000945	0.351	2.64 (1335,9,505,9)	GOMF
	intrinsic component of organelle membrane	8	6.47e-05	0.00678	6.25 (1335,14,122,8)	GOCC
	intermediate filament	6	0.000606	0.0424	5.09 (1335,7,225,6)	GOCC
	endoplasmic reticulum	22	9.72e-07	0.00017	3.45 (1335,63,135,22)	GOCC
